# Supplementary material for: C363 群落微気候モデルMINCERを用いた高山落葉広葉樹林サイトTKYにおける熱フラックスの推定(スペシャル・セッション「iLEAPS(the Integrated Land Ecosystem-Atmosphere Processes Study)」)
Source: Royal Society of Chemistry journal article supplement (doi:10.1039/d0cc02549f), 2008-10-31

## Rhodium-Catalyzed Diastereo- and Enantioselective Cyclopropanation of $\alpha$ -Boryl Styrenes

### Supporting Information

#### Contents:

|      |                                                                                                           |
|------|-----------------------------------------------------------------------------------------------------------|
| S-1  | Table of contents                                                                                         |
| S-2  | General experimental                                                                                      |
| S-3  | $\alpha$ -boryl styrenes <b>2</b>                                                                         |
| S-5  | The Structures of Rh Catalyst                                                                             |
| S-6  | X-ray crystal structure of <b>3ba</b>                                                                     |
| S-12 | DFT Study                                                                                                 |
| S-17 | Cyclopropylboronates <b>3</b>                                                                             |
| S-39 | Attempts at other substrates                                                                              |
| S-40 | 1,4-dicarbonyl compounds <b>4aa</b>                                                                       |
| S-41 | NMR Copies of styrenes <b>2</b> , Cyclopropylboronates <b>3</b> and 1,4-dicarbonyl compounds <b>4aa</b> . |

## General.

All of the reagents were purchased from Acros, Sigma-Aldrich, AlfaAesar, Aladdin, Accela, or Adamas, and they were used as received. All of the solvents were distilled using the classic method before use. The reactions were monitored by thin-layer chromatography (TLC) on 2.5 × 10 cm, 250 μm analytical plates coated with silica gel 60 F254, and they were purchased from Qingdao Haiyang Chemical Co. Ltd. The thin-layer chromatography plates were visualized by exposure to the ultraviolet light (UV, 254 nm) or Phosphomolybdic acid. Purification of the synthetic compounds by the flash column chromatography employed the neutral silica gel (200-300 mesh or 300-400 mesh), which was purchased from Qingdao Haiyang Chemical Co. Ltd. The <sup>1</sup>H, <sup>13</sup>C and <sup>19</sup>F NMR spectra were recorded on a Bruker 400 MHz spectrometer, and the tetramethylsilane (δ = 0) was used as an internal standard, and CDCl<sub>3</sub> (δ = 7.26) for <sup>1</sup>H NMR (400 MHz) and CDCl<sub>3</sub> (δ = 77.16) for <sup>13</sup>C NMR (100 MHz). NMR multiplicities are abbreviated as follows: s = singlet, d = doublet, t = triplet, q = quint, m = multiplet. The <sup>13</sup>C NMR were obtained with an APT technology [methyl and methine (down), methylene and quaternary carbon (up)]. The <sup>11</sup>B NMR spectra were recorded on Bruker AX-400 MHz instruments and spectral data were reported in ppm. The enantiomeric excess was determined with Daicel chiral columns on Shimadzu HPLC (Model: LC20AT). Optical rotation was measured by the AUTOPOL IV. The IR spectra were recorded on a Perkein Elmer with a potassium bromide crystal optic rectangle. High-resolution mass spectra (HRMS) were measured on an LTQ Orbitrap XL Domain35A (Thermo Fisher) spectrometer, and the electrospray ionization (ESI) was used as the ion source. X-ray diffraction data were collected on Agilent SuperNova Eos diffractometer.

## Preparation of α-boryl styrenes 2

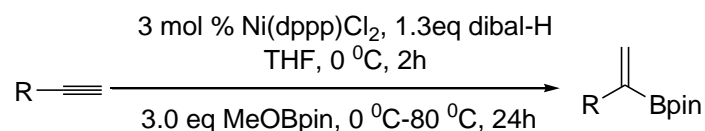

### Representative preparation for α-boryl styrenes via Hoveyda's procedure<sup>1</sup>:

In an inert gas atmosphere, Ni (dppp)Cl<sub>2</sub> (81mg, 0.15 mmol, 0.03eq) was placed in a 100mL flask with a constant pressure dropping funnel and reflux condenser. Added tetrahydrofuran (THF, 10 mL) via syringe, and then dibal-H (6.5 mL, 6.5 mmol, 1.3eq) was added dropwise at 22 °C. The resulting black solution was cooled to 0 °C (ice bath), and then phenylacetylene (510 mg, 5 mmol, 1eq) was slowly added dropwise over five minutes. Stirred for another 2 hours and the reaction system was cooled to 0 °C with the 2-methoxy-4,4,5,5-tetramethyl-1,3,2-dioxaborane (2.6 g, 15mmol, 3eq) added dropwise to the reaction solution. The resulting solution was heated to 80 °C and stirred for 24 hours. Then the reaction was quenched by adding water (15.0 mL) dropwise at 0 °C (ice bath). The mixture was allowed to warm to 22 °C, stirred for an additional hour, and then washed with ether acetate (25.0 mL × 3). The combined organic layers were dried over anhydrous MgSO<sub>4</sub> and concentrated under vacuum. After chromatography the desired product was obtained as a yellow oil (0.82 g, 3.55 mmol, 71% yield). Further purification by vacuum distillation get white solid product **2a**, and the phase state was different from the literature's description.

### Reference:

[1] F. Gao, A. H. Hoveyda, *J. Am. Chem. Soc.*, 2010, **132**, 10961.

#### 4,4,5,5-tetramethyl-2-(1-phenylvinyl)-1,3,2-dioxaborolane (2a)

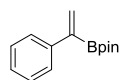

**<sup>1</sup>H NMR** (400 MHz, CDCl<sub>3</sub>) δ 7.48 (d, *J* = 7.6 Hz, 2H), 7.32 (t, *J* = 7.2 Hz, 2H), 7.24 (t, *J* = 7.6 Hz, 1H), 6.07 (t, *J* = 4.8 Hz, 2H), 1.32 (s, 12H) ppm. **<sup>13</sup>C NMR** (100 MHz, CDCl<sub>3</sub>) δ 141.5, 131.1, 128.5, 128.3, 128.1, 127.3, 127.2, 83.9 (2C), 25.0 (4C) ppm [Note: the carbon attached to boron was not observed due to quadrupole broadening caused by the <sup>11</sup>B nucleus]. **IR**  $\tilde{\nu}$  (cm<sup>-1</sup>) 1307, 1145, 887, 850. **M. P.** 44.0 – 45.8 °C. **Yield** = 71%.

#### 2-(1-(4-fluorophenyl)vinyl)-4,4,5,5-tetramethyl-1,3,2-dioxaborolane (2b)

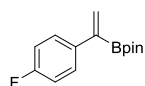

The compound is prepared as described in general procedure and is the light yellow solid. **<sup>1</sup>H NMR** (400 MHz, CDCl<sub>3</sub>) δ 7.47 – 7.43 (m, 2H), 7.02 – 6.97 (m, 2H), 6.04 (s, 2H), 1.32 (s, 12H) ppm. **<sup>13</sup>C NMR** (100 MHz, CDCl<sub>3</sub>) δ 162.3 (d, *J* = 245 Hz), 137.5 (d, *J* = 3 Hz), 130.9, 128.9 (d, *J* = 8 Hz, 2C), 115.1 (d, *J* = 8 Hz, 2C), 84.0 (2C), 24.9 (4C) ppm [Note: the carbon attached to boron was not observed due to quadrupole broadening caused by the <sup>11</sup>B nucleus]. **<sup>19</sup>F NMR** (376 MHz, CDCl<sub>3</sub>) δ -116.11 ppm. **ESI-HR** calcd for C<sub>14</sub>H<sub>18</sub>BFO<sub>2</sub>H<sup>+</sup> ([M+H]<sup>+</sup>) 249.14567, found 249.14487. **IR**  $\tilde{\nu}$  (cm<sup>-1</sup>) 1317, 1145, 888, 851. **M. P.** 43.2 – 44.1 °C. **Yield** = 80%.

#### 2-(1-(4-chlorophenyl)vinyl)-4,4,5,5-tetramethyl-1,3,2-dioxaborolane (2c)

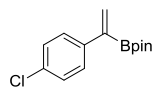

The compound is prepared as described in general procedure and is the light yellow solid. **<sup>1</sup>H NMR** (400 MHz, CDCl<sub>3</sub>) δ 7.41 (d, *J* = 8.4 Hz, 2H), 7.27 (d, *J* = 8.4 Hz, 2H), 6.07 (s, 2H), 1.32 (s, 12H) ppm. **<sup>13</sup>C NMR** (100 MHz, CDCl<sub>3</sub>) δ 140.0, 133.0, 131.5, 128.7 (2C), 128.4 (2C), 84.1 (2C), 24.9 (4C) ppm [Note: the carbon attached to boron was not observed due to quadrupole broadening caused by the <sup>11</sup>B nucleus]. **ESI-HR** calcd for C<sub>14</sub>H<sub>18</sub>BClO<sub>2</sub>H<sup>+</sup> ([M+H]<sup>+</sup>) 265.11611, found 265.11502. **IR**  $\tilde{\nu}$  (cm<sup>-1</sup>) 1318, 1145, 888, 851. **M. P.** 52.3 – 52.5 °C. **Yield** = 71%.

#### 2-(1-(3-fluorophenyl)vinyl)-4,4,5,5-tetramethyl-1,3,2-dioxaborolane (2d)

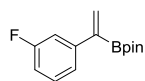

The compound is prepared as described in the general procedure, and is the colorless oil. **<sup>1</sup>H NMR** (400 MHz, CDCl<sub>3</sub>) δ 7.28 – 7.25 (m, 2H), 7.23 – 7.19 (m, 1H), 6.96 – 6.91 (m, 1H), 6.10 (s, 2H), 1.32 (s, 12H) ppm. **<sup>13</sup>C NMR** (100 MHz, CDCl<sub>3</sub>) δ 164.2, 132.1, 129.7 (d, *J* = 8 Hz), 123.0 (d, *J* = 2 Hz), 114.3 (d, *J* = 21 Hz), 113.9 (d, *J* = 22 Hz), 84.1 (2C), 25.0 (4C) ppm [Note: the carbon attached to boron was not observed due to quadrupole broadening caused by the <sup>11</sup>B nucleus]. **<sup>19</sup>F NMR** (376 MHz, CDCl<sub>3</sub>) δ -114.03 ppm. **ESI-HR** calcd for C<sub>14</sub>H<sub>18</sub>BFO<sub>2</sub>H<sup>+</sup> ([M+H]<sup>+</sup>) 249.14567, found 249.14459. **IR**  $\tilde{\nu}$  (cm<sup>-1</sup>) 1317, 1143, 868, 851. **Yield** = 67%.

#### 2-(1-(3,5-bis(trifluoromethyl)phenyl)vinyl)-4,4,5,5-tetramethyl-1,3,2-dioxaborolane (2e)

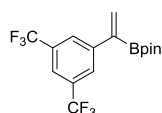

The compound is prepared as described in the general procedure, and is the

yellow oil.  $^1\text{H NMR}$  (400 MHz,  $\text{CDCl}_3$ )  $\delta$  7.92 (s, 2H), 7.75 (s, 1H), 6.25 (d,  $J = 2.4$  Hz, 1H), 6.19 (d,  $J = 2.0$  Hz, 1H), 1.32 (s, 12H) ppm.  $^{13}\text{C NMR}$  (100 MHz,  $\text{CDCl}_3$ )  $\delta$  143.5, 134.2 (2C), 131.5 (dd,  $J = 33$  Hz, 2C), 127.6 (d,  $J = 3$  Hz, 2C), 125.0, 120.8 (qui,  $J = 3.8$  Hz), 84.5 (2C), 25.0 (4C) ppm [Note: the carbon attached to boron was not observed due to quadrupole broadening caused by the  $^{11}\text{B}$  nucleus].  $^{19}\text{F NMR}$  (376 MHz,  $\text{CDCl}_3$ )  $\delta$  -62.91 ppm. **ESI-HR** calcd for  $\text{C}_{16}\text{H}_{17}\text{BF}_6\text{O}_2\text{H}^+$  ( $[\text{M}+\text{H}]^+$ ) 367.12986, found 367.13028. **IR**  $\tilde{\nu}$  ( $\text{cm}^{-1}$ ) 1324, 1135, 806, 847. **Yield** = 68%.

#### 4,4,5,5-tetramethyl-2-(1-(p-tolyl)vinyl)-1,3,2-dioxaborolane (2f)

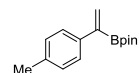

The compound is prepared as described in the general procedure.  $^1\text{H NMR}$  (400 MHz,  $\text{CDCl}_3$ )  $\delta$  7.37 (d,  $J = 8.0$  Hz, 2H), 7.12 (d,  $J = 8.0$  Hz, 2H), 6.04 (d,  $J = 2.4$  Hz, 1H), 6.04 (d,  $J = 2.4$  Hz, 1H), 2.33 (s, 3H), 1.32 (s, 12H) ppm.  $^{13}\text{C NMR}$  (100 MHz,  $\text{CDCl}_3$ )  $\delta$  138.7, 136.8, 130.2, 129.0 (2C), 127.2 (2C), 83.9 (2C), 24.9 (4C), 21.3 ppm. [Note: the carbon attached to boron was not observed due to quadrupole broadening caused by the  $^{11}\text{B}$  nucleus]. **ESI-HR** calcd for  $\text{C}_{15}\text{H}_{21}\text{BO}_2\text{H}^+$  ( $[\text{M}+\text{H}]^+$ ) 245.17074, found 245.16991. **IR**  $\tilde{\nu}$  ( $\text{cm}^{-1}$ ) 1307, 1144, 889, 852. **M. P.** 63.8 – 64.1 °C. **Yield** = 62%.

#### 2-(1-(4-methoxyphenyl)vinyl)-4,4,5,5-tetramethyl-1,3,2-dioxaborolane (2g)

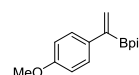

$^1\text{H NMR}$  (400 MHz,  $\text{CDCl}_3$ )  $\delta$  7.45 (dd,  $J = 2.4, 4.4$  Hz, 2H), 6.86 (dd,  $J = 2.4, 4.4$  Hz, 2H), 6.01 (d,  $J = 2.8$  Hz, 1H), 5.96 (d,  $J = 2.8$  Hz, 1H), 3.80 (s, 3H), 1.32 (s, 12H) ppm.  $^{13}\text{C NMR}$  (100 MHz,  $\text{CDCl}_3$ )  $\delta$  159.0, 134.1, 129.2, 128.4 (2C), 113.8 (2C), 83.9 (2C), 55.4, 24.8 (4C) ppm [Note: the carbon attached to boron was not observed due to quadrupole broadening caused by the  $^{11}\text{B}$  nucleus]. **ESI-HR** calcd for  $\text{C}_{15}\text{H}_{21}\text{BO}_3\text{H}^+$  ( $[\text{M}+\text{H}]^+$ ) 261.16565, found 261.16449. **IR**  $\tilde{\nu}$  ( $\text{cm}^{-1}$ ) 1303, 1145, 889, 852. **M. P.** 44.9 – 46.1 °C. **Yield** = 72%.

The Structures of Rh Catalyst

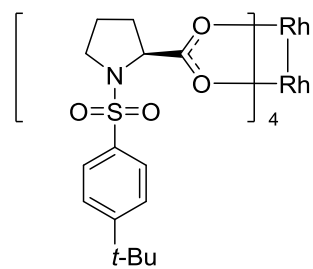

$Rh_2(S-TBSP)_4$

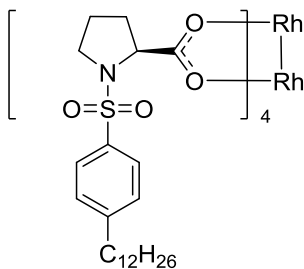

$Rh_2(S-DOSP)_4$

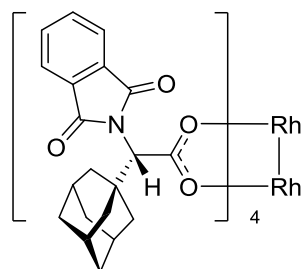

$Rh_2(S-PTAD)_4$

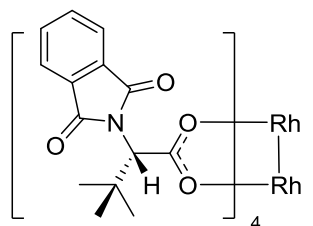

$Rh_2(S-PTTL)_4$

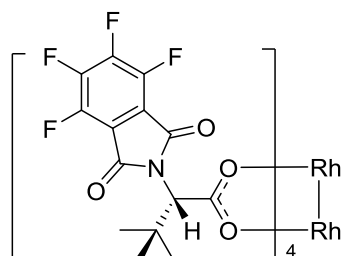

$Rh_2(S-TFPTTL)_4$

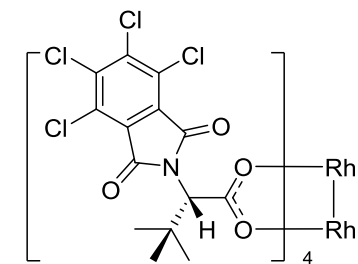

$Rh_2(S-TCPTTL)_4$

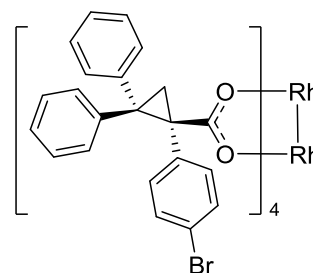

$Rh_2(S-BTPCP)_4$

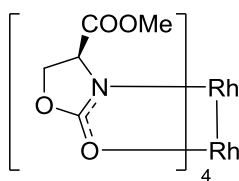

$Rh_2(4S-MEOX)_4$

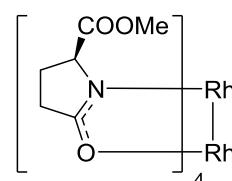

$Rh_2(5S-MEPY)_4$

Figure SI-1 The Structures of Rh Catalyst

## The X-ray crystal structure of 3ba

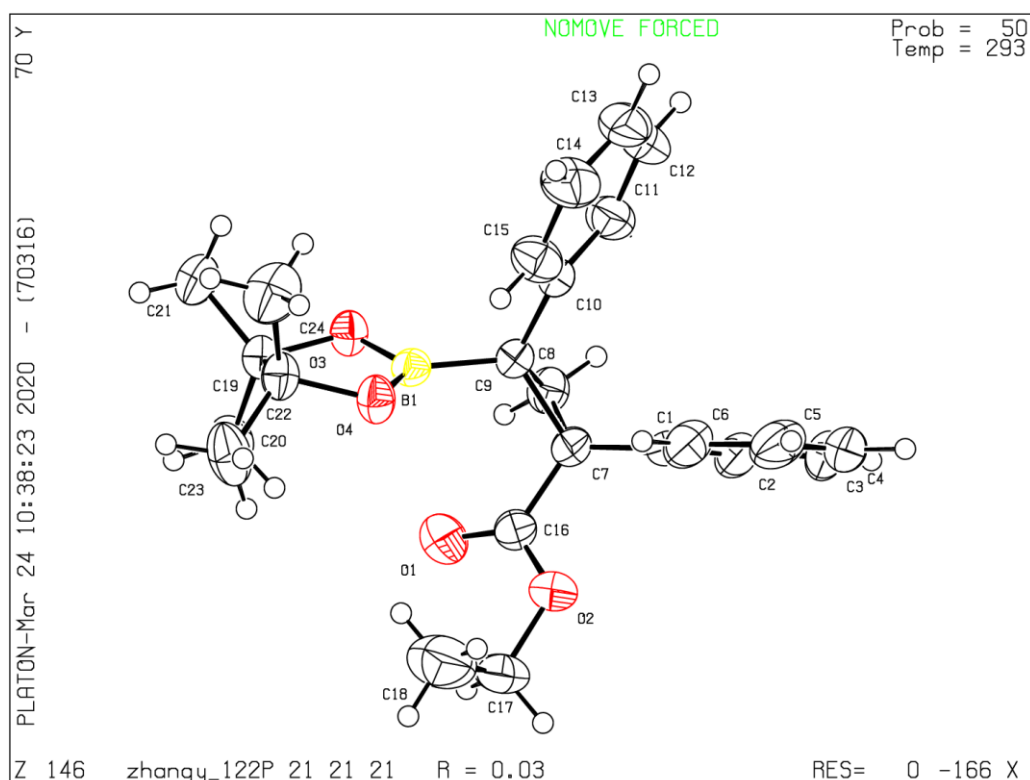

Figure SI-2 The X-ray crystal structure of 3ba

Single crystals of  $C_{24}H_{29}BO_4$  were obtained from recrystallization of 3ba in methylene chloride. A suitable crystal was selected and intensity data were collected on a SuperNova (Dual,Cu at zero, Eos) diffractometer. The crystal was kept at 292.55(14) K during data collection. Using Olex2<sup>[2]</sup>, the structure was solved with the ShelXS<sup>[3]</sup> structure solution program using Direct Methods and refined with the ShelXL<sup>[4]</sup> refinement package using Least Squares minimisation.

### REFERENCES:

- [2]. Dolomanov, O. V., Bourhis, L. J., Gildea, R.J, Howard, J. A. K., Puschmann, H. *J. Appl. Cryst.*, **2009**, *42*, 339.  
 [3]. Sheldrick, G. M., *Acta Cryst.*, **2008**, *A64*, 112.  
 [4]. Sheldrick, G. M. *Acta Cryst.*, **2015**, *C71*, 3.

Crystal structure determination of 3ba

**Crystal Data** for  $C_{24}H_{29}BO_4$  ( $M = 392.28$  g/mol): orthorhombic, space group  $P2_12_12_1$  (no. 19),  $a = 6.48035(14)$  Å,  $b = 17.3087(3)$  Å,  $c = 19.7454(4)$  Å,  $V = 2214.77(8)$  Å<sup>3</sup>,  $Z = 4$ ,  $T = 292.55(14)$  K,  $\mu$  (CuK  $\alpha$ ) = 0.620 mm<sup>-1</sup>,  $D_{calc} = 1.176$  g/cm<sup>3</sup>, 6999 reflections measured ( $10.32^\circ \leq 2\theta \leq 133.08^\circ$ ), 3762 unique ( $R_{int} = 0.0198$ ,  $R_{sigma} = 0.0287$ ) which were used in all calculations. The final  $R_1$  was 0.0344 ( $> 2\sigma(I)$ ) and  $wR_2$  was 0.0893 (all data).

Table 1 Crystal data and structure refinement for 3ba.

|                     |                    |
|---------------------|--------------------|
| Identification code | 3ba                |
| Empirical formula   | $C_{24}H_{29}BO_4$ |
| Formula weight      | 392.28             |

|                                             |                                                               |
|---------------------------------------------|---------------------------------------------------------------|
| Temperature/K                               | 292.55(14)                                                    |
| Crystal system                              | orthorhombic                                                  |
| Space group                                 | P2 <sub>1</sub> 2 <sub>1</sub> 2 <sub>1</sub>                 |
| a/Å                                         | 6.48035(14)                                                   |
| b/Å                                         | 17.3087(3)                                                    |
| c/Å                                         | 19.7454(4)                                                    |
| α/°                                         | 90.00                                                         |
| β/°                                         | 90.00                                                         |
| γ/°                                         | 90.00                                                         |
| Volume/Å <sup>3</sup>                       | 2214.77(8)                                                    |
| Z                                           | 4                                                             |
| ρ <sub>calc</sub> /cm <sup>3</sup>          | 1.176                                                         |
| μ/mm <sup>-1</sup>                          | 0.620                                                         |
| F(000)                                      | 840.0                                                         |
| Crystal size/mm <sup>3</sup>                | 0.21 × 0.15 × 0.14                                            |
| Radiation                                   | CuKα (λ = 1.54184)                                            |
| 2θ range for data collection/°              | 10.32 to 133.08                                               |
| Index ranges                                | -7 ≤ h ≤ 4, -20 ≤ k ≤ 20, -23 ≤ l ≤ 17                        |
| Reflections collected                       | 6999                                                          |
| Independent reflections                     | 3762 [R <sub>int</sub> = 0.0198, R <sub>sigma</sub> = 0.0287] |
| Data/restraints/parameters                  | 3762/0/267                                                    |
| Goodness-of-fit on F <sup>2</sup>           | 1.048                                                         |
| Final R indexes [I ≥ 2σ (I)]                | R <sub>1</sub> = 0.0344, wR <sub>2</sub> = 0.0874             |
| Final R indexes [all data]                  | R <sub>1</sub> = 0.0367, wR <sub>2</sub> = 0.0893             |
| Largest diff. peak/hole / e Å <sup>-3</sup> | 0.14/-0.12                                                    |
| Flack parameter                             | -0.14(17)                                                     |

Table 2 Fractional Atomic Coordinates ( $\times 10^4$ ) and Equivalent Isotropic Displacement Parameters ( $\text{\AA}^2 \times 10^3$ ) for 3ba.  $U_{\text{eq}}$  is defined as 1/3 of the trace of the orthogonalised  $U_{\text{ij}}$  tensor.

| Atom | x           | y          | z           | U(eq)   |
|------|-------------|------------|-------------|---------|
| O1   | -928(3)     | -4591.9(8) | -6918.8(6)  | 69.4(4) |
| O2   | 521(2)      | -5289.6(7) | -7746.5(6)  | 60.3(3) |
| O3   | -1268.9(16) | -2656.0(6) | -6768.5(5)  | 39.3(2) |
| O4   | 1769.4(16)  | -3177.4(6) | -7123.4(5)  | 42.7(3) |
| C1   | -1468(3)    | -4520.0(8) | -8778.4(8)  | 41.7(3) |
| C2   | -3208(3)    | -4833.1(9) | -9078.2(10) | 53.8(4) |

|     |          |             |              |         |
|-----|----------|-------------|--------------|---------|
| C3  | -3165(4) | -5093.4(12) | -9742.8(11)  | 72.9(7) |
| C4  | -1383(5) | -5046.1(11) | -10112.2(10) | 74.3(7) |
| C5  | 365(5)   | -4752.6(11) | -9819.5(11)  | 73.1(7) |
| C6  | 333(3)   | -4491.6(10) | -9151.0(9)   | 57.6(5) |
| C7  | -1568(2) | -4232.2(8)  | -8061.1(8)   | 40.2(3) |
| C8  | -3416(2) | -3765.3(9)  | -7841.9(8)   | 43.8(3) |
| C9  | -1400(2) | -3347.8(8)  | -7913.9(7)   | 36.1(3) |
| C10 | -1059(3) | -2802.6(8)  | -8496.2(7)   | 37.9(3) |
| C11 | -2660(3) | -2522.3(11) | -8886.9(10)  | 56.1(4) |
| C12 | -2288(4) | -1991.3(12) | -9400.1(11)  | 69.2(6) |
| C13 | -342(4)  | -1736.5(11) | -9528.4(10)  | 69.8(6) |
| C14 | 1281(4)  | -1997.9(12) | -9137.4(10)  | 67.4(5) |
| C15 | 921(3)   | -2532.3(11) | -8625.9(9)   | 53.5(4) |
| C16 | -646(3)  | -4716.3(9)  | -7510.0(8)   | 46.6(4) |
| C17 | 1581(4)  | -5776.3(10) | -7246.7(12)  | 70.1(6) |
| C18 | 3593(4)  | -5444.0(16) | -7061.7(15)  | 97.4(9) |
| C19 | 153(2)   | -2549.8(9)  | -6203.0(7)   | 38.0(3) |
| C20 | -400(3)  | -3161(1)    | -5680.9(8)   | 52.3(4) |
| C21 | -167(3)  | -1746.8(10) | -5918.1(9)   | 56.1(4) |
| C22 | 2308(2)  | -2696.0(9)  | -6539.5(8)   | 41.8(3) |
| C23 | 3839(3)  | -3130.9(14) | -6109.4(9)   | 64.2(5) |
| C24 | 3283(3)  | -1968.0(13) | -6829.7(12)  | 72.2(6) |
| B1  | -272(3)  | -3083.2(9)  | -7245.2(8)   | 35.3(3) |

Table 3 Anisotropic Displacement Parameters ( $\text{\AA}^2 \times 10^3$ ) for 3ba. The Anisotropic displacement factor exponent takes the form:  $-2 \pi^2 [h^2 a^{*2} U_{11} + 2hka^* b^* U_{12} + \dots]$ .

| Atom | $U_{11}$  | $U_{22}$ | $U_{33}$ | $U_{23}$ | $U_{13}$  | $U_{12}$ |
|------|-----------|----------|----------|----------|-----------|----------|
| O1   | 100.9(11) | 64.0(8)  | 43.2(7)  | 5.4(6)   | -2.0(7)   | 3.3(8)   |
| O2   | 85.1(9)   | 41.5(6)  | 54.3(7)  | 5.4(5)   | -12.1(7)  | 10.6(6)  |
| O3   | 35.0(5)   | 46.4(6)  | 36.5(5)  | -6.2(4)  | -1.7(4)   | 0.6(4)   |
| O4   | 38.8(5)   | 53.2(6)  | 36.2(5)  | -9.0(5)  | -0.6(4)   | 3.5(5)   |
| C1   | 55.8(9)   | 27.2(6)  | 42.1(8)  | 0.2(6)   | -5.5(7)   | 2.1(6)   |
| C2   | 60.6(11)  | 40.5(8)  | 60.3(10) | -11.5(8) | -13.9(9)  | 4.2(8)   |
| C3   | 101.5(19) | 51.7(11) | 65.6(13) | -21.0(9) | -35.0(13) | 15.7(11) |
| C4   | 132(2)    | 46.7(10) | 44.3(10) | -8.1(8)  | -14.0(13) | 15.7(13) |
| C5   | 112.4(19) | 47(1)    | 59.8(11) | -3.6(9)  | 26.3(12)  | 0.6(11)  |
| C6   | 70.6(12)  | 44.1(8)  | 58.3(10) | -7.2(8)  | 8.9(9)    | -4.7(8)  |



|     |           |           |          |           |           |           |
|-----|-----------|-----------|----------|-----------|-----------|-----------|
| C7  | 47.2(8)   | 32.7(7)   | 40.8(8)  | -1.2(6)   | -2.9(7)   | -5.6(6)   |
| C8  | 40.9(8)   | 45.7(8)   | 44.8(8)  | -4.1(7)   | 0.6(7)    | -5.9(7)   |
| C9  | 39.3(7)   | 32.8(7)   | 36.1(7)  | -2.5(6)   | -1.2(6)   | -1.1(6)   |
| C10 | 48.3(8)   | 31.1(6)   | 34.2(7)  | -4.8(6)   | -2.9(6)   | 2.0(6)    |
| C11 | 59(1)     | 48.6(8)   | 60.8(11) | 8.9(8)    | -16.0(9)  | -2.6(8)   |
| C12 | 89.9(15)  | 59.2(11)  | 58.5(12) | 18.4(10)  | -20.9(11) | 3.7(11)   |
| C13 | 109.3(18) | 51.8(10)  | 48.3(10) | 14.0(8)   | 7.0(11)   | 3.7(11)   |
| C14 | 73.2(13)  | 65.5(11)  | 63.5(12) | 16.4(10)  | 17.9(10)  | -3.4(11)  |
| C15 | 51.7(9)   | 58.0(9)   | 50.8(10) | 9.1(8)    | 5.4(8)    | 3.9(8)    |
| C16 | 60.9(10)  | 35.5(7)   | 43.4(9)  | 4.5(6)    | -5.8(7)   | -12.3(7)  |
| C17 | 92.5(15)  | 43.4(9)   | 74.3(13) | 16.6(9)   | -21.8(12) | -0.2(10)  |
| C18 | 92.1(18)  | 79.2(15)  | 121(2)   | 26.1(15)  | -32.6(17) | -4.2(14)  |
| C19 | 38.6(7)   | 41.6(7)   | 33.8(7)  | -4.5(6)   | -2.0(6)   | -2.2(6)   |
| C20 | 55.1(9)   | 61.1(10)  | 40.7(8)  | 4.3(8)    | 2.7(7)    | -7.9(9)   |
| C21 | 66.9(12)  | 50.8(9)   | 50.6(9)  | -14.2(8)  | 1.2(9)    | 2.4(8)    |
| C22 | 38.9(7)   | 48.7(8)   | 37.8(8)  | -6.7(7)   | -1.7(6)   | -6.3(6)   |
| C23 | 43.0(9)   | 101.0(15) | 48.8(10) | -10.8(10) | -9.2(8)   | 12.8(10)  |
| C24 | 64.4(12)  | 72.4(13)  | 79.9(13) | -3.8(11)  | 17.2(11)  | -29.1(11) |
| B1  | 39.2(8)   | 31.8(7)   | 35.0(8)  | 1.3(6)    | 2.0(7)    | -3.5(6)   |

Table 4 Bond Lengths for 3ba.

| Atom | Atom | Length/Å   | Atom | Atom | Length/Å |
|------|------|------------|------|------|----------|
| O1   | C16  | 1.201(2)   | C7   | C16  | 1.498(2) |
| O2   | C16  | 1.332(2)   | C8   | C9   | 1.500(2) |
| O2   | C17  | 1.468(2)   | C9   | C10  | 1.504(2) |
| O3   | C19  | 1.4594(17) | C9   | B1   | 1.577(2) |
| O3   | B1   | 1.3604(19) | C10  | C11  | 1.381(2) |
| O4   | C22  | 1.4648(17) | C10  | C15  | 1.390(2) |
| O4   | B1   | 1.354(2)   | C11  | C12  | 1.389(3) |
| C1   | C2   | 1.384(2)   | C12  | C13  | 1.360(3) |
| C1   | C6   | 1.380(3)   | C13  | C14  | 1.381(3) |
| C1   | C7   | 1.503(2)   | C14  | C15  | 1.389(3) |
| C2   | C3   | 1.388(3)   | C17  | C18  | 1.471(4) |
| C3   | C4   | 1.368(4)   | C19  | C20  | 1.520(2) |
| C4   | C5   | 1.369(4)   | C19  | C21  | 1.514(2) |
| C5   | C6   | 1.395(3)   | C19  | C22  | 1.567(2) |
| C7   | C8   | 1.508(2)   | C22  | C23  | 1.507(2) |

C7 C9 1.5618(19) C22 C24 1.522(3)

Table 5 Bond Angles for 3ba.

| Atom | Atom | Atom | Angle <sup>o</sup> | Atom | Atom | Atom | Angle <sup>o</sup> |
|------|------|------|--------------------|------|------|------|--------------------|
| C16  | O2   | C17  | 117.22(15)         | C15  | C10  | C9   | 119.20(14)         |
| B1   | O3   | C19  | 107.33(11)         | C10  | C11  | C12  | 120.61(19)         |
| B1   | O4   | C22  | 107.70(12)         | C13  | C12  | C11  | 120.79(19)         |
| C2   | C1   | C7   | 119.85(16)         | C12  | C13  | C14  | 119.72(18)         |
| C6   | C1   | C2   | 118.35(16)         | C13  | C14  | C15  | 119.8(2)           |
| C6   | C1   | C7   | 121.80(15)         | C14  | C15  | C10  | 120.85(18)         |
| C1   | C2   | C3   | 121.0(2)           | O1   | C16  | O2   | 124.11(17)         |
| C4   | C3   | C2   | 120.1(2)           | O1   | C16  | C7   | 123.01(17)         |
| C3   | C4   | C5   | 119.69(18)         | O2   | C16  | C7   | 112.87(14)         |
| C4   | C5   | C6   | 120.5(2)           | O2   | C17  | C18  | 110.93(18)         |
| C1   | C6   | C5   | 120.4(2)           | O3   | C19  | C20  | 106.41(12)         |
| C1   | C7   | C8   | 118.84(13)         | O3   | C19  | C21  | 108.26(13)         |
| C1   | C7   | C9   | 119.82(12)         | O3   | C19  | C22  | 102.59(10)         |
| C8   | C7   | C9   | 58.46(10)          | C20  | C19  | C22  | 112.66(13)         |
| C16  | C7   | C1   | 118.81(13)         | C21  | C19  | C20  | 110.78(13)         |
| C16  | C7   | C8   | 114.10(14)         | C21  | C19  | C22  | 115.34(14)         |
| C16  | C7   | C9   | 112.66(12)         | O4   | C22  | C19  | 102.32(11)         |
| C9   | C8   | C7   | 62.56(10)          | O4   | C22  | C23  | 108.43(14)         |
| C7   | C9   | B1   | 118.20(12)         | O4   | C22  | C24  | 105.88(14)         |
| C8   | C9   | C7   | 58.98(10)          | C23  | C22  | C19  | 115.35(14)         |
| C8   | C9   | C10  | 120.19(13)         | C23  | C22  | C24  | 110.64(17)         |
| C8   | C9   | B1   | 117.67(13)         | C24  | C22  | C19  | 113.34(15)         |
| C10  | C9   | C7   | 118.89(12)         | O3   | B1   | C9   | 121.12(13)         |
| C10  | C9   | B1   | 112.93(11)         | O4   | B1   | O3   | 113.99(13)         |
| C11  | C10  | C9   | 122.49(15)         | O4   | B1   | C9   | 124.51(14)         |
| C11  | C10  | C15  | 118.21(15)         |      |      |      |                    |

Table 6 Torsion Angles for 3ba.

| A  | B   | C   | D   | Angle <sup>o</sup> | A  | B   | C   | D   | Angle <sup>o</sup> |
|----|-----|-----|-----|--------------------|----|-----|-----|-----|--------------------|
| O3 | C19 | C22 | O4  | -24.04(14)         | C9 | C7  | C16 | O1  | 44.1(2)            |
| O3 | C19 | C22 | C23 | -141.52(15)        | C9 | C7  | C16 | O2  | -135.47(14)        |
| O3 | C19 | C22 | C24 | 89.49(16)          | C9 | C10 | C11 | C12 | 176.97(17)         |

|               |             |                 |             |
|---------------|-------------|-----------------|-------------|
| C1 C2 C3 C4   | 0.3(3)      | C9 C10 C15 C14  | -176.72(16) |
| C1 C7 C8 C9   | -109.15(15) | C10 C9 B1 O3    | 94.10(16)   |
| C1 C7 C9 C8   | 107.49(17)  | C10 C9 B1 O4    | -78.38(18)  |
| C1 C7 C9 C10  | -2.3(2)     | C10 C11 C12 C13 | 0.0(3)      |
| C1 C7 C9 B1   | -145.50(15) | C11 C10 C15 C14 | -0.4(3)     |
| C1 C7 C16 O1  | -168.28(17) | C11 C12 C13 C14 | -1.1(3)     |
| C1 C7 C16 O2  | 12.2(2)     | C12 C13 C14 C15 | 1.4(3)      |
| C2 C1 C6 C5   | 1.9(3)      | C13 C14 C15 C10 | -0.7(3)     |
| C2 C1 C7 C8   | -43.11(19)  | C15 C10 C11 C12 | 0.7(3)      |
| C2 C1 C7 C9   | -111.24(17) | C16 O2 C17 C18  | -87.3(3)    |
| C2 C1 C7 C16  | 103.48(18)  | C16 C7 C8 C9    | 102.75(14)  |
| C2 C3 C4 C5   | 1.1(3)      | C16 C7 C9 C8    | -105.24(15) |
| C3 C4 C5 C6   | -0.9(3)     | C16 C7 C9 C10   | 144.98(15)  |
| C4 C5 C6 C1   | -0.6(3)     | C16 C7 C9 B1    | 1.8(2)      |
| C6 C1 C2 C3   | -1.7(2)     | C17 O2 C16 O1   | -2.5(3)     |
| C6 C1 C7 C8   | 137.73(16)  | C17 O2 C16 C7   | 177.09(16)  |
| C6 C1 C7 C9   | 69.6(2)     | C19 O3 B1 O4    | -10.11(17)  |
| C6 C1 C7 C16  | -75.7(2)    | C19 O3 B1 C9    | 176.67(12)  |
| C7 C1 C2 C3   | 179.11(16)  | C20 C19 C22 O4  | 89.97(14)   |
| C7 C1 C6 C5   | -178.99(16) | C20 C19 C22 C23 | -27.52(19)  |
| C7 C8 C9 C10  | 107.60(14)  | C20 C19 C22 C24 | -156.50(15) |
| C7 C8 C9 B1   | -107.90(14) | C21 C19 C22 O4  | -141.49(13) |
| C7 C9 C10 C11 | 84.44(19)   | C21 C19 C22 C23 | 101.03(18)  |
| C7 C9 C10 C15 | -99.36(17)  | C21 C19 C22 C24 | -27.96(19)  |
| C7 C9 B1 O3   | -120.60(15) | C22 O4 B1 O3    | -6.76(17)   |
| C7 C9 B1 O4   | 66.9(2)     | C22 O4 B1 C9    | 166.19(13)  |
| C8 C7 C9 C10  | -109.78(16) | B1 O3 C19 C20   | -97.45(14)  |
| C8 C7 C9 B1   | 107.00(15)  | B1 O3 C19 C21   | 143.43(14)  |
| C8 C7 C16 O1  | -20.2(2)    | B1 O3 C19 C22   | 21.05(14)   |
| C8 C7 C16 O2  | 160.27(13)  | B1 O4 C22 C19   | 19.13(15)   |
| C8 C9 C10 C11 | 15.5(2)     | B1 O4 C22 C23   | 141.45(14)  |
| C8 C9 C10 C15 | -168.27(14) | B1 O4 C22 C24   | -99.80(16)  |
| C8 C9 B1 O3   | -52.88(19)  | B1 C9 C10 C11   | -130.52(16) |
| C8 C9 B1 O4   | 134.65(15)  | B1 C9 C10 C15   | 45.68(19)   |

Table 7 Hydrogen Atom Coordinates ( $\text{\AA} \times 10^4$ ) and Isotropic Displacement Parameters ( $\text{\AA}^2 \times 10^3$ ) for 3ba.

| Atom | x     | y     | z      | U(eq) |
|------|-------|-------|--------|-------|
| H2   | -4425 | -4869 | -8830  | 65    |
| H3   | -4349 | -5300 | -9937  | 87    |
| H4   | -1359 | -5213 | -10560 | 89    |
| H5   | 1582  | -4727 | -10068 | 88    |
| H6   | 1531  | -4297 | -8955  | 69    |
| H8A  | -4473 | -3663 | -8178  | 53    |
| H8B  | -3936 | -3849 | -7387  | 53    |
| H11  | -4001 | -2691 | -8806  | 67    |
| H12  | -3382 | -1808 | -9659  | 83    |
| H13  | -105  | -1388 | -9878  | 84    |
| H14  | 2610  | -1817 | -9216  | 81    |
| H15  | 2020  | -2712 | -8367  | 64    |
| H17A | 1782  | -6289 | -7433  | 84    |
| H17B | 731   | -5824 | -6844  | 84    |
| H18A | 4449  | -5412 | -7457  | 146   |
| H18B | 4248  | -5767 | -6730  | 146   |
| H18C | 3394  | -4936 | -6877  | 146   |
| H20A | -1792 | -3082 | -5530  | 78    |
| H20B | 523   | -3123 | -5302  | 78    |
| H2oC | -279  | -3664 | -5881  | 78    |
| H21A | 10    | -1372 | -6272  | 84    |
| H21B | 822   | -1653 | -5566  | 84    |
| H21C | -1536 | -1706 | -5736  | 84    |
| H23A | 3325  | -3641 | -6021  | 96    |
| H23B | 4034  | -2863 | -5688  | 96    |
| H23C | 5132  | -3165 | -6344  | 96    |
| H24A | 4409  | -2107 | -7121  | 108   |
| H24B | 3786  | -1651 | -6467  | 108   |
| H24C | 2269  | -1687 | -7084  | 108   |

## DFT Study

### Details of DFT calculations

We have performed a DFT mechanistic study using Gaussian 09. The structures of Rh-carbene were optimized and characterized to be energy minima at the B3LYP/BSI level in the gas phase, where BSI denotes a basis set 6-31G (d) for atoms H, C, N, and O, SDD for atom Rh.

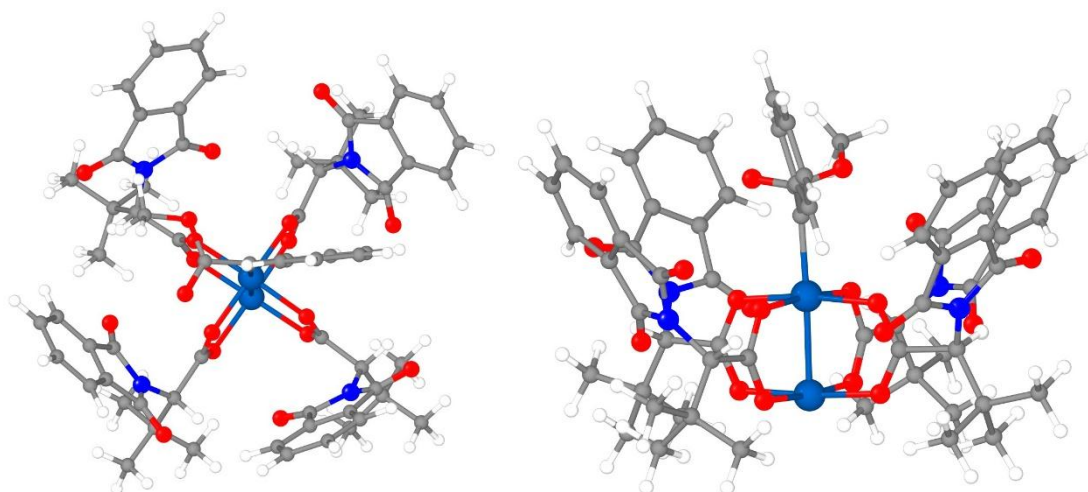

Figure SI-3 The Top view of Rh-carbenoid and the side view of Rh-carbenoid

Rh-carbenoid:

|    |             |             |             |
|----|-------------|-------------|-------------|
| Rh | 0.03543400  | 0.07072400  | -0.08970800 |
| Rh | 0.07644800  | -0.00689300 | -2.55783200 |
| N  | -4.51231200 | 1.51534900  | -0.33301400 |
| N  | 2.20283000  | 4.17458700  | -0.35063900 |
| N  | 4.34090400  | -1.76059200 | -0.08088800 |
| N  | -1.91225900 | -4.19902400 | -0.17580000 |
| O  | -1.99193000 | 0.51176100  | -0.25254700 |
| O  | -1.94550900 | 0.40352900  | -2.51438200 |
| O  | -3.17846100 | 3.38215000  | -0.77202000 |
| O  | -5.91739900 | 0.01787100  | 0.78107100  |
| O  | 0.52747500  | 2.06899300  | -0.27329700 |
| O  | 0.53598200  | 2.01615500  | -2.53783200 |
| O  | 3.58410700  | 2.42054100  | -1.01904300 |
| O  | 1.15830000  | 5.77626000  | 0.98652300  |
| O  | 2.03775400  | -0.39833700 | -0.19606200 |
| O  | 2.08718400  | -0.44929900 | -2.45994500 |
| O  | 2.79693000  | -3.43244900 | -0.60541500 |
| O  | 5.79151700  | -0.40283600 | 1.14456700  |
| O  | -0.40865800 | -1.94406500 | -0.13933400 |
| O  | -0.34695700 | -2.02588800 | -2.40379900 |
| O  | -0.84602800 | -5.64477900 | 1.31432300  |
| O  | -3.37715500 | -2.59670200 | -1.02271500 |
| C  | -2.53700000 | 0.52888600  | -1.40819100 |
| C  | -4.07815200 | 0.61013600  | -1.40142000 |
| H  | -4.38030700 | -0.38289800 | -1.04714500 |
| C  | -4.81557900 | 0.83704800  | -2.76948500 |
| C  | -4.60004300 | -0.40569300 | -3.66284400 |
| H  | -5.19507600 | -0.30165600 | -4.57824500 |
| H  | -4.92084600 | -1.32191200 | -3.15391900 |
| H  | -3.55277400 | -0.52361600 | -3.94439100 |

|   |             |            |             |
|---|-------------|------------|-------------|
| C | -4.35340400 | 2.10266600 | -3.51762000 |
| H | -4.91369400 | 2.19088500 | -4.45676800 |
| H | -3.28880300 | 2.05944100 | -3.75827000 |
| H | -4.53360800 | 3.01146200 | -2.93576000 |
| C | -6.33012600 | 0.95138000 | -2.48536800 |
| H | -6.87564600 | 0.99155800 | -3.43492100 |
| H | -6.57666200 | 1.86214800 | -1.92817000 |
| H | -6.70353900 | 0.09216800 | -1.91707400 |
| C | -4.02772900 | 2.81447600 | -0.11180600 |
| C | -4.74953500 | 3.32153200 | 1.09325700  |
| C | -4.70265800 | 4.56411700 | 1.70929900  |
| H | -4.07209900 | 5.35746000 | 1.31904000  |
| C | -5.50678500 | 4.75224000 | 2.84202500  |
| H | -5.50203600 | 5.71278400 | 3.34959900  |
| C | -6.32199900 | 3.72185600 | 3.32931000  |
| H | -6.93437200 | 3.89822700 | 4.20909800  |
| C | -6.36292700 | 2.47172400 | 2.69692300  |
| H | -6.99385800 | 1.66782800 | 3.06315400  |
| C | -5.56612600 | 2.29838100 | 1.57441300  |
| C | -5.40021600 | 1.11470800 | 0.68135200  |
| C | 0.71046700  | 2.58537500 | -1.42787000 |
| C | 1.14796800  | 4.06869000 | -1.36744200 |
| H | 0.29836400  | 4.59149700 | -0.91042400 |
| C | 1.45166700  | 4.81417700 | -2.70769000 |
| C | 0.14838400  | 4.88045900 | -3.53448500 |
| H | 0.31465000  | 5.48730200 | -4.43234100 |
| H | -0.66289300 | 5.34932000 | -2.96309200 |
| H | -0.18244600 | 3.88853700 | -3.84884000 |
| C | 1.87206400  | 6.25904400 | -2.35913500 |
| H | 1.99142400  | 6.83922700 | -3.28127000 |
| H | 2.82885900  | 6.28576500 | -1.82633700 |
| H | 1.12422700  | 6.76163500 | -1.73526900 |
| C | 2.56795800  | 4.15733100 | -3.54177600 |
| H | 2.72299300  | 4.73964600 | -4.45868100 |
| H | 2.31044800  | 3.13429800 | -3.82335300 |
| H | 3.51736900  | 4.13046400 | -2.99884700 |
| C | 3.27695200  | 3.27752200 | -0.21182900 |
| C | 3.91818400  | 3.59445100 | 1.09419800  |
| C | 5.01056000  | 3.00695900 | 1.71788100  |
| H | 5.53181900  | 2.16588800 | 1.27095000  |
| C | 5.38392300  | 3.52398900 | 2.96643000  |
| H | 6.23125500  | 3.09092500 | 3.49035500  |
| C | 4.68073900  | 4.58391000 | 3.55461900  |
| H | 4.99867300  | 4.96170300 | 4.52254000  |

|   |             |             |             |
|---|-------------|-------------|-------------|
| C | 3.56900900  | 5.15573400  | 2.92086000  |
| H | 3.00778600  | 5.96698300  | 3.37423200  |
| C | 3.20517000  | 4.63870900  | 1.68585000  |
| C | 2.06065400  | 4.98419800  | 0.79469200  |
| C | 2.61803000  | -0.55798900 | -1.32021200 |
| C | 4.13037000  | -0.83772300 | -1.20119500 |
| H | 4.53939700  | 0.11375300  | -0.84180100 |
| C | 4.92944600  | -1.20377500 | -2.49842100 |
| C | 4.92231800  | 0.01825800  | -3.44405500 |
| H | 5.56906100  | -0.18421200 | -4.30638200 |
| H | 5.30436000  | 0.91346600  | -2.93940000 |
| H | 3.91867700  | 0.23883600  | -3.81146300 |
| C | 4.37772700  | -2.43812400 | -3.23695100 |
| H | 4.98338900  | -2.62466300 | -4.13279600 |
| H | 3.34188900  | -2.28796500 | -3.54913500 |
| H | 4.41683700  | -3.33687400 | -2.61450800 |
| C | 6.39405700  | -1.47795300 | -2.09086200 |
| H | 7.00249900  | -1.62672400 | -2.99026500 |
| H | 6.48450000  | -2.38223500 | -1.47902400 |
| H | 6.82202100  | -0.64188000 | -1.52613300 |
| C | 5.13792300  | -1.42296500 | 1.02795700  |
| C | 5.01156400  | -2.55850200 | 1.98581600  |
| C | 5.62516300  | -2.77249400 | 3.21099200  |
| H | 6.32711900  | -2.05097400 | 3.61734300  |
| C | 5.30145200  | -3.95123500 | 3.89648600  |
| H | 5.76331300  | -4.15665300 | 4.85826200  |
| C | 4.39097600  | -4.87216600 | 3.36123400  |
| H | 4.16155300  | -5.77809300 | 3.91551800  |
| C | 3.77459100  | -4.64407300 | 2.12320400  |
| H | 3.06570600  | -5.34927900 | 1.69963100  |
| C | 4.10457200  | -3.47451100 | 1.45413600  |
| C | 3.62927200  | -2.95151200 | 0.14111000  |
| C | -0.50373500 | -2.54093700 | -1.26422300 |
| C | -0.80199000 | -4.05187000 | -1.12800400 |
| H | 0.06523300  | -4.45134800 | -0.58883400 |
| C | -0.95115300 | -4.90604200 | -2.42930900 |
| C | 0.38898100  | -4.86960200 | -3.19720100 |
| H | 0.34605700  | -5.57010400 | -4.03974600 |
| H | 1.22545900  | -5.16820300 | -2.55393200 |
| H | 0.60267500  | -3.87374300 | -3.58977800 |
| C | -2.09639800 | -4.43485000 | -3.34491300 |
| H | -3.06616400 | -4.48819600 | -2.84051000 |
| H | -2.14410500 | -5.08451300 | -4.22779500 |
| H | -1.94565000 | -3.40699100 | -3.68090700 |

|   |             |             |             |
|---|-------------|-------------|-------------|
| C | -1.21929600 | -6.36777200 | -2.00692600 |
| H | -2.18738500 | -6.47644700 | -1.50556900 |
| H | -0.44403100 | -6.74446400 | -1.33034100 |
| H | -1.23565800 | -7.00832400 | -2.89608300 |
| C | -1.79910900 | -4.95383700 | 1.00613400  |
| C | -3.04817800 | -4.69640700 | 1.78026100  |
| C | -3.47702600 | -5.21603800 | 2.99349800  |
| H | -2.89123700 | -5.96291200 | 3.52089600  |
| C | -4.69207200 | -4.73805500 | 3.50392700  |
| H | -5.06380600 | -5.12195500 | 4.44997100  |
| C | -5.43272500 | -3.76603300 | 2.81834400  |
| H | -6.36353300 | -3.40566600 | 3.24712300  |
| C | -4.99311600 | -3.24660700 | 1.59230000  |
| H | -5.54578000 | -2.47271500 | 1.06872600  |
| C | -3.79657600 | -3.74077700 | 1.09166400  |
| C | -3.06913000 | -3.40096900 | -0.16292900 |
| C | 0.08167900  | 0.13252300  | 1.92049400  |
| C | -0.23134800 | 1.23904400  | 2.77862300  |
| C | 0.16515500  | 1.24814700  | 4.14704700  |
| C | -0.94533900 | 2.36187900  | 2.27945500  |
| C | -0.12118500 | 2.33090800  | 4.96277400  |
| H | 0.73001100  | 0.41106200  | 4.54383700  |
| C | -1.24159600 | 3.43541900  | 3.11036000  |
| H | -1.26341800 | 2.36482000  | 1.24621000  |
| C | -0.82720200 | 3.42549900  | 4.44524400  |
| H | 0.20102500  | 2.33095700  | 6.00004500  |
| H | -1.78785000 | 4.28596900  | 2.71629300  |
| H | -1.05251000 | 4.27335800  | 5.08700000  |
| C | 0.65055300  | -1.07484000 | 2.57665100  |
| O | 1.84569200  | -1.22344900 | 2.75213900  |
| O | -0.29477300 | -1.95387200 | 2.93954200  |
| C | 0.18557300  | -3.18803300 | 3.51328900  |
| H | -0.70815200 | -3.71594200 | 3.84329000  |
| H | 0.71172500  | -3.77345200 | 2.75749800  |
| H | 0.85229700  | -2.98398700 | 4.35471300  |



### Preparation of Cyclopropylboronates **3**

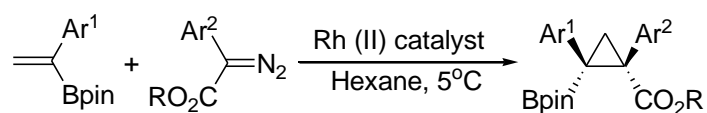

#### General procedure:

In an inert gas atmosphere,  $\text{Rh(II)}$  catalyst (0.2 mol % eq) was added into  $\alpha$ -borylstyrenes **2** (2 eq) and hexane (3 mL) at  $5^\circ\text{C}$ . Stirred for 30 min and then  $\alpha$ -diazoarylacrylates **1** (0.5 mmol) diluted in n-hexane (13 mL) was added dropwise over a period of 1h. The mixture was reacted for additional 30 min and the pure chiral cyclopropylboronates **3** was obtained by flash chromatography.

It should be noted that the solution of  $\alpha$ -diazoarylacrylates **1** in hexane should be very slowly added into the mixture of  $\alpha$ -borylstyrenes **2** and the dirhodium catalyst in all cases, otherwise some by-products would be formed, resulting in moderate yield.

**Methyl (1*S*,2*R*)-1,2-diphenyl-2-(4,4,5,5-tetramethyl-1,3,2-dioxaborolan-2-yl) cyclopropane-1-carboxylate (3aa)**

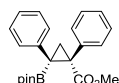

White solid, 99% ee (Daicel OJ-H 0.46\*25 cm, *n*-Hexane : *i*-PrOH 97 : 3, 1 mL/min, 35 °C, 4.2 Mpa,  $t_R$  (minor) = 5.105 min,  $t_R$  (major) = 11.442 min);  $^1\text{H NMR}$  (400 MHz,  $\text{CDCl}_3$ )  $\delta$  7.20 – 7.17 (m, 2H), 7.15 – 7.12 (m, 2H), 7.07 – 6.99 (m, 5H), 6.97 – 6.92 (m, 1H), 3.68 (s, 3H), 2.18 (d,  $J = 4.4$  Hz, 1H), 2.09 (d,  $J = 4.4$  Hz, 1H), 1.25 (s, 6H), 1.24 (s, 6H) ppm.  $^{13}\text{C NMR}$  (100 MHz,  $\text{CDCl}_3$ )  $\delta$  175.2, 137.4, 135.1, 131.5 (2C), 130.1 (2C), 127.6 (2C), 127.4 (2C), 126.8, 126.0, 83.8 (2C), 52.9, 40.3, 25.0 (2C), 24.3 (2C), 21.9 ppm [Note: the carbon attached to boron was not observed due to quadrupole broadening caused by the  $^{11}\text{B}$  nucleus].  $^{11}\text{B NMR}$  (128 MHz,  $\text{CDCl}_3$ )  $\delta$  30.36. **ESI-HR** calcd for  $\text{C}_{23}\text{H}_{27}\text{BO}_4\text{Na}^+$  ( $[\text{M}+\text{Na}]^+$ ) 401.18946, found 401.18979. **IR**  $\tilde{\nu}$  ( $\text{cm}^{-1}$ ) 1709, 1326, 1145. **M. P.** 112.0 – 112.1 °C. **Yield**= 87%.  $[\alpha]_D^{20} = 16.1$  ( $c = 1$ , MeOH) for a 99% ee sample.  $[\alpha]_D^{20} = -9$  ( $c = 1$ ,  $\text{CH}_2\text{Cl}_2$ ) for a 99% ee sample.

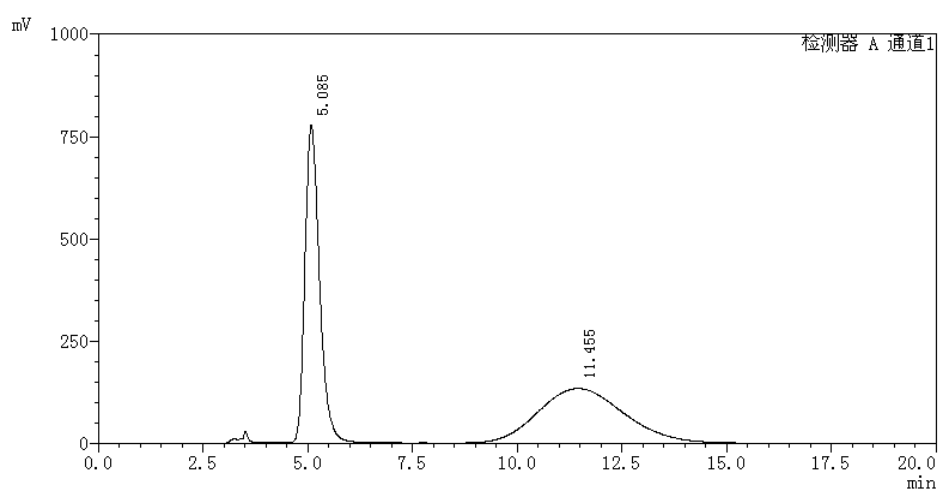

峰表

| 峰# | 保留时间   | 面积       | 高度     | 面积 %    | 高度 %    |
|----|--------|----------|--------|---------|---------|
| 1  | 5.085  | 18399584 | 776441 | 50.018  | 85.402  |
| 2  | 11.455 | 18885933 | 132721 | 49.982  | 14.598  |
| 总计 |        | 37785516 | 909162 | 100.000 | 100.000 |

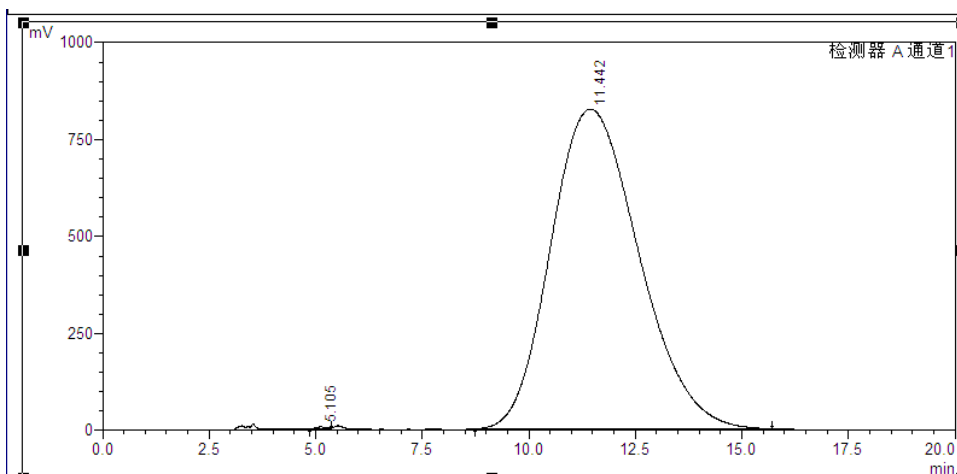

峰表

| 峰# | 保留时间   | 面积        | 高度     | 面积 %    | 高度 %    |
|----|--------|-----------|--------|---------|---------|
| 1  | 5.105  | 124757    | 6153   | 0.105   | 0.740   |
| 2  | 11.442 | 119136258 | 825305 | 99.895  | 99.260  |
| 总计 |        | 119261015 | 831459 | 100.000 | 100.000 |

**Ethyl (1*S*,2*R*)-1, 2-diphenyl-2-(4,4,5,5-tetramethyl-1,3,2-dioxaborolan-2-yl)cyclopropane-1-carboxylate (3ba)**

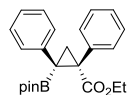

Electronic Supplementary Information (ESI) available: CCDC 1992721 contains the supplementary crystallographic data for this paper. For ESI and crystallographic data in CIF. White solid, 98% ee (Daicel OD-H 0.46\*25 cm, *n*-Hexane : *i*-PrOH 99.9 : 0.1, 1 mL/min, 35 °C, 3.6 Mpa,  $t_R$  (minor) = 17.097 min,  $t_R$  (major) = 18.836 min);  $^1\text{H NMR}$  (400 MHz,  $\text{CDCl}_3$ )  $\delta$  7.18 (d,  $J$  = 7.6 Hz, 2H), 7.12 (d,  $J$  = 8 Hz, 2H), 7.04 – 6.91 (m, 6H), 4.27 – 4.19 (m, 1H), 4.09 – 4.01 (m, 1H), 2.16 (d,  $J$  = 4.0 Hz, 1H), 2.07 (d,  $J$  = 4.0 Hz, 1H), 1.25 (s, 6H), 1.23 (s, 6H), 1.84 (t,  $J$  = 7.2 Hz, 3H) ppm.  $^{13}\text{C NMR}$  (100 MHz,  $\text{CDCl}_3$ )  $\delta$  174.8, 137.6, 135.1, 131.4 (2C), 130.1 (2C), 127.5 (2C), 127.3 (2C), 126.6, 125.9, 83.7 (2C), 61.6, 40.5, 25.0 (2C), 24.8 (2C), 21.8, 14.3 ppm [Note: the carbon attached to boron was not observed due to quadrupole broadening caused by the  $^{11}\text{B}$  nucleus]. **ESI-HR** calcd for  $\text{C}_{24}\text{H}_{29}\text{BO}_4\text{Na}^+$  ( $[\text{M}+\text{Na}]^+$ ) 415.20511, found 415.20502. **IR**  $\tilde{\nu}$  ( $\text{cm}^{-1}$ ) 1706, 1302, 1145. **M. P.** 139.3 – 139.5 °C. **Yield** = 90%.  $[\alpha]_D^{20}$  = 26.0 ( $c$  = 1, MeOH) for a 98% ee sample.

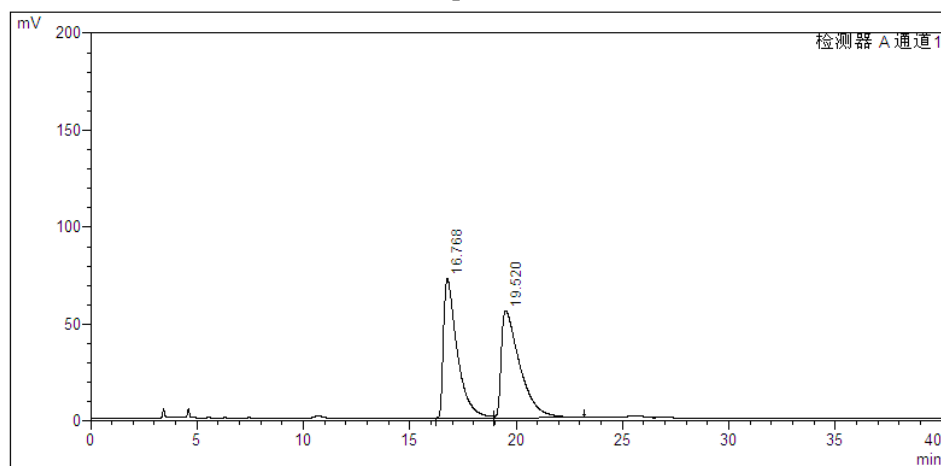

峰表

| 峰# | 保留时间   | 面积      | 高度     | 面积 %    | 高度 %    |
|----|--------|---------|--------|---------|---------|
| 1  | 16.768 | 3230546 | 71534  | 49.293  | 56.459  |
| 2  | 19.520 | 3323265 | 55167  | 50.707  | 43.541  |
| 总计 |        | 6553811 | 126702 | 100.000 | 100.000 |

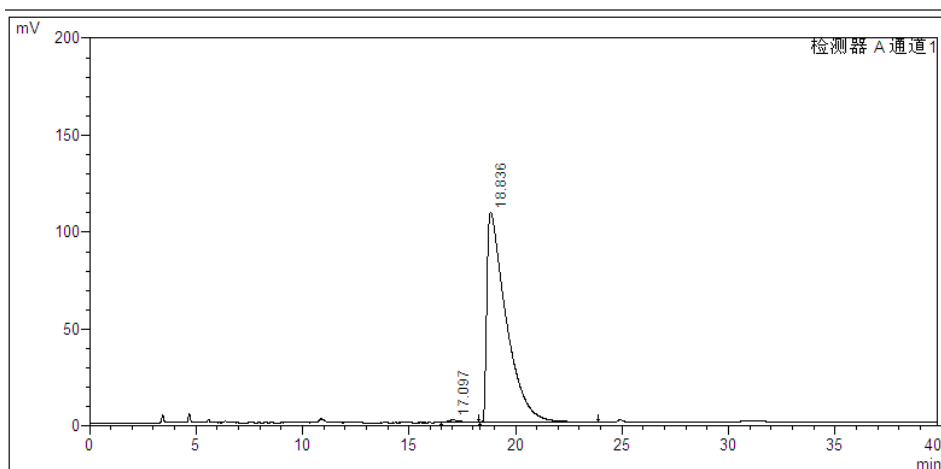

峰表

| 峰# | 保留时间   | 面积      | 高度     | 面积 %    | 高度 %    |
|----|--------|---------|--------|---------|---------|
| 1  | 17.097 | 57824   | 1304   | 0.835   | 1.188   |
| 2  | 18.836 | 6865632 | 108439 | 99.165  | 98.812  |
| 总计 |        | 6923456 | 109742 | 100.000 | 100.000 |

**Benzyl (1*S*,2*R*)-1,2-diphenyl-2-(4,4,5,5-tetramethyl-1,3,2-dioxaborolan-2-yl) cyclopropane-1-carboxylate (3ca)**

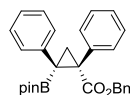

White solid, 99% ee (Daicel OD-H 0.46\*25 cm, *n*-Hexane : *i*-PrOH 99.6 : 0.4, 1 mL/min, 35 °C, 3.9 Mpa,  $t_R$  (minor) = 8.822 min,  $t_R$  (major) = 10.167 min);  $^1\text{H NMR}$  (400 MHz,  $\text{CDCl}_3$ )  $\delta$  7.32 – 7.24 (m, 3H), 7.21 – 7.19 (m, 4H), 7.15 – 7.12 (m, 2H), 7.06 – 7.00 (m, 5H), 6.98 – 6.93 (m, 1H), 5.28 (d,  $J$  = 13.2 Hz, 1H), 5.03 (d,  $J$  = 13.2 Hz, 1H), 2.21 (d,  $J$  = 4.4 Hz, 1H), 2.12 (d,  $J$  = 4.4 Hz, 1H), 1.23 (s, 6H), 1.20 (s, 6H) ppm.  $^{13}\text{C NMR}$  (100 MHz,  $\text{CDCl}_3$ )  $\delta$  174.6, 137.5, 136.3, 134.9, 131.5 (2C), 130.1 (2C), 128.5 (2C), 127.8, 127.6 (2C), 127.3 (4C), 126.7, 126.0, 83.8 (2C), 66.9, 40.5, 25.0 (2C), 24.8 (2C), 22.0 ppm [Note: the carbon attached to boron was not observed due to quadrupole broadening caused by the  $^{11}\text{B}$  nucleus]. **ESI-HR** calcd for  $\text{C}_{29}\text{H}_{31}\text{BO}_4\text{Na}^+$  ( $[\text{M}+\text{Na}]^+$ ) 477.22076, found 477.22070. **IR**  $\tilde{\nu}$  ( $\text{cm}^{-1}$ ) 1710, 1303, 1146. **M. P.** 102.3 – 102.9 °C. **Yield** = 96%.  $[\alpha]_D^{20}$  = 15.8 ( $c$  = 1, MeOH) for a 99% ee sample.

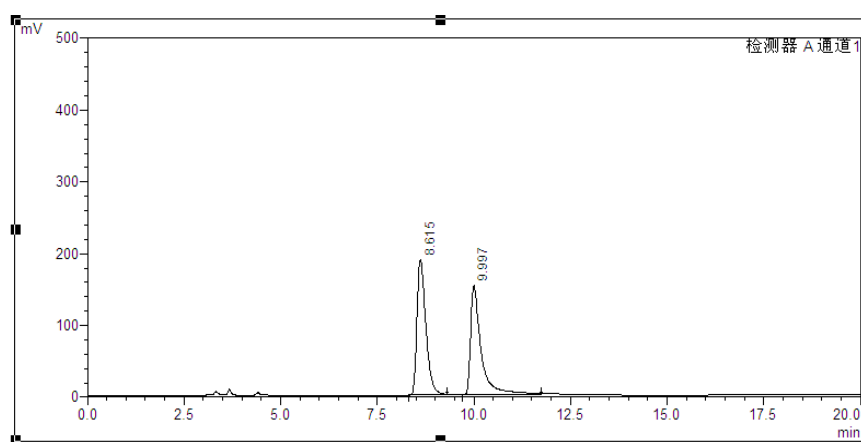

峰表

| 峰# | 保留时间  | 面积      | 高度     | 面积 %    | 高度 %    |
|----|-------|---------|--------|---------|---------|
| 1  | 8.615 | 3025085 | 188233 | 50.556  | 55.228  |
| 2  | 9.997 | 2958491 | 152594 | 49.444  | 44.772  |
| 总计 |       | 5983576 | 340828 | 100.000 | 100.000 |

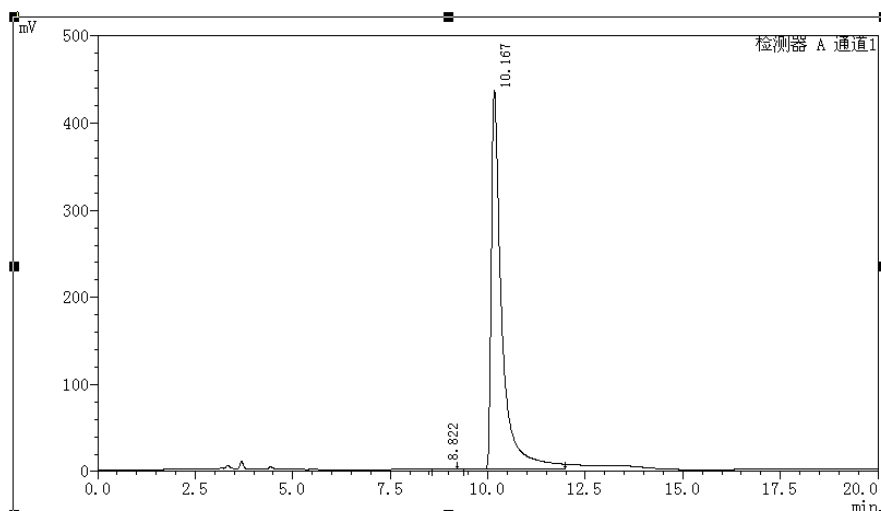

峰表

| 峰# | 保留时间   | 面积      | 高度     | 面积 %    | 高度 %    |
|----|--------|---------|--------|---------|---------|
| 1  | 8.822  | 12619   | 696    | 0.153   | 0.160   |
| 2  | 10.167 | 8244372 | 435130 | 99.847  | 99.840  |
| 总计 |        | 8256991 | 435826 | 100.000 | 100.000 |

**Methyl (1*S*,2*R*)-1-(4-fluorophenyl)-2-phenyl-2-(4,4,5,5-tetramethyl-1,3,2-dioxaborolan-2-yl)cyclopropane-1-carboxylate (3da)**

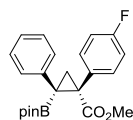

White solid, 99% ee (Daicel OD-H 0.46\*25 cm, *n*-Hexane : *i*-PrOH 99.7 : 0.3, 1 mL/min, 35 °C, 3.9 Mpa,  $t_R$  (major) = 8.459 min,  $t_R$  (minor) = 10.629 min);  $^1\text{H NMR}$  (400 MHz,  $\text{CDCl}_3$ )  $\delta$  7.18 – 7.16 (m, 2H), 7.12 – 7.07(m, 2H ), 7.06 – 7.02 (m, 2H), 6.99 – 6.95 (m, 1H), 6.75 – 6.70 (m, 2H), 3.67 (s, 3H), 2.13 (d,  $J$  = 4.4 Hz, 1H), 2.11 (d,  $J$  = 4.4 Hz, 1H), 1.25 (s, 6H), 1.23 (s, 6H) ppm.  $^{13}\text{C NMR}$  (100 MHz,  $\text{CDCl}_3$ )  $\delta$  174.9, 161.6 (F-C,  $J$  = 244 Hz), 137.2, 133.1 (F-C-C-C,  $J$  = 8 Hz, 2 C), 131.0 (F-C-C-C-C,  $J$  = 4 Hz), 130.0 (2C), 127.8 (2C), 126.2, 114.3 (F-C-C,  $J$  = 22 Hz, 2 C), 83.9, 52.8, 39.5, 25.0 (2C), 24.8 (2C), 22.0 ppm [Note: the carbon attached to boron was not observed due to quadrupole broadening caused by the  $^{11}\text{B}$  nucleus].  $^{19}\text{F NMR}$  (376 MHz,  $\text{CDCl}_3$ )  $\delta$  -115.61 ppm. **ESI-HR** calcd for  $\text{C}_{23}\text{H}_{26}\text{BFO}_4\text{Na}^+$  ( $[\text{M}+\text{Na}]^+$ ) 418.18367, found 418.18307. **IR**  $\tilde{\nu}$  ( $\text{cm}^{-1}$ ) 1709, 1327, 1142. **M. P.** 138.5 – 138.7 °C. **Yield** = 95%.  $[\alpha]_D^{20}$  = 6.0 ( $c$  = 1.1, MeOH) for a 99% ee sample.

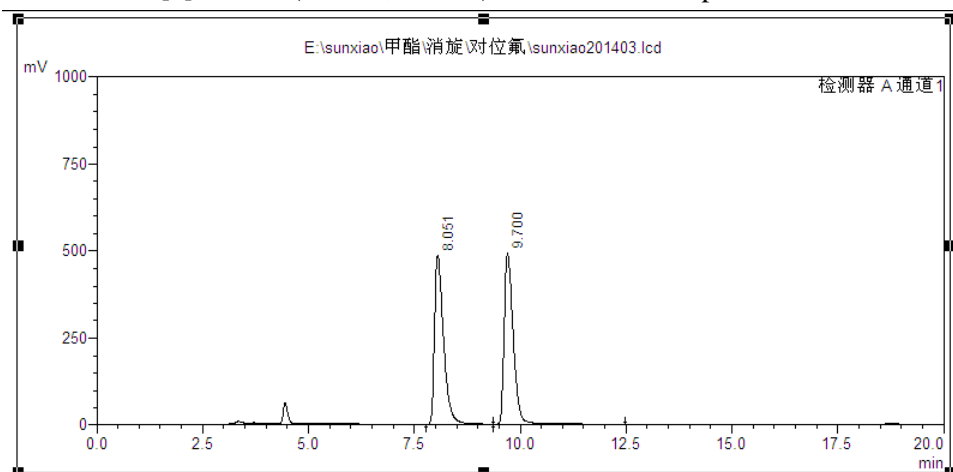

峰表

| 峰# | 保留时间  | 面积       | 高度     | 面积 %    | 高度 %    |
|----|-------|----------|--------|---------|---------|
| 1  | 8.051 | 7266748  | 484750 | 49.418  | 49.696  |
| 2  | 9.700 | 7437938  | 490679 | 50.582  | 50.304  |
| 总计 |       | 14704686 | 975429 | 100.000 | 100.000 |

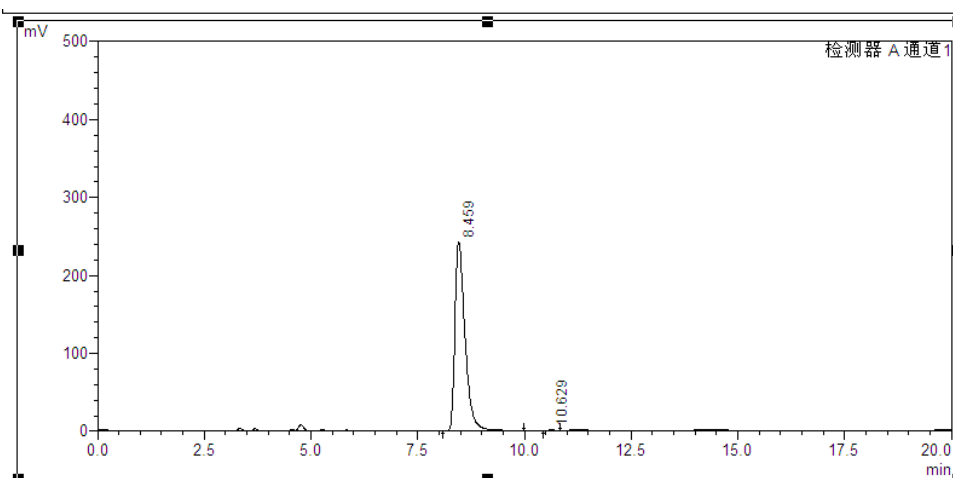

峰表

| 峰# | 保留时间   | 面积      | 高度     | 面积 %    | 高度 %    |
|----|--------|---------|--------|---------|---------|
| 1  | 8.459  | 3972374 | 241949 | 99.811  | 99.754  |
| 2  | 10.629 | 7503    | 598    | 0.189   | 0.246   |
| 总计 |        | 3979877 | 242546 | 100.000 | 100.000 |

**Methyl (1*S*,2*R*)-1-(4-chlorophenyl)-2-phenyl-2-(4,4,5,5-tetramethyl-1,3,2-dioxaborolan-2-yl)cyclopropane-1-carboxylate (3ea)**

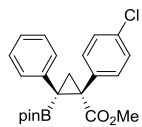

White solid, 99% ee (Daicel OJ-H 0.46\*25 cm, *n*-Hexane : *i*-PrOH 97 : 3, 1 mL/min, 35 °C, 4.2 Mpa,  $t_R$  (minor) = 4.367 min,  $t_R$  (major) = 6.396 min);  $^1\text{H NMR}$  (400 MHz,  $\text{CDCl}_3$ )  $\delta$  7.17 (d,  $J = 7.2$  Hz, 2H), 7.08 – 6.96 (m, 7H), 3.67 (s, 3H), 2.12 (d,  $J = 4.4$  Hz, 1H), 2.10 (d,  $J = 4.4$  Hz, 1H), 1.25 (s, 6H), 1.23 (s, 6H) ppm.  $^{13}\text{C NMR}$  (100 MHz,  $\text{CDCl}_3$ )  $\delta$  174.7, 137.1, 133.8, 132.9 (2C), 132.6, 129.9 (2C), 127.8 (2C), 127.7 (2C), 126.3, 83.9 (2C), 52.9, 39.6, 25.0 (2C), 24.8 (2C), 22.0 ppm [Note: the carbon attached to boron was not observed due to quadrupole broadening caused by the  $^{11}\text{B}$  nucleus]. **ESI-HR** calcd for  $\text{C}_{23}\text{H}_{26}\text{BClO}_4\text{Na}^+$  ( $[\text{M}+\text{Na}]^+$ ) 434.15412, found 434.15353. **IR**  $\tilde{\nu}$  ( $\text{cm}^{-1}$ ) 1715, 1310, 1145. **M. P.** 144.5 – 144.7 °C. **Yield** = 84%.  $[\alpha]_{\text{D}}^{20} = 16.7$  ( $c = 1.24$ , MeOH) for a 99% ee sample.

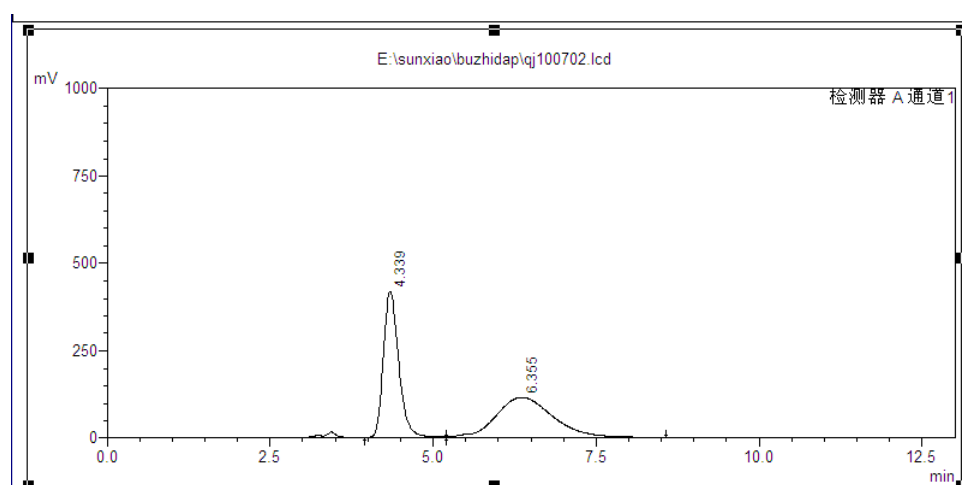

峰表

| 峰# | 保留时间  | 面积       | 高度     | 面积 %    | 高度 %    |
|----|-------|----------|--------|---------|---------|
| 1  | 4.339 | 6805063  | 418015 | 49.763  | 78.502  |
| 2  | 6.355 | 6869947  | 114477 | 50.237  | 21.498  |
| 总计 |       | 13675009 | 532492 | 100.000 | 100.000 |

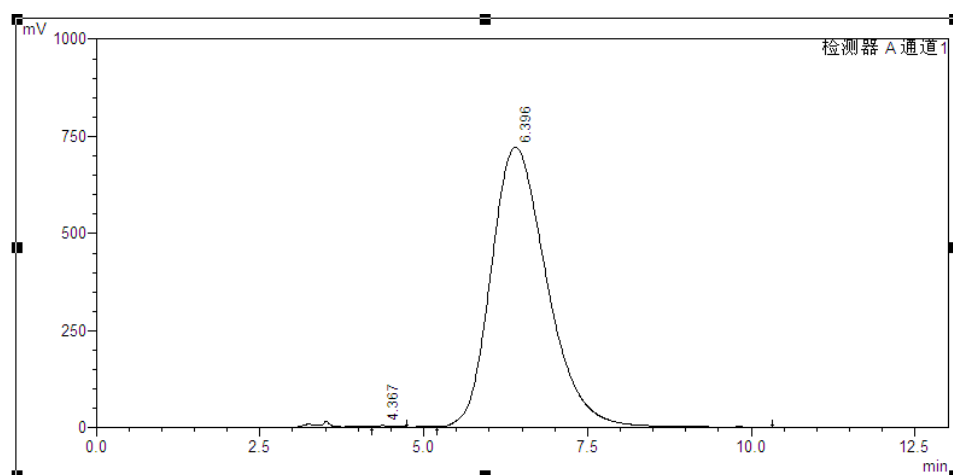

峰表

| 峰# | 保留时间  | 面积       | 高度     | 面积 %    | 高度 %    |
|----|-------|----------|--------|---------|---------|
| 1  | 4.367 | 124540   | 5573   | 0.289   | 0.767   |
| 2  | 6.396 | 42925760 | 721007 | 99.711  | 99.233  |
| 总计 |       | 43050300 | 726580 | 100.000 | 100.000 |

**Methyl (1*S*, 2*R*)-1-(4-bromophenyl)-2-phenyl-2-(4,4,5,5-tetramethyl-1,3,2-dioxaborolan-2-yl)cyclopropane-1-carboxylate (3fa)**

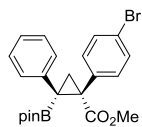

White solid, 94% ee (Daicel OD-H 0.46\*25 cm, *n*-Hexane : *i*-PrOH 99.7 : 0.3, 1 mL/min, 35 °C, 3.9 Mpa,  $t_R$  (minor) = 10.295 min,  $t_R$  (major) = 8.933 min);  $^1\text{H}$  NMR (400 MHz,  $\text{CDCl}_3$ )  $\delta$  7.19 – 7.16 (m, 4H), 7.07 – 6.97 (m, 5H), 3.67 (s, 3H), 2.12 (d,  $J$  = 4.8 Hz, 1H), 2.10 (d,  $J$  = 4.8 Hz, 1H), 1.25 (s, 6H), 1.23 (s, 6H) ppm.  $^{13}\text{C}$  NMR (100 MHz,  $\text{CDCl}_3$ )  $\delta$  174.6, 137.0, 134.4, 133.2 (2C), 130.6 (2C), 129.9 (2C), 127.9 (2C), 126.3, 120.9, 83.9 (2C), 52.9, 39.6, 25.0 (2C), 24.7 (2C), 21.9 ppm [Note: the carbon attached to boron was not observed due to quadrupole broadening caused by the  $^{11}\text{B}$  nucleus]. **ESI-HR** calcd for  $\text{C}_{23}\text{H}_{26}\text{BBrO}_4\text{Na}^+$  ( $[\text{M}+\text{Na}]^+$ ) 479.09997, found 479.09915. **IR**  $\tilde{\nu}$  ( $\text{cm}^{-1}$ ) 1715, 1309, 1145. **M. P.** 167.6 – 168.3 °C. **Yield** = 89%.  $[\alpha]_{\text{D}}^{20}$  = 17.8 ( $c$  = 0.37, MeOH) for a 94% ee sample.

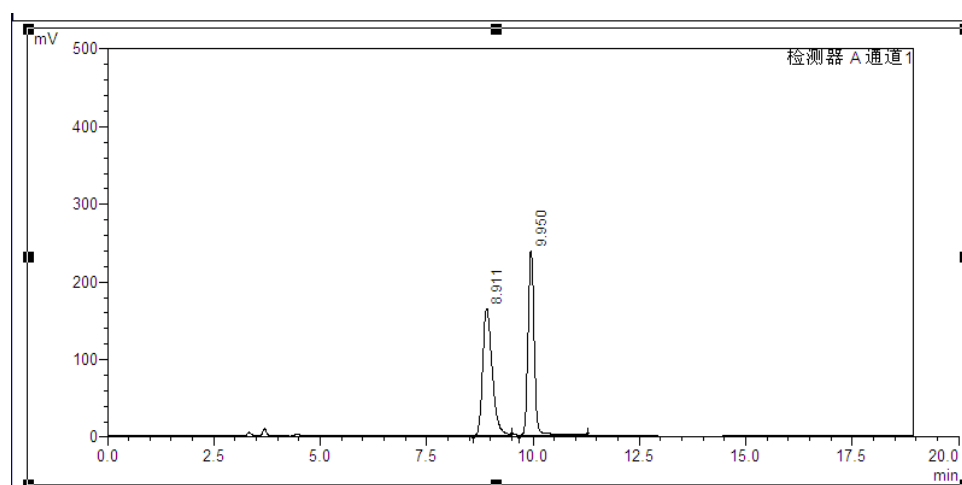

峰表

| 峰# | 保留时间  | 面积      | 高度     | 面积 %    | 高度 %    |
|----|-------|---------|--------|---------|---------|
| 1  | 8.911 | 2565450 | 163856 | 50.979  | 40.802  |
| 2  | 9.950 | 2466879 | 237731 | 49.021  | 59.198  |
| 总计 |       | 5032329 | 401587 | 100.000 | 100.000 |

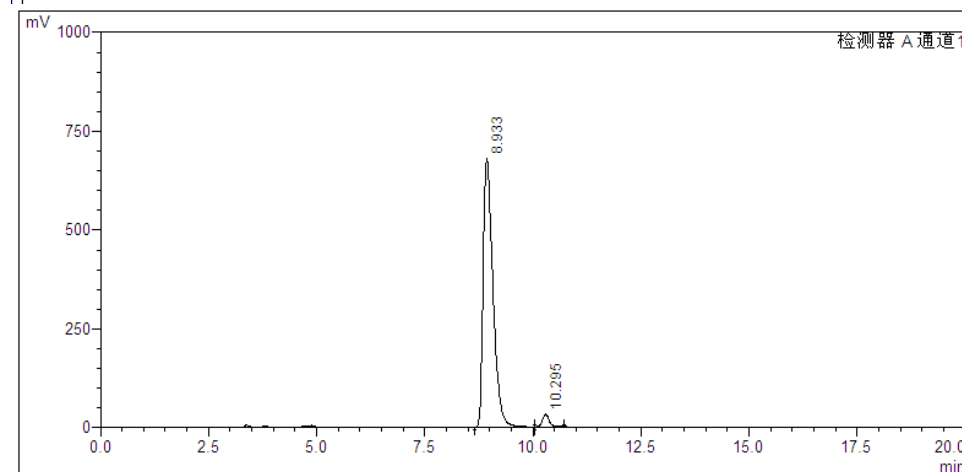

峰表

| 峰# | 保留时间   | 面积       | 高度     | 面积 %    | 高度 %    |
|----|--------|----------|--------|---------|---------|
| 1  | 8.933  | 10735678 | 678516 | 96.760  | 95.462  |
| 2  | 10.295 | 359534   | 32254  | 3.240   | 4.538   |
| 总计 |        | 11095212 | 710770 | 100.000 | 100.000 |

**Methyl (1*S*, 2*R*) -1-(2-chlorophenyl)-2-phenyl-2-(4,4,5,5-tetramethyl-1,3,2-dioxaborolan-2-yl)cyclopropane-1-carboxylate (3ga)**

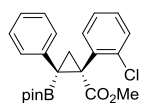

White solid, 99% ee (Daicel AD-H 0.46\*25 cm, *n*-Hexane : *i*-PrOH 98 : 2, 1 mL/min, 35 °C, 3.2 Mpa,  $t_R$  (minor) = 4.481 min,  $t_R$  (major) = 4.823 min);  $^1\text{H NMR}$  (400 MHz,  $\text{CDCl}_3$ )  $\delta$  7.19 (d,  $J = 7.2$  Hz, 2H), 7.15 – 7.13 (m, 1H), 7.05 (t,  $J = 7.2$  Hz, 2H), 7.01 – 6.93 (m, 4H), 3.68 (s, 3H), 2.14 (d,  $J = 4.4$  Hz, 1H), 2.10 (d,  $J = 4.4$  Hz, 1H), 1.26 (s, 6H), 1.23 (s, 6H) ppm.  $^{13}\text{C NMR}$  (100 MHz,  $\text{CDCl}_3$ )  $\delta$  174.5, 137.3, 136.9, 133.2, 131.8, 129.9 (2C), 129.7, 128.6, 127.8 (2C), 127.0, 126.3, 84.0 (2C), 52.9, 39.8, 25.0 (2C), 24.8 (2C), 21.9 ppm [Note: the carbon attached to boron was not observed due to quadrupole broadening caused by the  $^{11}\text{B}$  nucleus]. **ESI-HR** calcd for  $\text{C}_{23}\text{H}_{26}\text{BClO}_4\text{Na}^+$  ( $[\text{M}+\text{Na}]^+$ ) 435.15049, found 435.15012. **IR**  $\tilde{\nu}$  ( $\text{cm}^{-1}$ ) 1718, 1311, 1147. **M. P.** 128.1 – 129.3 °C. **Yield** = 85%.  $[\alpha]_D^{20} = 86.7$  ( $c = 0.98$ , MeOH) for a 99% ee sample.

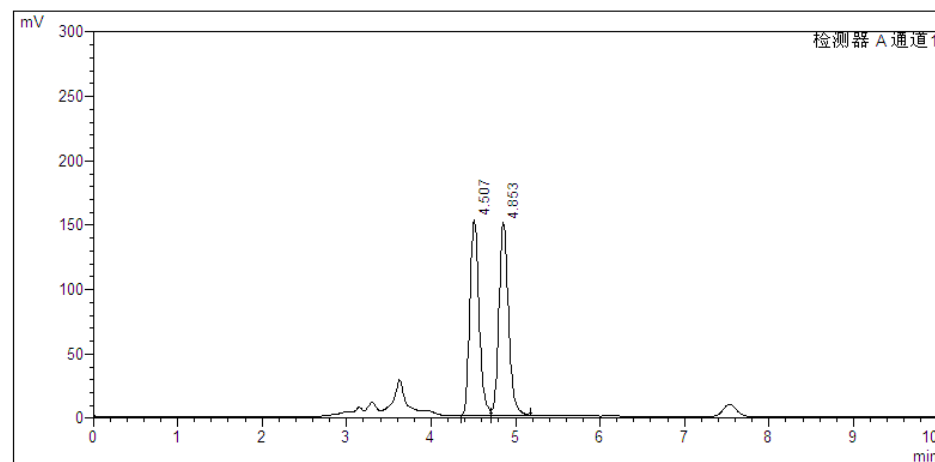

峰表

| 峰# | 保留时间  | 面积      | 高度     | 面积 %    | 高度 %    |
|----|-------|---------|--------|---------|---------|
| 1  | 4.507 | 1159699 | 152085 | 49.615  | 50.321  |
| 2  | 4.853 | 1177702 | 150144 | 50.385  | 49.679  |
| 总计 |       | 2337401 | 302229 | 100.000 | 100.000 |

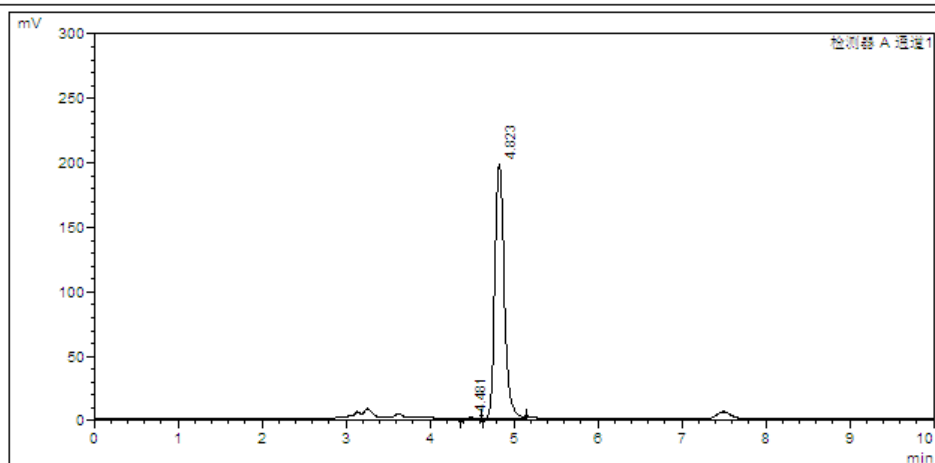

峰表

| 峰# | 保留时间  | 面积      | 高度     | 面积 %    | 高度 %    |
|----|-------|---------|--------|---------|---------|
| 1  | 4.481 | 3320    | 461    | 0.217   | 0.234   |
| 2  | 4.823 | 1524858 | 196840 | 99.783  | 99.766  |
| 总计 |       | 1528179 | 197301 | 100.000 | 100.000 |



**Methyl (1*S*, 2*R*)-1-(3-chlorophenyl)-2-phenyl-2-(4,4,5,5-tetramethyl-1,3,2-dioxaborolan-2-yl)cyclopropane-1-carboxylate (3ha)**

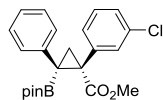

White solid, 96% ee (Daicel OD-H 0.46\*25 cm, *n*-Hexane : *i*-PrOH 99.8 : 0.2, 1 mL/min, 35 °C, 4.0 Mpa,  $t_R$  (minor) = 15.758 min,  $t_R$  (major) = 12.986 min);  $^1\text{H}$  NMR (400 MHz,  $\text{CDCl}_3$ )  $\delta$  7.34 – 7.32 (m, 2H), 7.17 (d,  $J$  = 8.0 Hz, 1H), 7.04 – 6.90 (m, 6H), 3.67 (s, 3H), 2.22 (d,  $J$  = 4.4 Hz, 1H), 2.04 (d,  $J$  = 4.4 Hz, 1H), 1.27 (s, 6H), 1.25 (s, 6H) ppm.  $^{13}\text{C}$  NMR (100 MHz,  $\text{CDCl}_3$ )  $\delta$  174.7, 137.2, 137.0, 134.0, 129.8 (2C), 129.4, 128.3 (2C), 127.5, 126.2, 125.9, 83.7 (2C), 53.0, 25.1 (2C), 24.8 (2C)ppm [Note: the carbon attached to boron was not observed due to quadrupole broadening caused by the  $^{11}\text{B}$  nucleus]. **ESI-HR** calcd for  $\text{C}_{23}\text{H}_{26}\text{BClO}_4\text{H}^+$  ( $[\text{M}+\text{H}]^+$ ) 413.16854, found 413.16669. **IR**  $\tilde{\nu}$  ( $\text{cm}^{-1}$ ) 1715, 1309, 1146. **M. P.** 140.1 – 140.7 °C. **Yield** = 88%.  $[\alpha]_{\text{D}}^{20}$  = 16.0 ( $c$  = 1, MeOH) for a 96% ee sample.

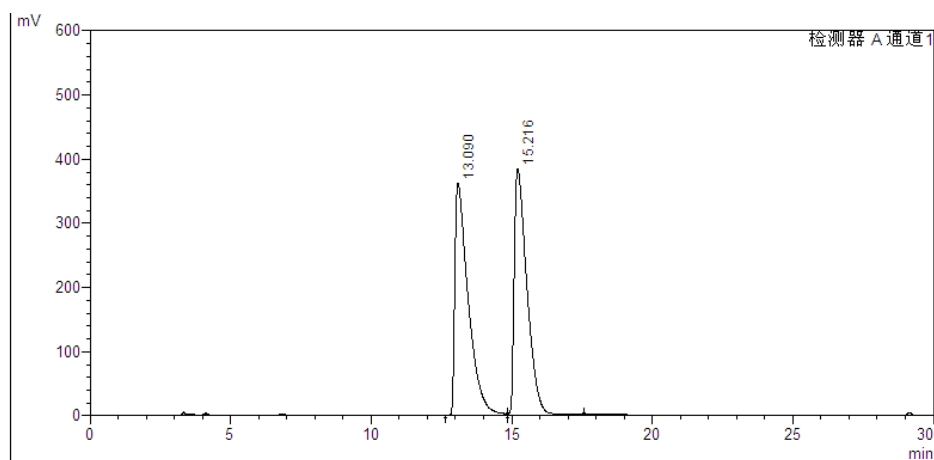

峰表

| 峰# | 保留时间   | 面积       | 高度     | 面积 %    | 高度 %    |
|----|--------|----------|--------|---------|---------|
| 1  | 13.090 | 11912143 | 361732 | 49.725  | 48.502  |
| 2  | 15.216 | 12043753 | 384076 | 50.275  | 51.498  |
| 总计 |        | 23955896 | 745807 | 100.000 | 100.000 |

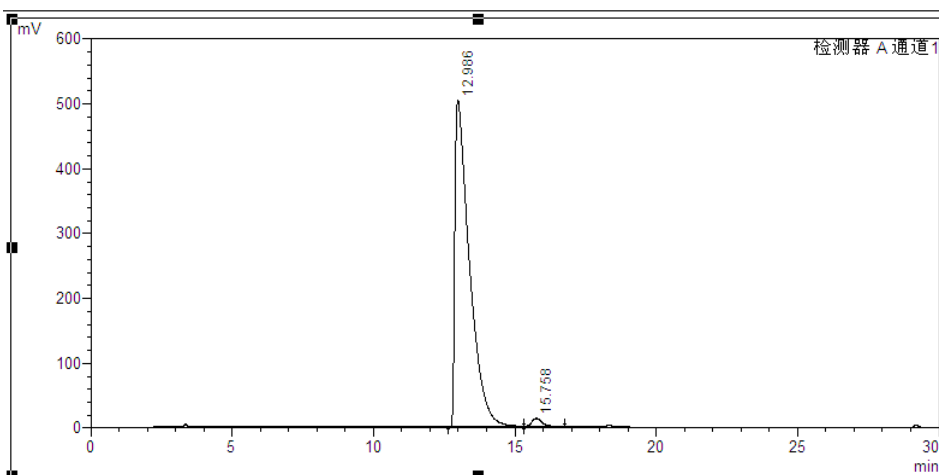

峰表

| 峰# | 保留时间   | 面积       | 高度     | 面积 %    | 高度 %    |
|----|--------|----------|--------|---------|---------|
| 1  | 12.986 | 18096346 | 504711 | 97.969  | 97.476  |
| 2  | 15.758 | 375207   | 13070  | 2.031   | 2.524   |
| 总计 |        | 18471553 | 517781 | 100.000 | 100.000 |

**Methyl (1*S*,2*R*)-1-(3-bromophenyl)-2-phenyl-2-(4,4,5,5-tetramethyl-1,3,2-dioxaborolan-2-yl)cyclopropane-1-carboxylate (3ia)**

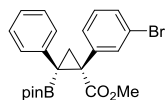

White solid, 96% ee (Daicel OD-H 0.46\*25 cm, *n*-Hexane : *i*-PrOH 99.7 : 0.3, 1 mL/min, 35 °C, 3.9 Mpa,  $t_R$  (minor) = 9.252 min,  $t_R$  (major) = 8.265 min);  $^1\text{H}$  NMR (400 MHz,  $\text{CDCl}_3$ )  $\delta$  7.30 (t,  $J$  = 1.6 Hz, 1H), 7.20 – 7.17 (m, 2H), 7.14 – 7.12 (m, 1H), 7.08 – 7.03 (m, 3H), 7.00 – 6.96 (m, 1H), 6.90 (t,  $J$  = 8.0 Hz, 1H), 3.68 (s, 3H), 2.14 (d,  $J$  = 4.8 Hz, 1H), 2.10 (d,  $J$  = 4.8 Hz, 1H), 1.25 (s, 6H), 1.23 (s, 6H) ppm.  $^{13}\text{C}$  NMR (100 MHz,  $\text{CDCl}_3$ )  $\delta$  174.5, 137.6, 136.9, 134.7, 130.2, 129.9 (3C), 128.9, 127.8 (2C), 126.3, 121.4, 84.0 (2C), 53.0, 39.7, 25.0 (2C), 24.8 (2C), 21.9 ppm [Note: the carbon attached to boron was not observed due to quadrupole broadening caused by the  $^{11}\text{B}$  nucleus].  $^{11}\text{B}$  NMR (128 MHz,  $\text{CDCl}_3$ )  $\delta$  30.36. ESI-HR calcd for  $\text{C}_{23}\text{H}_{25}\text{BCl}_2\text{O}_4\text{Na}^+$  ( $[\text{M}+\text{Na}]^+$ ) 469.11152, found 469.11148. IR  $\tilde{\nu}$  ( $\text{cm}^{-1}$ ) 1718, 1309, 1145. **M. P.** 133.5 – 133.9 °C. **Yield**= 96%.  $[\alpha]_D^{20}$  = 9.2 ( $c$  = 1, MeOH) for a 96% ee sample.

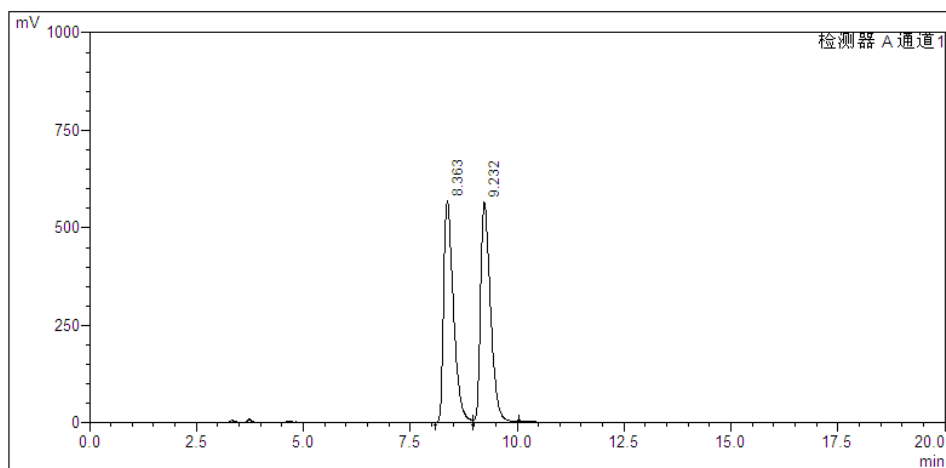

峰表

| 峰# | 保留时间  | 面积       | 高度      | 面积 %    | 高度 %    |
|----|-------|----------|---------|---------|---------|
| 1  | 8.363 | 9059523  | 567920  | 49.673  | 50.196  |
| 2  | 9.232 | 9178654  | 563488  | 50.327  | 49.804  |
| 总计 |       | 18238177 | 1131408 | 100.000 | 100.000 |

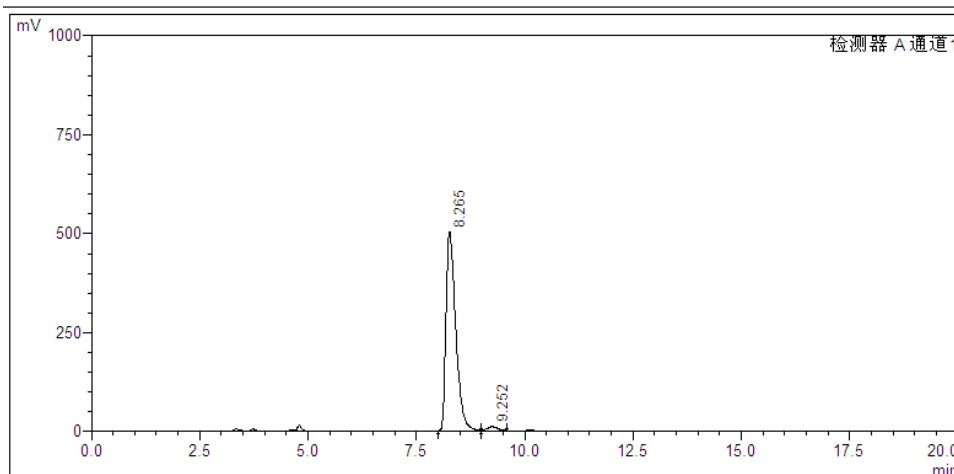

峰表

| 峰# | 保留时间  | 面积      | 高度     | 面积 %    | 高度 %    |
|----|-------|---------|--------|---------|---------|
| 1  | 8.265 | 7896582 | 503406 | 97.738  | 97.967  |
| 2  | 9.252 | 182738  | 10445  | 2.262   | 2.033   |
| 总计 |       | 8079319 | 513851 | 100.000 | 100.000 |

**Methyl(1*S*,2*R*)-1-(3,4-dichlorophenyl)-2-phenyl-2-(4,4,5,5-tetramethyl-1,3,2-dioxaborolan-2-yl) cyclopropane-1-carboxylate (3ja)**

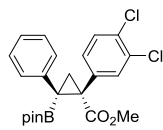

White solid, 98% ee (Daicel AD-H 0.46\*25 cm, *n*-Hexane : *i*-PrOH 98 : 2, 1 mL/min, 35 °C, 3.2 Mpa,  $t_R$  (minor) = 5.158 min,  $t_R$  (major) = 4.891 min);  $^1\text{H}$  NMR (400 MHz,  $\text{CDCl}_3$ )  $\delta$  7.23 (d,  $J$  = 2 Hz, 1H), 7.20 – 7.17 (m, 2H), 7.11 – 7.06 (m, 3H), 7.02 – 6.95 (m, 2H), 3.68(s, 3H), 2.12 (d,  $J$  = 4.4 Hz, 1H), 2.10 (d,  $J$  = 4.4 Hz, 1H), 1.25 (s, 6H), 1.23 (s, 6H) ppm.  $^{13}\text{C}$  NMR (100 MHz,  $\text{CDCl}_3$ )  $\delta$  174.1, 136.7, 135.7, 133.5, 131.4, 131.0, 130.9, 129.8 (2C), 129.3, 128.0, 126.6 (2C), 84.0 (2C), 53.0, 39.2, 25.0 (2C), 24.7 (2C), 22.0 ppm [Note: the carbon attached to boron was not observed due to quadrupole broadening caused by the  $^{11}\text{B}$  nucleus]. **ESI-HR** calcd for  $\text{C}_{23}\text{H}_{26}\text{BBrO}_4\text{Na}^+$  ( $[\text{M}+\text{Na}]^+$ ) 479.09997, found 479.09854. **IR**  $\tilde{\nu}$  ( $\text{cm}^{-1}$ ) 1714, 1311, 1146. **M. P.** 124.3 – 124.5 °C. **Yield**= 85%.  $[\alpha]_D^{20}$  = 19.0 ( $c$  = 1, MeOH) for a 98% ee sample.

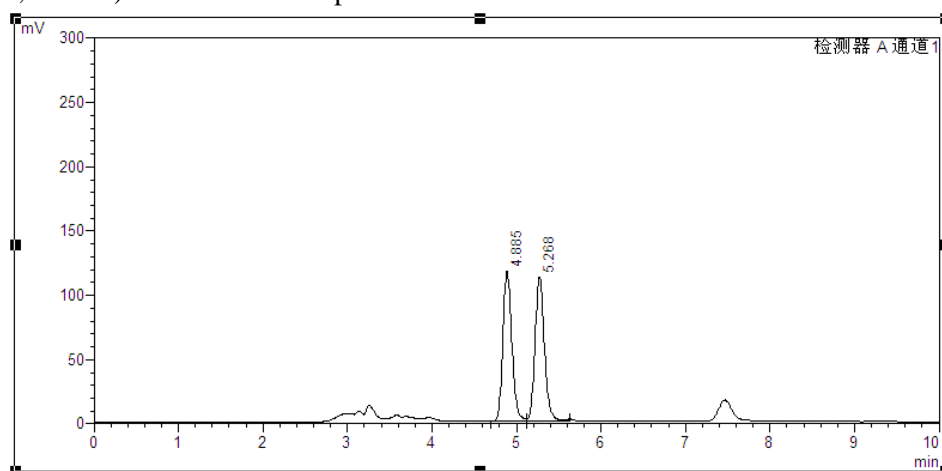

峰表

| 峰# | 保留时间  | 面积      | 高度     | 面积 %    | 高度 %    |
|----|-------|---------|--------|---------|---------|
| 1  | 4.885 | 862548  | 116812 | 49.665  | 51.002  |
| 2  | 5.268 | 874169  | 112220 | 50.335  | 48.998  |
| 总计 |       | 1736717 | 229032 | 100.000 | 100.000 |

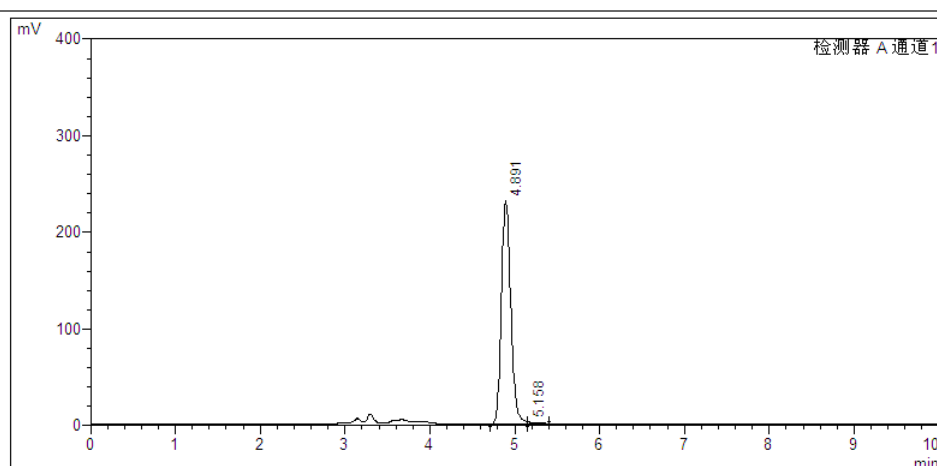

峰表

| 峰# | 保留时间  | 面积      | 高度     | 面积 %    | 高度 %    |
|----|-------|---------|--------|---------|---------|
| 1  | 4.891 | 1769421 | 231309 | 98.976  | 99.092  |
| 2  | 5.158 | 18311   | 2121   | 1.024   | 0.908   |
| 总计 |       | 1787733 | 233429 | 100.000 | 100.000 |

**Methyl (1*S*,2*R*)-2-phenyl-2-(4,4,5,5-tetramethyl-1,3,2-dioxaborolan-2-yl)-1-(*p*-tolyl) cyclopropane-1-carboxylate (3ka)**

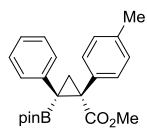

White solid, 98% ee (Daicel AD-H 0.46\*25 cm, *n*-Hexane : *i*-PrOH 98 : 2, 1 mL/min, 35 °C, 3.2 Mpa,  $t_R$  (minor) = 6.273 min,  $t_R$  (major) = 5.246 min);  $^1\text{H}$  NMR (400 MHz,  $\text{CDCl}_3$ )  $\delta$  7.20 – 7.18 (m, 2H), 7.06 – 7.01 (m, 4H), 6.97 – 6.93 (m, 1H), 6.85 (d,  $J$  = 8.0 Hz, 2H), 3.67 (s, 3H), 2.16 (s, 3H), 2.13 (d,  $J$  = 4.4 Hz, 1H), 2.07 (d,  $J$  = 4.4 Hz, 1H), 1.24 (s, 6H), 1.23 (s, 6H) ppm.  $^{13}\text{C}$  NMR (100 MHz,  $\text{CDCl}_3$ )  $\delta$  175.5, 137.6, 136.3, 132.0, 131.3 (2C), 130.1 (2C), 128.2 (2C), 127.6 (2C), 126.0, 83.7 (2C), 52.9, 40.0, 25.0 (2C), 24.8 (2C), 22.1, 21.2 ppm [Note: the carbon attached to boron was not observed due to quadrupole broadening caused by the  $^{11}\text{B}$  nucleus]. **ESI-HR** calcd for  $\text{C}_{24}\text{H}_{29}\text{BO}_4\text{Na}^+$  ( $[\text{M}+\text{Na}]^+$ ) 415.20511, found 415.20514. **IR**  $\tilde{\nu}$  ( $\text{cm}^{-1}$ ) 1712, 1305, 1146. **M. P.** 127.3 – 128.1 °C. **Yield** = 96%.  $[\alpha]_D^{20}$  = 16.8 ( $c$  = 1.2, MeOH) for a 98% ee sample.

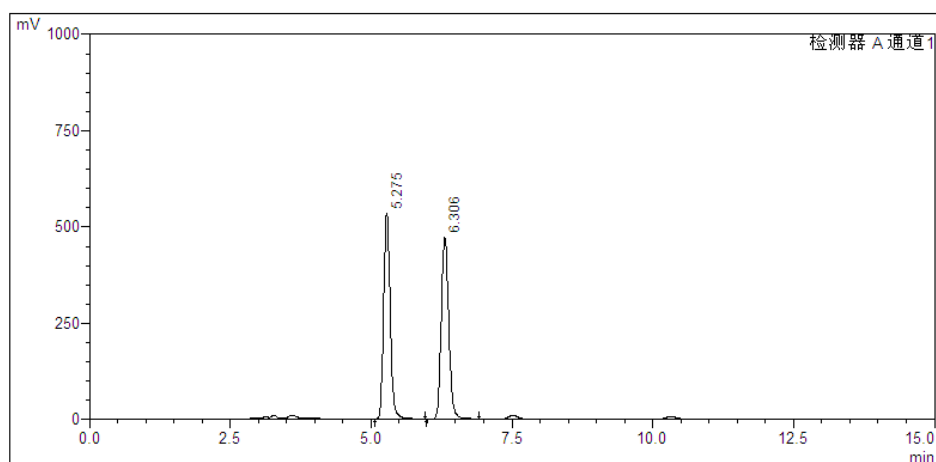

峰表

| 峰# | 保留时间  | 面积      | 高度      | 面积 %    | 高度 %    |
|----|-------|---------|---------|---------|---------|
| 1  | 5.275 | 4303084 | 533344  | 49.968  | 53.032  |
| 2  | 6.306 | 4308583 | 472355  | 50.032  | 46.968  |
| 总计 |       | 8611667 | 1005699 | 100.000 | 100.000 |

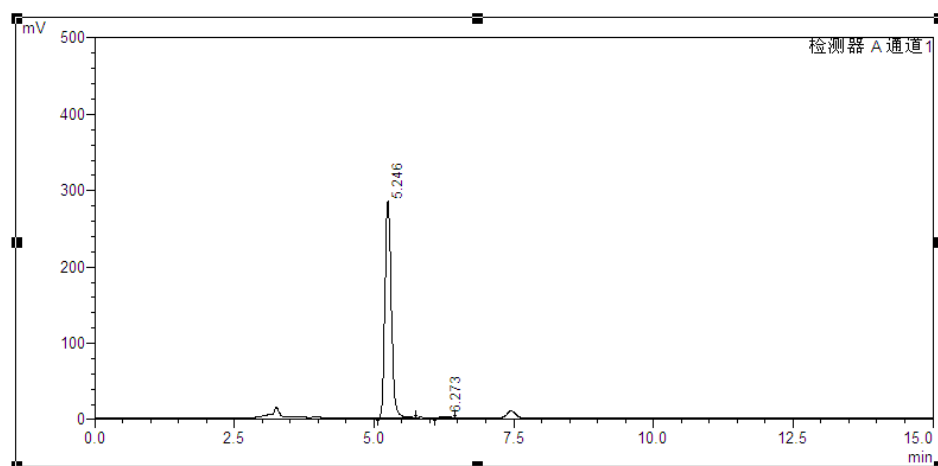

峰表

| 峰# | 保留时间  | 面积      | 高度     | 面积 %    | 高度 %    |
|----|-------|---------|--------|---------|---------|
| 1  | 5.246 | 2242780 | 284918 | 99.011  | 99.355  |
| 2  | 6.273 | 22399   | 1851   | 0.989   | 0.645   |
| 总计 |       | 2265179 | 286769 | 100.000 | 100.000 |

**Methyl(1*S*,2*R*)-1-(4-methoxyphenyl)-2-phenyl-2-(4,4,5,5-tetramethyl-1,3,2-dioxaborolan-2-yl)cyclopropane-1-carboxylate (3la)**

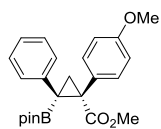

White solid, 99% ee (Daicel OJ-H 0.46\*25 cm, *n*-Hexane : *i*-PrOH 97 : 3, 1 mL/min, 35 °C, 4.2 Mpa,  $t_R$  (minor) = 5.857 min,  $t_R$  (major) = 14.277 min);  $^1\text{H}$  NMR (400 MHz,  $\text{CDCl}_3$ )  $\delta$  7.18 (d,  $J = 7.2$  Hz, 2H), 7.05 – 7.00 (m, 4H), 6.94 – 6.92 (t,  $J = 7.2$  Hz, 1H), 6.55 (d,  $J = 8.8$  Hz, 2H), 3.63 (s, 3H), 3.58 (s, 3H), 2.10 (d,  $J = 4.0$  Hz, 1H), 2.07 (d,  $J = 4.0$  Hz, 1H), 1.24 (s, 6H), 1.22 (s, 6H) ppm.  $^{13}\text{C}$  NMR (100 MHz,  $\text{CDCl}_3$ )  $\delta$  175.3, 158.1, 137.5, 132.4 (2C), 129.9 (2C), 127.5 (2C), 127.1, 125.9, 112.7 (2C), 83.6 (2C), 54.9, 52.66, 39.5, 24.9 (2C), 24.7 (2C), 22.0 ppm [Note: the carbon attached to boron was not observed due to quadrupole broadening caused by the  $^{11}\text{B}$  nucleus]. **ESI-HR** calcd for  $\text{C}_{24}\text{H}_{29}\text{BO}_5\text{Na}^+$  ( $[\text{M}+\text{Na}]^+$ ) 431.20003, found 431.20090. **IR**  $\tilde{\nu}$  ( $\text{cm}^{-1}$ ) 1712, 1307, 1146. **M. P.** 136.7-136.8 °C. **Yield** = 99%.  $[\alpha]_D^{20} = 6.3$  ( $c = 0.67$ , MeOH) for a 99% ee sample.

<色谱图>

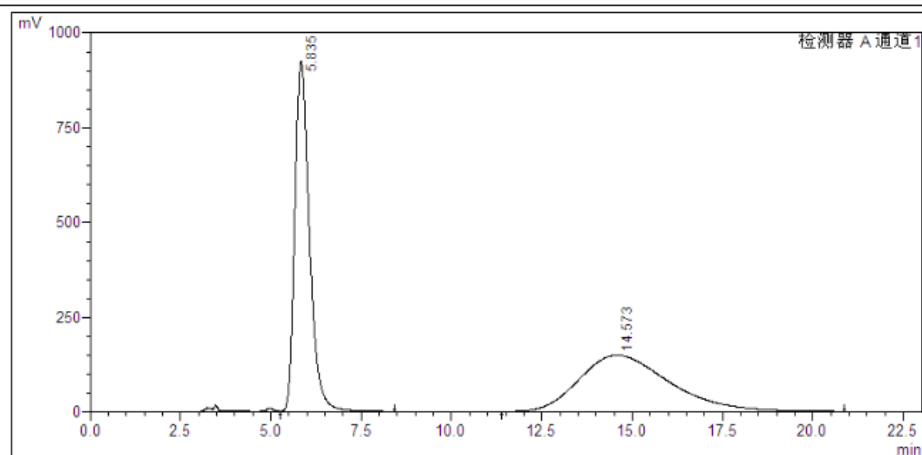

检测器 A Ch1 230nm

峰表

| 峰# | 保留时间   | 面积       | 高度      | 面积 %    | 高度 %    |
|----|--------|----------|---------|---------|---------|
| 1  | 5.835  | 26032071 | 923270  | 50.229  | 86.177  |
| 2  | 14.573 | 25794873 | 148100  | 49.771  | 13.823  |
| 总计 |        | 51826944 | 1071370 | 100.000 | 100.000 |

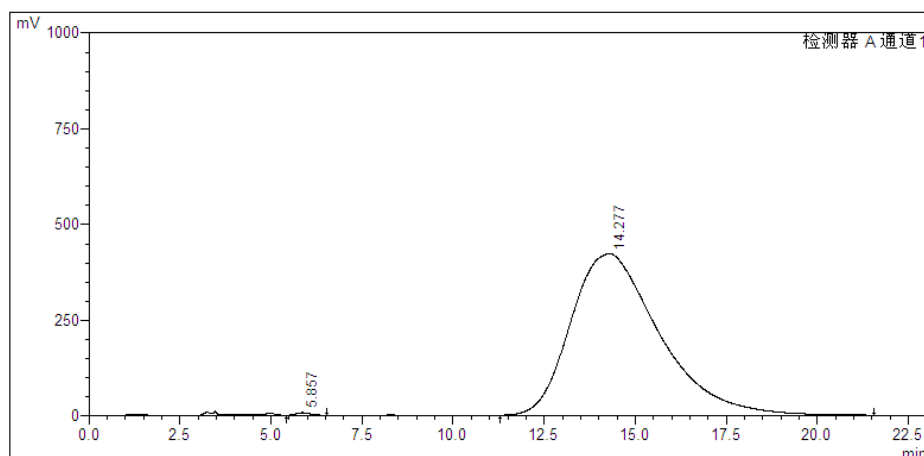

检测器 A Ch1 230nm

峰表

| 峰# | 保留时间   | 面积       | 高度     | 面积 %    | 高度 %    |
|----|--------|----------|--------|---------|---------|
| 1  | 5.857  | 250297   | 7771   | 0.347   | 1.802   |
| 2  | 14.277 | 71877655 | 423479 | 99.653  | 98.198  |
| 总计 |        | 72127952 | 431251 | 100.000 | 100.000 |

**Methyl(1*S*,2*R*)-1-(4-(*tert*-butyl)phenyl)-2-phenyl-2-(4,4,5,5-tetramethyl-1,3,2-dioxaborolan-2-yl) cyclopropane-1-carboxylate (3ma)**

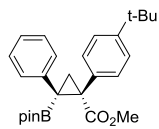

White solid, 97% ee (Daicel AD-H 0.46\*25 cm, *n*-Hexane : *i*-PrOH 98 : 2, 1 mL/min, 35 °C, 3.4 Mpa,  $t_R$  (minor) = 4.685 min,  $t_R$  (major) = 4.087 min);  $^1\text{H NMR}$  (400 MHz,  $\text{CDCl}_3$ )  $\delta$  7.16 – 7.14 (m, 2H), 7.04 – 6.96 (m, 6H), 6.93 – 6.90 (m, 1H), 3.68 (s, 3H), 2.14 (d,  $J = 4.4$  Hz, 1H), 2.07 (d,  $J = 4.4$  Hz, 1H), 1.31 (s, 6H), 1.30 (s, 6H), 1.23(s, 9H) ppm.  $^{13}\text{C NMR}$  (100 MHz,  $\text{CDCl}_3$ )  $\delta$  175.4, 149.4, 137.6, 131.8, 130.9 (2C), 130.1 (2C), 127.5 (2C), 125.8, 124.3 (2C), 83.8 (2C), 52.8, 39.9, 34.4, 31.3 (3C), 25.0 (2C), 24.8 (2C), 22.0 ppm [Note: the carbon attached to boron was not observed due to quadrupole broadening caused by the  $^{11}\text{B}$  nucleus]. **ESI-HR** calcd for  $\text{C}_{27}\text{H}_{35}\text{BO}_4\text{Na}^+$  ( $[\text{M}+\text{Na}]^+$ ) 457.25206, found 457.25232. **IR**  $\tilde{\nu}$  ( $\text{cm}^{-1}$ ) 1710, 1324, 1144. **M. P.** 159.6 – 160.3 °C. **Yield** = 87%.  $[\alpha]_D^{20} = 13.9$  ( $c = 1$ , MeOH) for a 97% ee sample.

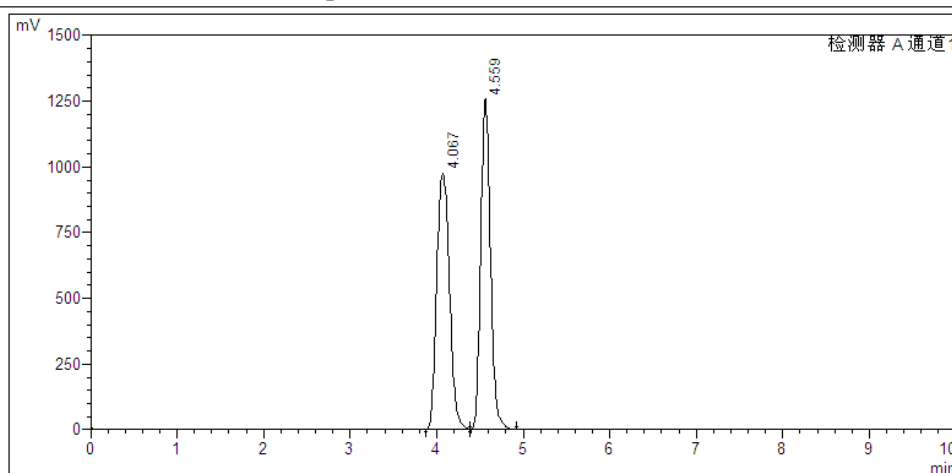

峰表

| 峰# | 保留时间  | 面积       | 高度      | 面积 %    | 高度 %    |
|----|-------|----------|---------|---------|---------|
| 1  | 4.067 | 10190979 | 979912  | 50.403  | 43.694  |
| 2  | 4.559 | 10028087 | 1262776 | 49.597  | 56.306  |
| 总计 |       | 20219066 | 2242688 | 100.000 | 100.000 |

检测器 A Ch1 230nm

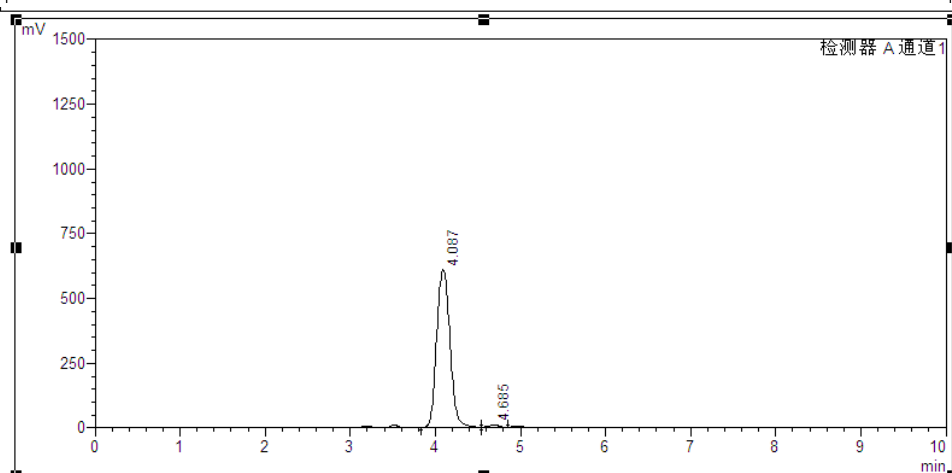

峰表

| 峰# | 保留时间  | 面积      | 高度     | 面积 %    | 高度 %    |
|----|-------|---------|--------|---------|---------|
| 1  | 4.087 | 6656096 | 610187 | 98.516  | 98.330  |
| 2  | 4.685 | 100265  | 10364  | 1.484   | 1.670   |
| 总计 |       | 6756361 | 620551 | 100.000 | 100.000 |

检测器 A Ch1 230nm

**Methyl (1*S*, 2*R*)-1-(3-methoxyphenyl)-2-phenyl-2-(4,4,5,5-tetramethyl-1,3,2-dioxaborolan-2-yl) cyclopropane-1-carboxylate (3na)**

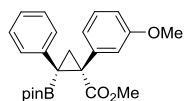

White solid, 96% ee (Daicel AD-H 0.46\*25 cm, *n*-Hexane : *i*-PrOH 99 : 1, 1 mL/ min, 35 °C, 3.3 Mpa,  $t_R$  (minor) = 8.892 min,  $t_R$  (major) = 9.662 min);  $^1\text{H}$  NMR (400 MHz,  $\text{CDCl}_3$ )  $\delta$  7.22 – 7.19 (m, 2H), 7.05 – 7.02 (m, 2H), 6.98 – 6.94 (m, 2H), 6.76 – 6.73 (m, 1H), 6.64 (t,  $J$  = 2.4 Hz, 1H), 6.58 – 6.55 (m, 1H), 3.68 (s, 3H), 3.64 (s, 3H), 2.14 (d,  $J$  = 4.4 Hz, 1H), 2.07 (d,  $J$  = 4.4 Hz, 1H), 1.26 (s, 6H), 1.24 (s, 6H) ppm.  $^{13}\text{C}$  NMR (100 MHz,  $\text{CDCl}_3$ )  $\delta$  175.1, 158.7, 137.4, 136.7, 130.0 (2C), 128.3, 127.6 (2C), 126.1, 124.1, 117.2, 112.8, 83.9 (2C), 55.3, 52.9, 40.4, 25.0 (2C), 24.8 (2C), 22.1 ppm [Note: the carbon attached to boron was not observed due to quadrupole broadening caused by the  $^{11}\text{B}$  nucleus]. **ESI-HR** calcd for  $\text{C}_{24}\text{H}_{29}\text{BO}_5\text{Na}^+$  ( $[\text{M}+\text{Na}]^+$ ) 431.20003, found 431.20041. **IR**  $\tilde{\nu}$  ( $\text{cm}^{-1}$ ) 1712, 1309, 1146. **M. P.** 126.0 – 126.4 °C. **Yield** = 97%.  $[\alpha]_D^{20}$  = 32.1 ( $c$  = 1.1, MeOH) for a 96% ee sample.

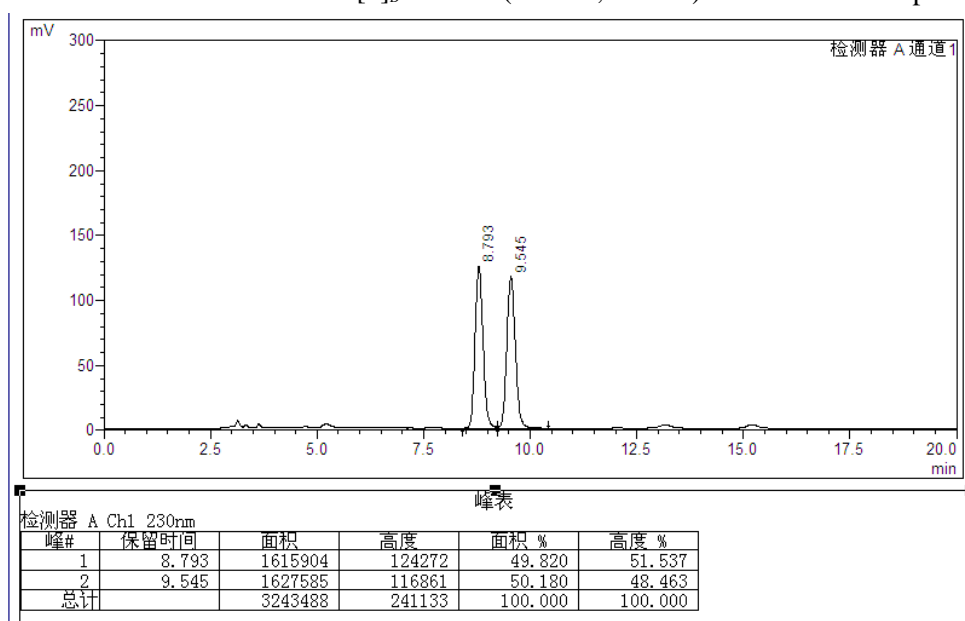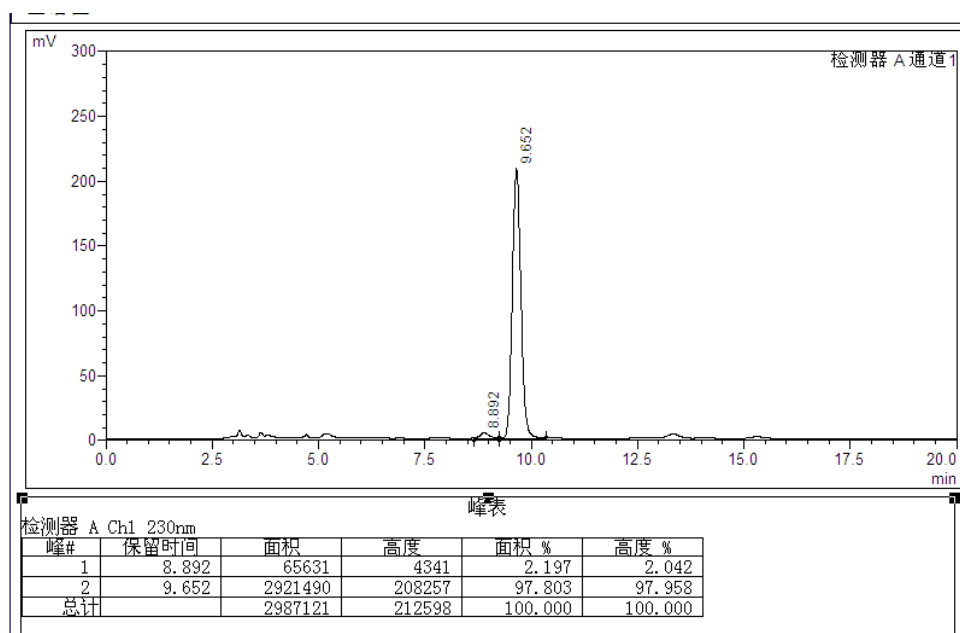

**Methyl (1*S*,2*R*)-1-(naphthalen-2-yl)-2-phenyl-2-(4,4,5,5-tetramethyl-1,3,2-dioxaborolan-2-yl)cyclopropane -1-carboxylate (30a)**

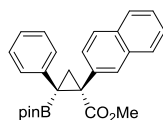

White solid, 96% ee (Daicel OD-H 0.46\*25 cm, *n*-Hexane : *i*-PrOH 99.8 : 0.2, 1 mL/ min, 35 °C, 3.9 Mpa,  $t_R$  (minor) = 17.417 min,  $t_R$  (major) = 15.096 min);  $^1\text{H NMR}$  (400 MHz,  $\text{CDCl}_3$ )  $\delta$  7.66 – 7.63 (m, 2H), 7.55 (d,  $J$  = 1.2 Hz, 1H), 7.51 (d,  $J$  = 8.4 Hz, 1H), 7.37 – 7.31 (m, 3H), 7.26 – 7.23 (m, 2H), 6.98 – 6.94 (m, 2H), 6.88 – 6.84 (m, 1H), 3.66 (s, 3H), 2.30 (d,  $J$  = 4.4 Hz, 1H), 2.18 (d,  $J$  = 4.4 Hz, 1H), 1.27 (s, 6H), 1.25 (s, 6H) ppm.  $^{13}\text{C NMR}$  (100 MHz,  $\text{CDCl}_3$ )  $\delta$  175.3, 137.2, 133.0, 132.9, 132.4, 130.2 (2C), 130.1, 129.8, 127.9, 127.7 (2C), 127.5, 126.7, 126.1, 125.7, 125.6, 83.9 (2C), 52.9, 40.4, 25.0 (2C), 24.8 (2C), 22.2 ppm [Note: the carbon attached to boron was not observed due to quadrupole broadening caused by the  $^{11}\text{B}$  nucleus]. **ESI-HR** calcd for  $\text{C}_{27}\text{H}_{29}\text{BO}_4\text{Na}^+$  ( $[\text{M}+\text{Na}]^+$ ) 451.20511, found 451.20541. **IR**  $\tilde{\nu}$  ( $\text{cm}^{-1}$ ) 1711, 1373, 1146. **M. P.** 135.0 – 146.9 °C. **Yield** = 83%.  $[\alpha]_D^{20}$  = -33.3 ( $c$  = 0.67, MeOH) for a 96% ee sample.

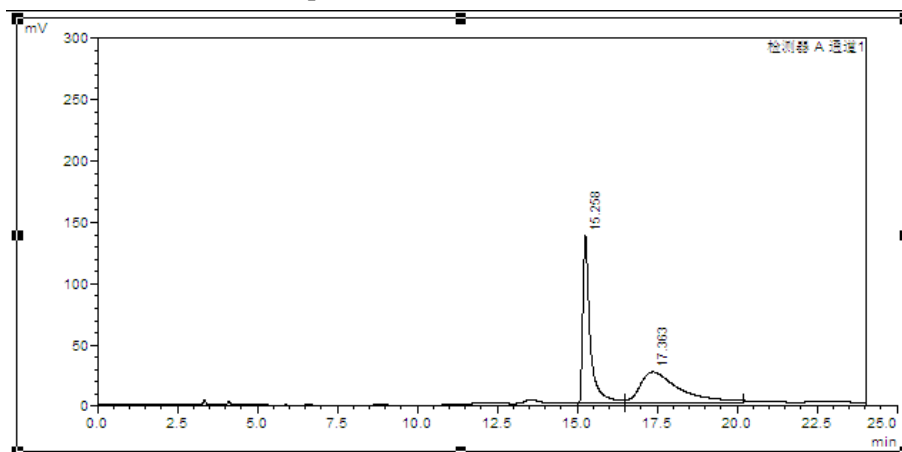

峰表

| 峰# | 保留时间   | 面积      | 高度     | 面积 %    | 高度 %    |
|----|--------|---------|--------|---------|---------|
| 1  | 15.258 | 2210774 | 137070 | 49.384  | 84.275  |
| 2  | 17.303 | 2265902 | 25575  | 50.616  | 15.725  |
| 总计 |        | 4476676 | 162645 | 100.000 | 100.000 |

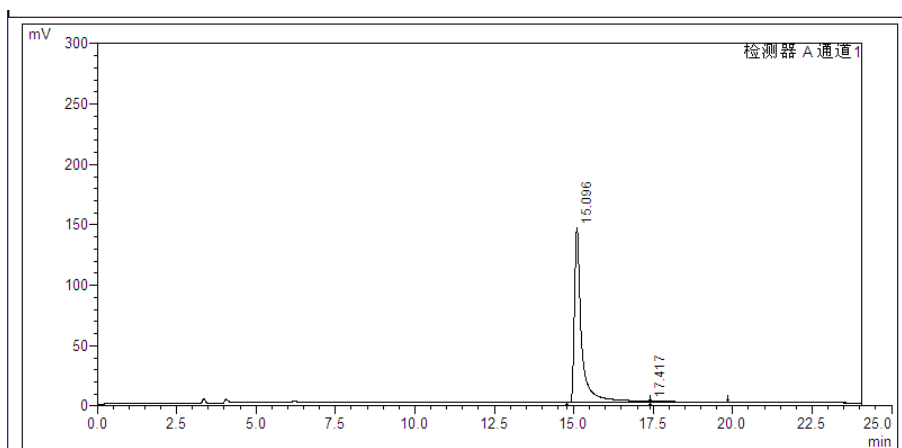

峰表

| 峰# | 保留时间   | 面积      | 高度     | 面积 %    | 高度 %    |
|----|--------|---------|--------|---------|---------|
| 1  | 15.096 | 2280910 | 144627 | 97.802  | 99.472  |
| 2  | 17.417 | 51272   | 767    | 2.198   | 0.528   |
| 总计 |        | 2332182 | 145394 | 100.000 | 100.000 |



**Methyl (1*S*, 2*R*)-2-(4-fluorophenyl)-1-phenyl-2-(4,4,5,5-tetramethyl-1,3,2-dioxaborolan-2-yl)cyclopropane-1-carboxylate (3ab)**

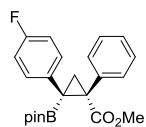

White solid, 98% ee (Daicel AD- H 0.46\*25 cm, *n*- Hexane : *i*- PrOH 98: 2, 1 mL/min, 35 °C, 3.2 Mpa,  $t_R$  (minor) = 5.846 min,  $t_R$  (major) = 5.311 min);  $^1\text{H NMR}$  (400 MHz,  $\text{CDCl}_3$ )  $\delta$  7.17 – 7.01 (m, 7H), 6.73 – 6.67 (m, 2H ), 3.68 (s, 3H), 2.12 (d,  $J$  = 4.4 Hz, 1H), 2.08 (d,  $J$  = 4.4 Hz, 1H), 1.24 (s, 6H), 1.23 (s, 6H) ppm.  $^{13}\text{C NMR}$  (100 MHz,  $\text{CDCl}_3$ )  $\delta$  175.1, 162.3 (F-C,  $J$  = 244 Hz), 134.9, 133.3(F-C-C-C,  $J$  = 3 Hz), 131.5(F-C-C-C,  $J$  = 8 Hz, 2C), 131.4 (2C), 127.6 (2C), 127.0, 114.5(F-C-C,  $J$  = 21 Hz, 2C), 83.9 (2C), 52.9, 40.3, 25.0 (2C), 24.8 (2C), 22.1 ppm [Note: the carbon attached to boron was not observed due to quadrupole broadening caused by the  $^{11}\text{B}$  nucleus].  $^{19}\text{F NMR}$  (376 MHz,  $\text{CDCl}_3$ )  $\delta$  -117.02 ppm.  $^{11}\text{B NMR}$  (128 MHz,  $\text{CDCl}_3$ )  $\delta$  30.08. **ESI-HR** calcd for  $\text{C}_{23}\text{H}_{26}\text{BFO}_4\text{Na}^+$  ( $[\text{M}+\text{Na}]^+$ ) 419.18004, found 419.18079. **IR**  $\tilde{\nu}$  ( $\text{cm}^{-1}$ ) 1712, 1321, 1145. **M. P.** 150.0 – 151.2 °C. **Yield** = 91%.  $[\alpha]_D^{20}$  = 10.3 ( $c$  = 1, MeOH) for a 98% ee sample.

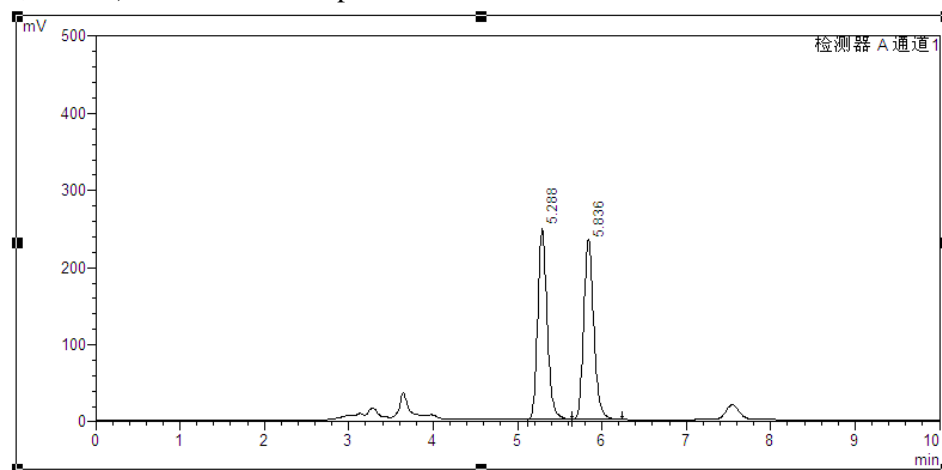

峰表

| 峰# | 保留时间  | 面积      | 高度     | 面积 %    | 高度 %    |
|----|-------|---------|--------|---------|---------|
| 1  | 5.288 | 1928695 | 246904 | 49.911  | 51.470  |
| 2  | 5.836 | 1935557 | 232803 | 50.089  | 48.530  |
| 总计 |       | 3864252 | 479706 | 100.000 | 100.000 |

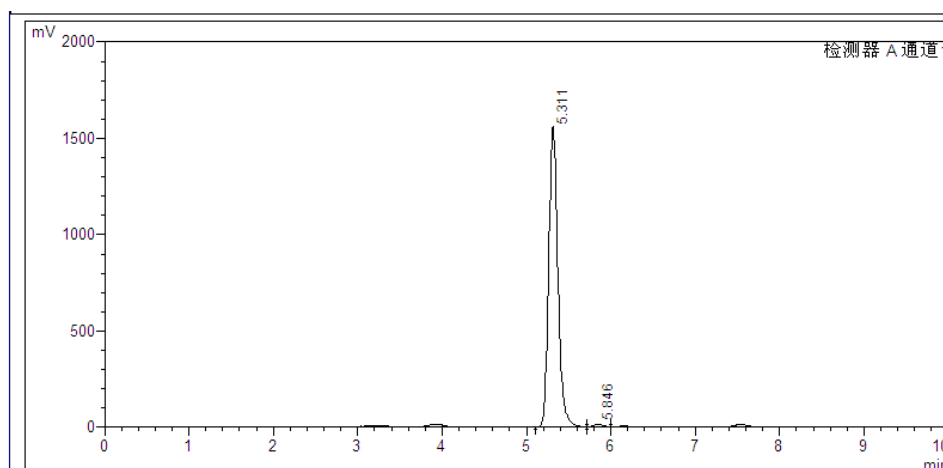

峰表

| 峰# | 保留时间  | 面积       | 高度      | 面积 %    | 高度 %    |
|----|-------|----------|---------|---------|---------|
| 1  | 5.311 | 11863346 | 1557628 | 99.014  | 99.075  |
| 2  | 5.846 | 118083   | 14544   | 0.986   | 0.925   |
| 总计 |       | 11981429 | 1572172 | 100.000 | 100.000 |

**Methyl (1*S*, 2*R*)-2-(4-chlorophenyl)-1-phenyl-2-(4,4,5,5-tetramethyl-1,3,2-dioxaborolan-2-yl)cyclopropane-1-carboxylate (3ac)**

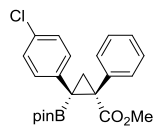

White solid, 99% ee (Daicel AD-H 0.46\*25 cm, *n*-Hexane : *i*-PrOH 98 : 2, 1 mL/min, 35 °C, 3.2 Mpa,  $t_R$  (minor) = 6.310 min,  $t_R$  (major) = 5.366 min);  $^1\text{H NMR}$  (400 MHz,  $\text{CDCl}_3$ )  $\delta$  7.13 – 7.05 (m, 7H), 7.00 – 6.97 (m, 2H), 3.67 (s, 3H), 2.12 (d,  $J$  = 4.4 Hz, 1H), 2.08 (d,  $J$  = 4.4 Hz, 1H), 1.24 (s, 6H), 1.23 (s, 6H) ppm.  $^{13}\text{C NMR}$  (100 MHz,  $\text{CDCl}_3$ )  $\delta$  175.1, 136.3, 134.7, 131.8, 131.4 (2C), 131.3 (2C), 127.8 (2C), 127.6 (2C), 127.1, 84.0 (2C), 53.0, 40.4, 25.0 (2C), 24.8 (2C), 22.0 ppm [Note: the carbon attached to boron was not observed due to quadrupole broadening caused by the  $^{11}\text{B}$  nucleus]. **ESI-HR** calcd for  $\text{C}_{23}\text{H}_{26}\text{BClO}_4\text{Na}^+$  ( $[\text{M}+\text{Na}]^+$ ) 435.15049, found 435.15002. IR  $\tilde{\nu}$  ( $\text{cm}^{-1}$ ) 1712, 1320, 1146. **M. P.** 157.4 – 158.0 °C. **Yield** = 95%.  $[\alpha]_D^{20}$  = 8.6 ( $c$  = 1, MeOH) for a 99% ee sample.

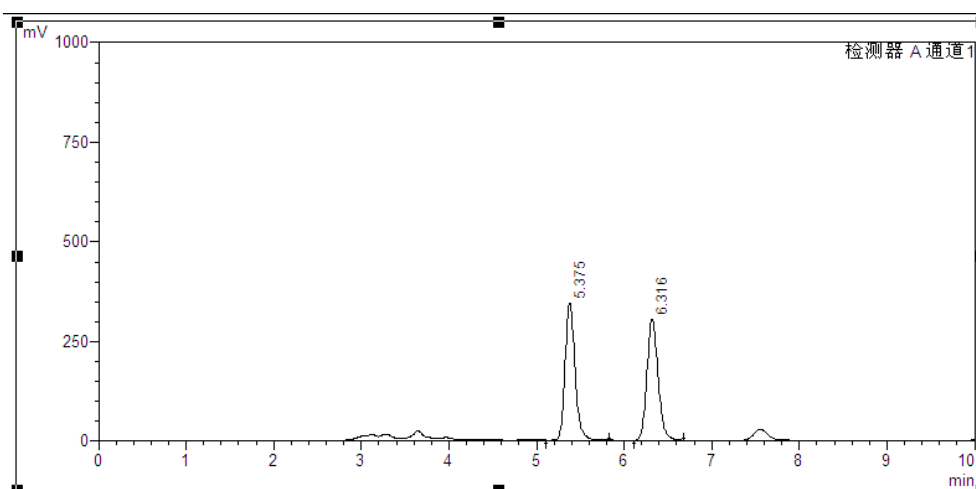

峰表

| 峰# | 保留时间  | 面积      | 高度     | 面积 %    | 高度 %    |
|----|-------|---------|--------|---------|---------|
| 1  | 5.375 | 2759908 | 345169 | 50.276  | 53.051  |
| 2  | 6.316 | 2729654 | 305463 | 49.724  | 46.949  |
| 总计 |       | 5489562 | 650632 | 100.000 | 100.000 |

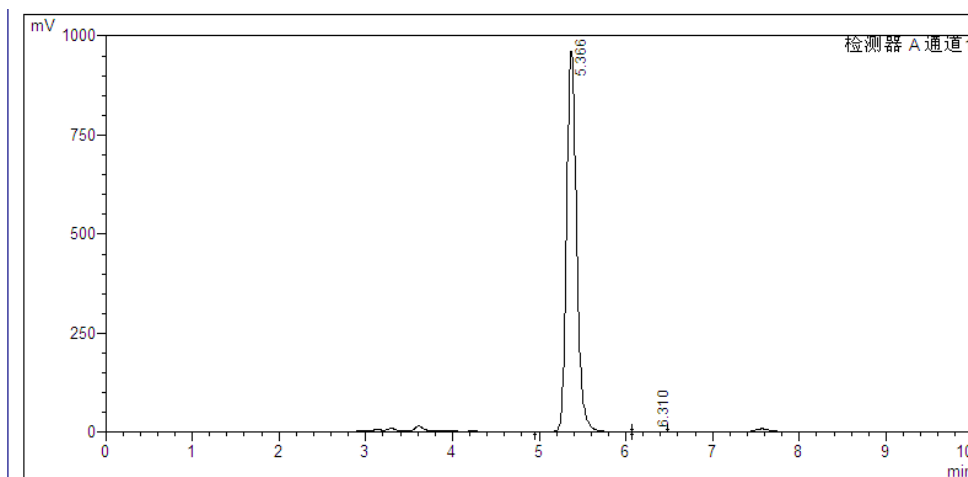

峰表

| 峰# | 保留时间  | 面积      | 高度     | 面积 %    | 高度 %    |
|----|-------|---------|--------|---------|---------|
| 1  | 5.366 | 7715164 | 960341 | 99.887  | 99.884  |
| 2  | 6.310 | 8725    | 1116   | 0.113   | 0.116   |
| 总计 |       | 7723889 | 961457 | 100.000 | 100.000 |

**Methyl (1*S*,2*R*)-2-(3-fluorophenyl)-1-phenyl-2-(4,4,5,5-tetramethyl-1,3,2-dioxaborolan-2-yl)cyclopropane-1-carboxylate (3ad)**

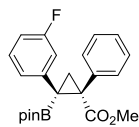

White solid, 94% ee (Daicel AD-H 0.46\*25 cm, *n*-Hexane : *i*-PrOH 99: 1, 1 mL/min, 35 °C, 3.2 Mpa,  $t_R$  (minor) = 5.371 min,  $t_R$  (major) = 6.753 min);  $^1\text{H NMR}$  (400 MHz,  $\text{CDCl}_3$ )  $\delta$  7.14 – 7.02 (m, 5H), 7.00 – 6.92 (m, 3H), 6.67 – 6.62 (m, 1H), 3.68 (s, 3H), 2.14 (d,  $J = 4.4$  Hz, 1H), 2.09 (d,  $J = 4.4$  Hz, 1H), 1.26 (s, 6H), 1.25 (s, 6H) ppm.  $^{13}\text{C NMR}$  (100 MHz,  $\text{CDCl}_3$ )  $\delta$  175.0, 162.4 (d,  $J = 243$  Hz), 140.4 (d,  $J = 7$  Hz), 134.7, 131.3 (2C), 128.9 (d,  $J = 8$  Hz), 127.6 (2C), 127.0, 125.6 (d,  $J = 3$  Hz), 117.0 (d,  $J = 21$  Hz), 113.0 (d,  $J = 21$  Hz), 84.0 (2C), 53.0, 40.6, 25.0 (2C), 24.8 (2C), 21.9 ppm [Note: the carbon attached to boron was not observed due to quadrupole broadening caused by the  $^{11}\text{B}$  nucleus].  $^{19}\text{F NMR}$  (376 MHz,  $\text{CDCl}_3$ )  $\delta$  -114.58 ppm. **ESI-HR** calcd for  $\text{C}_{23}\text{H}_{26}\text{BF}_4\text{Na}^+$  ( $[\text{M}+\text{Na}]^+$ ) 419.18004, found 419.18005. **IR**  $\tilde{\nu}$  ( $\text{cm}^{-1}$ ) 1712, 1323, 1142. **M. P.** 146.4 – 146.4 °C. **Yield** = 82%.  $[\alpha]_D^{20} = 9.8$  ( $c = 1.3$ , MeOH) for a 94% ee sample.

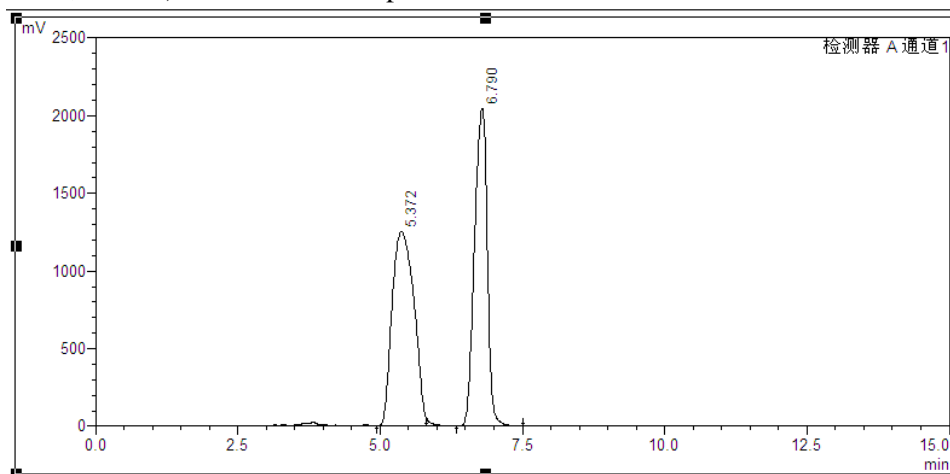

峰表

| 峰# | 保留时间  | 面积       | 高度      | 面积 %    | 高度 %    |
|----|-------|----------|---------|---------|---------|
| 1  | 5.372 | 33489215 | 1252383 | 51.233  | 37.974  |
| 2  | 6.790 | 31877900 | 2045649 | 48.767  | 62.026  |
| 总计 |       | 65367116 | 3298032 | 100.000 | 100.000 |

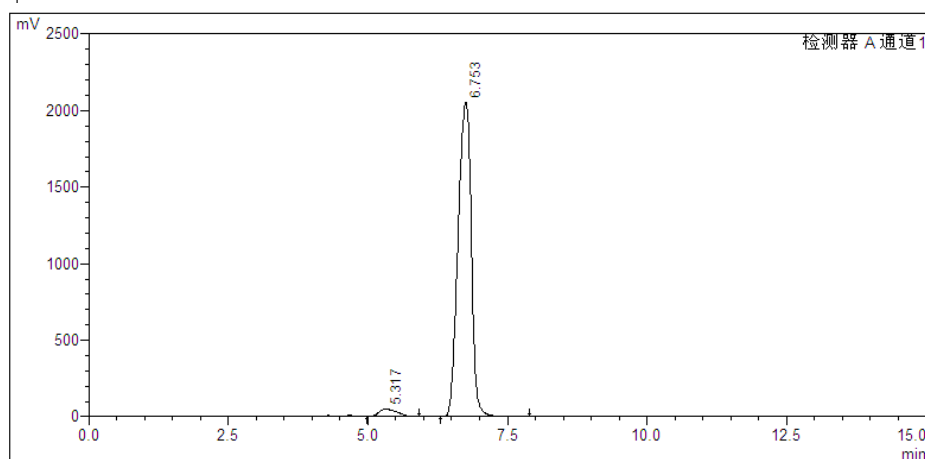

峰表

| 峰# | 保留时间  | 面积       | 高度      | 面积 %    | 高度 %    |
|----|-------|----------|---------|---------|---------|
| 1  | 5.317 | 1041580  | 46757   | 2.993   | 2.228   |
| 2  | 6.753 | 33759475 | 2051859 | 97.007  | 97.772  |
| 总计 |       | 34801055 | 2098616 | 100.000 | 100.000 |

**Methyl (1S, 2R)-2-(3,5-bis(trifluoromethyl)phenyl)-1-phenyl-2-(4,4,5,5-tetramethyl-1,3,2-dioxaborolan-2-yl) cyclopropane-1-carboxylate (3ae)**

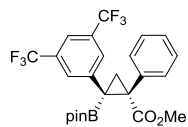

Colorless oil, 86% ee (Daicel AD-H 0.46\*25 cm, *n*-Hexane : *i*-PrOH 99: 1, 1 mL/ min, 35 °C, 3.3 Mpa,  $t_R$  (minor) = 3.532 min,  $t_R$  (major) = 4.071 min);  $^1\text{H}$  NMR (400 MHz,  $\text{CDCl}_3$ )  $\delta$  7.53 (s, 2H), 7.44 (s, 1H), 7.10 – 7.00 (m, 5H), 3.71 (s, 3H), 2.23 (d,  $J$  = 4.8 Hz, 1H), 2.17 (d,  $J$  = 4.8 Hz, 1H), 1.27 (s, 6H), 1.25 (s, 6H) ppm.  $^{13}\text{C}$  NMR (100 MHz,  $\text{CDCl}_3$ )  $\delta$  174.7, 140.9, 133.8, 131.0 (2C), 130.6 (F-C-C,  $J$  = 33 Hz, 2C), 130.3 (broad peak), 127.9 (2C), 127.5, 123.4 (F-C,  $J$  = 271 Hz, 2C), 119.8 (F-C-C-C,  $J$  = 4 Hz), 84.4 (2C), 53.2, 41.1, 25.1 (2C), 24.6 (2C), 21.8 ppm [Note: the carbon attached to boron was not observed due to quadrupole broadening caused by the  $^{11}\text{B}$  nucleus].  $^{19}\text{F}$  NMR (376 MHz,  $\text{CDCl}_3$ )  $\delta$  -63.10 ppm. **ESI-HR** calcd for  $\text{C}_{25}\text{H}_{25}\text{BF}_6\text{O}_4\text{Na}^+$  ( $[\text{M}+\text{Na}]^+$ ) 537.16423, found 537.16553; **IR**  $\tilde{\nu}$  ( $\text{cm}^{-1}$ ) 1716, 1320, 1136; **Yield** = 75%.  $[\alpha]_D^{20}$  = 32.0 ( $c$  = 0.5, MeOH) for a 86% ee sample.

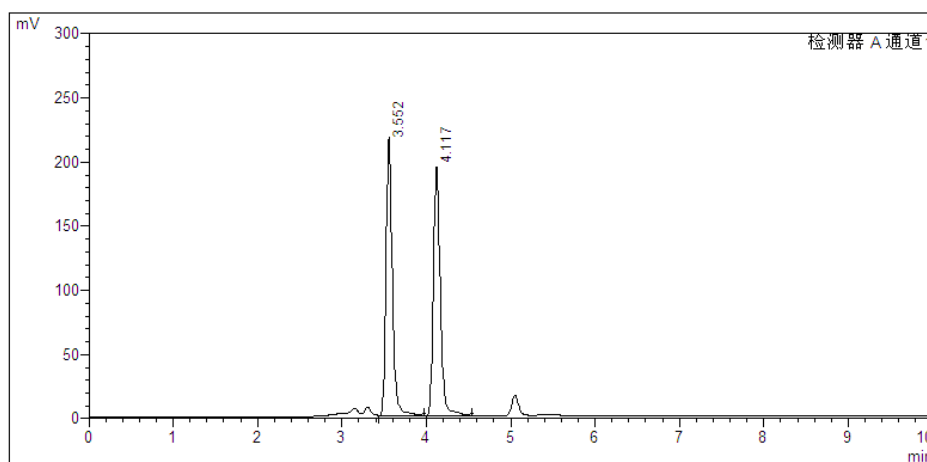

检测器 A Ch1 230nm

| 峰# | 保留时间  | 面积      | 高度     | 面积 %    | 高度 %    |
|----|-------|---------|--------|---------|---------|
| 1  | 3.552 | 1133781 | 216935 | 50.490  | 52.820  |
| 2  | 4.117 | 1111792 | 193767 | 49.510  | 47.180  |
| 总计 |       | 2245573 | 410702 | 100.000 | 100.000 |

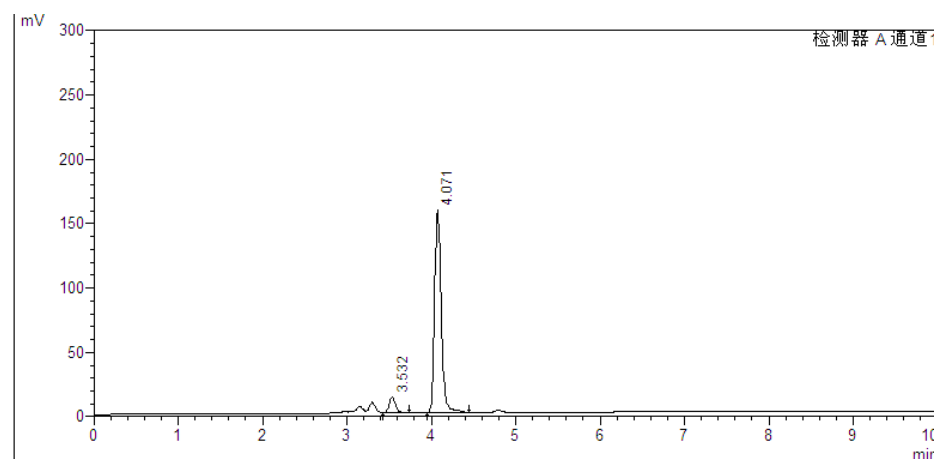

检测器 A Ch1 230nm

| 峰# | 保留时间  | 面积     | 高度     | 面积 %    | 高度 %    |
|----|-------|--------|--------|---------|---------|
| 1  | 3.532 | 63490  | 12260  | 6.801   | 7.234   |
| 2  | 4.071 | 870042 | 157210 | 93.199  | 92.766  |
| 总计 |       | 933532 | 169470 | 100.000 | 100.000 |

**Methyl(1*S*,2*R*)-1-phenyl-2-(4,4,5,5-tetramethyl-1,3,2-dioxaborolan-2-yl)-2-(*p*-tolyl)cyclopropane-1-carboxylate (3af)**

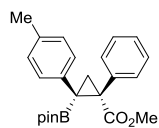

White solid, 98% ee (Daicel OD-H 0.46\*25 cm, *n*-Hexane : *i*-PrOH 99.5: 0.5, 1 mL/ min, 35 °C, 3.9 Mpa,  $t_R$  (minor) = 8.213 min,  $t_R$  (major) = 7.417 min);  $^1\text{H}$  NMR (400 MHz,  $\text{CDCl}_3$ )  $\delta$  7.15 – 7.12 (m, 2H), 7.08 – 7.00 (m, 5H), 6.83 – 6.81(m, 2H), 3.66 (s, 3H), 2.14 – 2.13(m, 4H), 2.08 – 2.07(m,1H), 1.25 (s, 6H), 1.23 (s, 6H) ppm.  $^{13}\text{C}$  NMR (100 MHz,  $\text{CDCl}_3$ )  $\delta$  175.3, 135.4, 135.3, 134.2, 131.6 (2C), 129.8 (2C), 128.4 (2C), 127.4 (2C), 126.8, 83.8 (2C), 52.8, 40.2, 25.0 (2C), 24.8 (2C), 22.0, 21.1 ppm [Note: the carbon attached to boron was not observed due to quadrupole broadening caused by the  $^{11}\text{B}$  nucleus]. **M. P.** 124.0 – 124.2 °C. **Yield** = 91%.

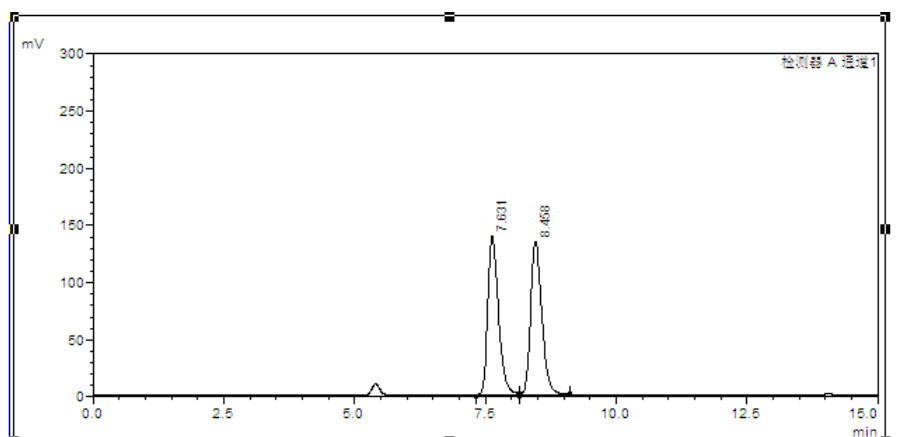

峰表

| 峰# | 保留时间  | 面积      | 高度     | 面积 %    | 高度 %    |
|----|-------|---------|--------|---------|---------|
| 1  | 7.631 | 1982745 | 138780 | 49.698  | 50.859  |
| 2  | 8.458 | 2006846 | 134094 | 50.302  | 49.141  |
| 总计 |       | 3989591 | 272874 | 100.000 | 100.000 |

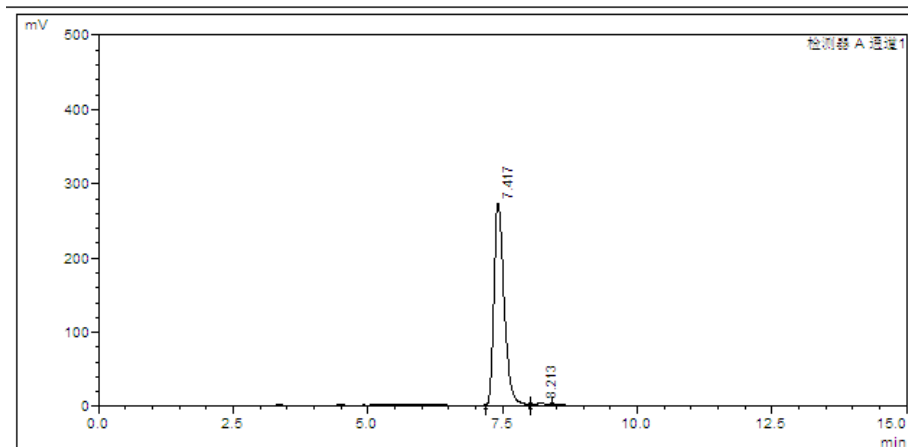

峰表

| 峰# | 保留时间  | 面积      | 高度     | 面积 %    | 高度 %    |
|----|-------|---------|--------|---------|---------|
| 1  | 7.417 | 3592084 | 272341 | 98.968  | 99.131  |
| 2  | 8.213 | 37447   | 2388   | 1.032   | 0.869   |
| 总计 |       | 3629530 | 274729 | 100.000 | 100.000 |

**Methyl (1*S*,2*R*)-2-(4-methoxyphenyl)-1-phenyl-2-(4,4,5,5-tetramethyl-1,3,2-dioxaborolan-2-yl) cyclopropane-1-carboxylate (3a<sub>g</sub>)**

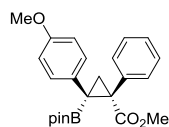

White solid, 98% ee (Daicel OD-H 0.46\*25 cm, *n*-Hexane : *i*-PrOH 99: 1, 1 mL/min, 35 °C, 3.9 Mpa,  $t_R$  (minor) = 7.711 min,  $t_R$  (major) = 6.618 min);  $^1\text{H NMR}$  (400 MHz,  $\text{CDCl}_3$ )  $\delta$  7.14 – 7.00 (m, 7H), 6.57 – 6.55 (m, 2H), 3.66 (s, 3H), 3.65 (s, 3H), 2.11 (d,  $J$  = 4.4 Hz, 1H), 2.07 (d,  $J$  = 4.4 Hz, 1H), 1.25 (s, 6H), 1.23 (s, 6H) ppm.  $^{13}\text{C NMR}$  (100 MHz,  $\text{CDCl}_3$ )  $\delta$  175.3, 157.8, 135.2, 131.6 (2C), 131.0 (2C), 129.4, 127.4 (2C), 126.8, 113.0 (2C), 83.8 (2C), 55.1, 52.8, 40.2, 25.0 (2C), 24.8 (2C), 22.2 ppm [Note: the carbon attached to boron was not observed due to quadrupole broadening caused by the  $^{11}\text{B}$  nucleus]. **ESI-HR** calcd for  $\text{C}_{24}\text{H}_{29}\text{BO}_5\text{Na}^+$  ( $[\text{M}+\text{Na}]^+$ ) 431.20003, found 431.19904. **IR**  $\tilde{\nu}$  ( $\text{cm}^{-1}$ ) 1711, 1320, 1303, 1146. **M. P.** 141.9 – 144.3 °C. **Yield** = 85%.  $[\alpha]_D^{20}$  = 14.1 ( $c$  = 1.48, MeOH) for a 98% ee sample.

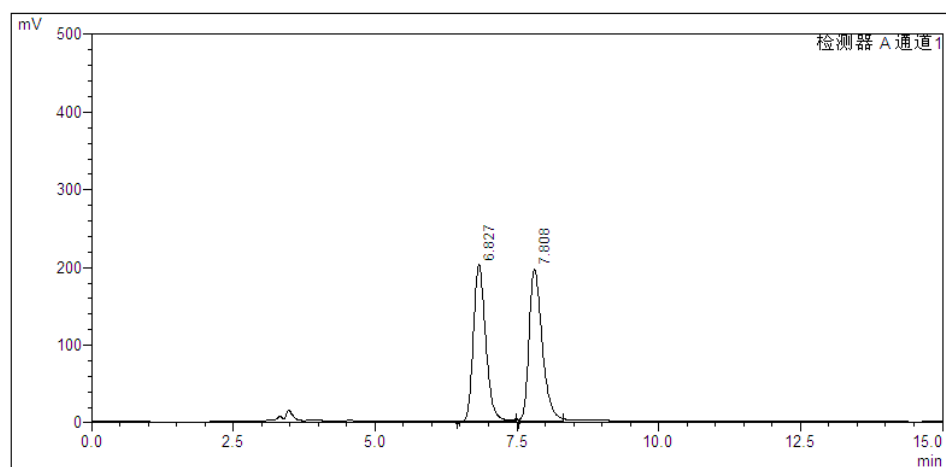

峰表

| 峰# | 保留时间  | 面积      | 高度     | 面积 %    | 高度 %    |
|----|-------|---------|--------|---------|---------|
| 1  | 6.827 | 3076159 | 201827 | 49.017  | 50.779  |
| 2  | 7.808 | 3199595 | 195635 | 50.983  | 49.221  |
| 总计 |       | 6275754 | 397463 | 100.000 | 100.000 |

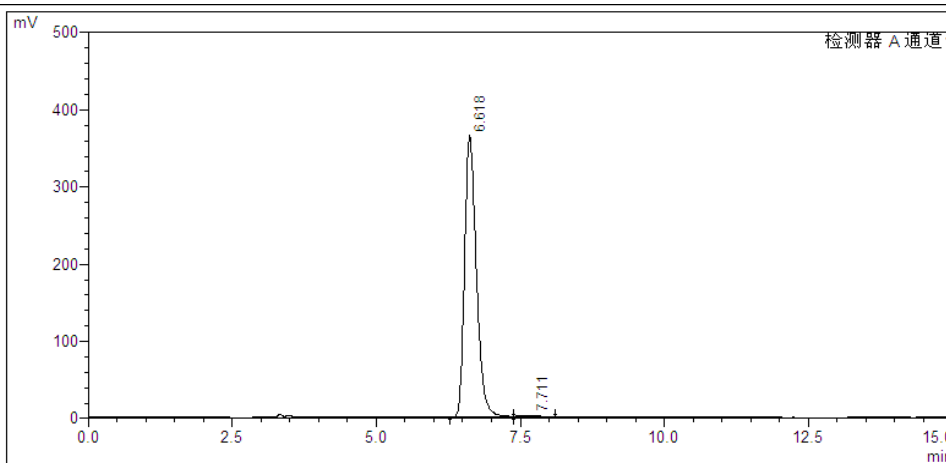

峰表

| 峰# | 保留时间  | 面积      | 高度     | 面积 %    | 高度 %    |
|----|-------|---------|--------|---------|---------|
| 1  | 6.618 | 5208965 | 364541 | 99.060  | 99.512  |
| 2  | 7.711 | 49431   | 1788   | 0.940   | 0.488   |
| 总计 |       | 5258397 | 366329 | 100.000 | 100.000 |



**methyl(1S,2S)-2-hexyl-1-phenyl-2-(4,4,5,5-tetramethyl-1,3,2-dioxaborolan-2-yl)cyclopropane-1-carboxylate**

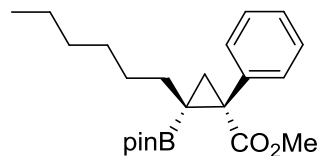

Colorless oil,  $^1\text{H NMR}$  (400 MHz,  $\text{CDCl}_3$ )  $\delta$  7.43 – 7.15 (m, 5H), 3.58 (s, 3H), 1.77 (d,  $J = 3.7$  Hz, 1H), 1.55 (ddd,  $J = 13.8, 11.0, 4.4$  Hz, 1H), 1.33 – 1.29 (m, 1H), 1.32 (s, 6H), 1.31 (s, 6H), 1.24 – 1.02 (m, 8H), 0.81 (t,  $J = 7.1$  Hz, 3H), 0.21 (ddd,  $J = 13.3, 11.3, 5.9$  Hz, 1H).  $^{13}\text{C NMR}$  (100 MHz,  $\text{CDCl}_3$ )  $\delta$  175.5, 136.7, 131.6 (2C), 127.9 (2C), 127.1, 83.5 (2C), 52.6, 38.5, 38.5, 31.9, 29.6, 28.9, 25.3 (2C), 25.2 (2C), 24.9, 22.6, 14.2.

**Preparation of 1,4-dicarbonyl compounds**

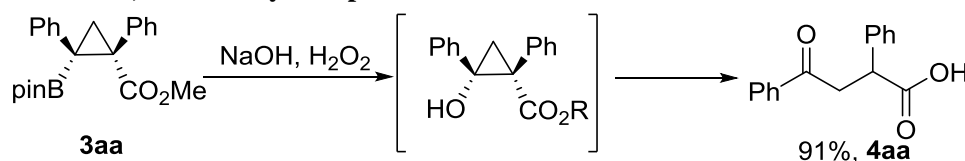

3aa (378mg, 1mmol) was dissolved in THF (6ml), cooled to  $0^\circ\text{C}$  then 3M NaOH (4ml) was added, dropwise followed by 2.1ml 35%  $\text{H}_2\text{O}_2$  solution in  $\text{H}_2\text{O}$  (2ml). After the treatment, the reaction system was concentrated first, and then Add 1M HCl to adjust Ph = 12 – 13, extract the aqueous phase with  $\text{CH}_2\text{Cl}_2$ , combine the organic phases and dry over  $\text{Na}_2\text{SO}_4$  to obtain the product 4aa (205, 0.81 mmol, 91%).

**General procedure:**

**4-oxo-2,4-diphenylbutanoic acid (4aa)**

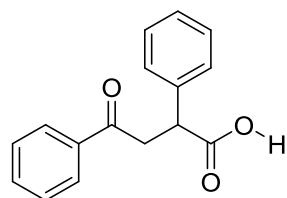

White solid,  $^1\text{H NMR}$  (400 MHz,  $\text{CDCl}_3$ )  $\delta$  7.96 (d,  $J = 7.7$  Hz, 1H), 7.56 (t,  $J = 7.4$  Hz, 1H), 7.45 (t,  $J = 7.6$  Hz, 1H), 7.42 – 7.27 (m, 3H), 4.32 (dd,  $J = 10.1, 4.2$  Hz, 1H), 3.91 (dd,  $J = 18.1, 10.1$  Hz, 1H), 3.29 (dd,  $J = 18.1, 4.2$  Hz, 1H) ppm.  $^{13}\text{C NMR}$  (101 MHz,  $\text{CDCl}_3$ )  $\delta$  197.5, 179.1, 137.8, 136.4, 133.5, 129.1 (2C), 128.7 (2C), 128.2 (2C), 128.1 (2C), 127.9, 46.4, 42.4 ppm. **ESI-HR** calcd for  $\text{C}_{16}\text{H}_{14}\text{O}_3\text{H}^+$  ( $[\text{M}+\text{H}]^+$ ) 255.10156, found 255.10150. **IR**  $\nu$  ( $\text{cm}^{-1}$ ) 1708, 1684. **M. P.** 152.4 – 152.5  $^\circ\text{C}$ . **Yield** = 91%.



NMR Copies of styrenes 2, Cyclopropylboronates 3 and 1,4-dicarbonyl compounds 4aa.

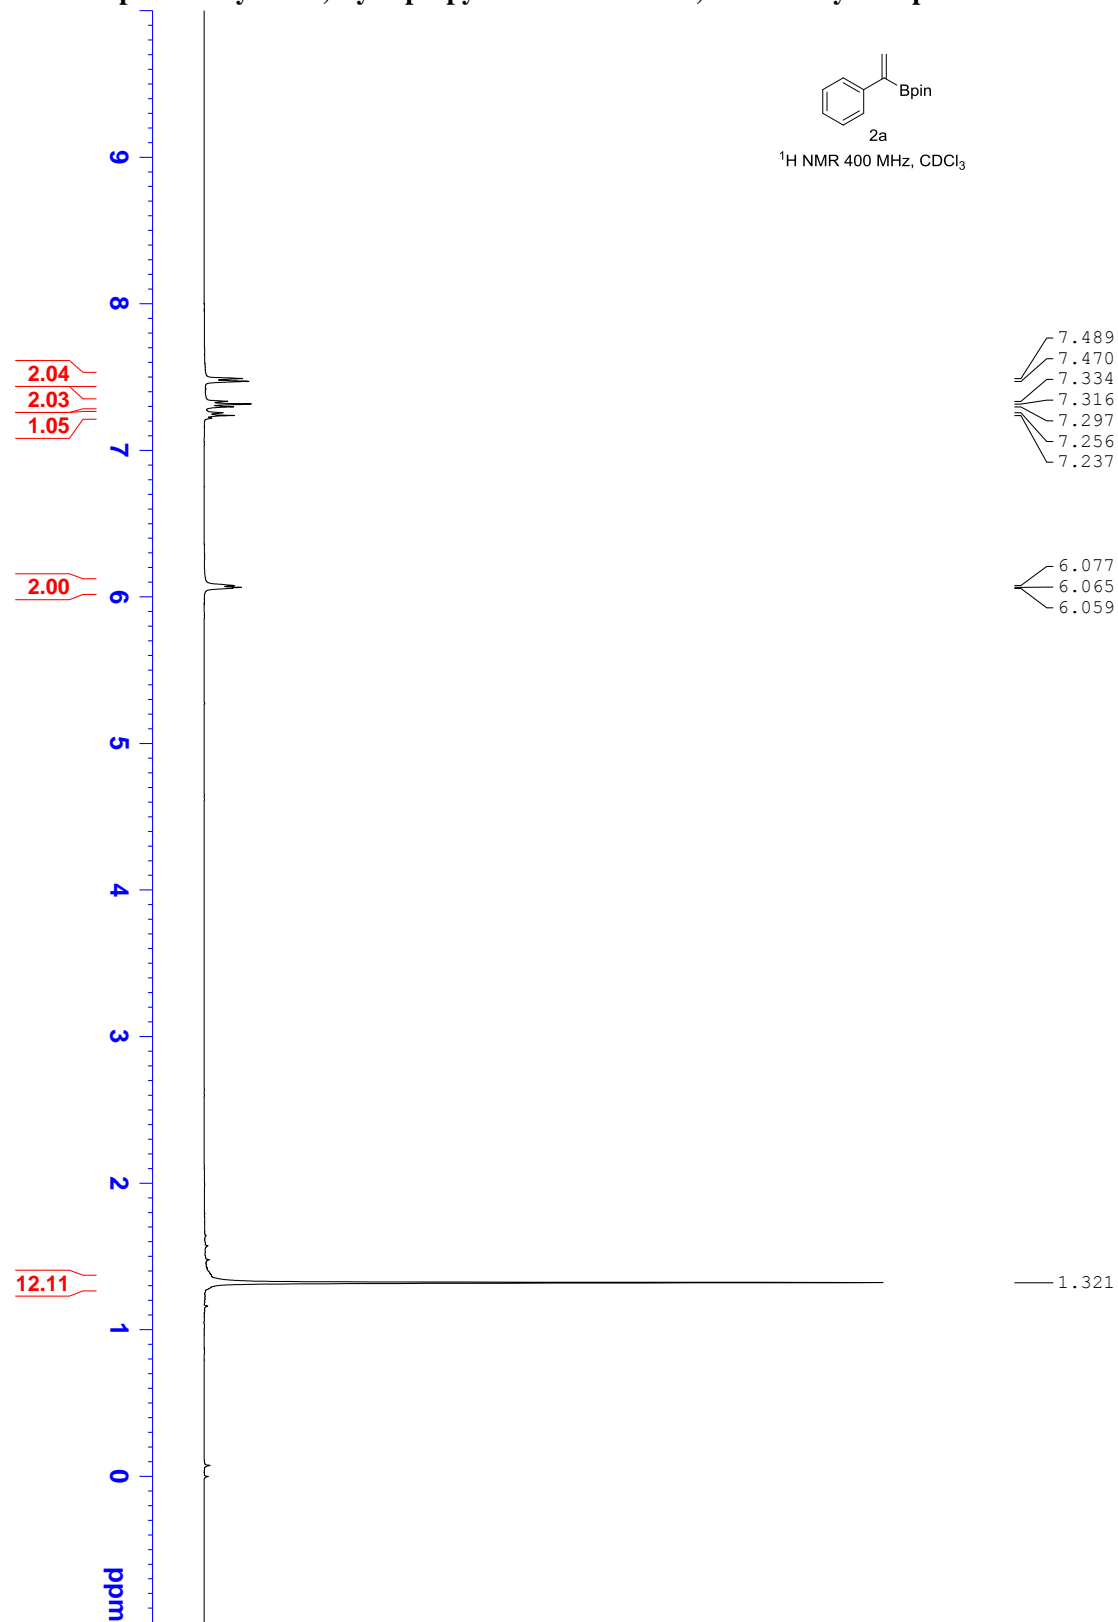

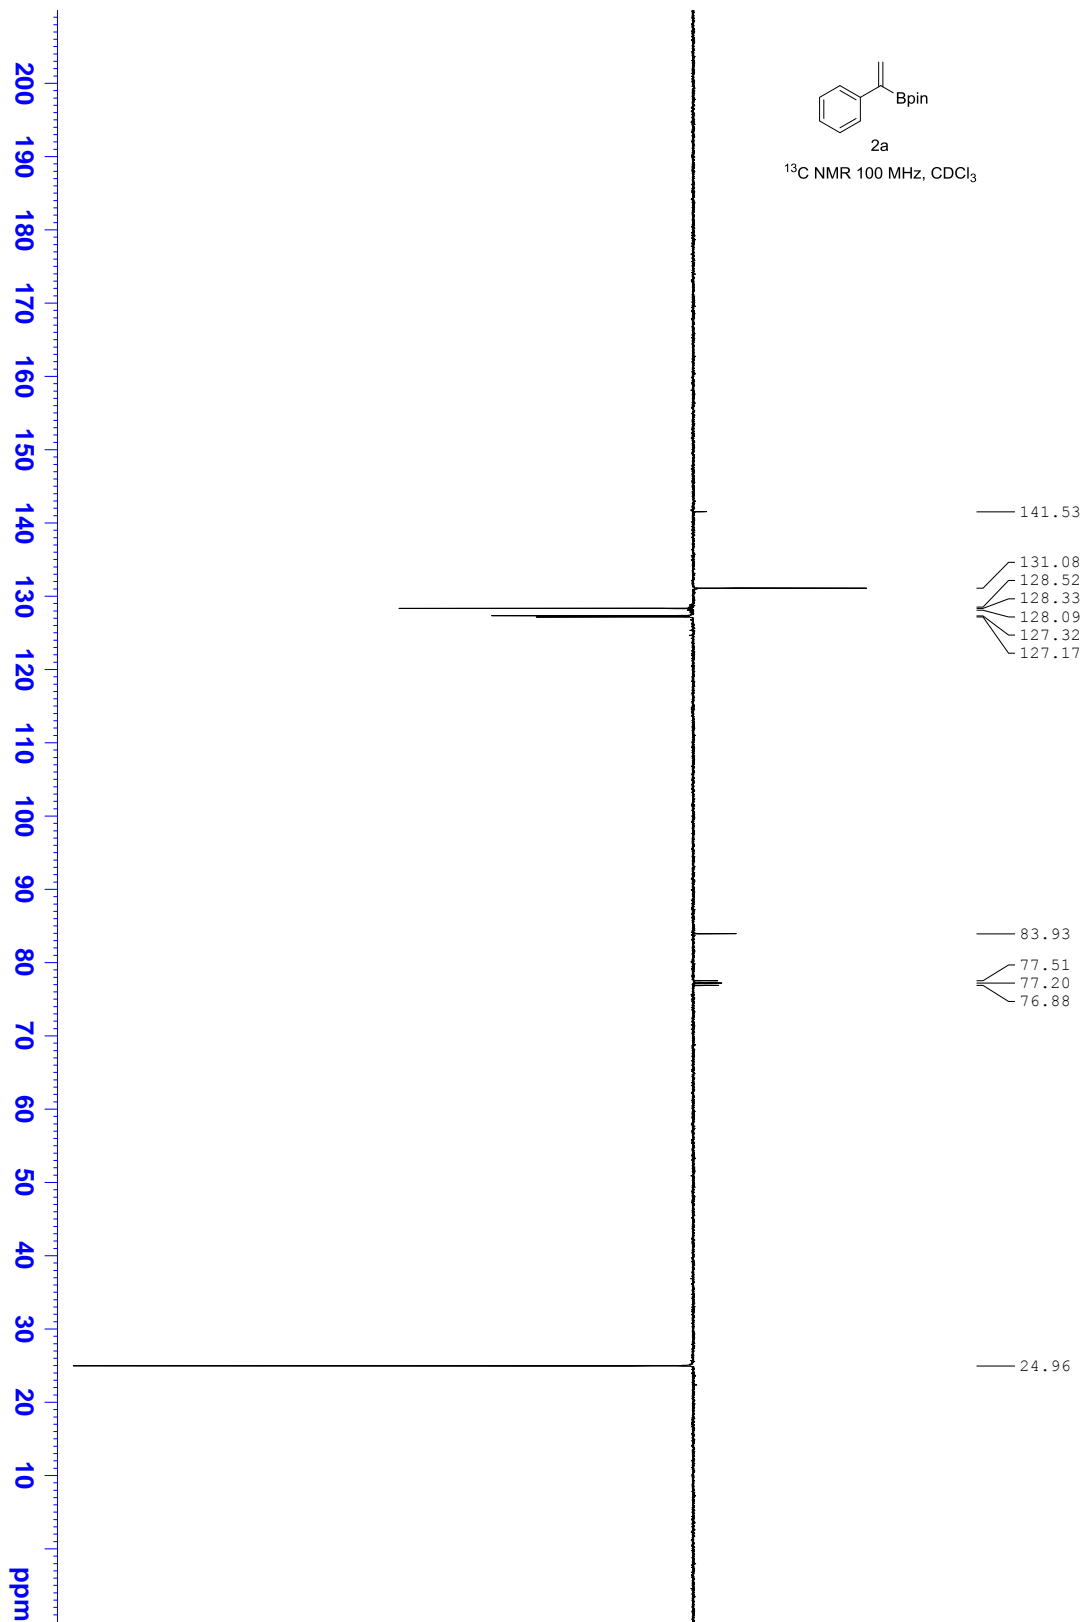

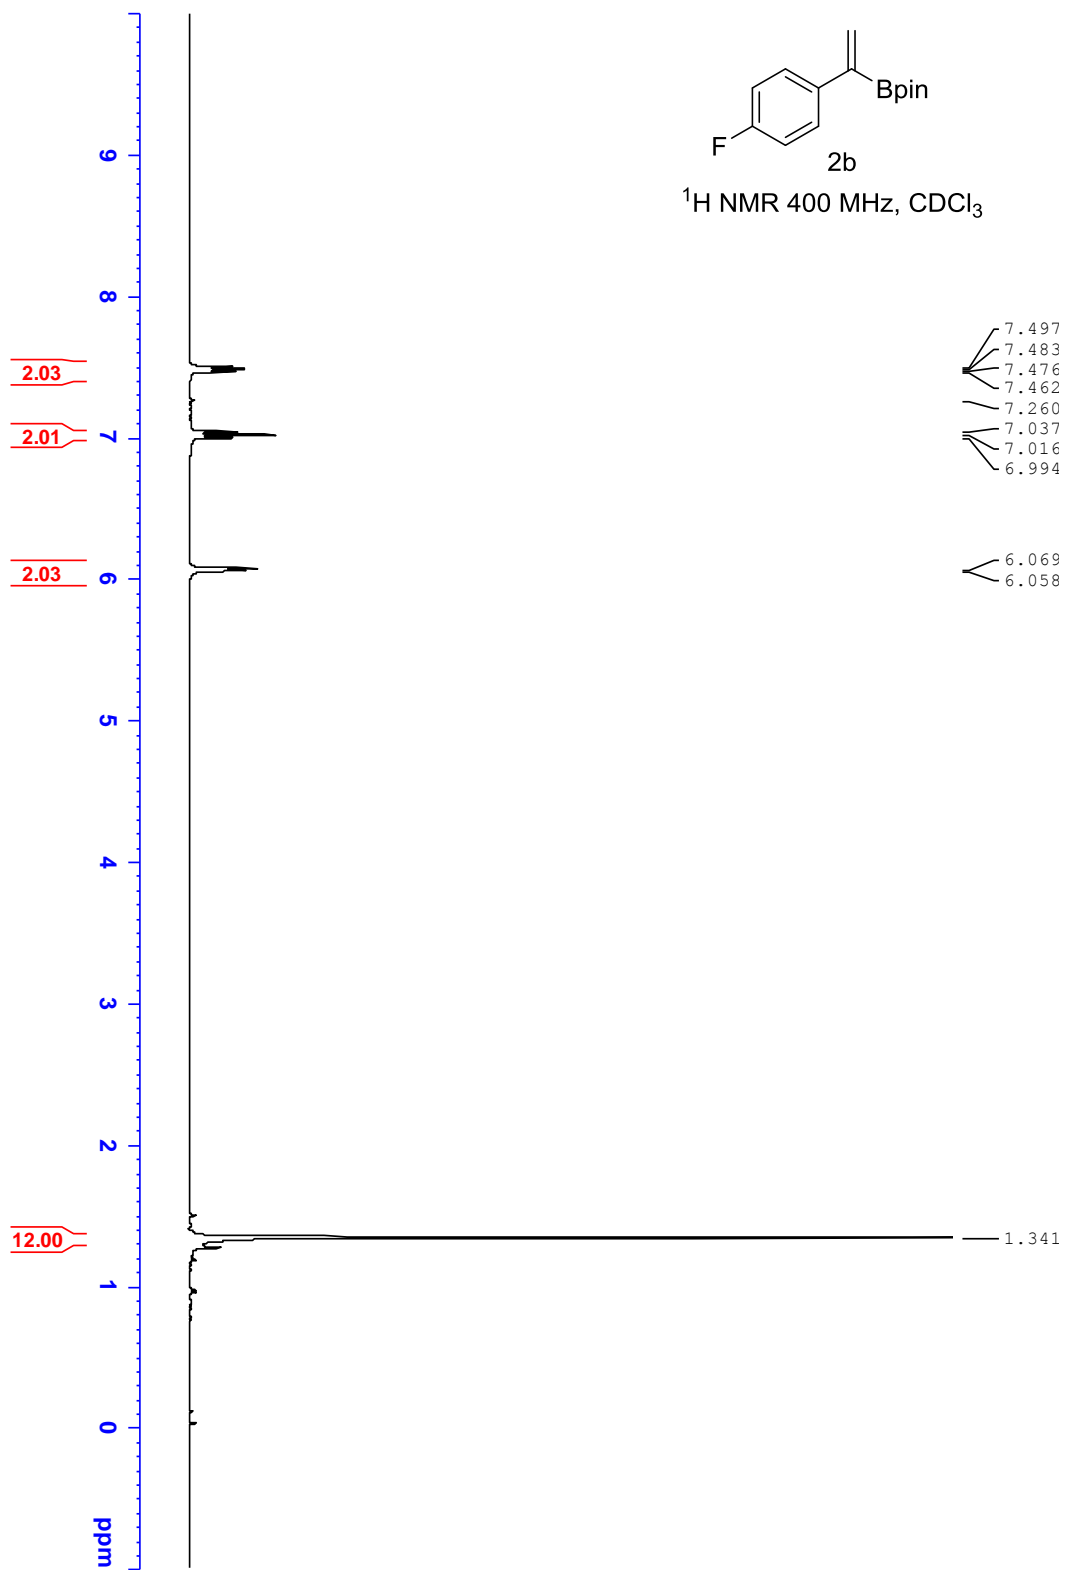

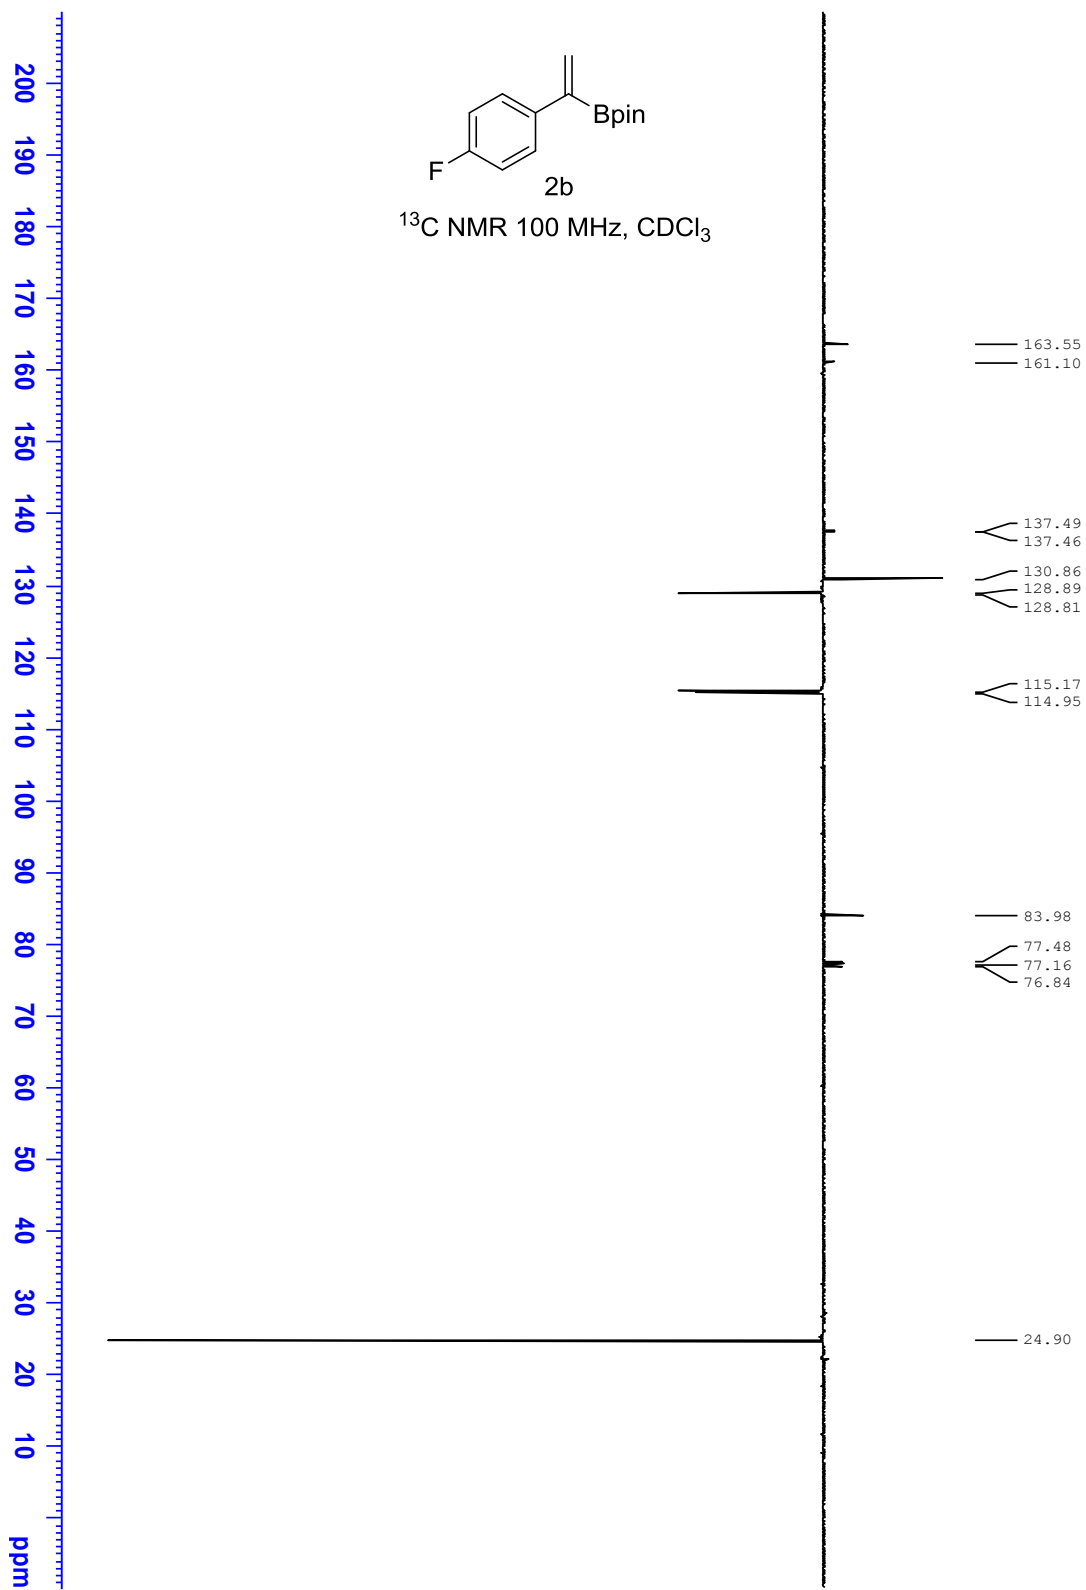

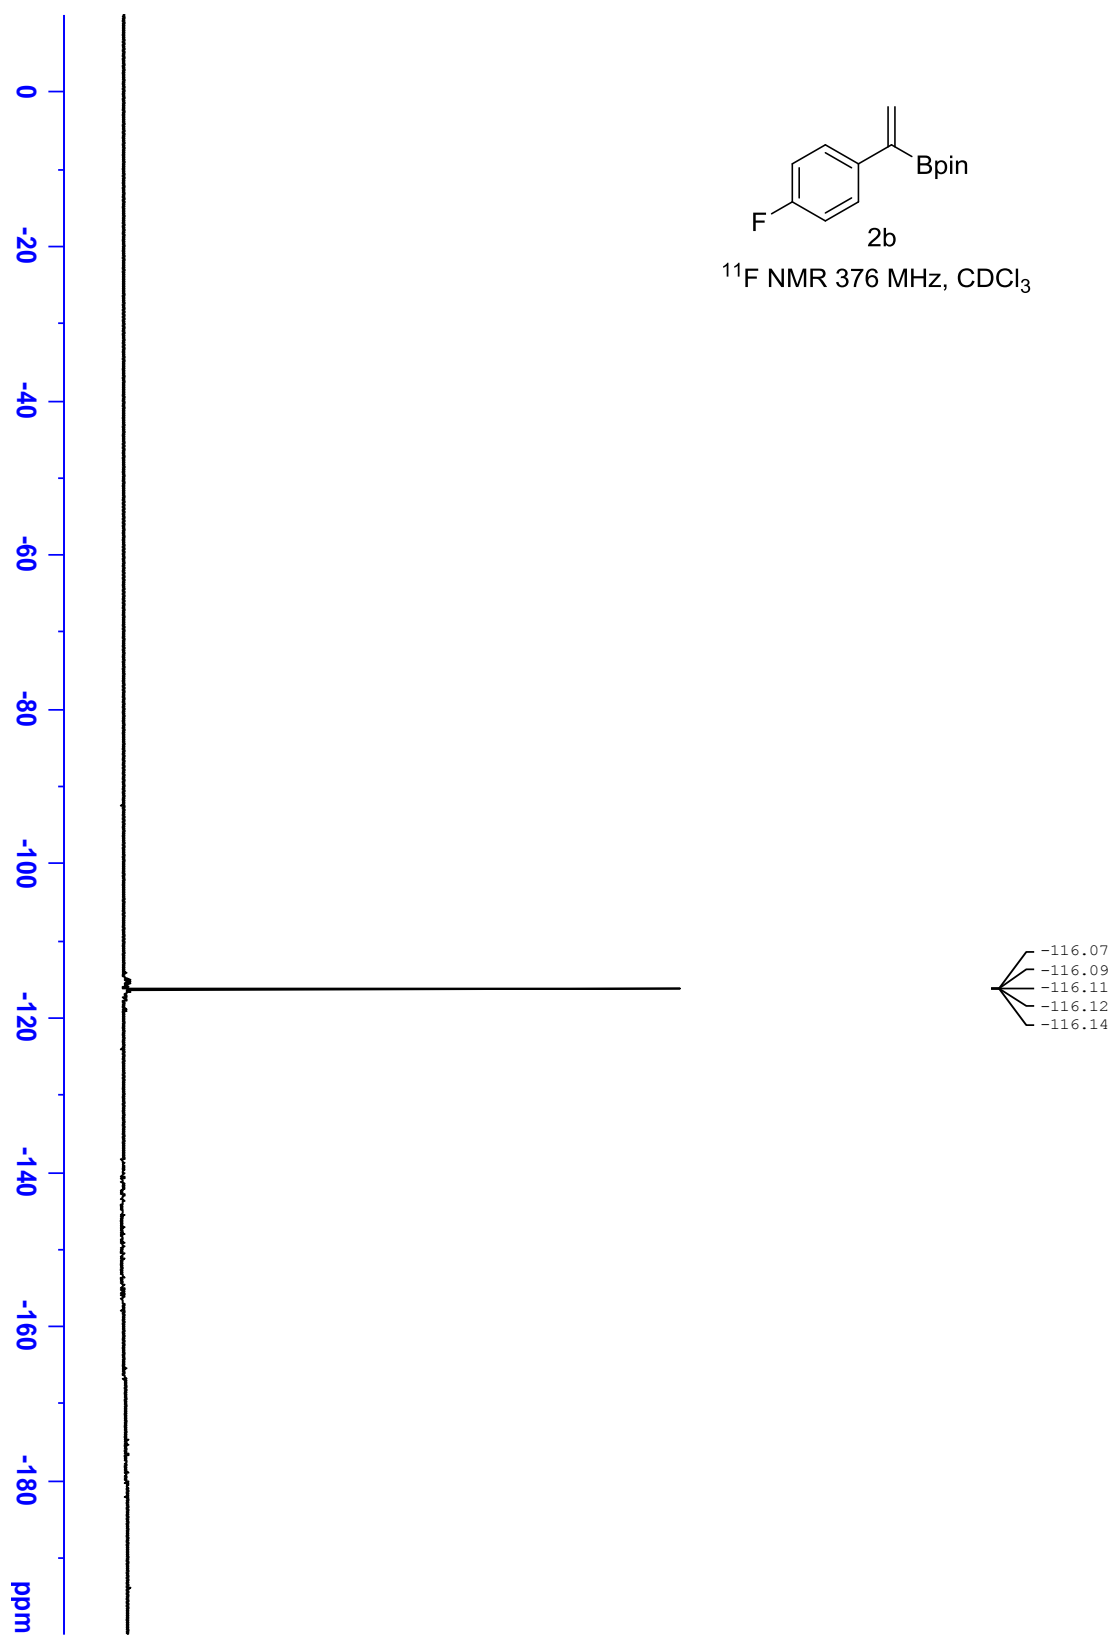

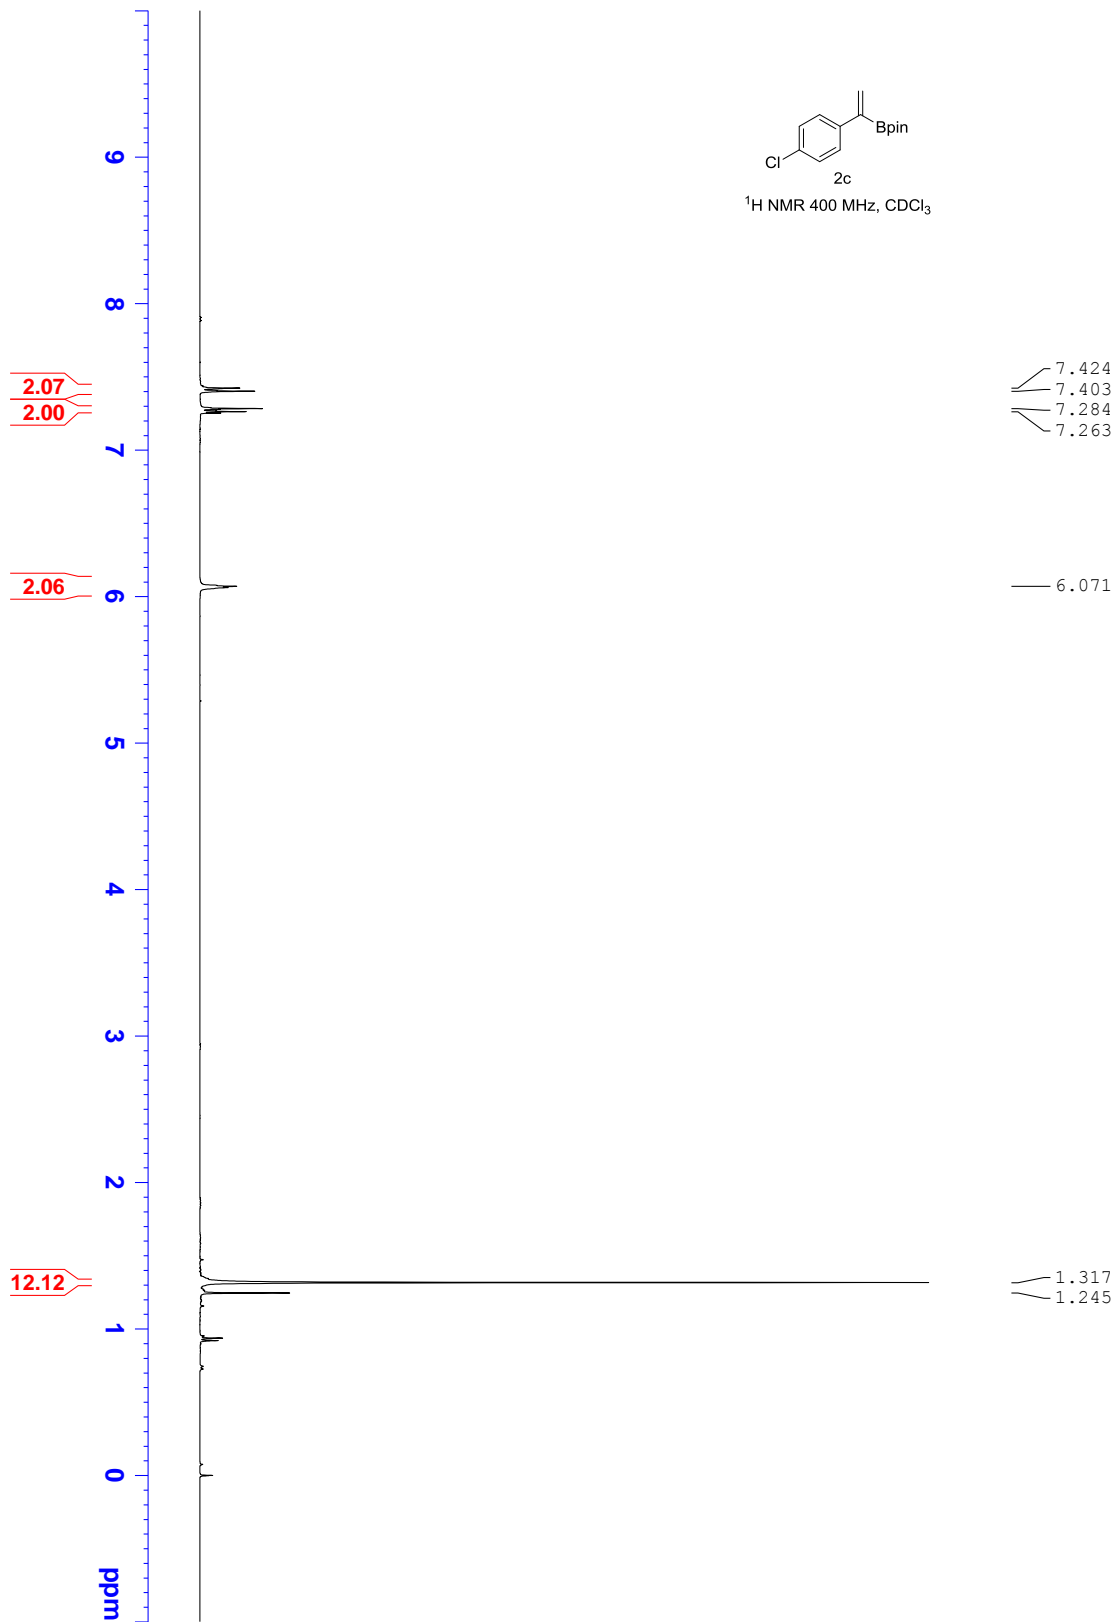

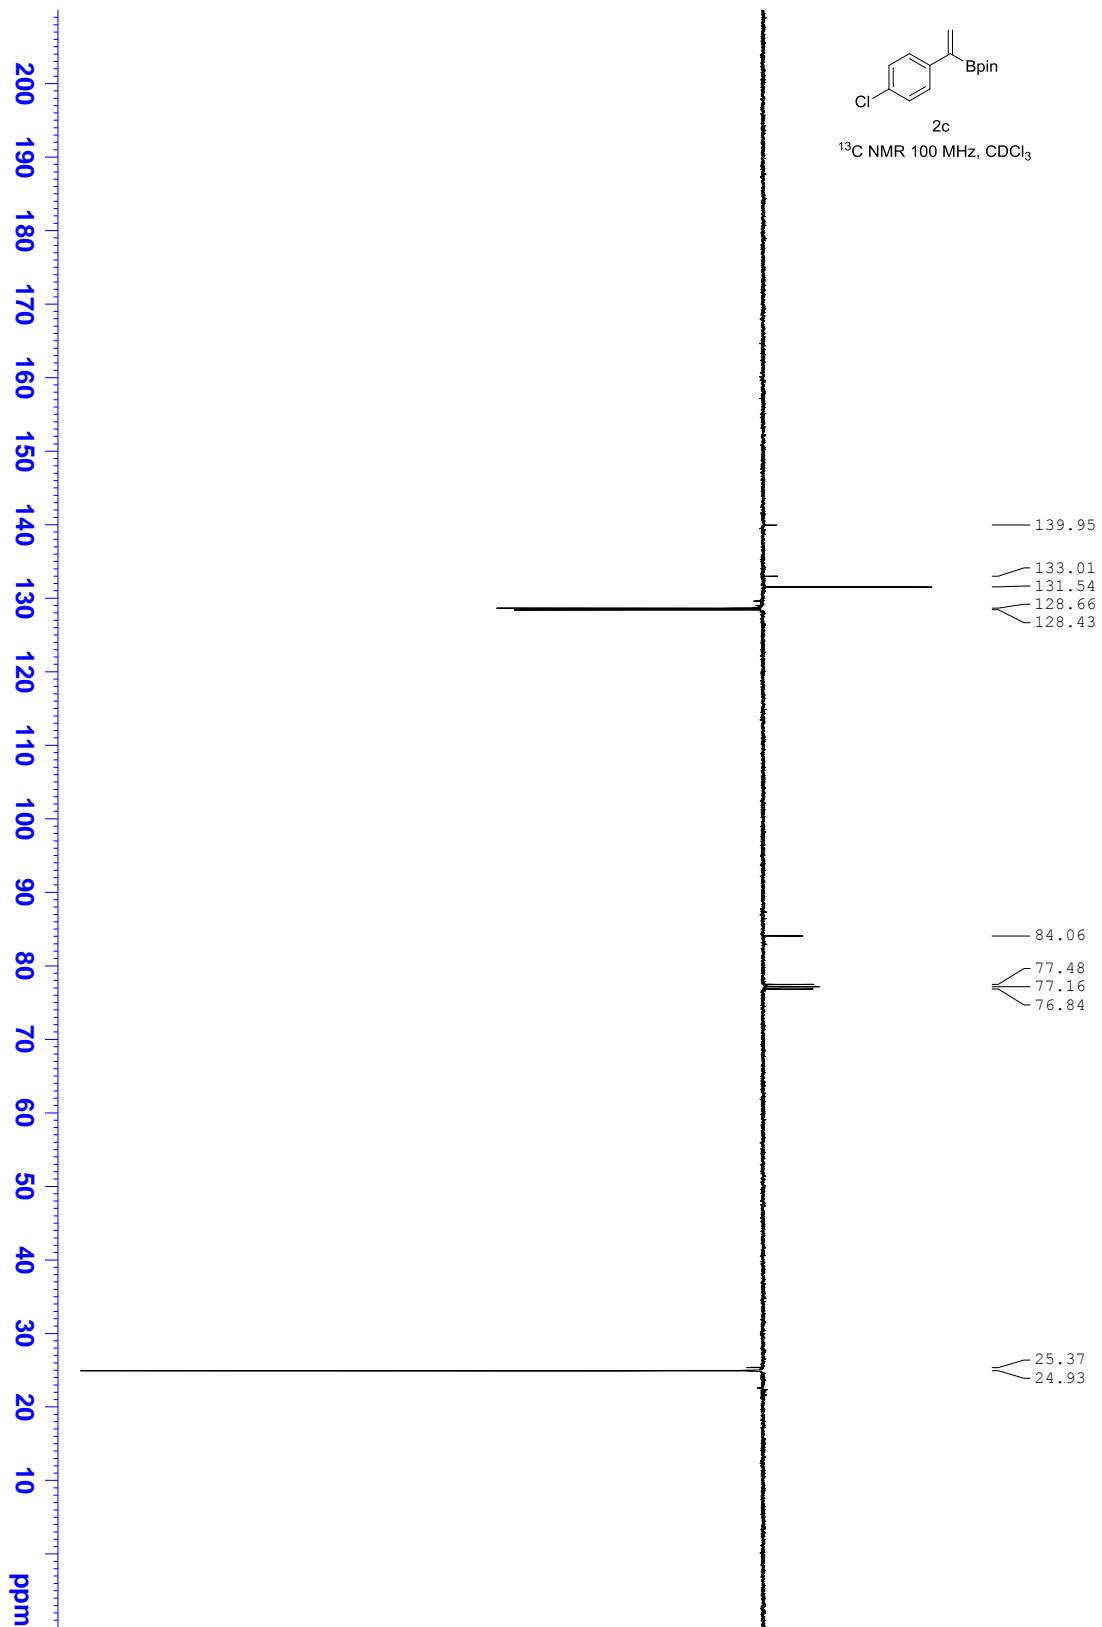

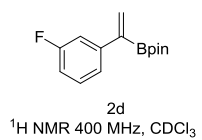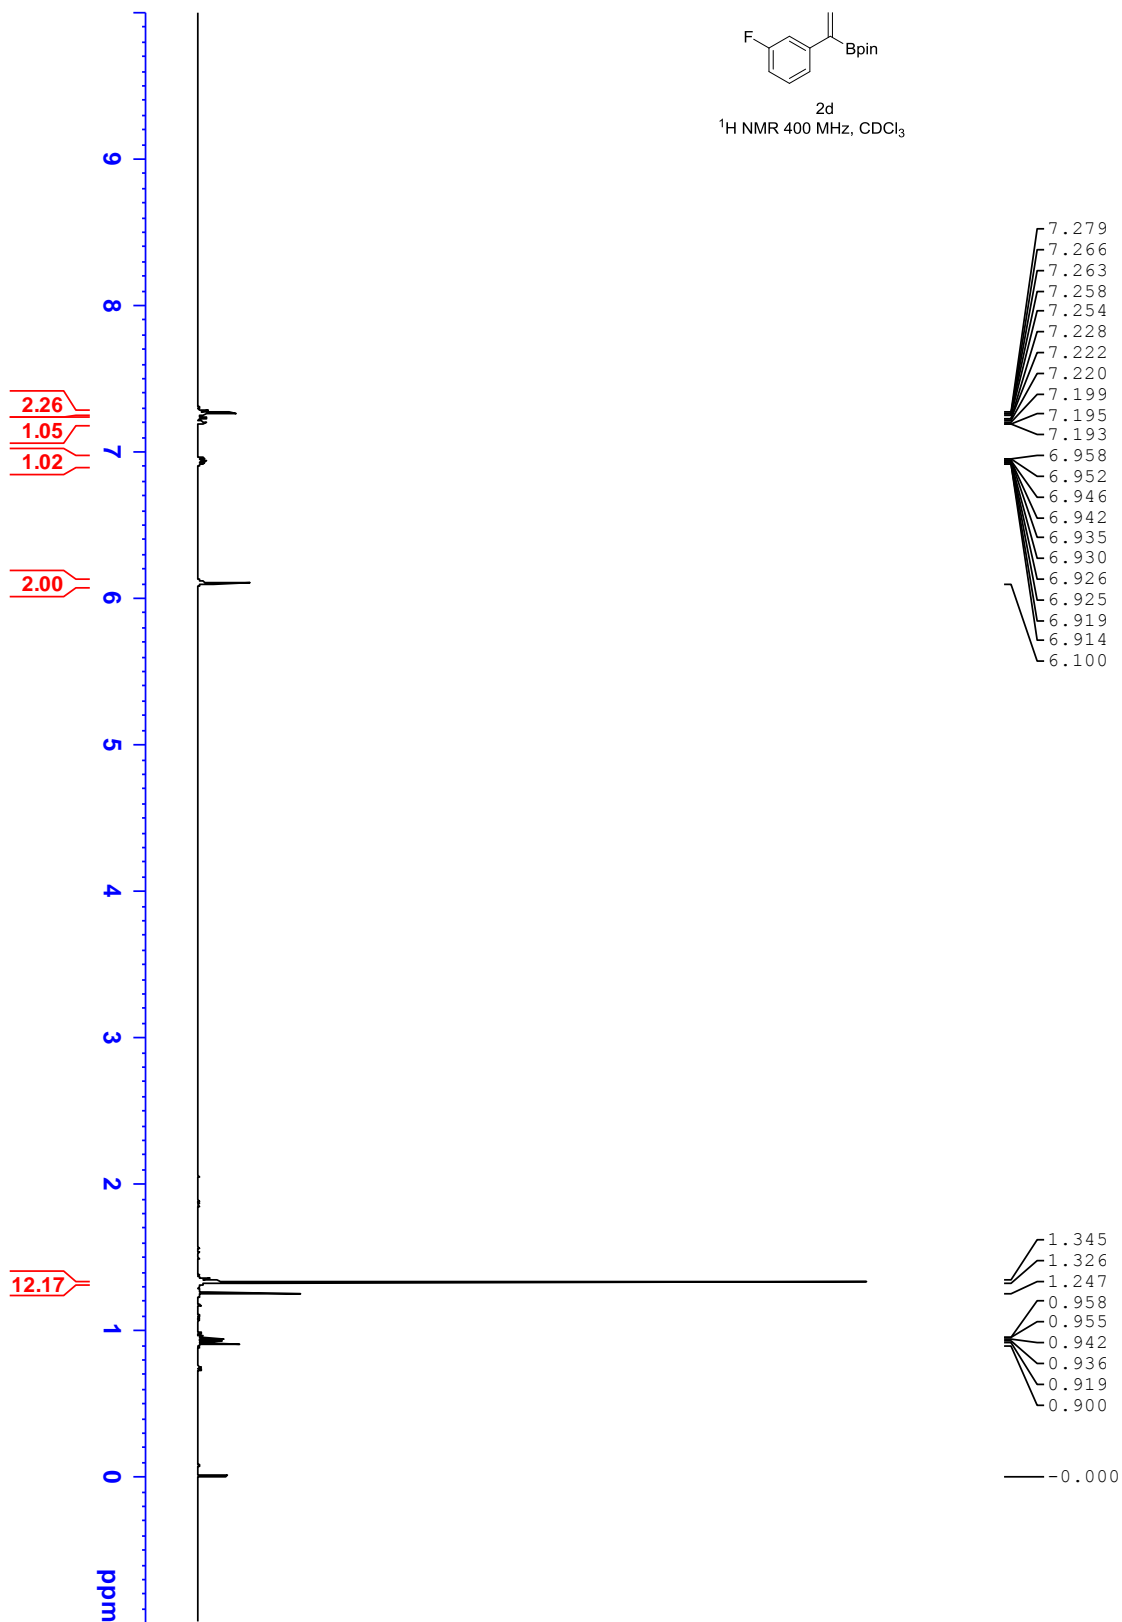



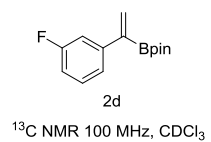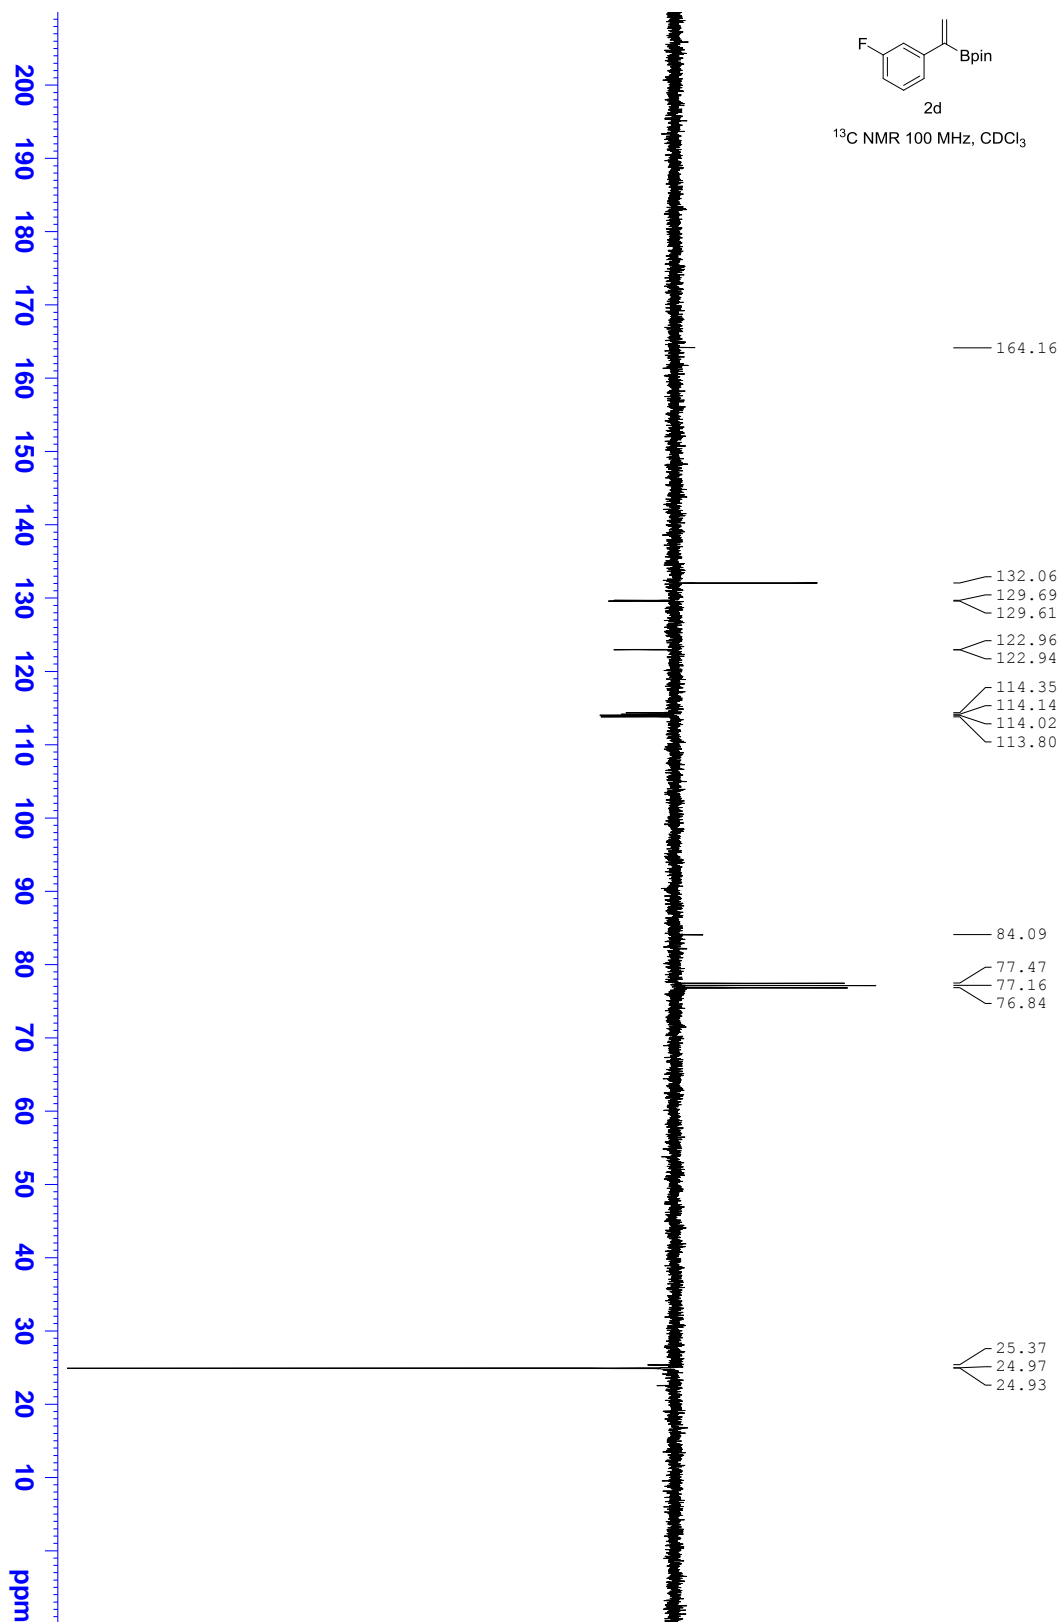

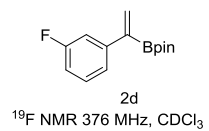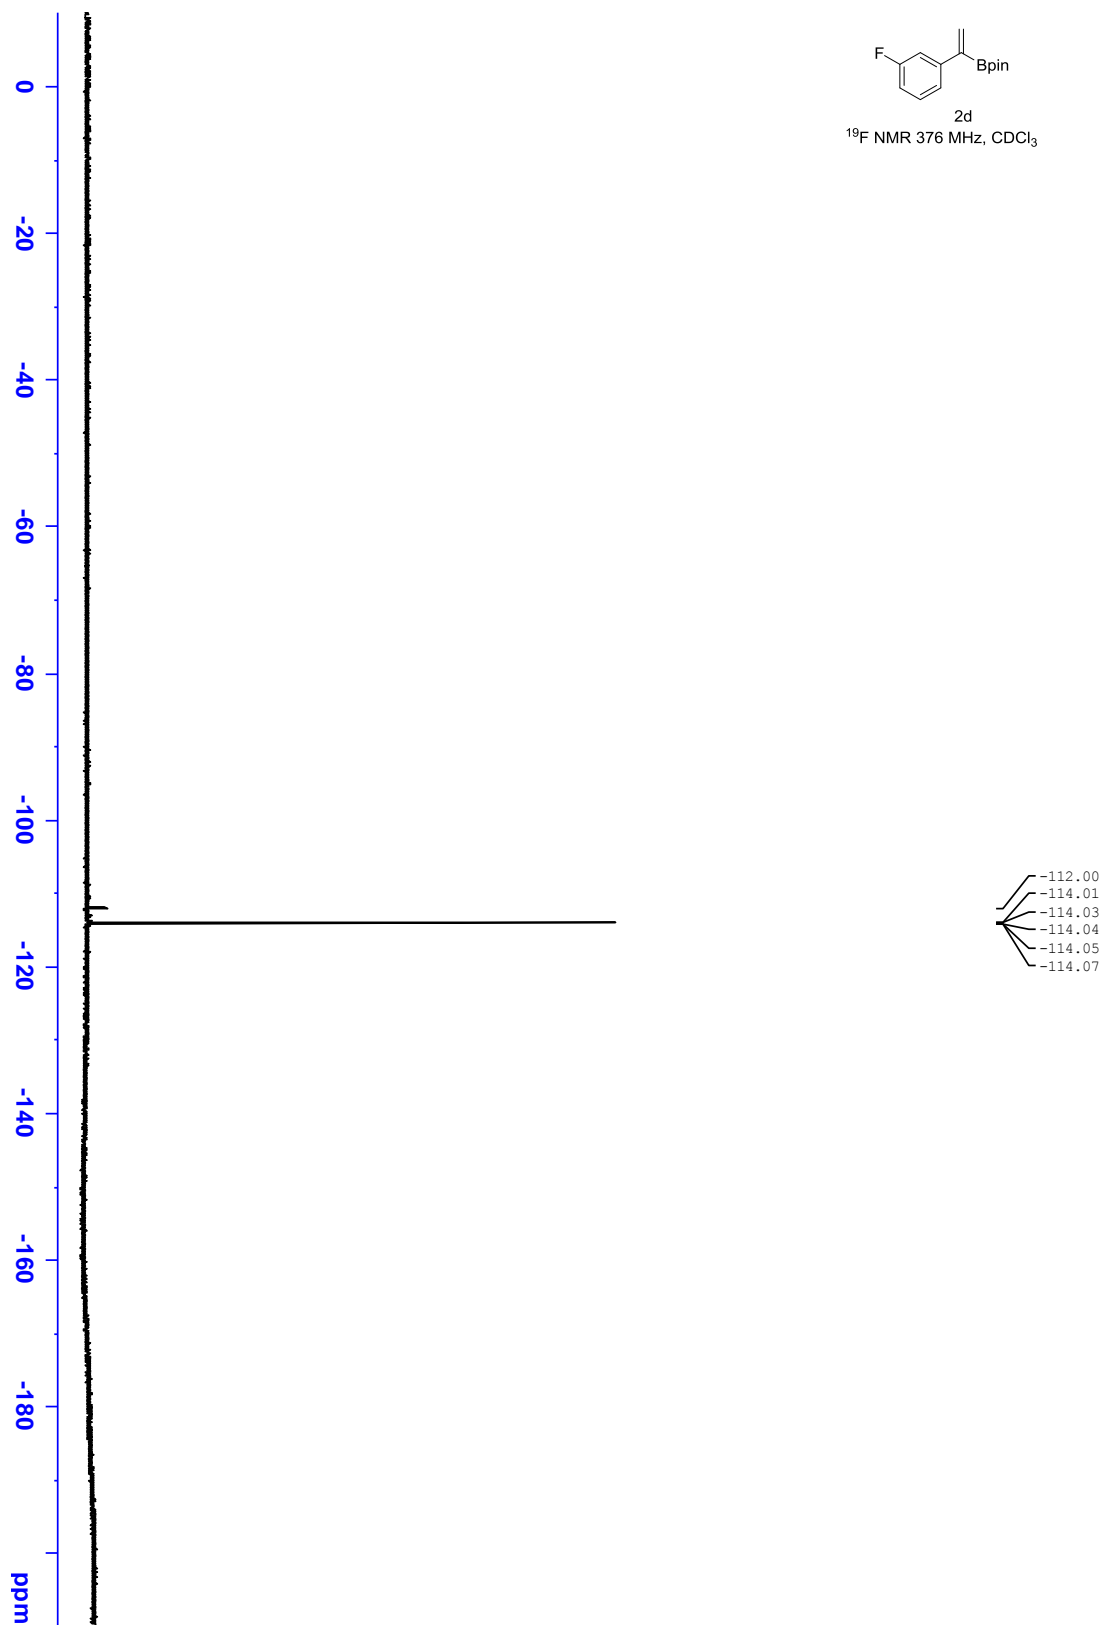

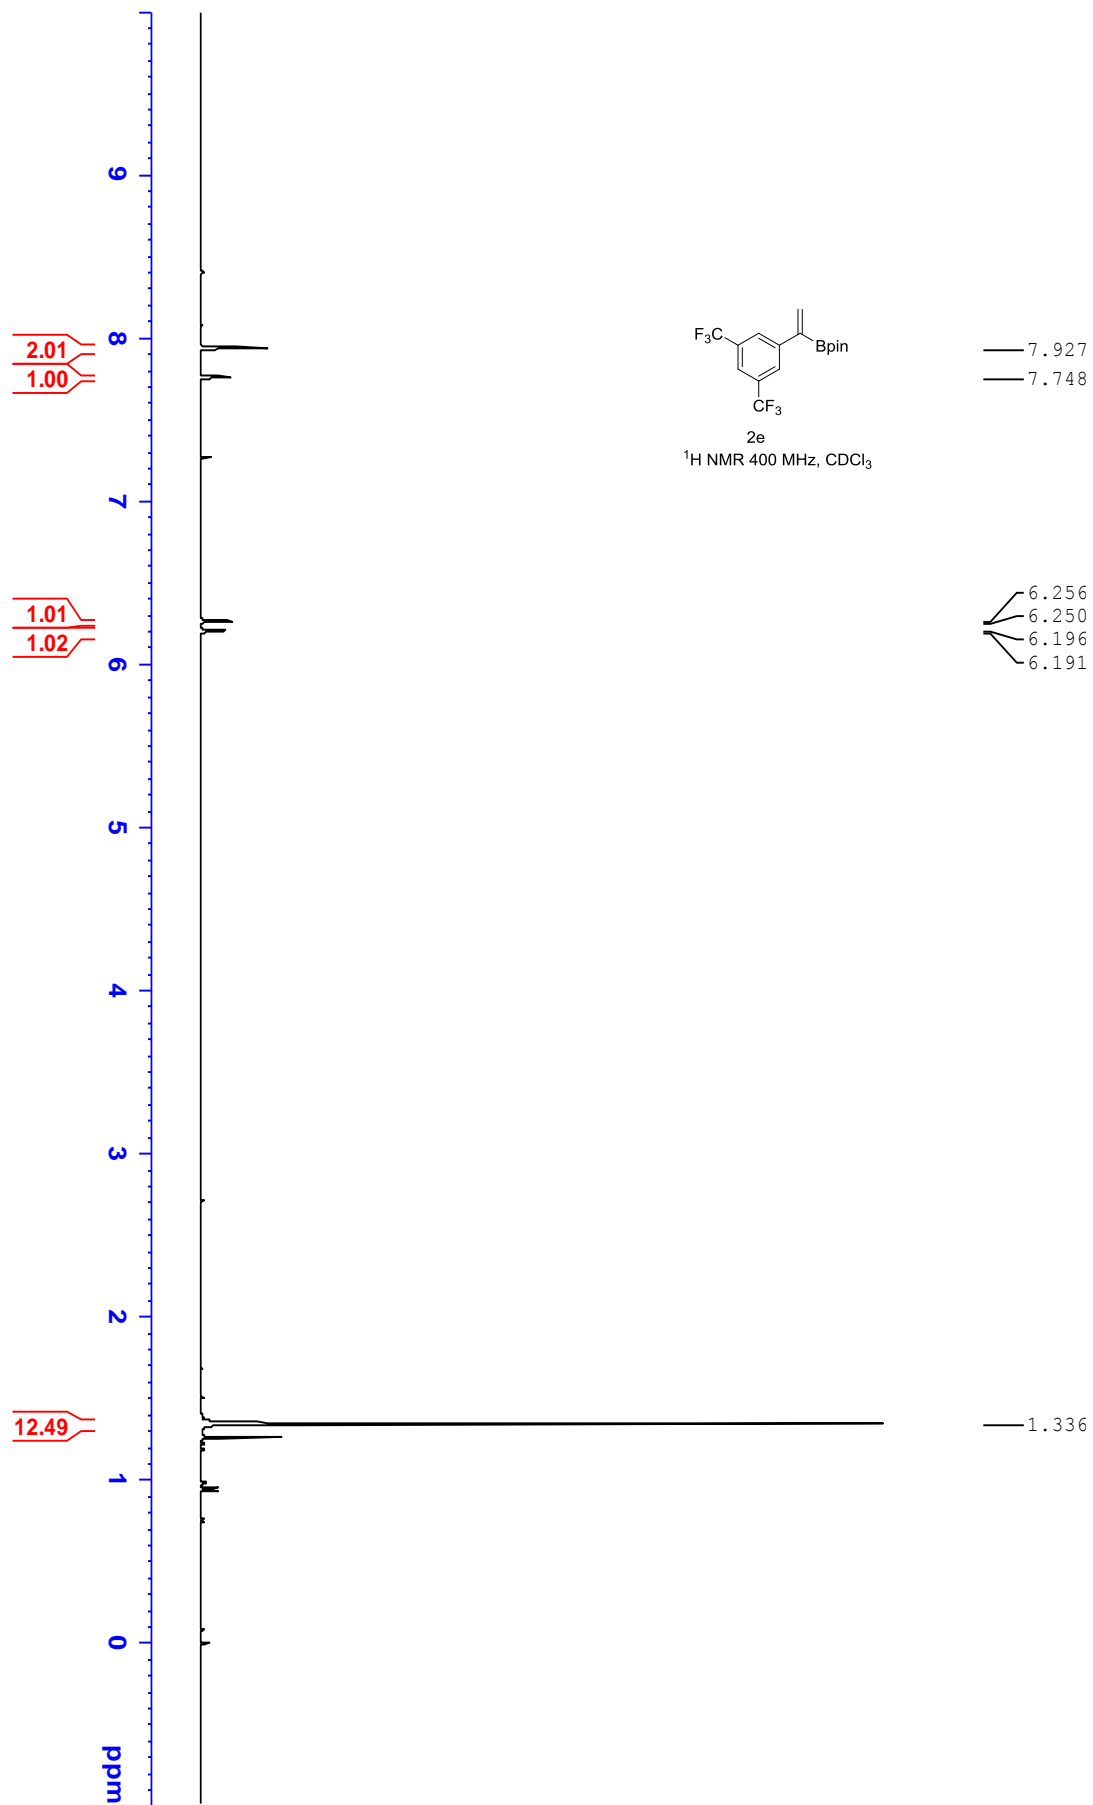

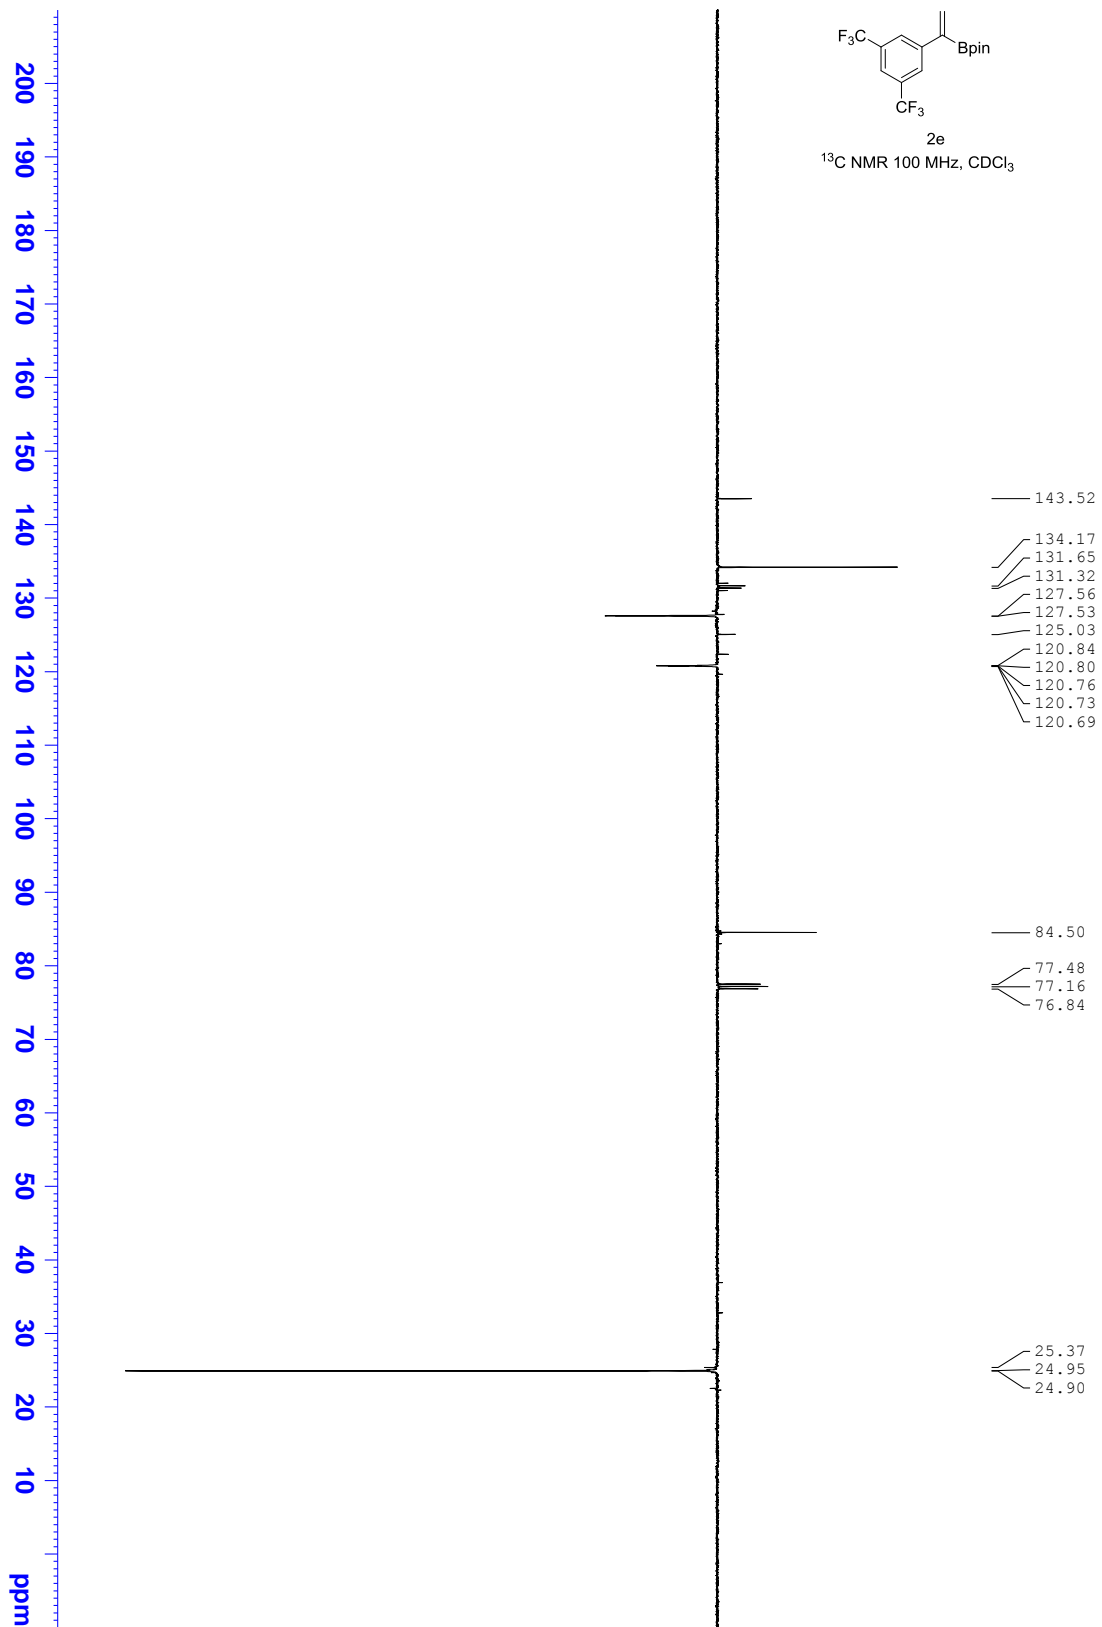

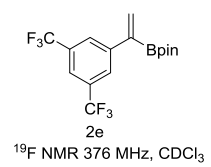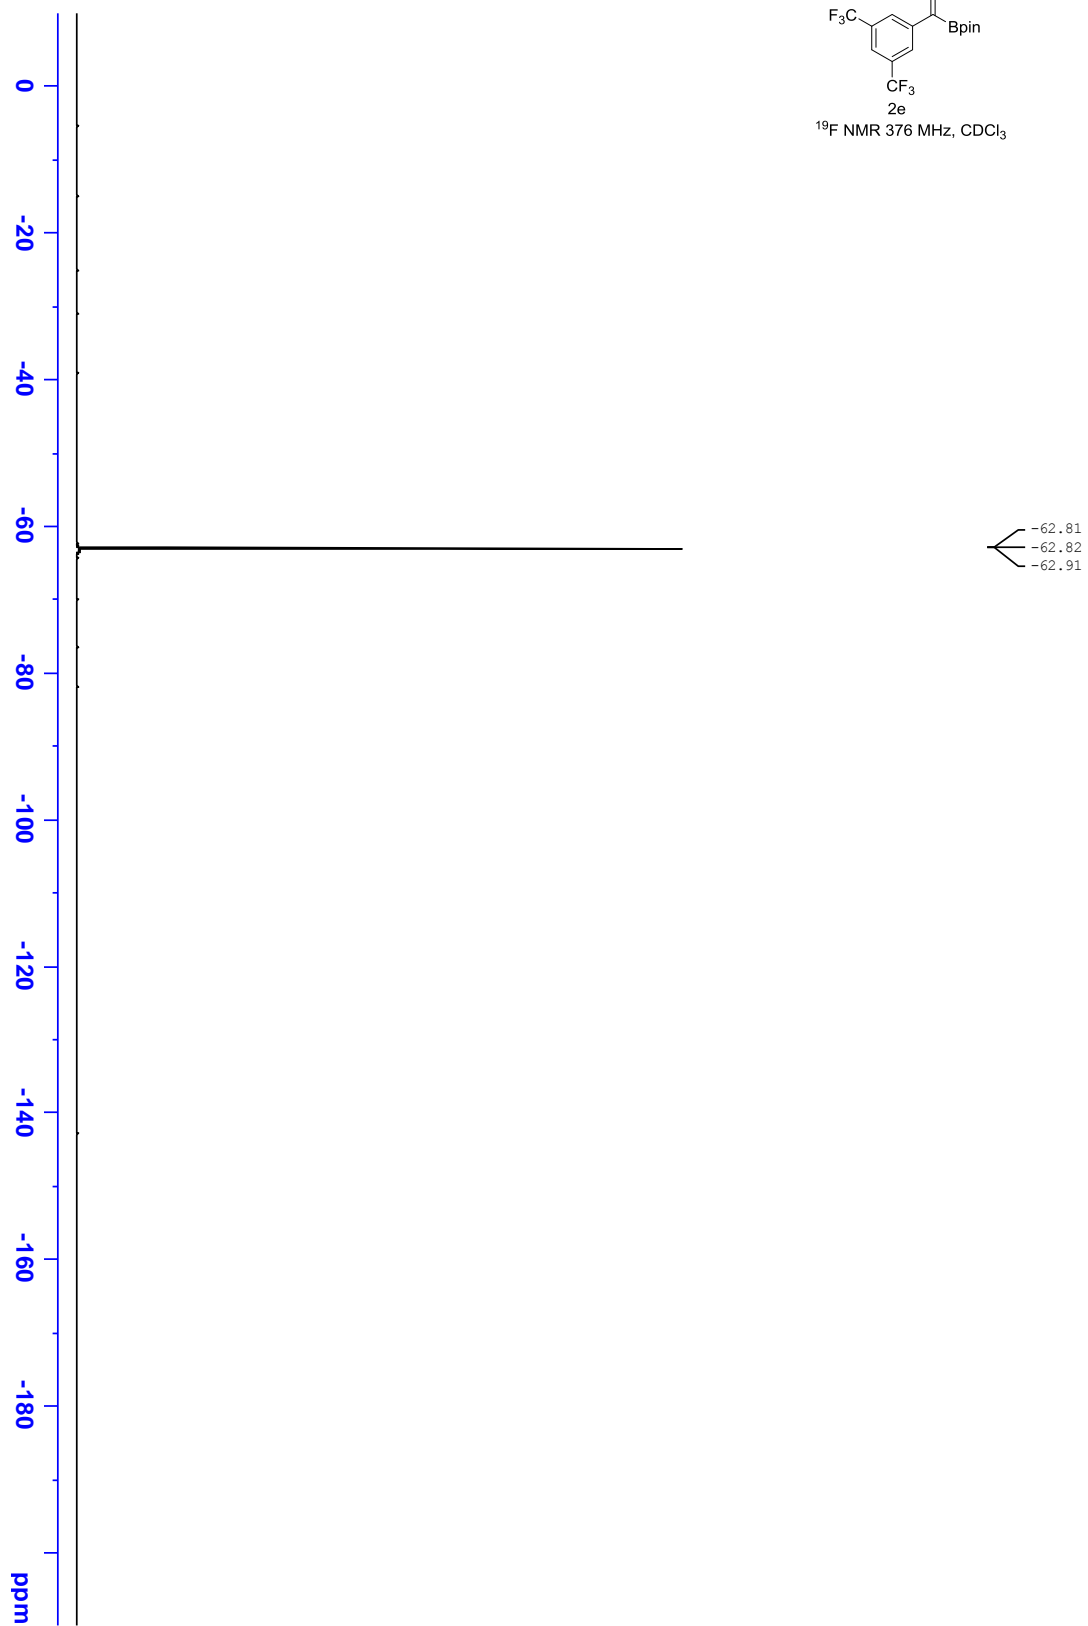

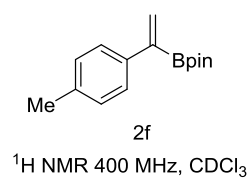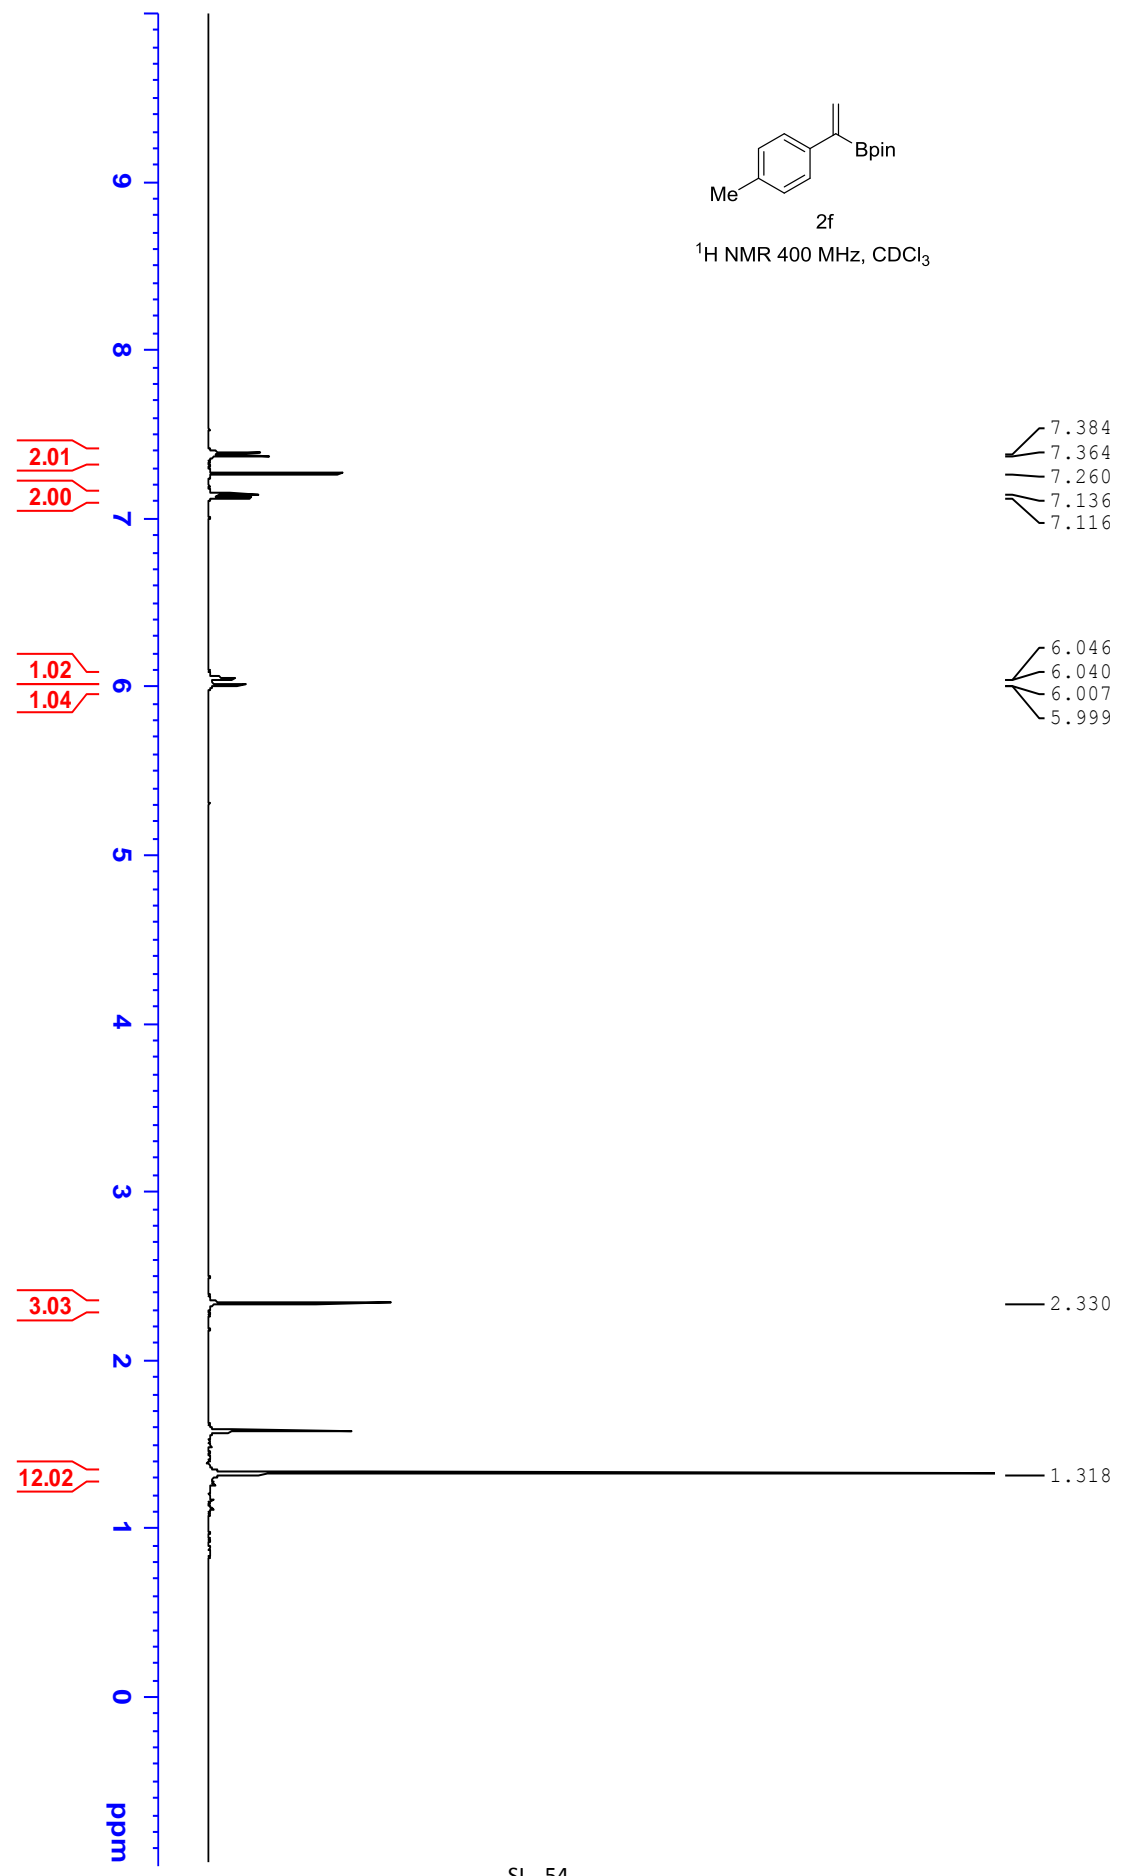

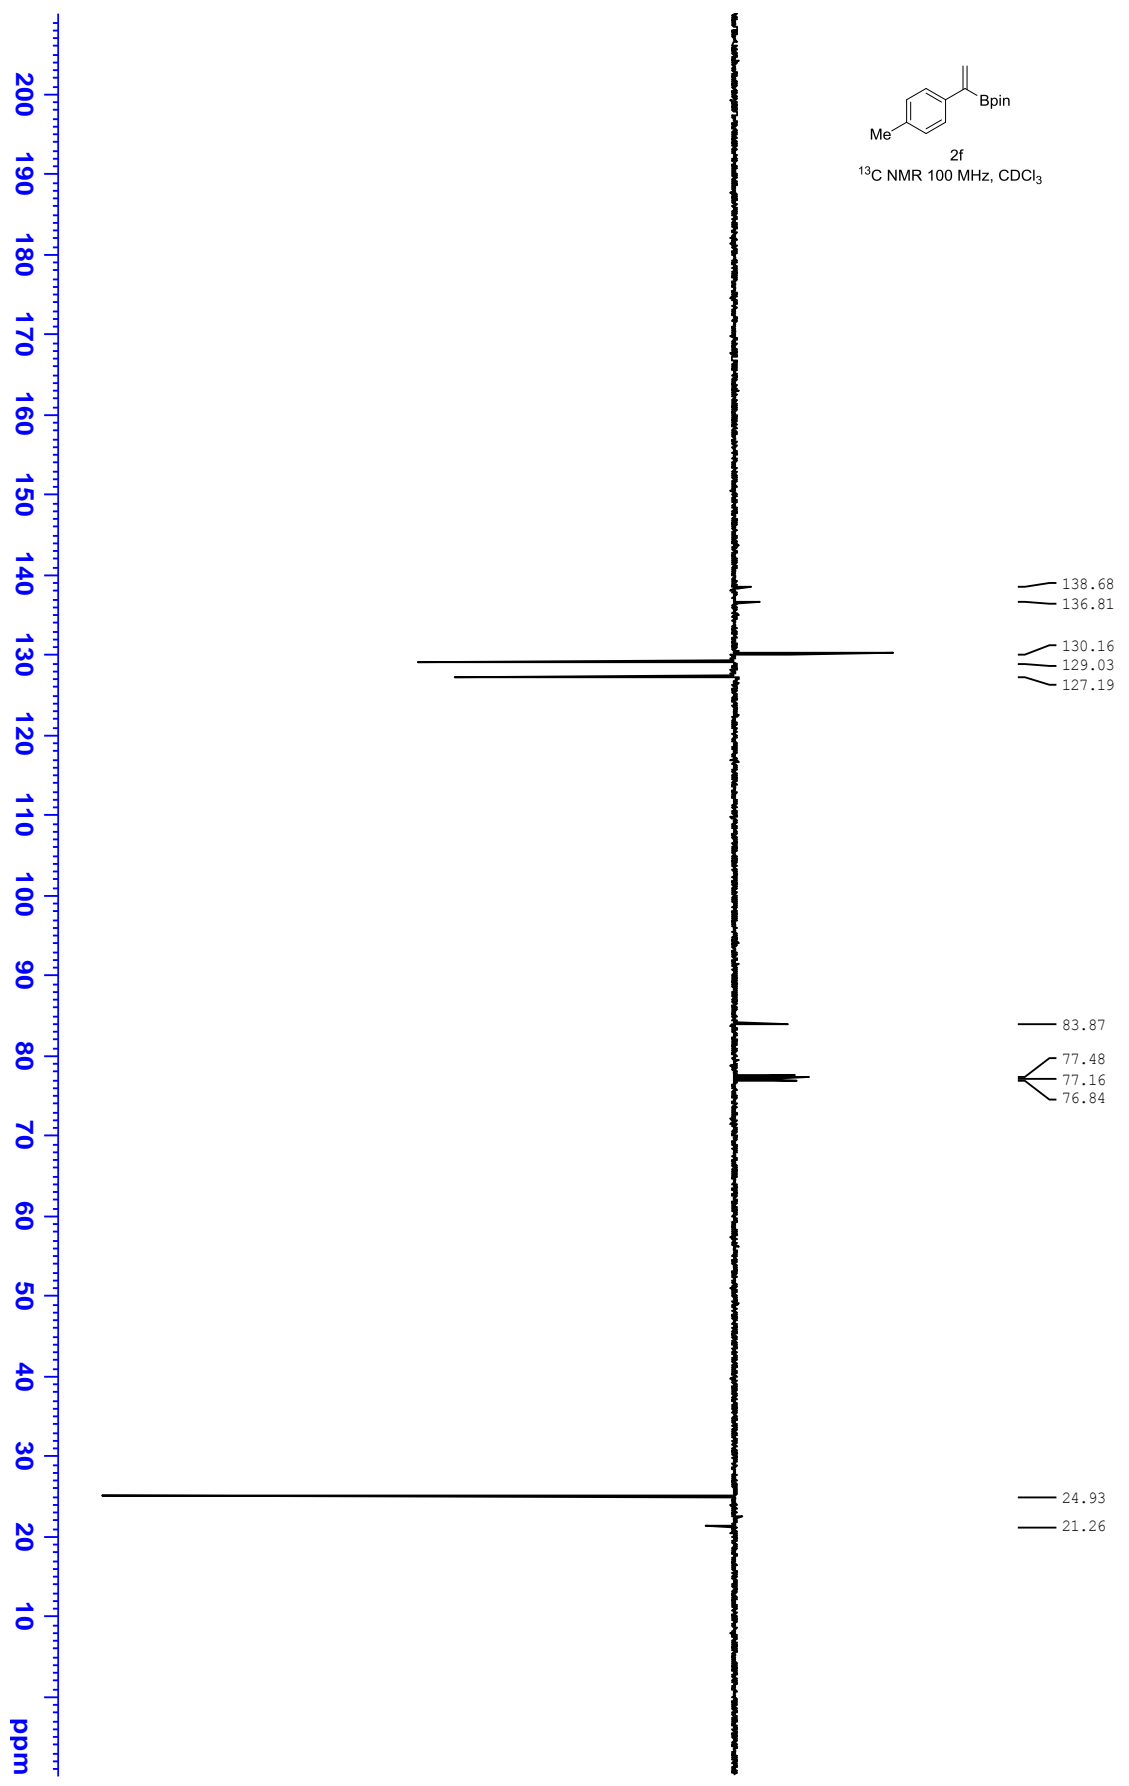

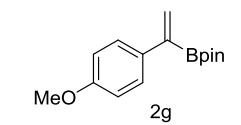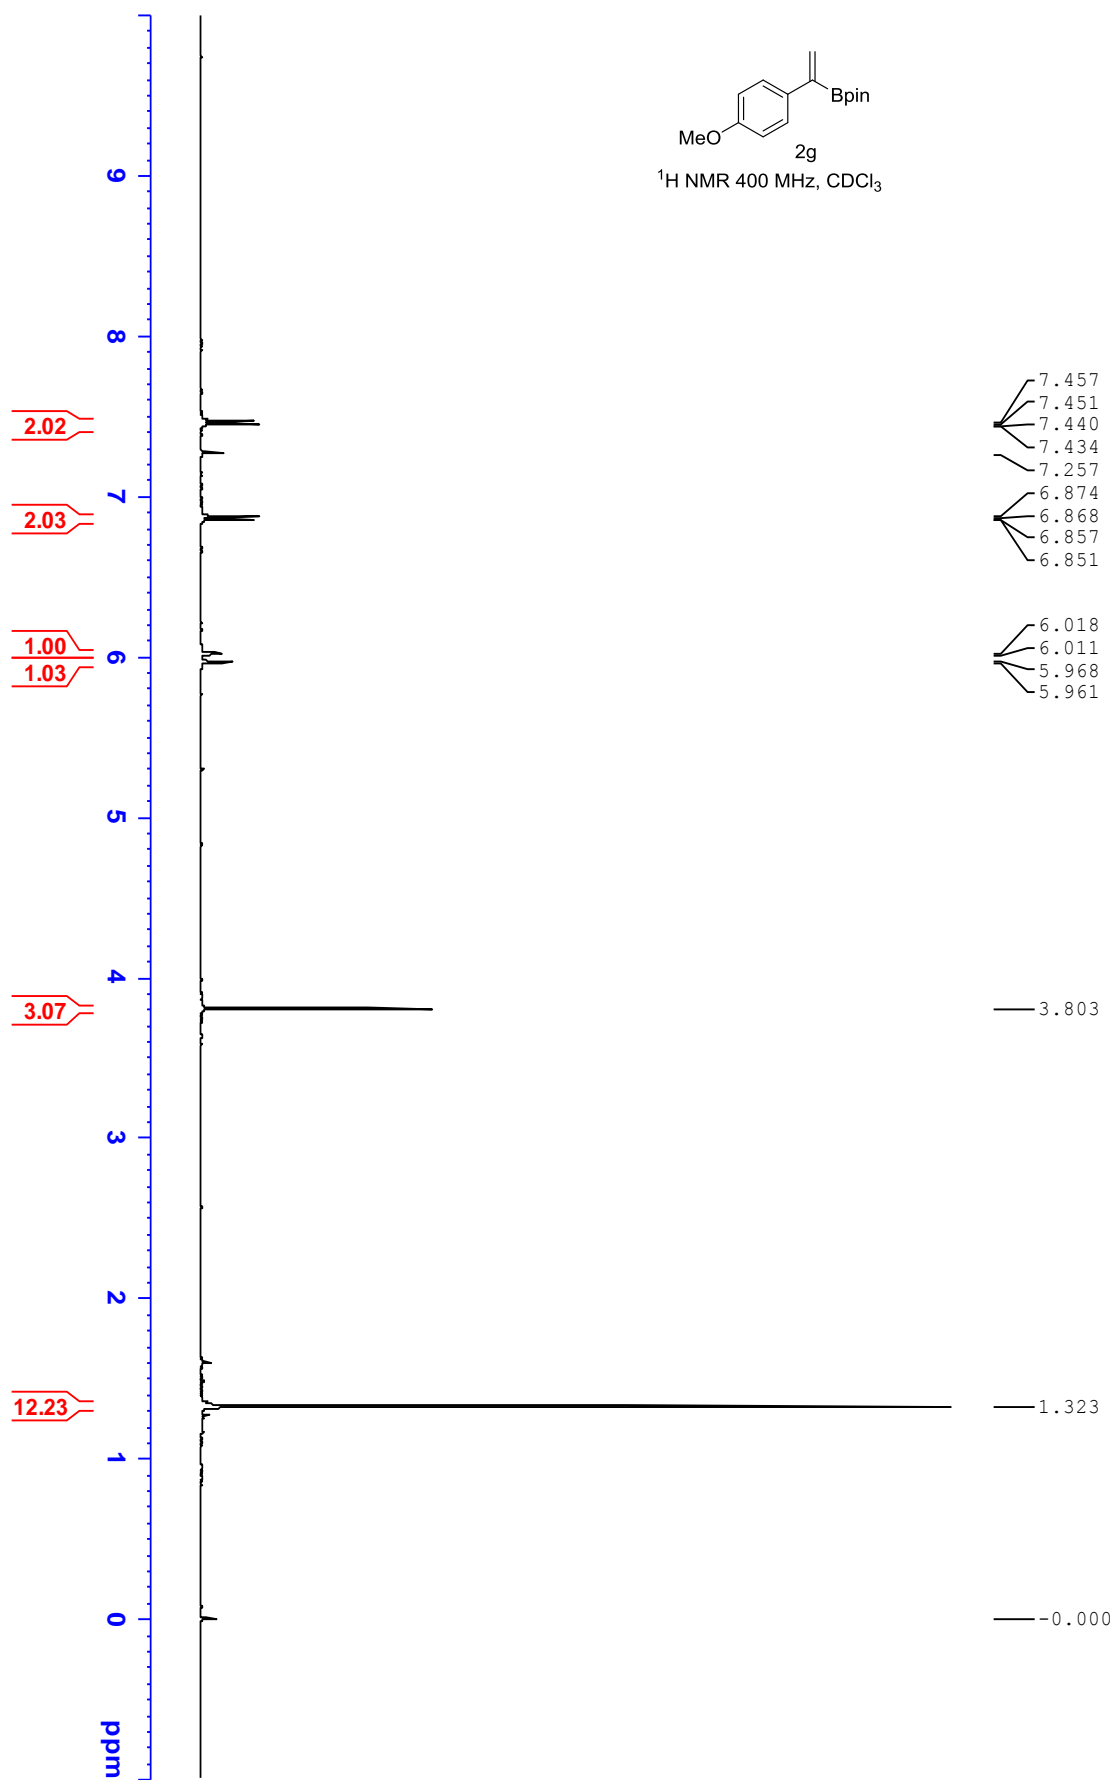



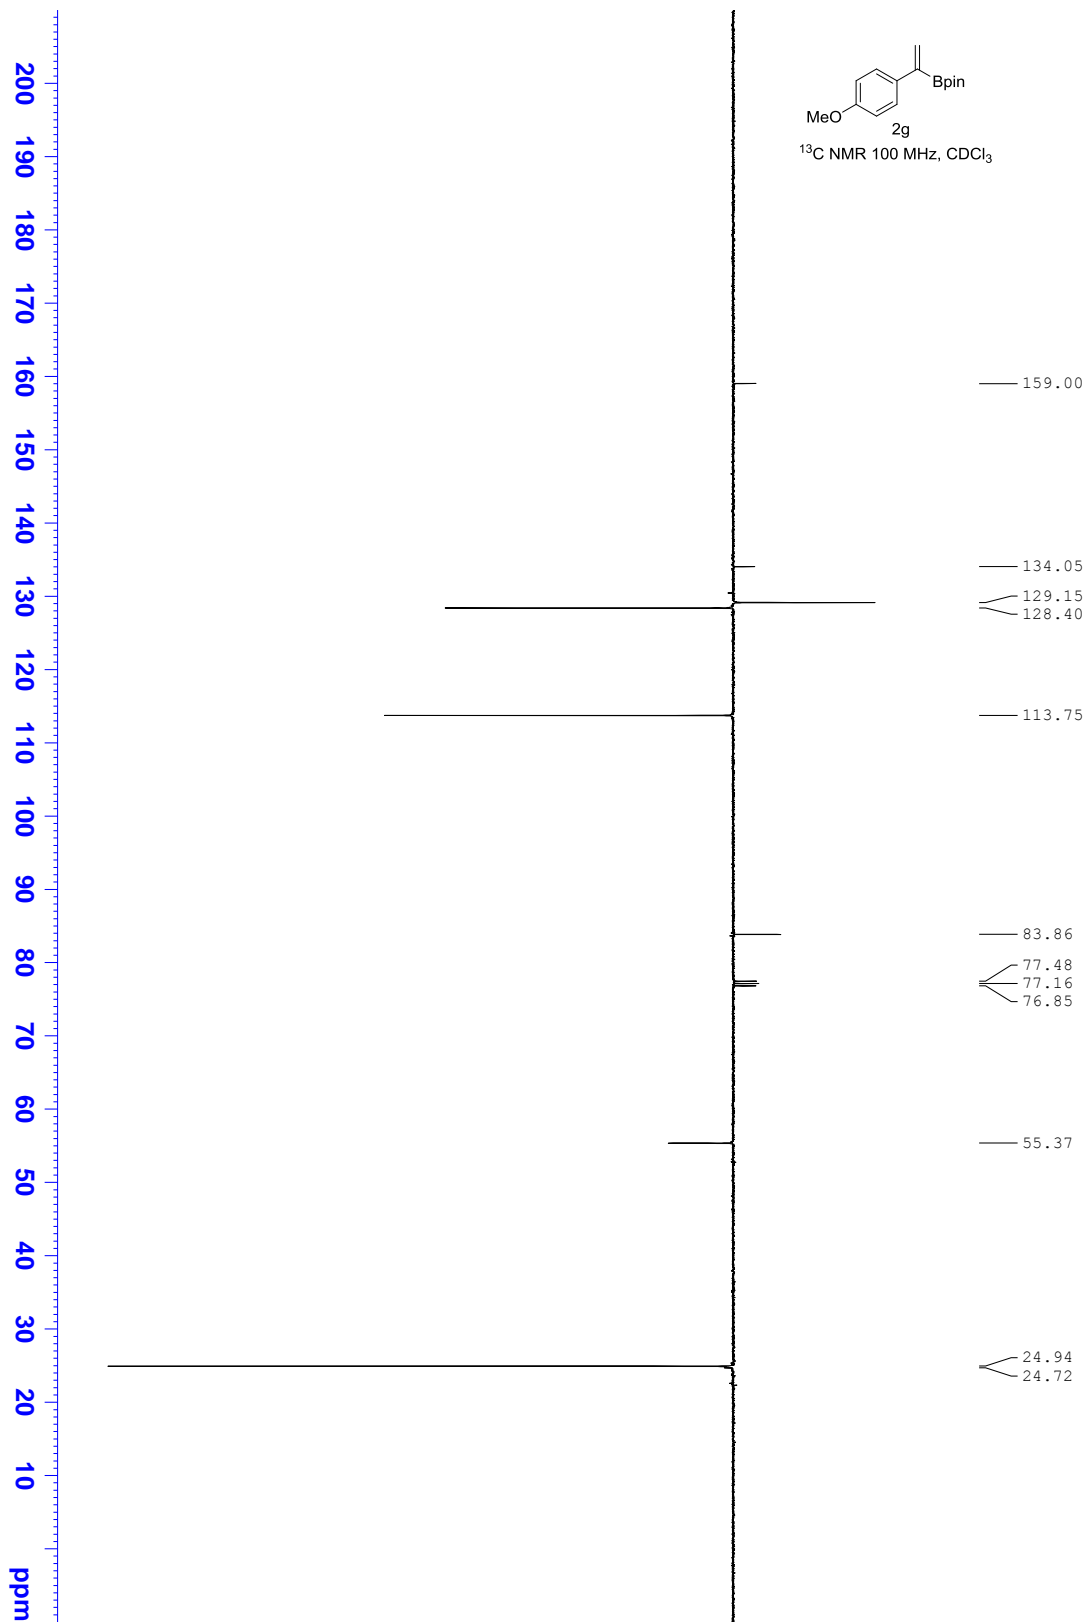

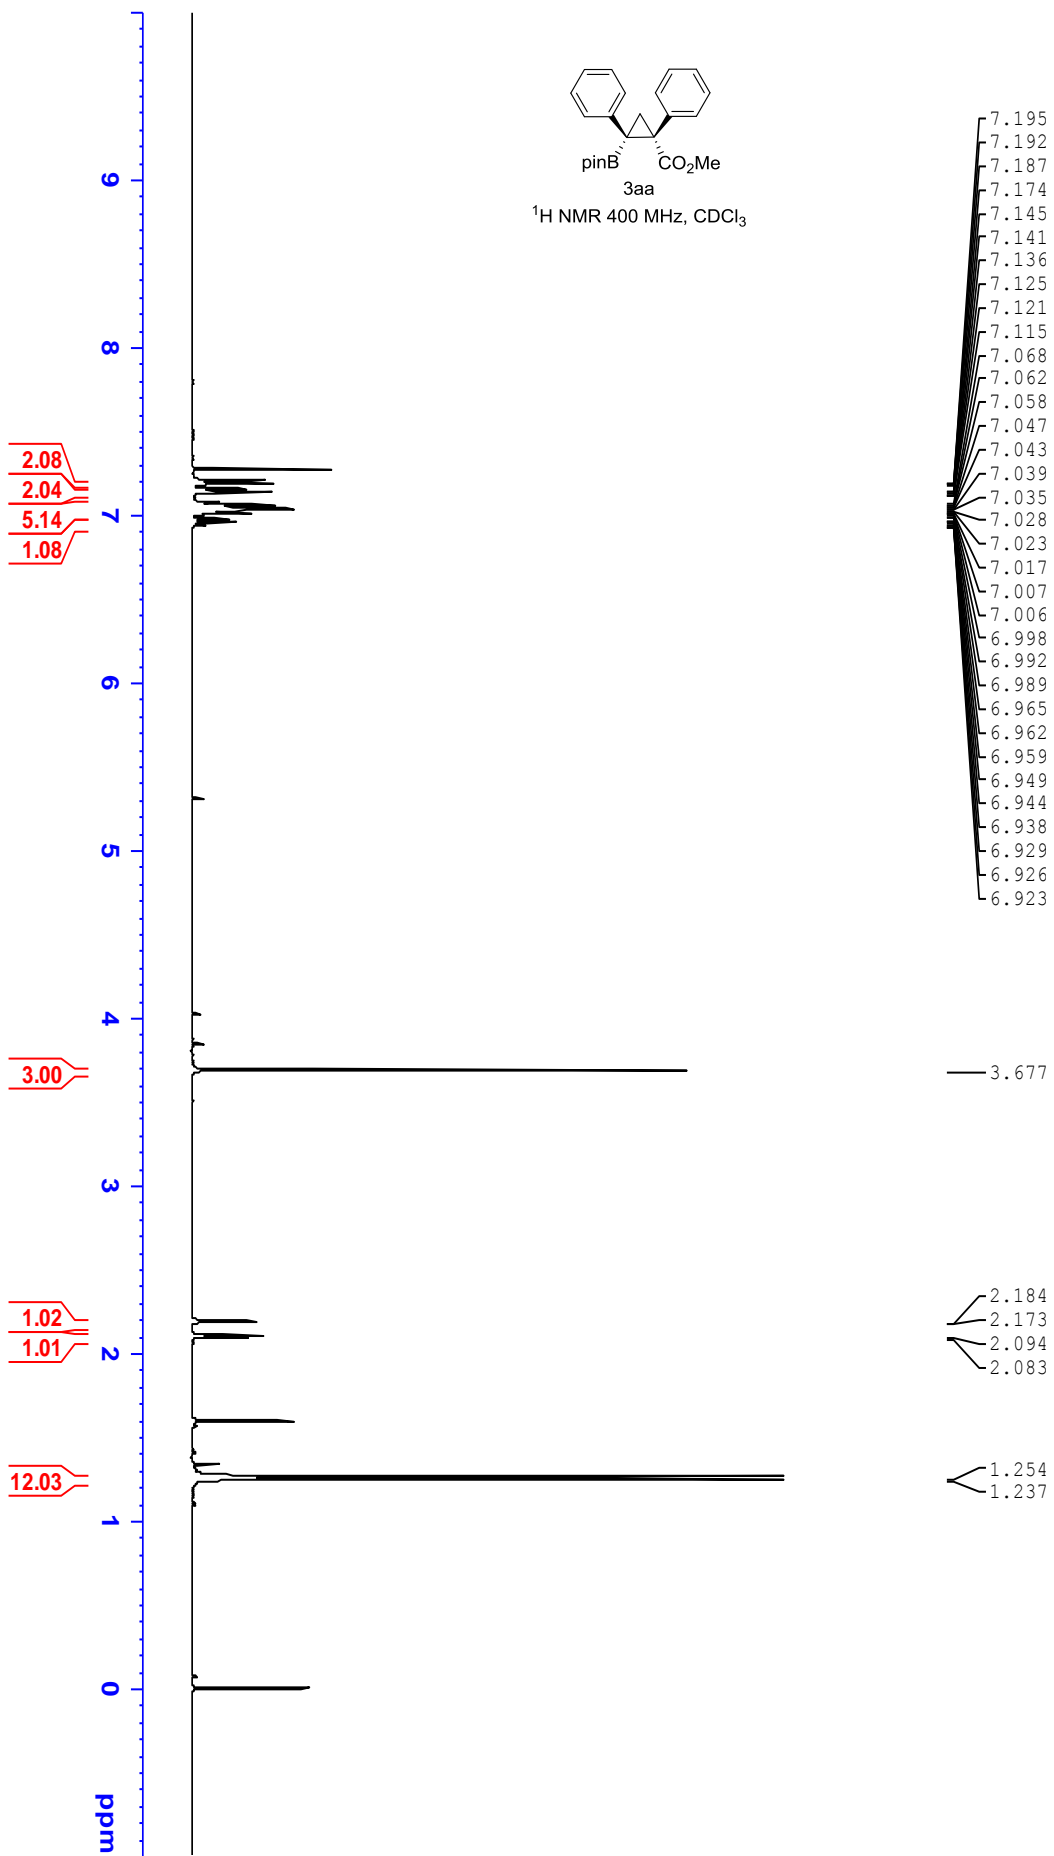

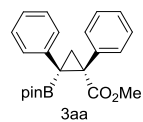

$^{13}\text{C}$  NMR 100 MHz,  $\text{CDCl}_3$

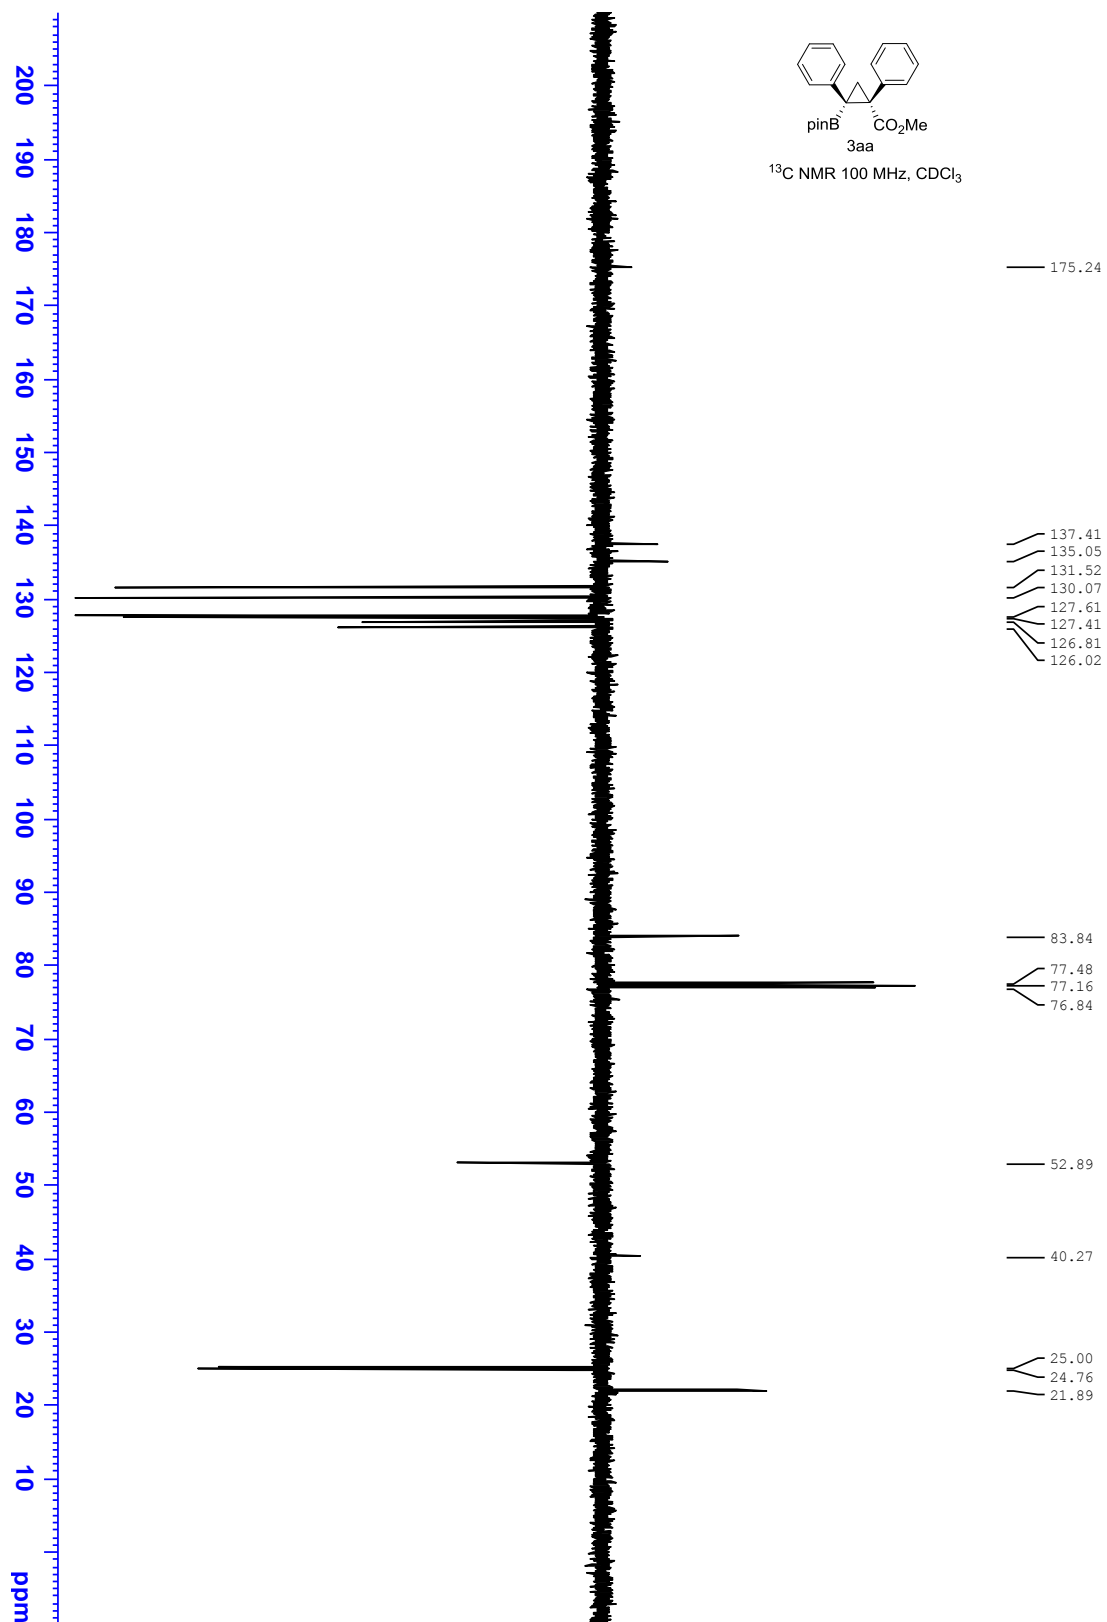

**3aa**  $^{11}\text{B}$  NMR (128 MHz,  $\text{CDCl}_3$ )

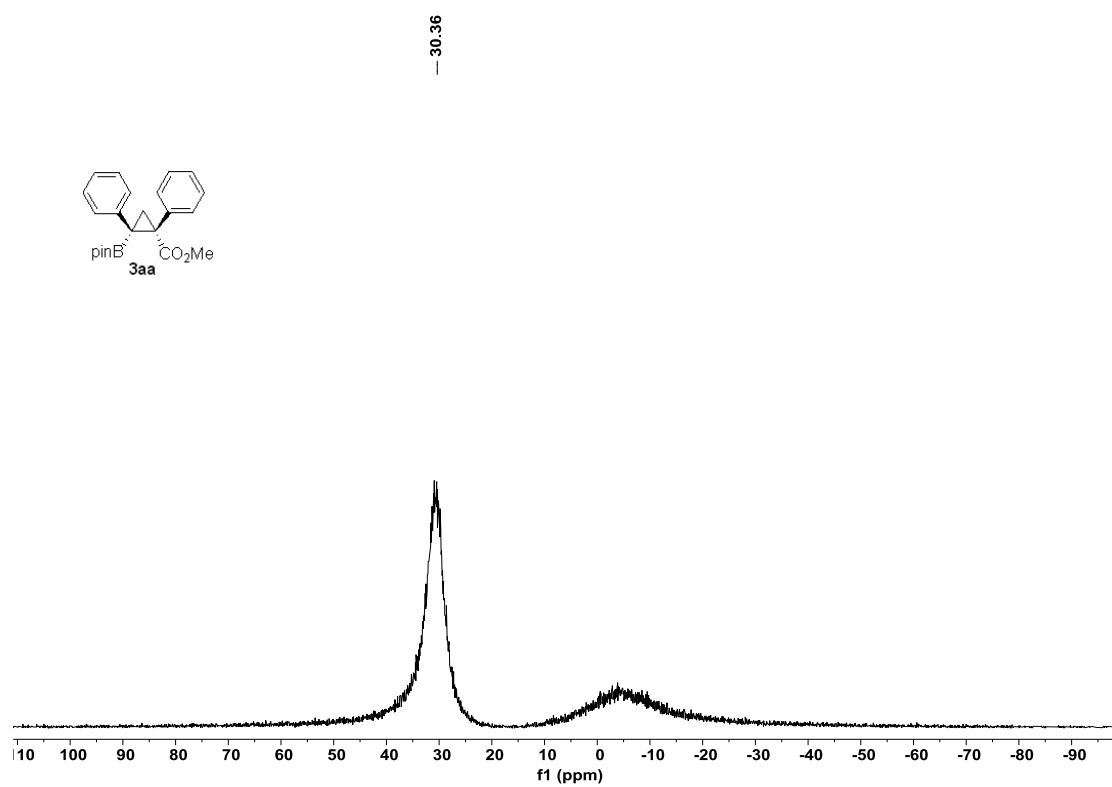

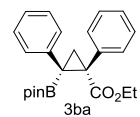

<sup>1</sup>H NMR 400 MHz, CDCl<sub>3</sub>

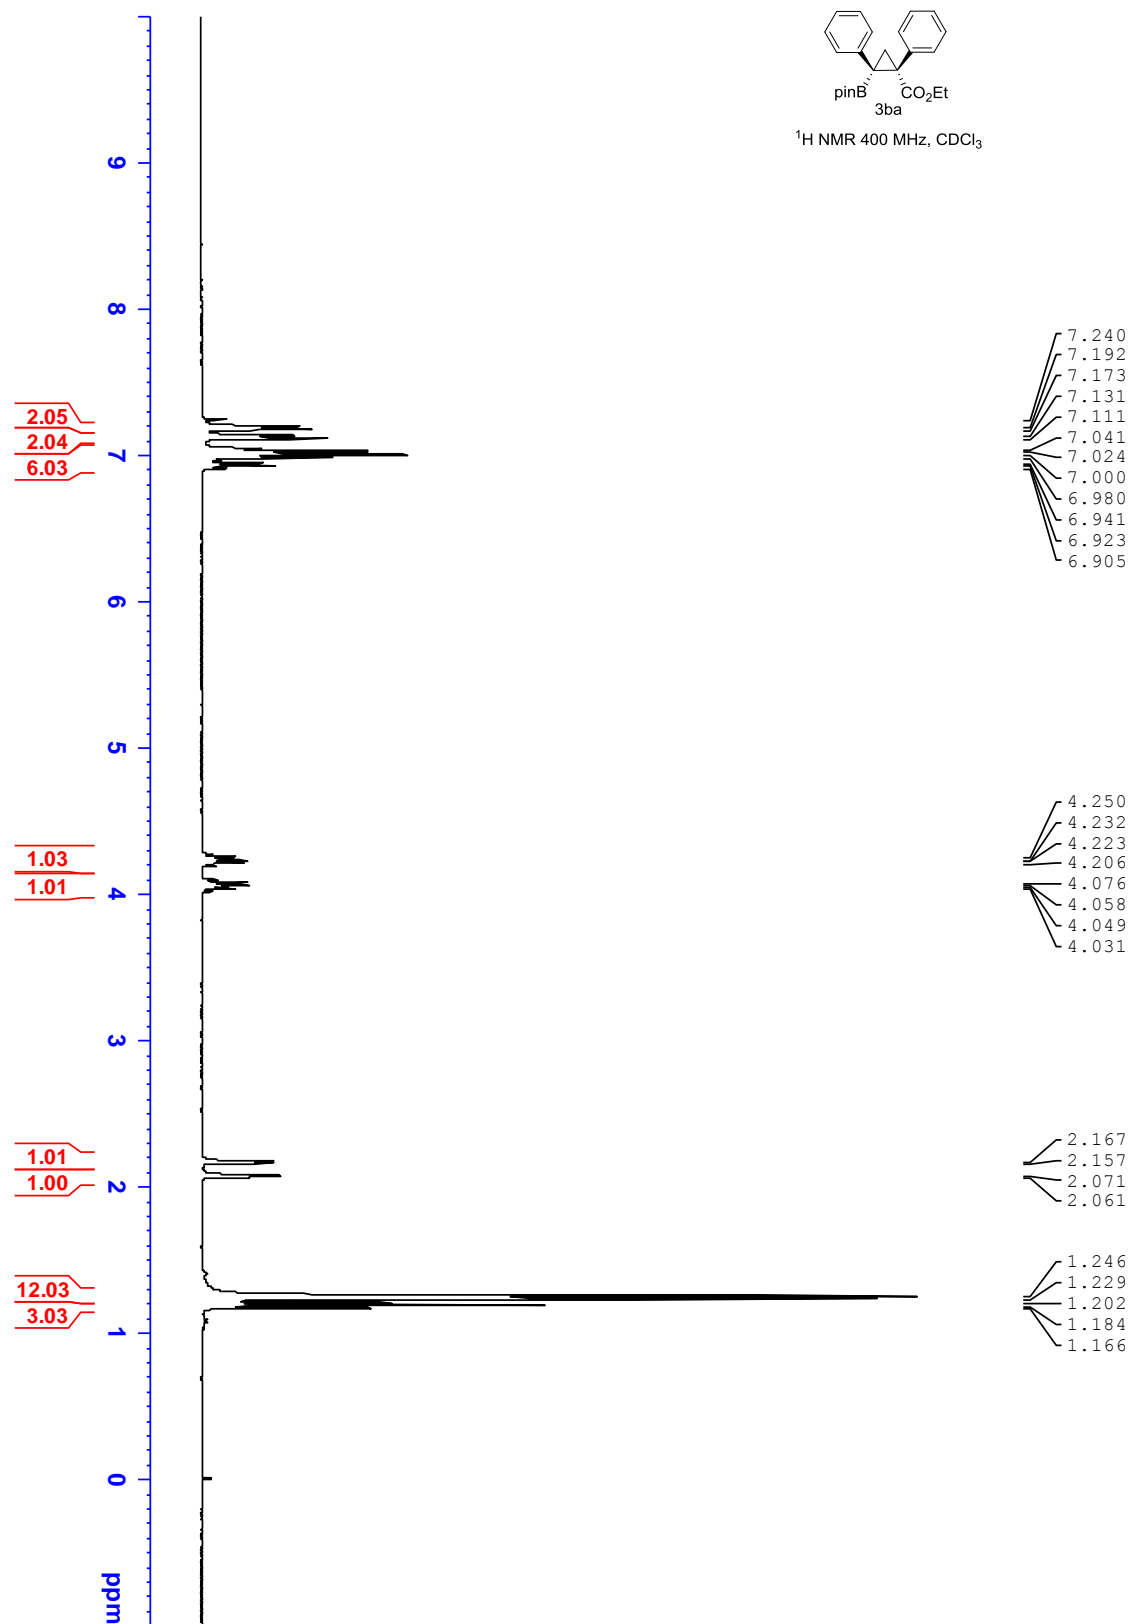

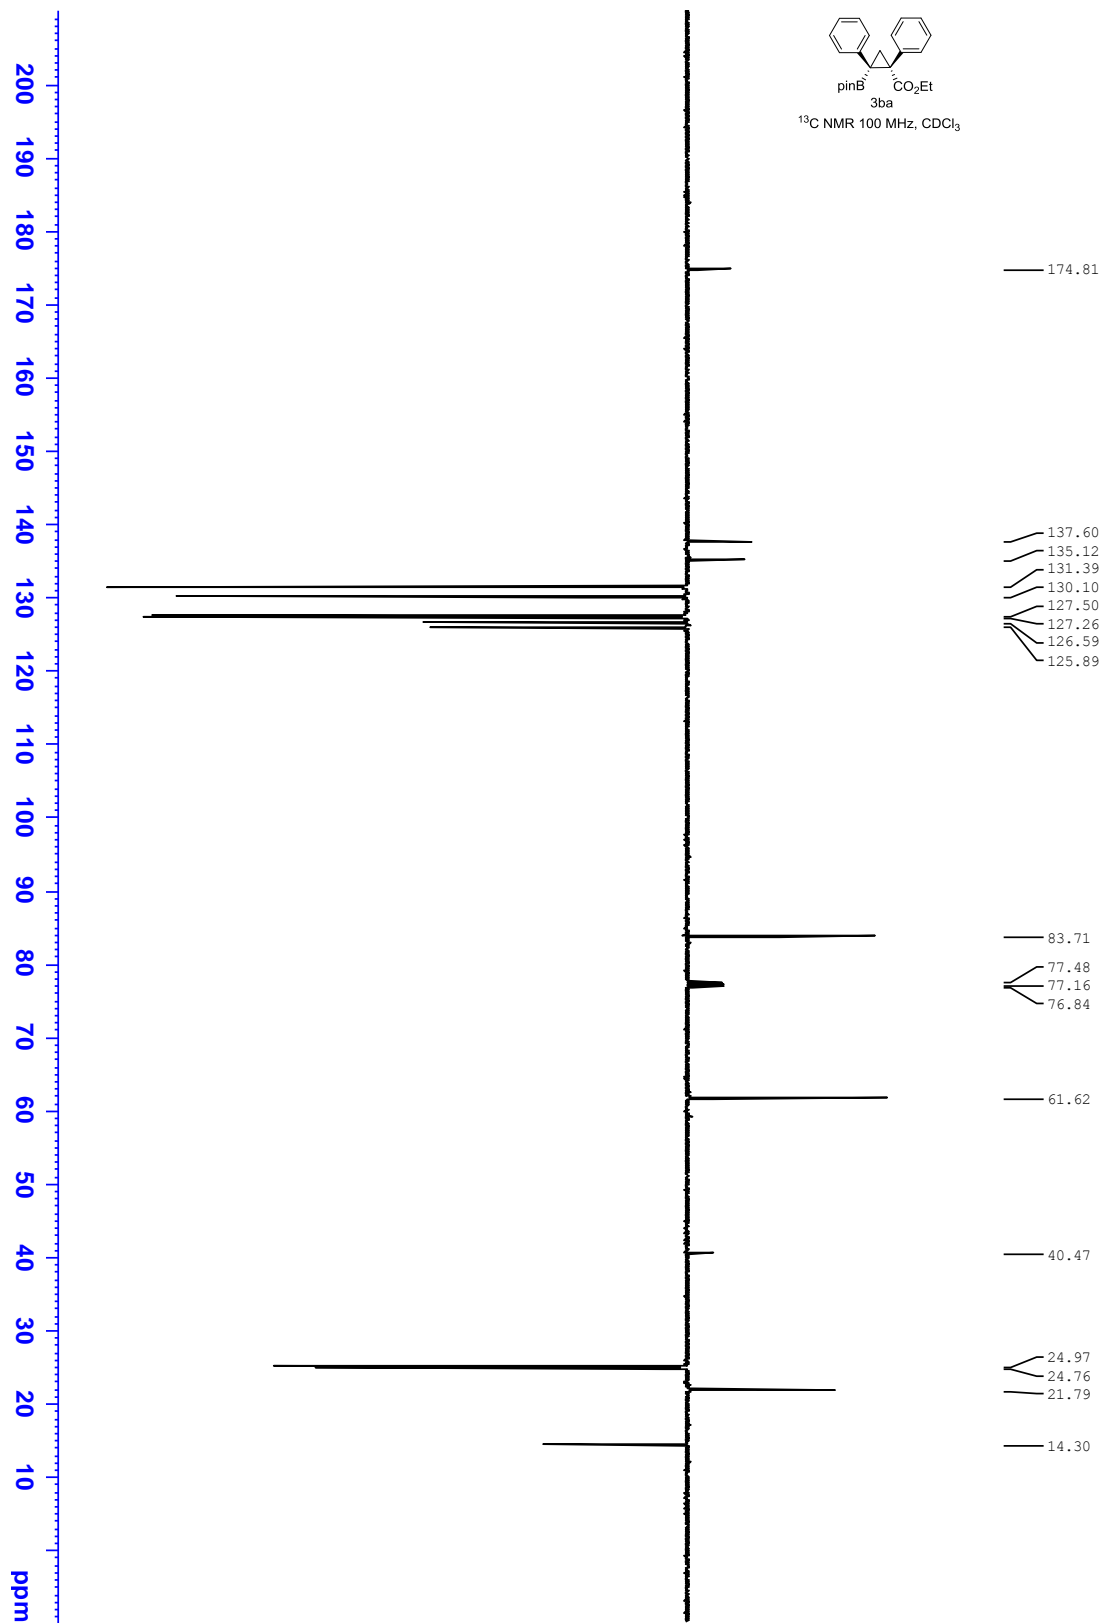

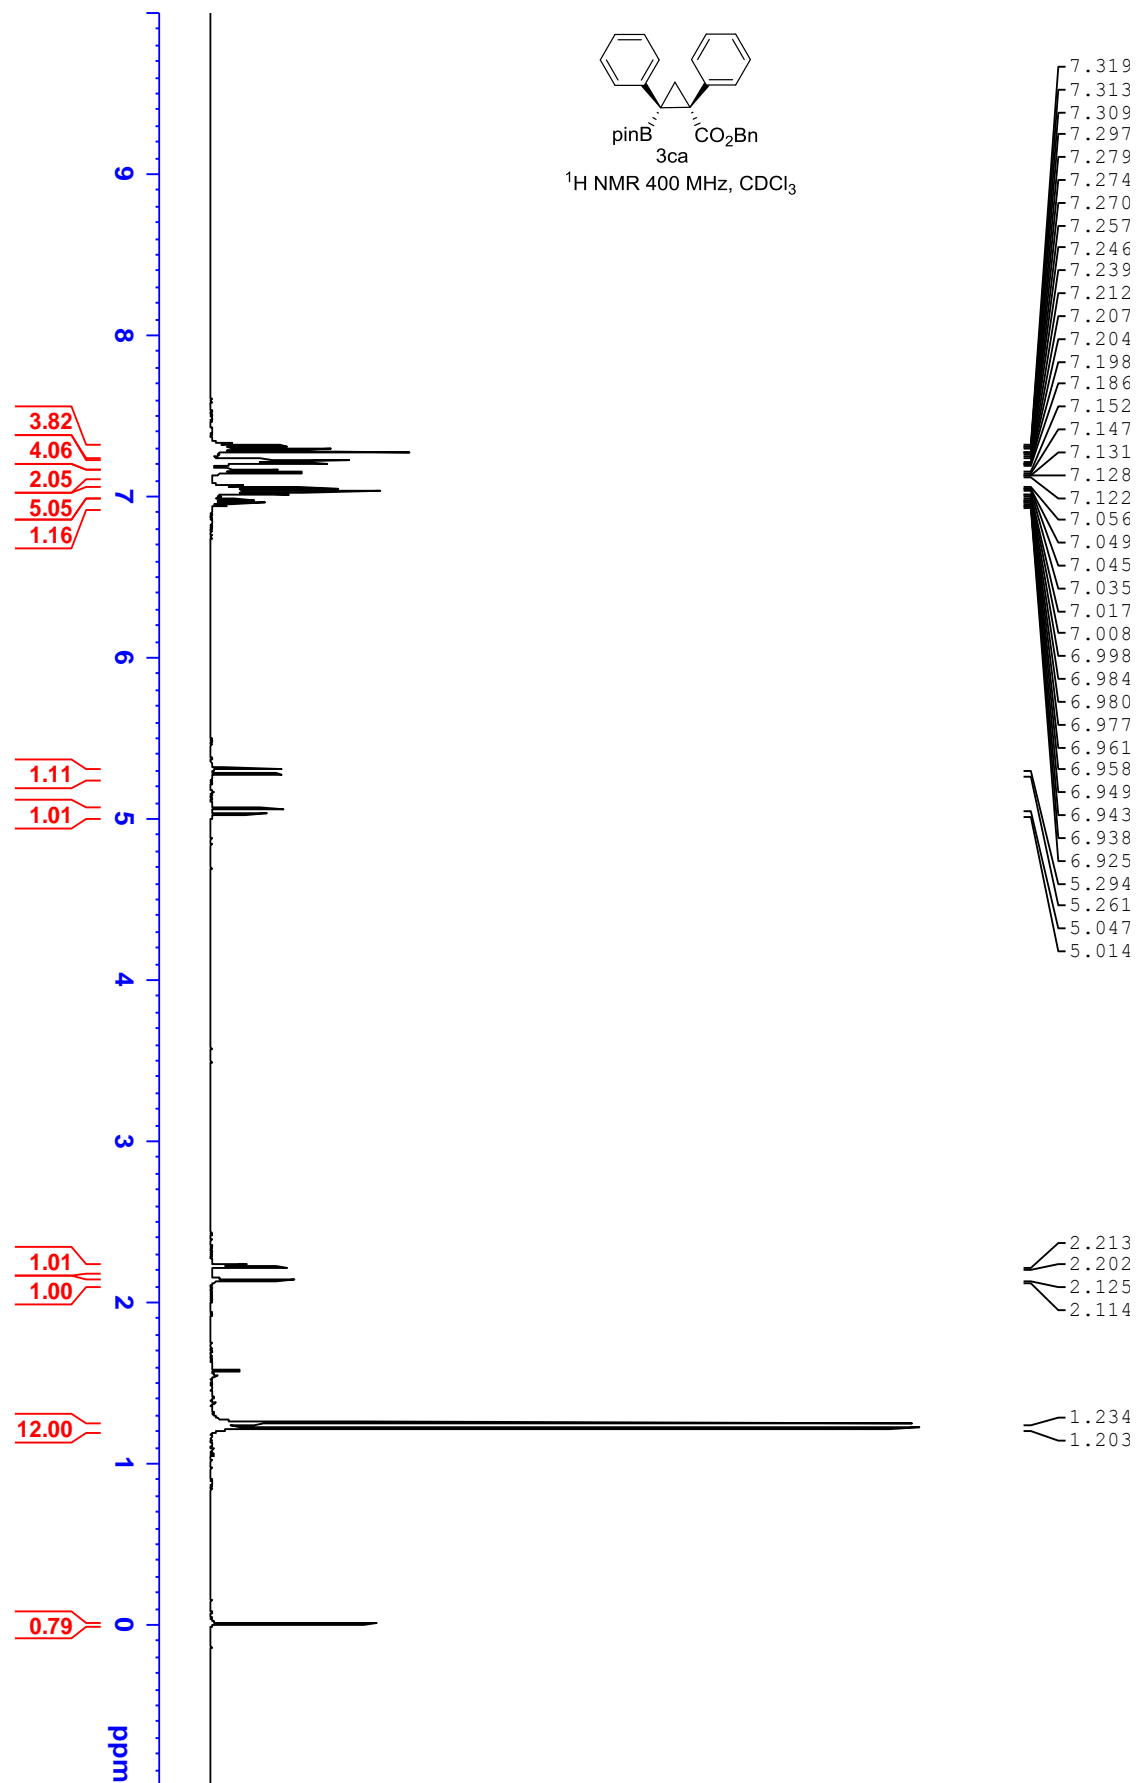

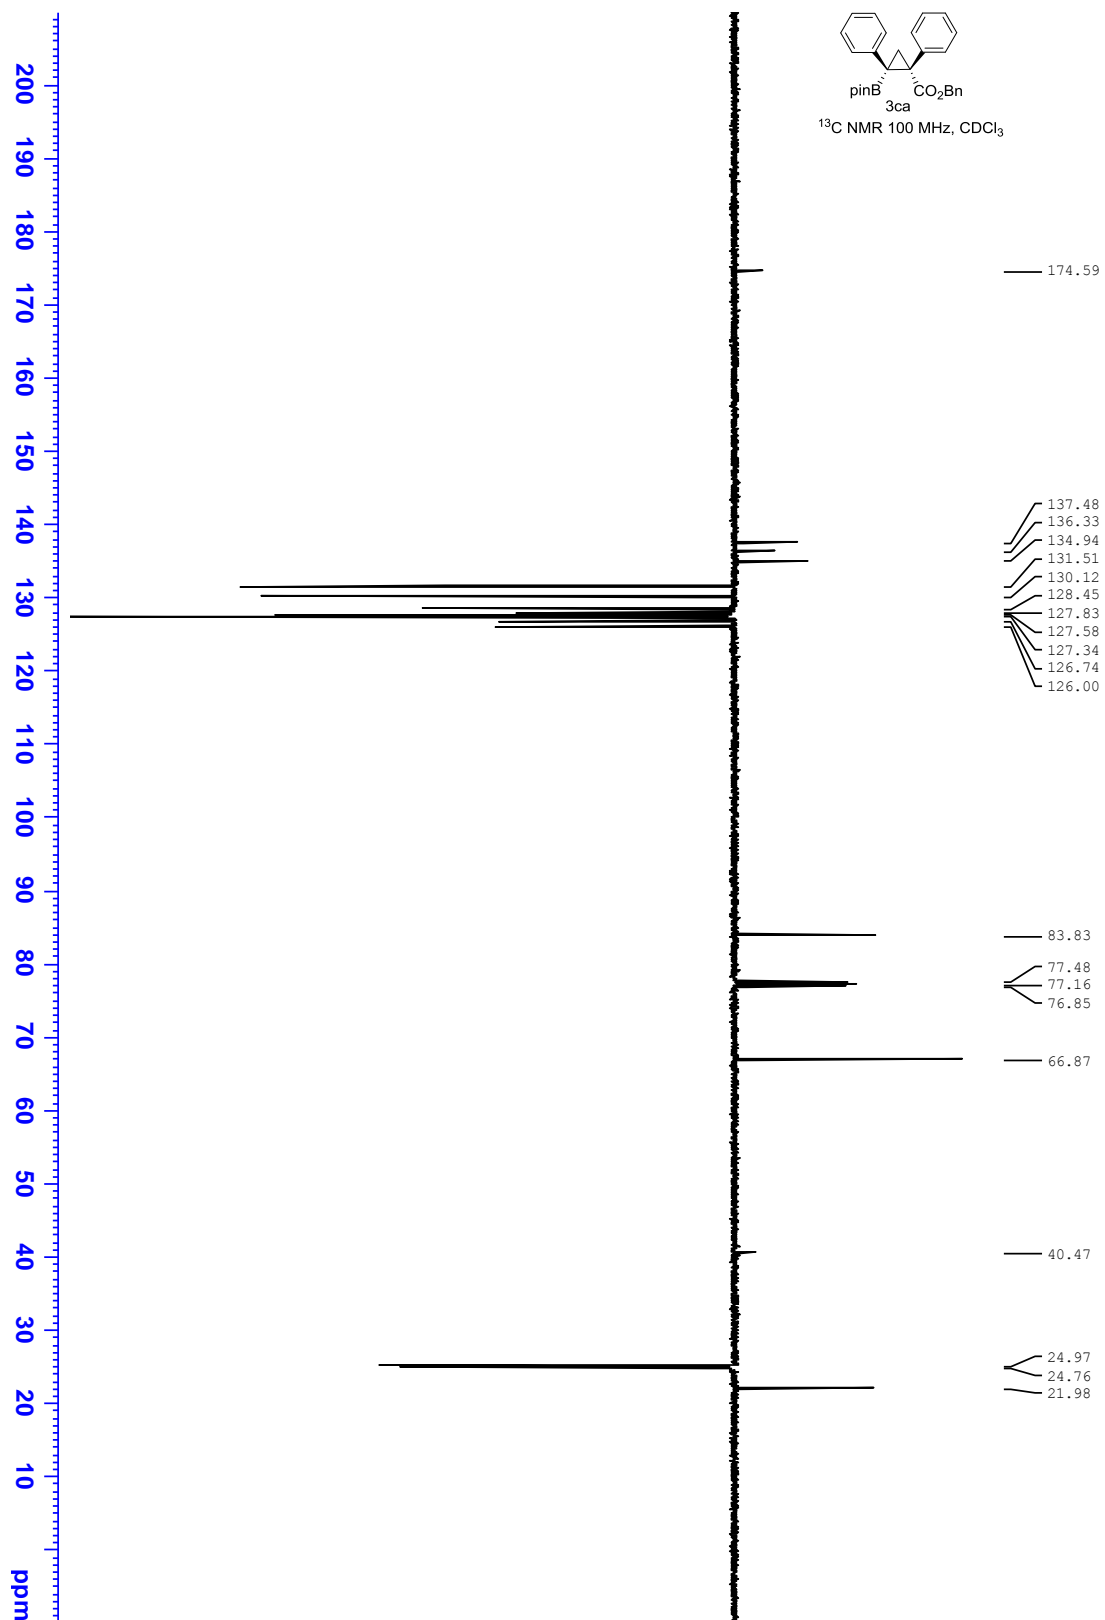



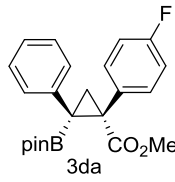

<sup>1</sup>H NMR 400 MHz, CDCl<sub>3</sub>

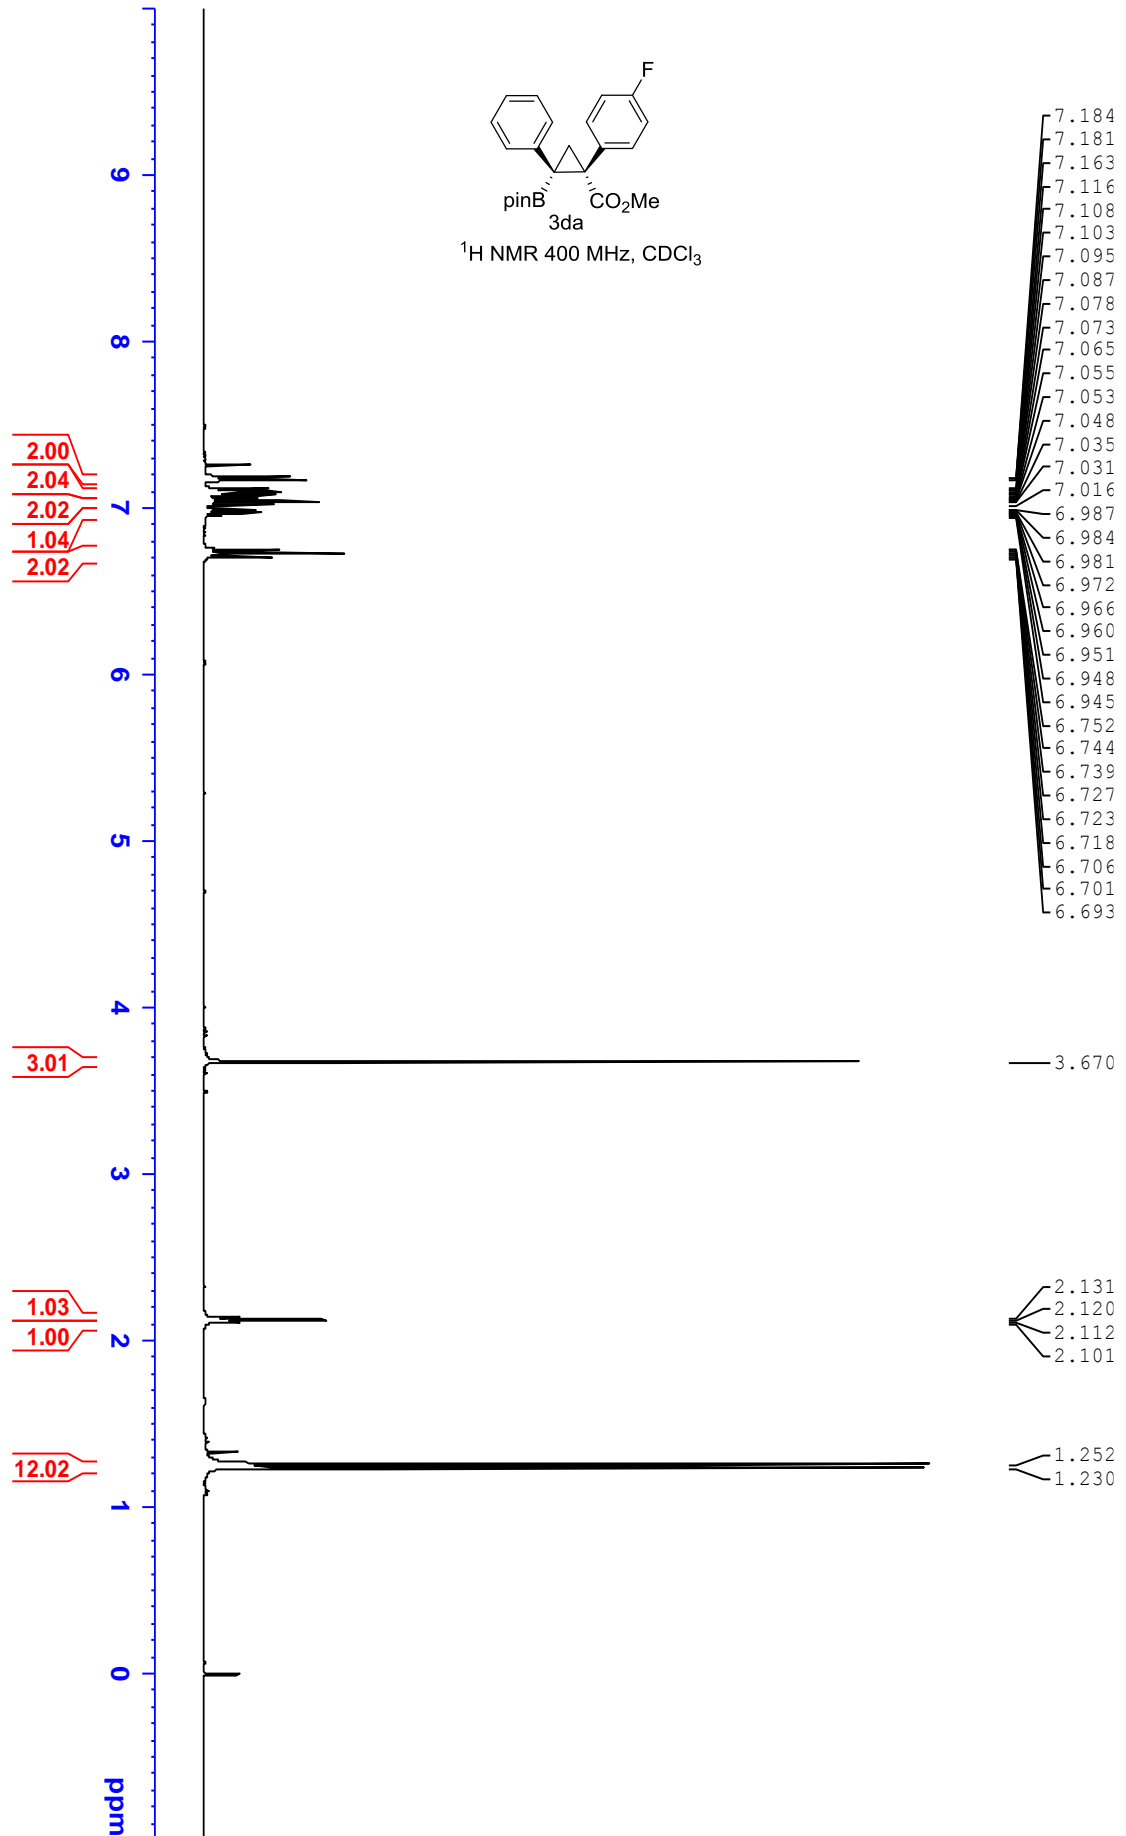

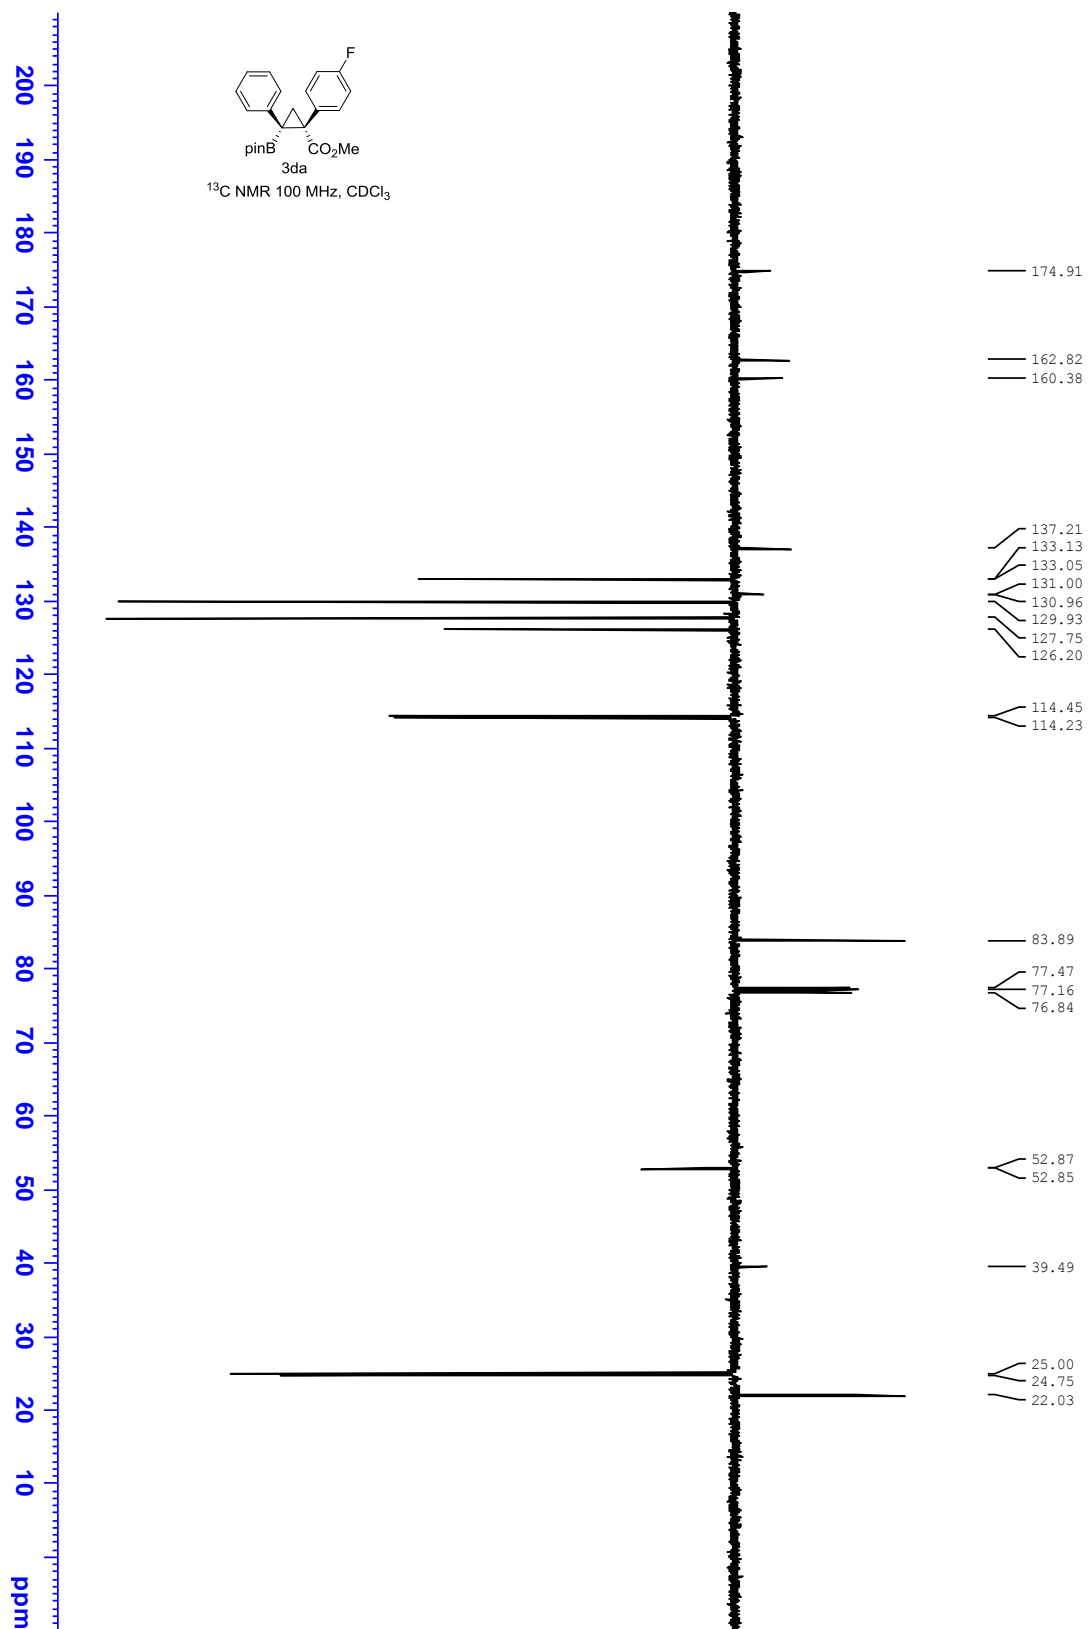

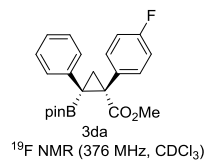

-115.572  
-115.568  
-115.567  
-115.561  
-115.661  
-115.664  
-115.662  
-115.666

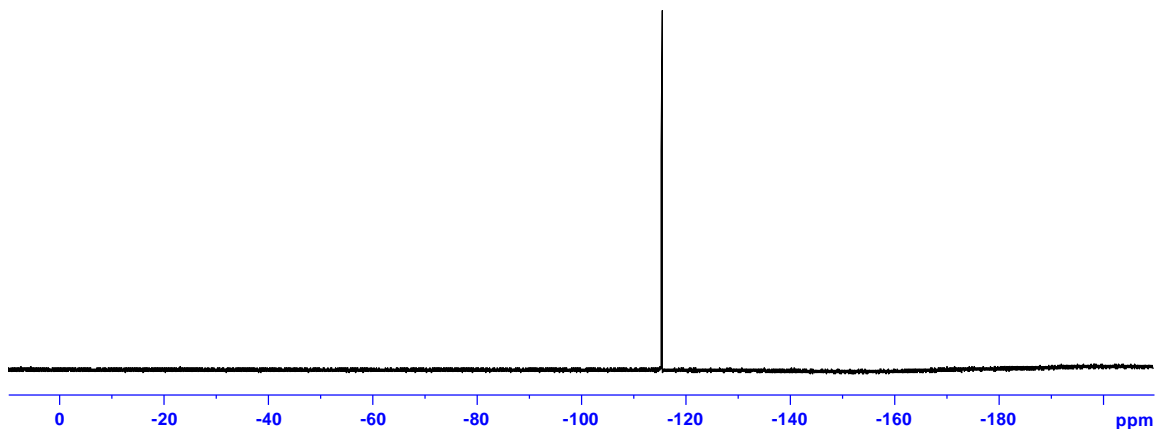

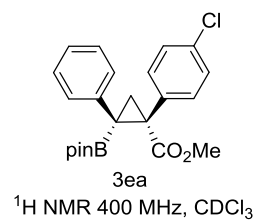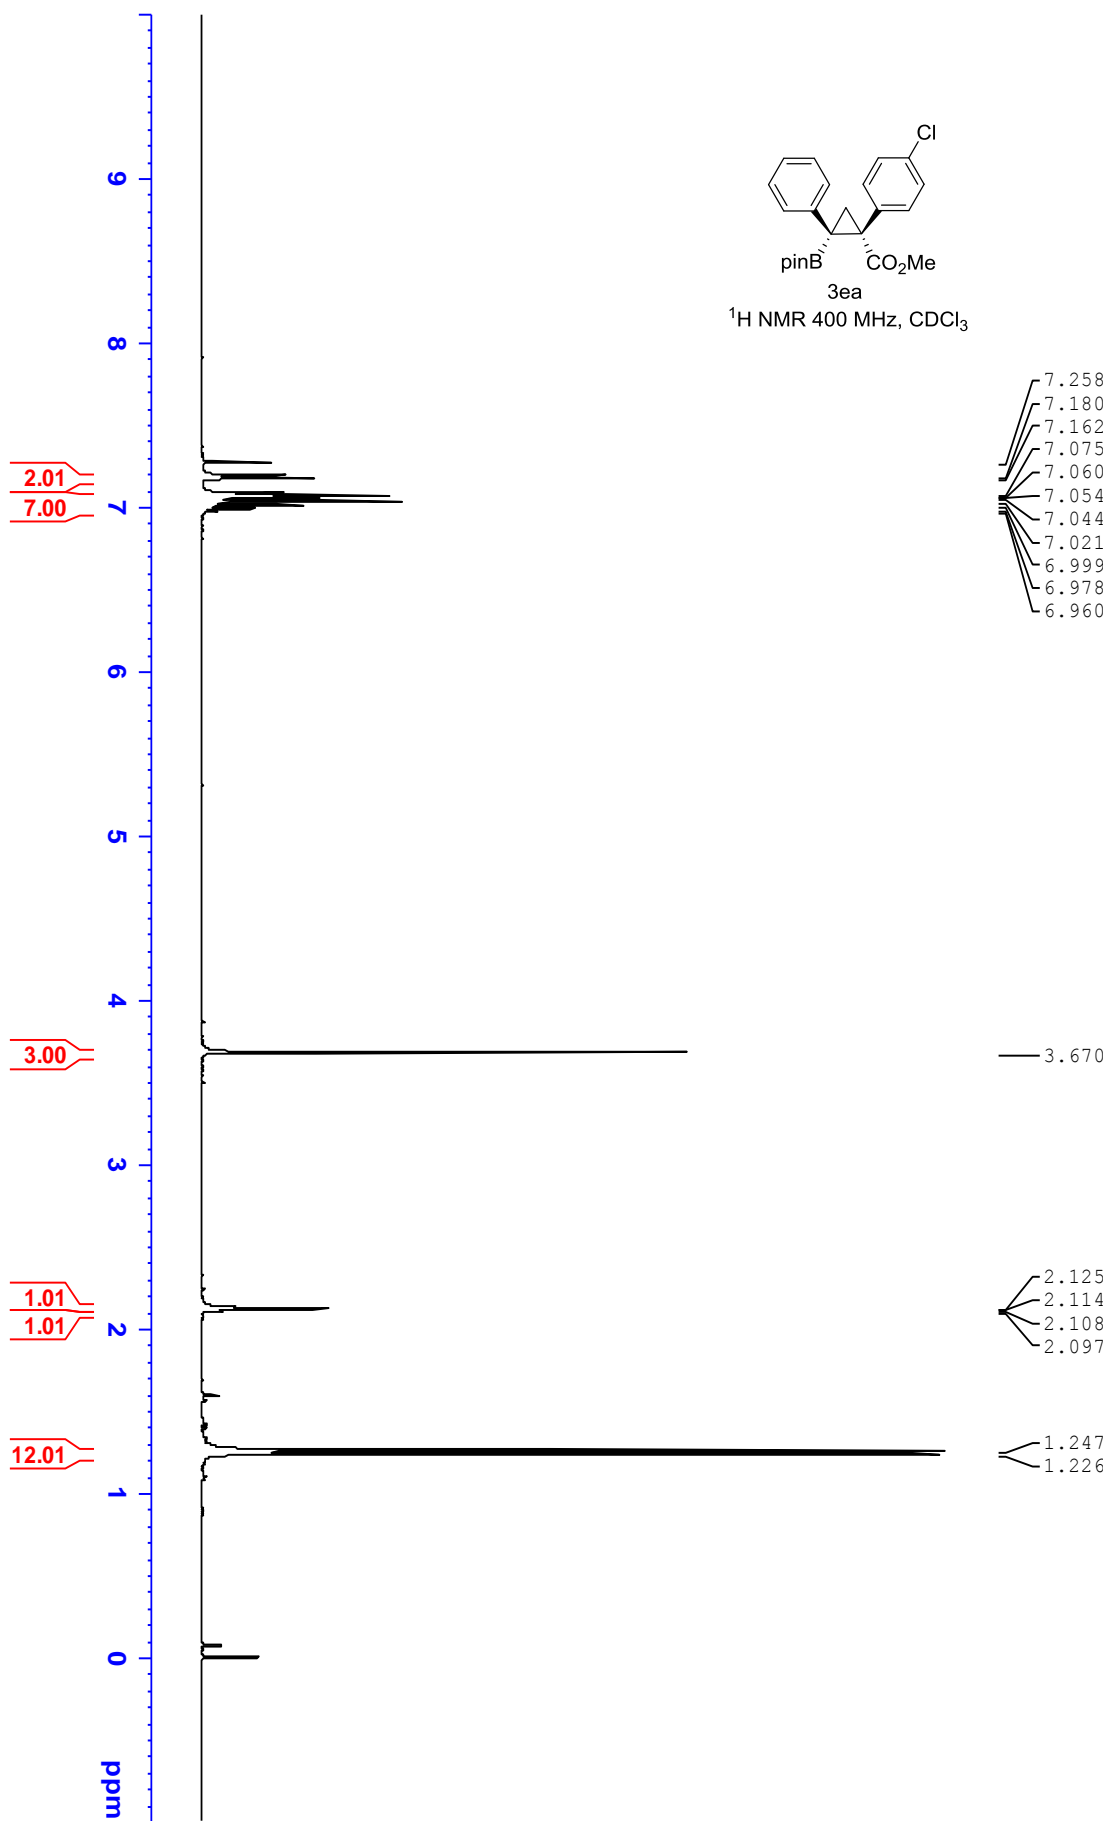

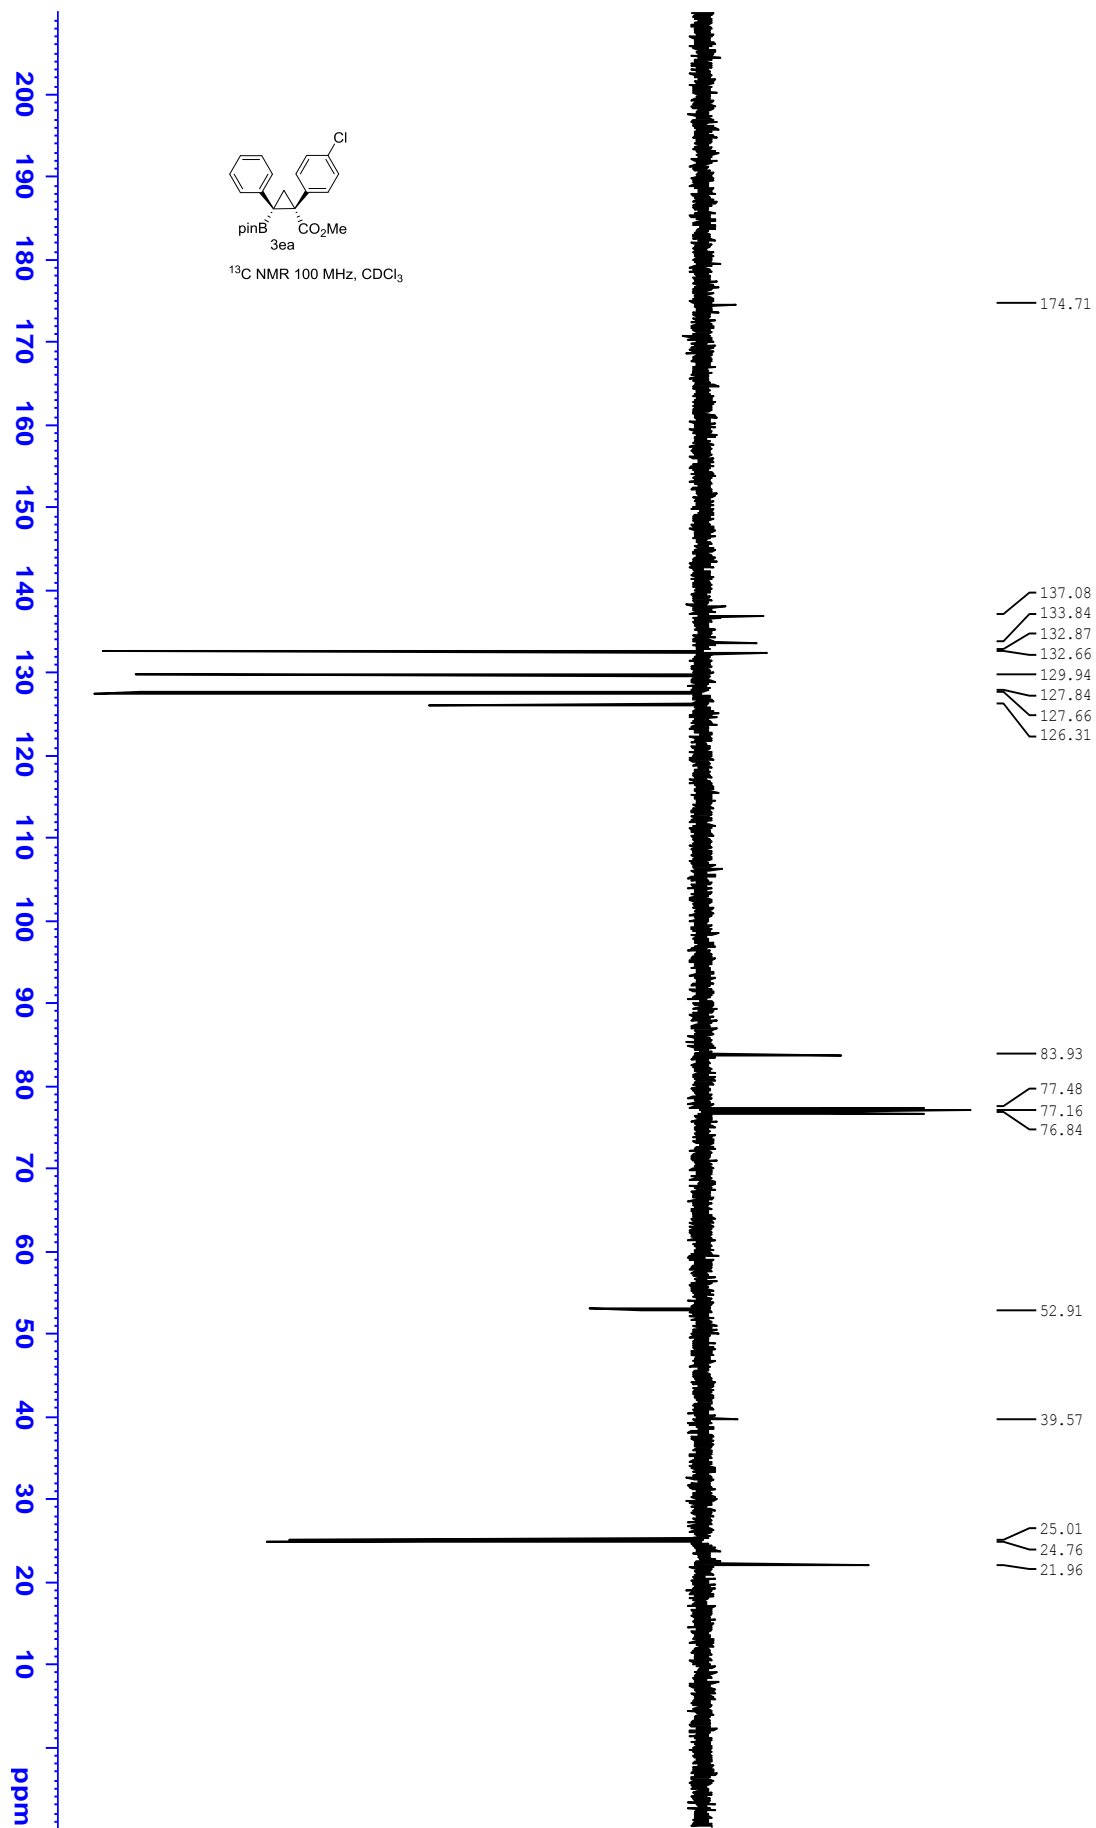

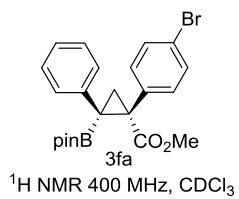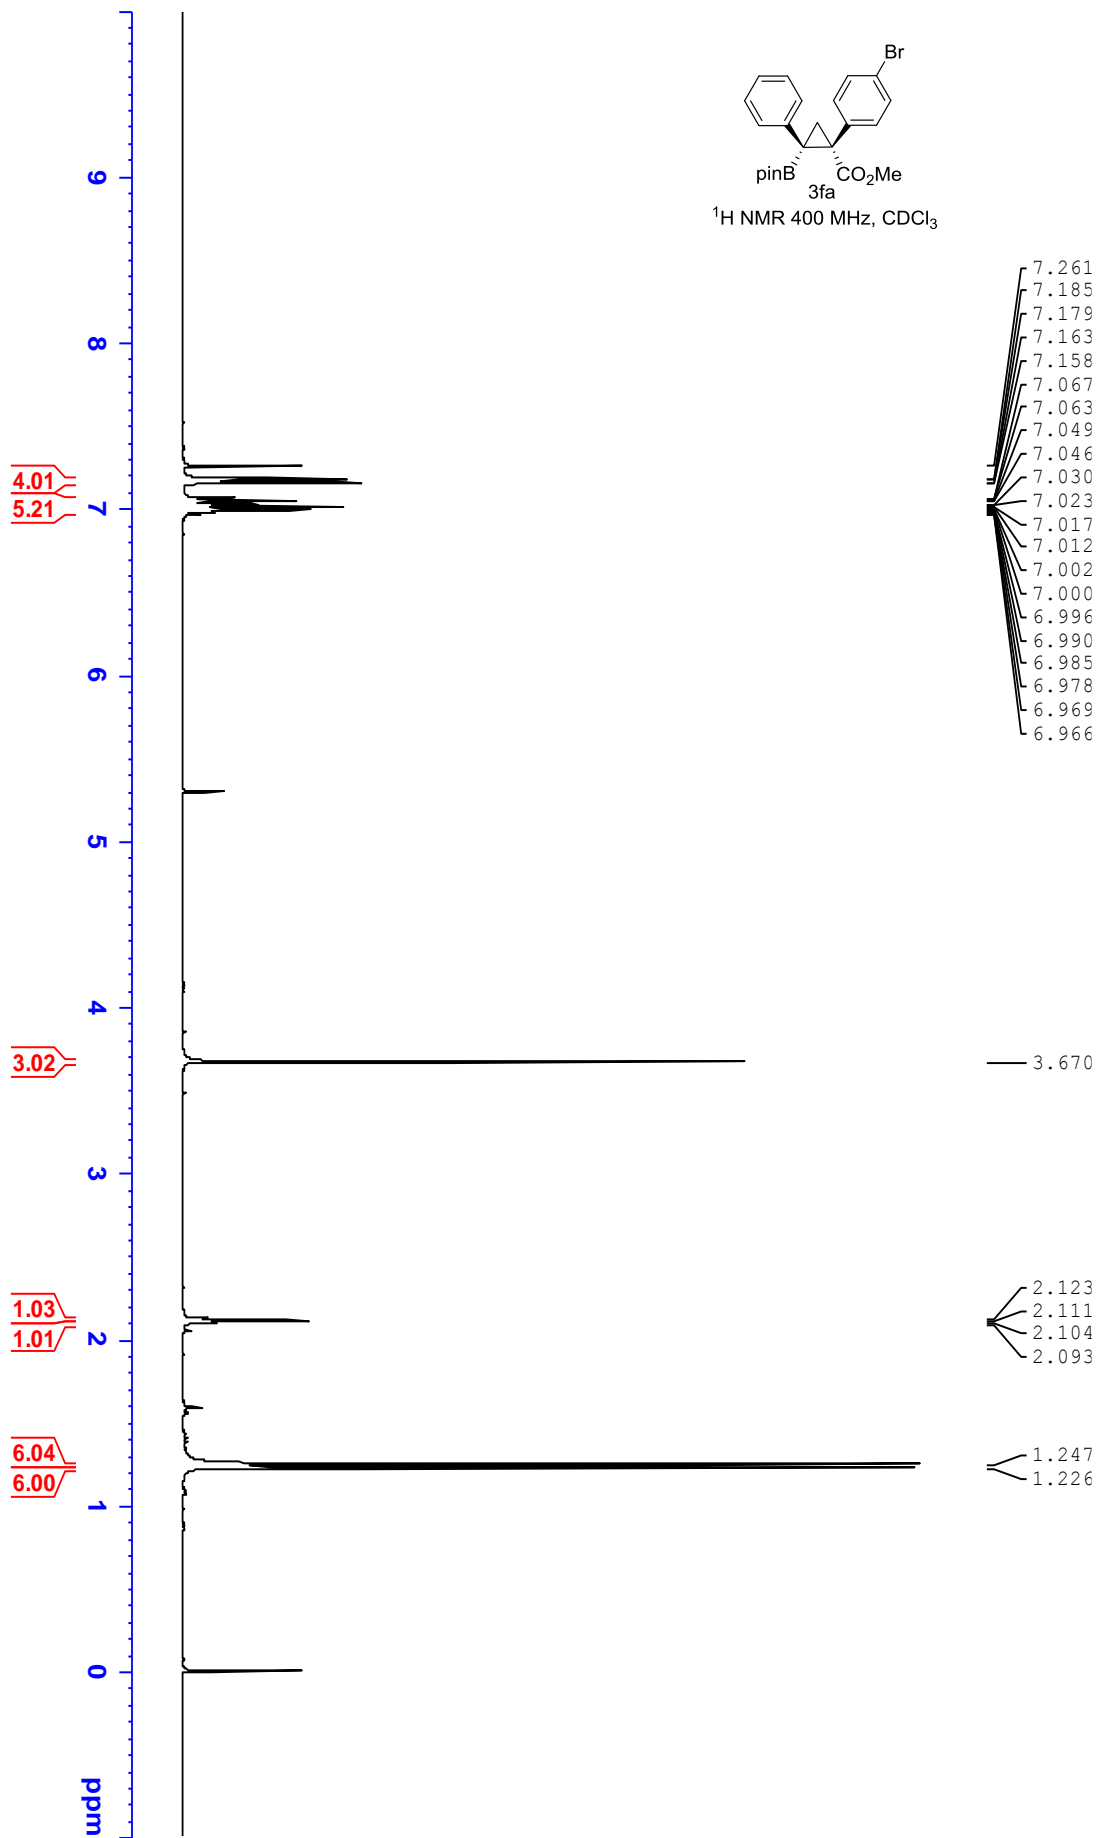

200 190 180 170 160 150 140 130 120 110 100 90 80 70 60 50 40 30 20 10 ppm

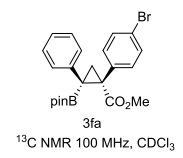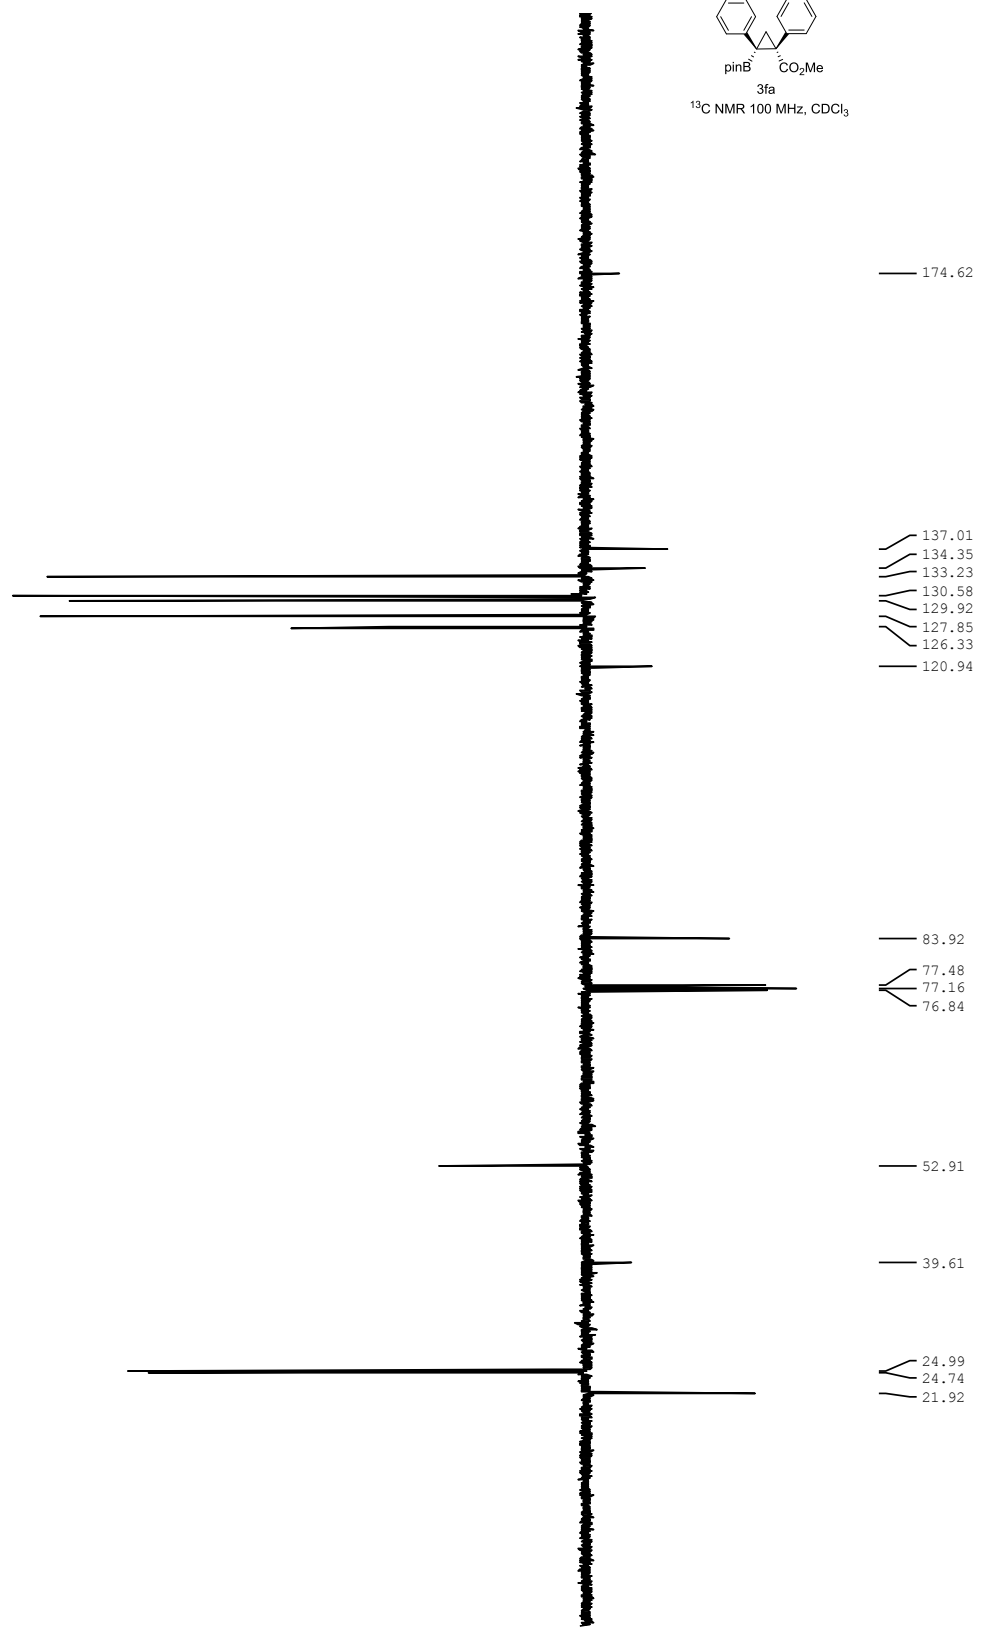

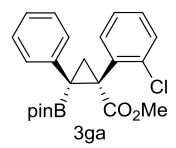

<sup>1</sup>H NMR 400 MHz, CDCl<sub>3</sub>

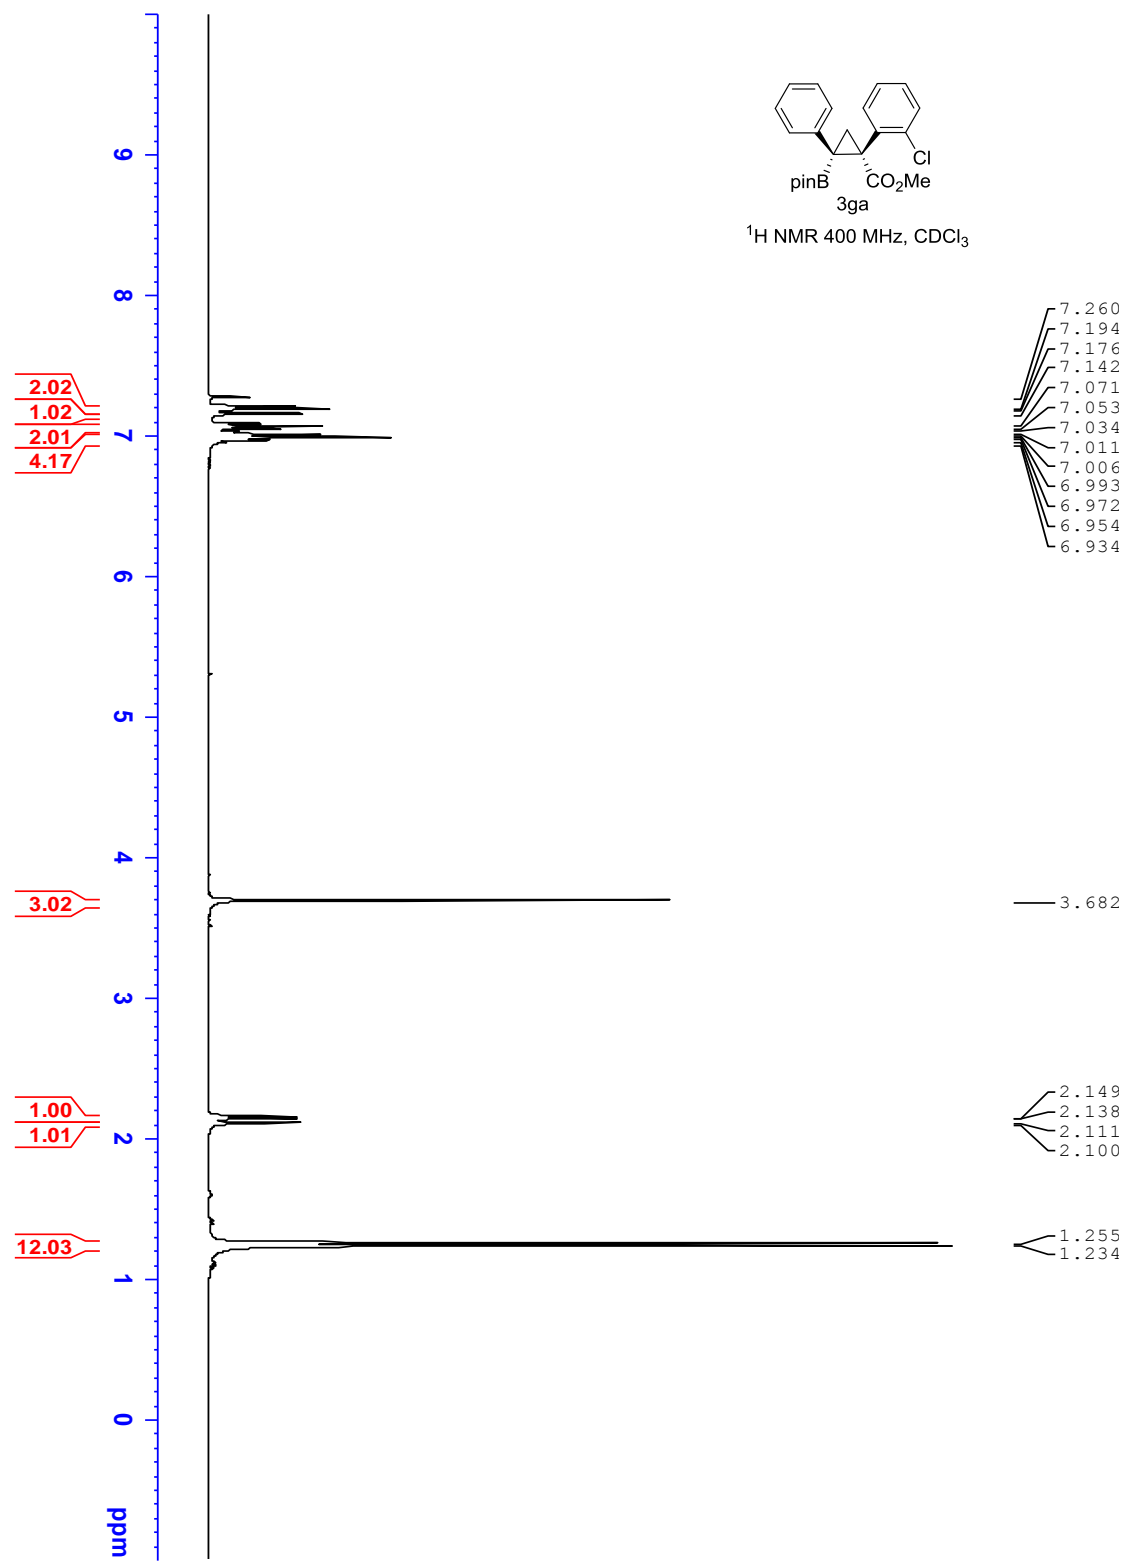



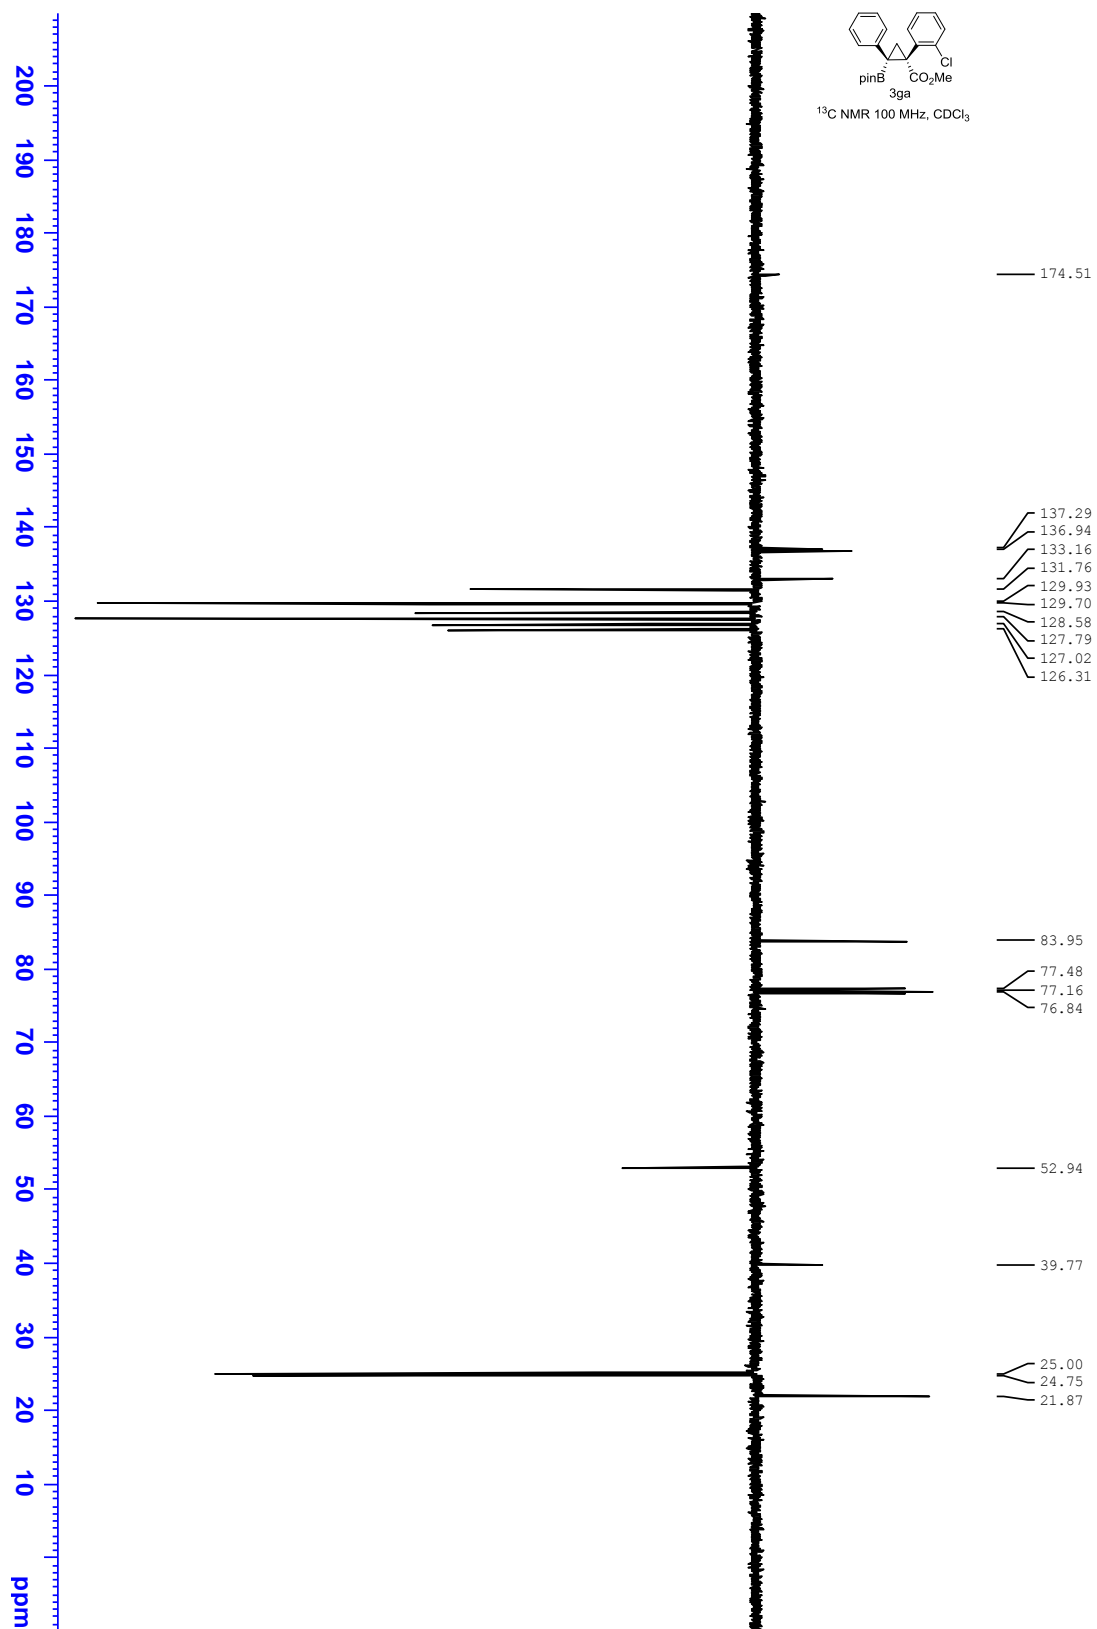

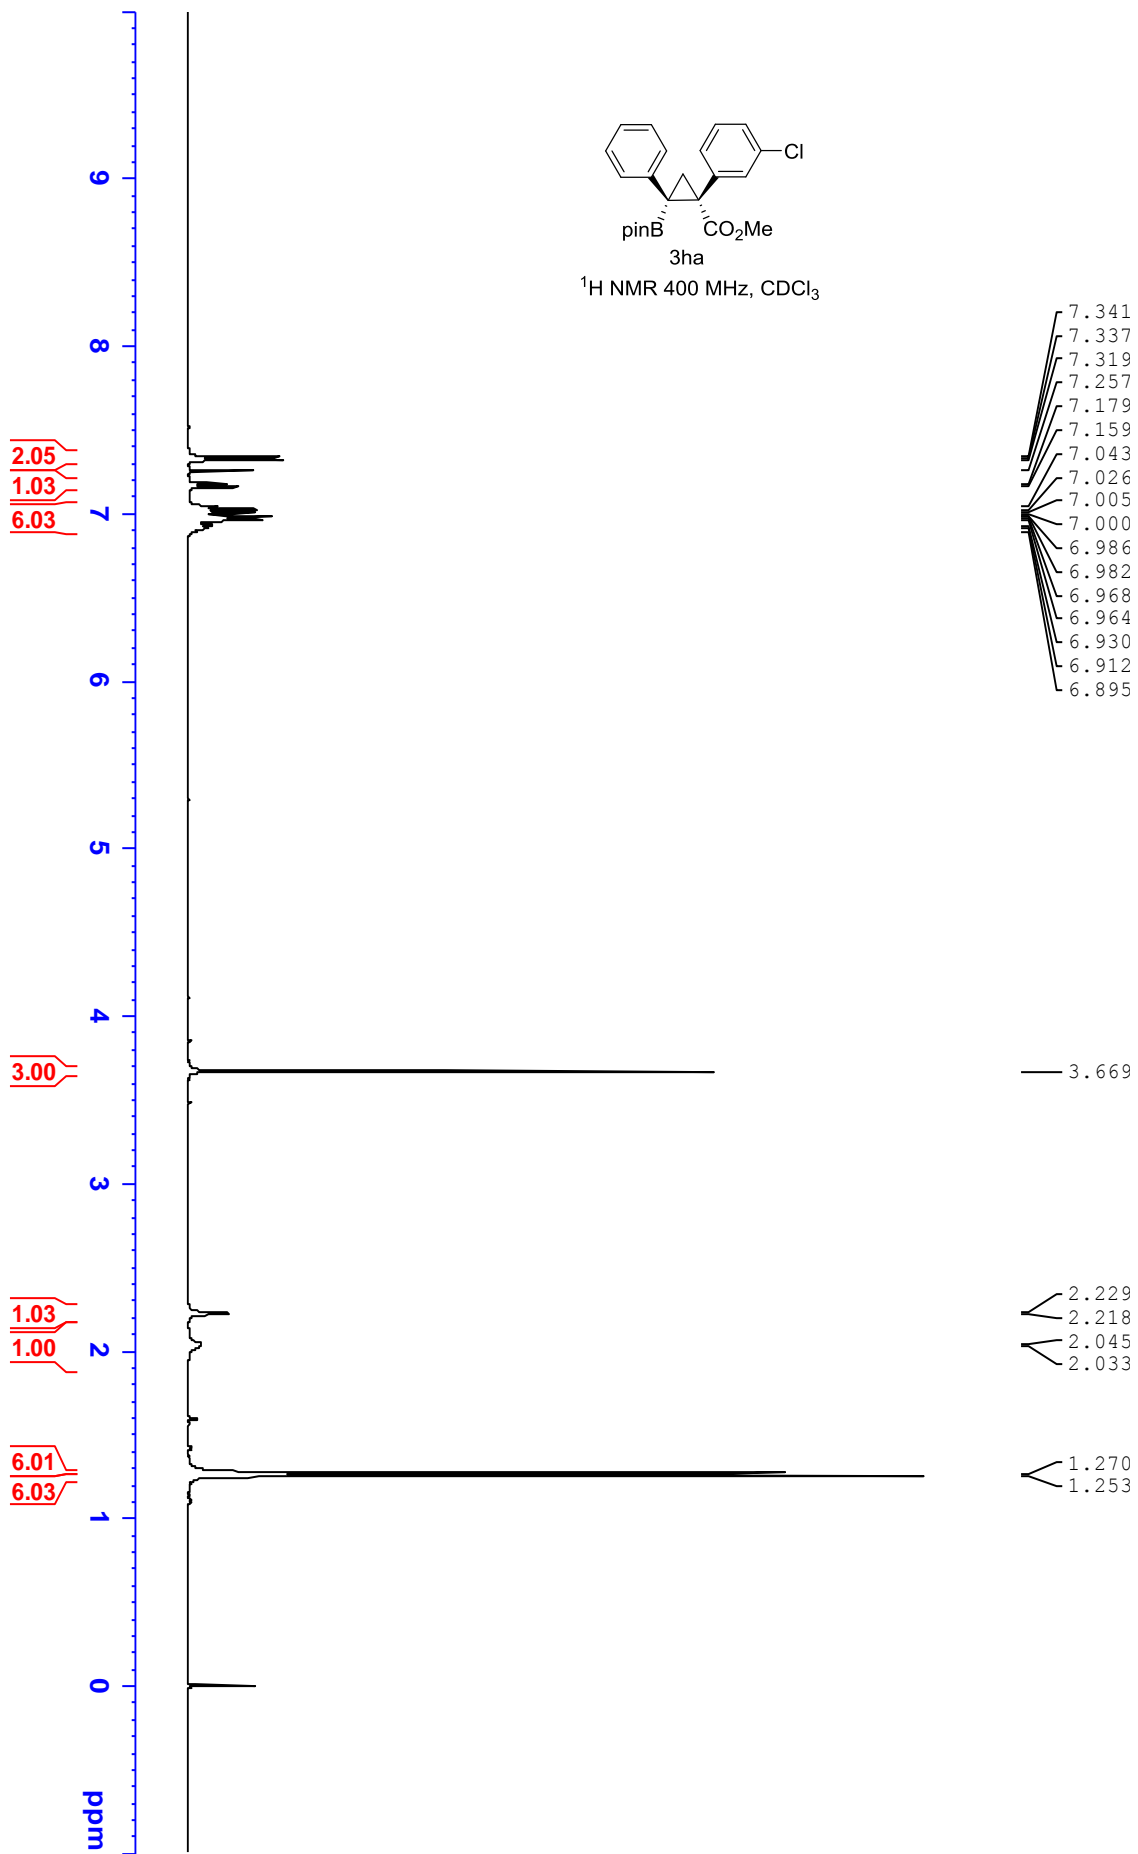

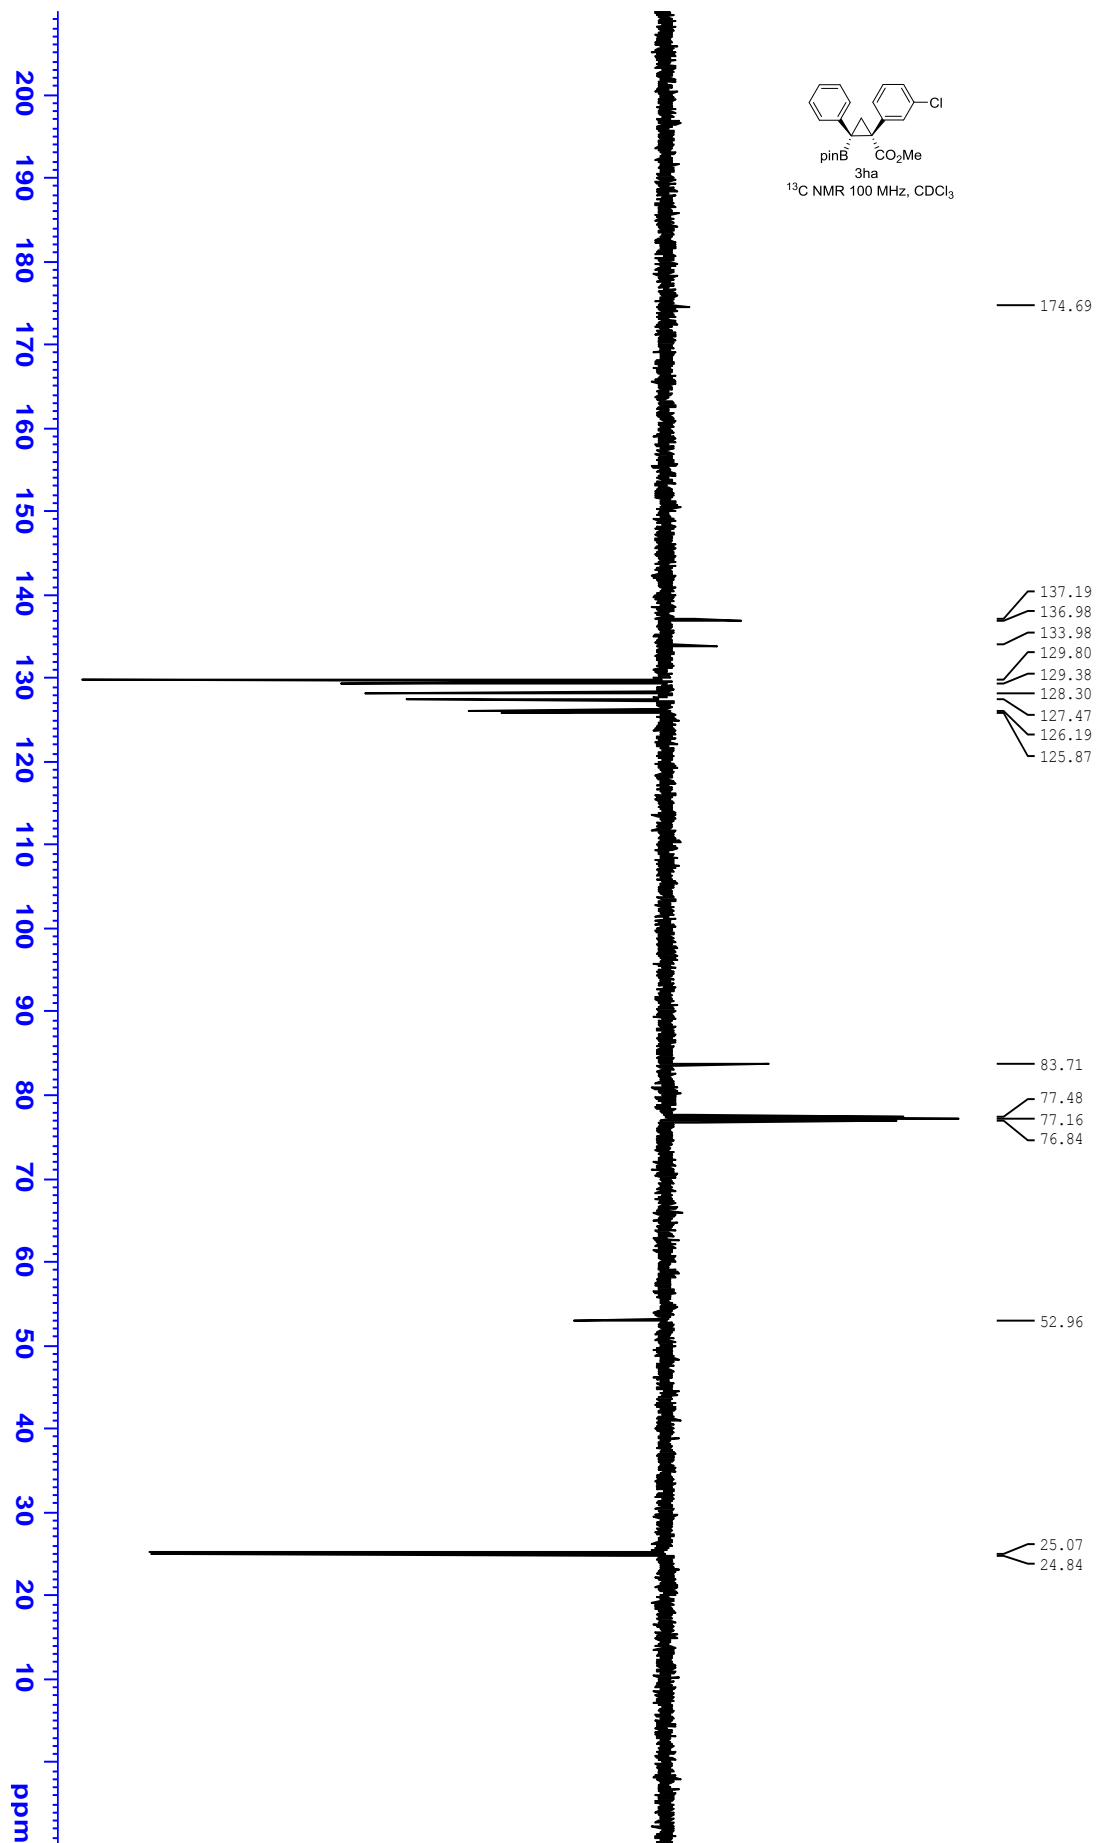

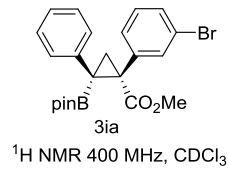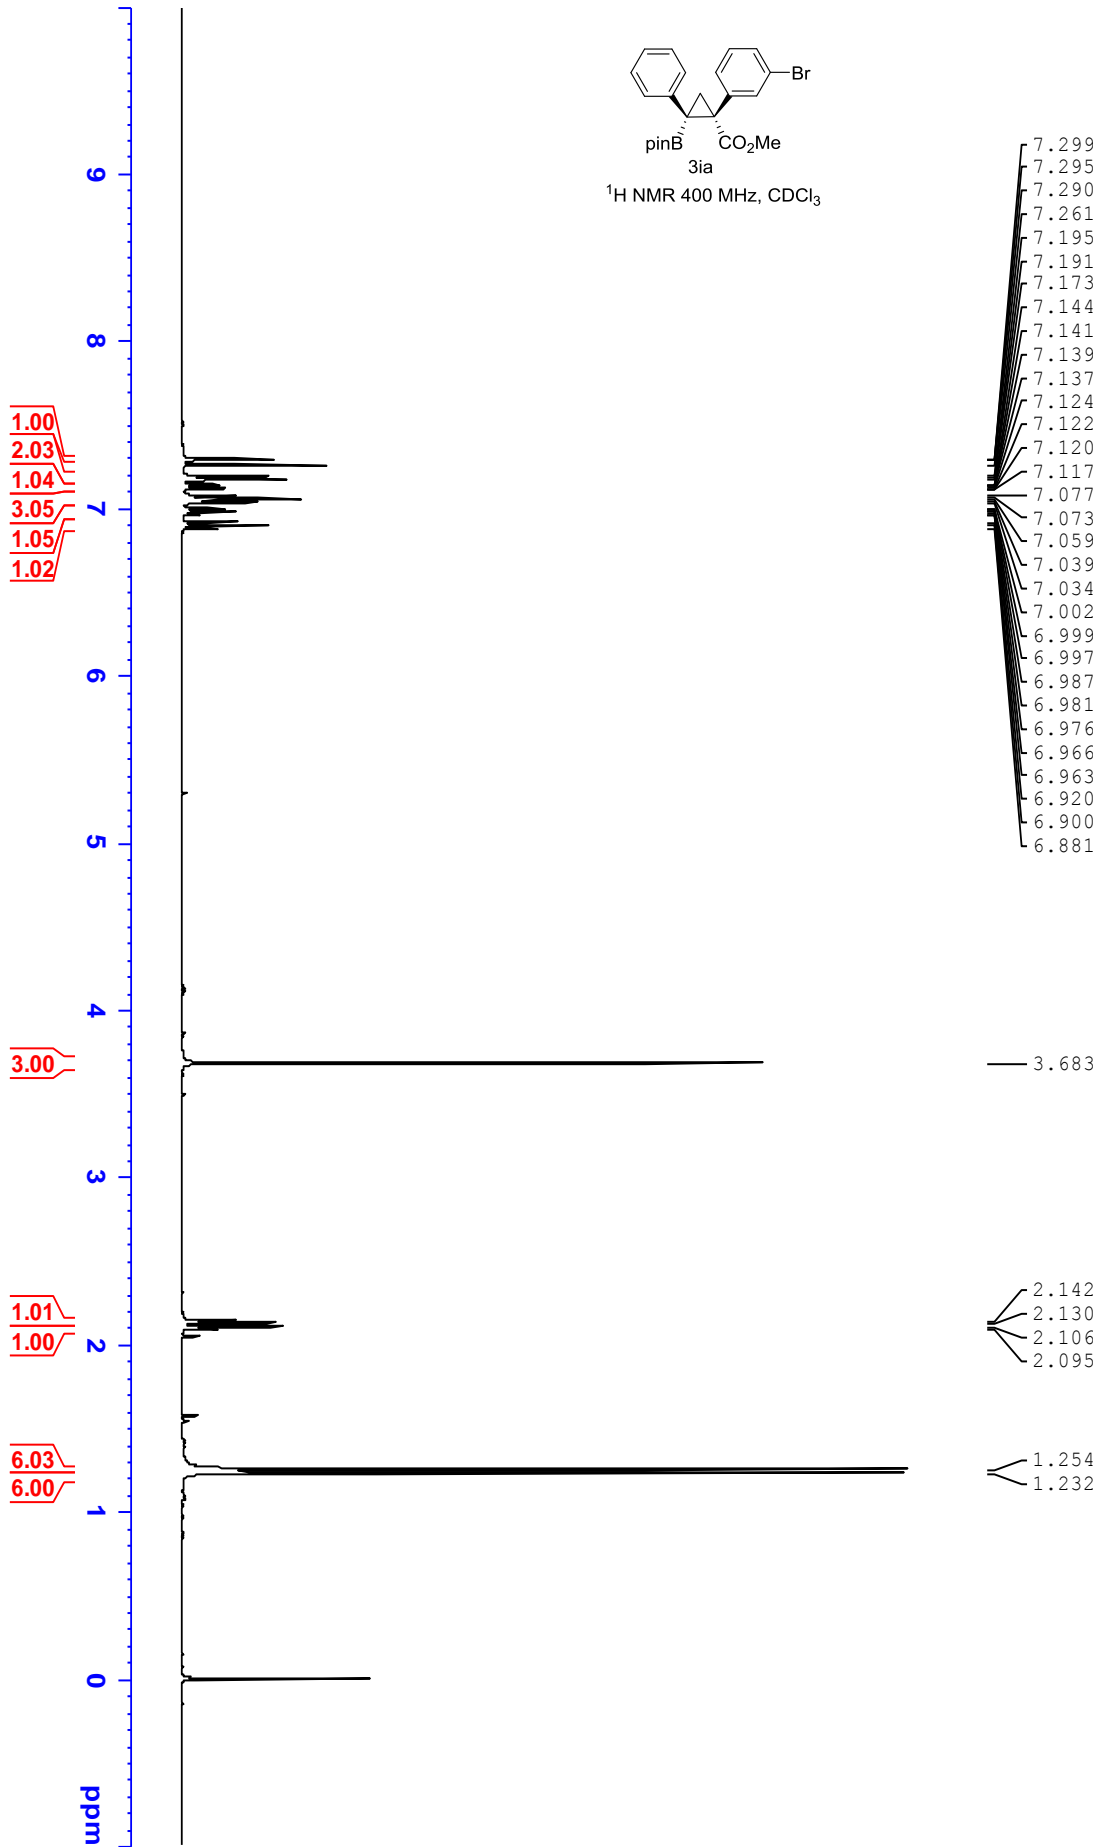

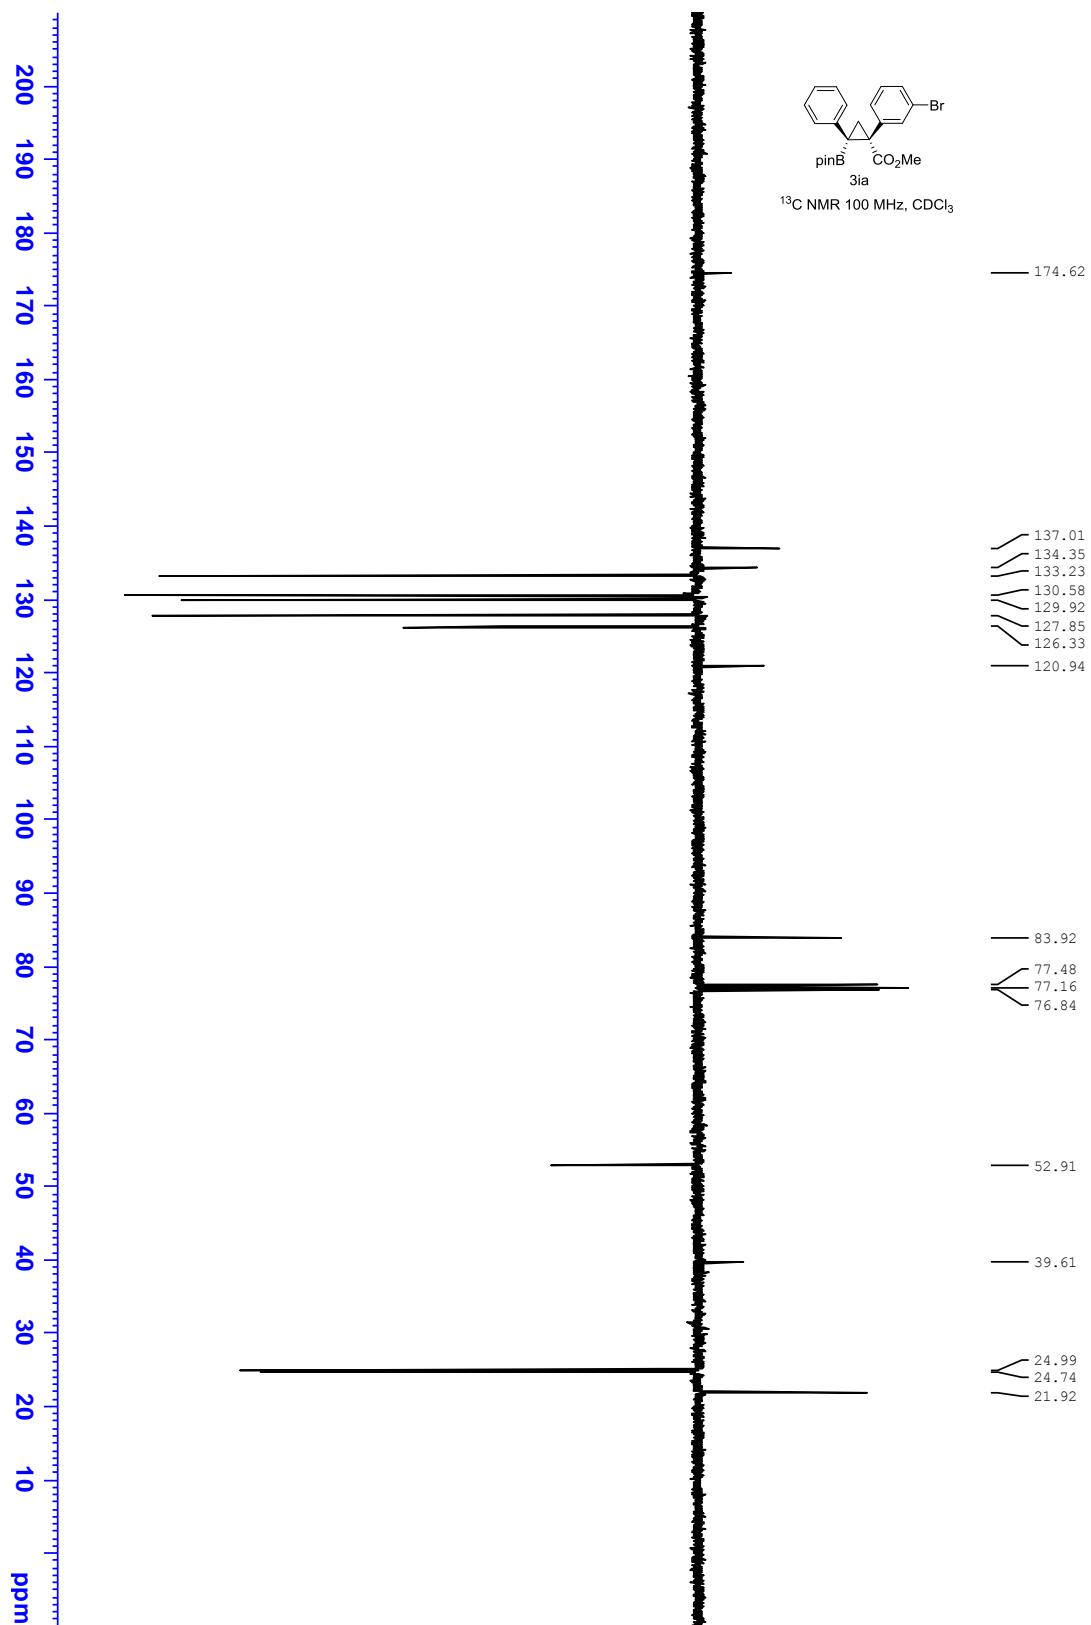

**3ia**  $^{11}\text{B}$  NMR (128 MHz,  $\text{CDCl}_3$ )

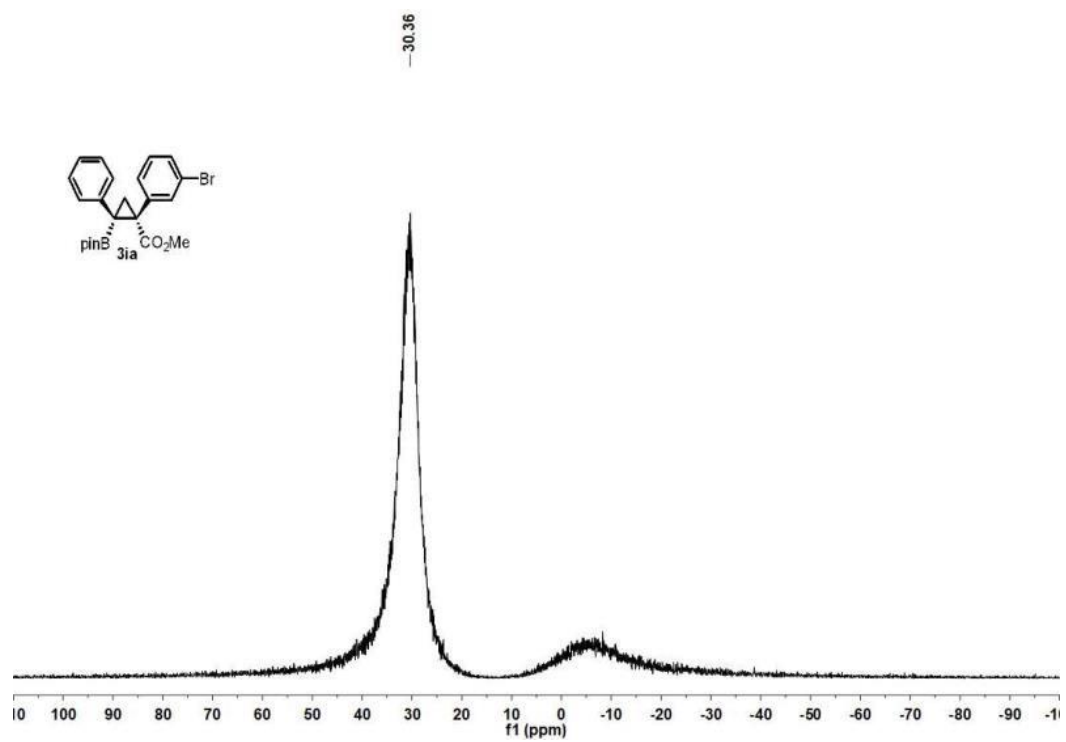

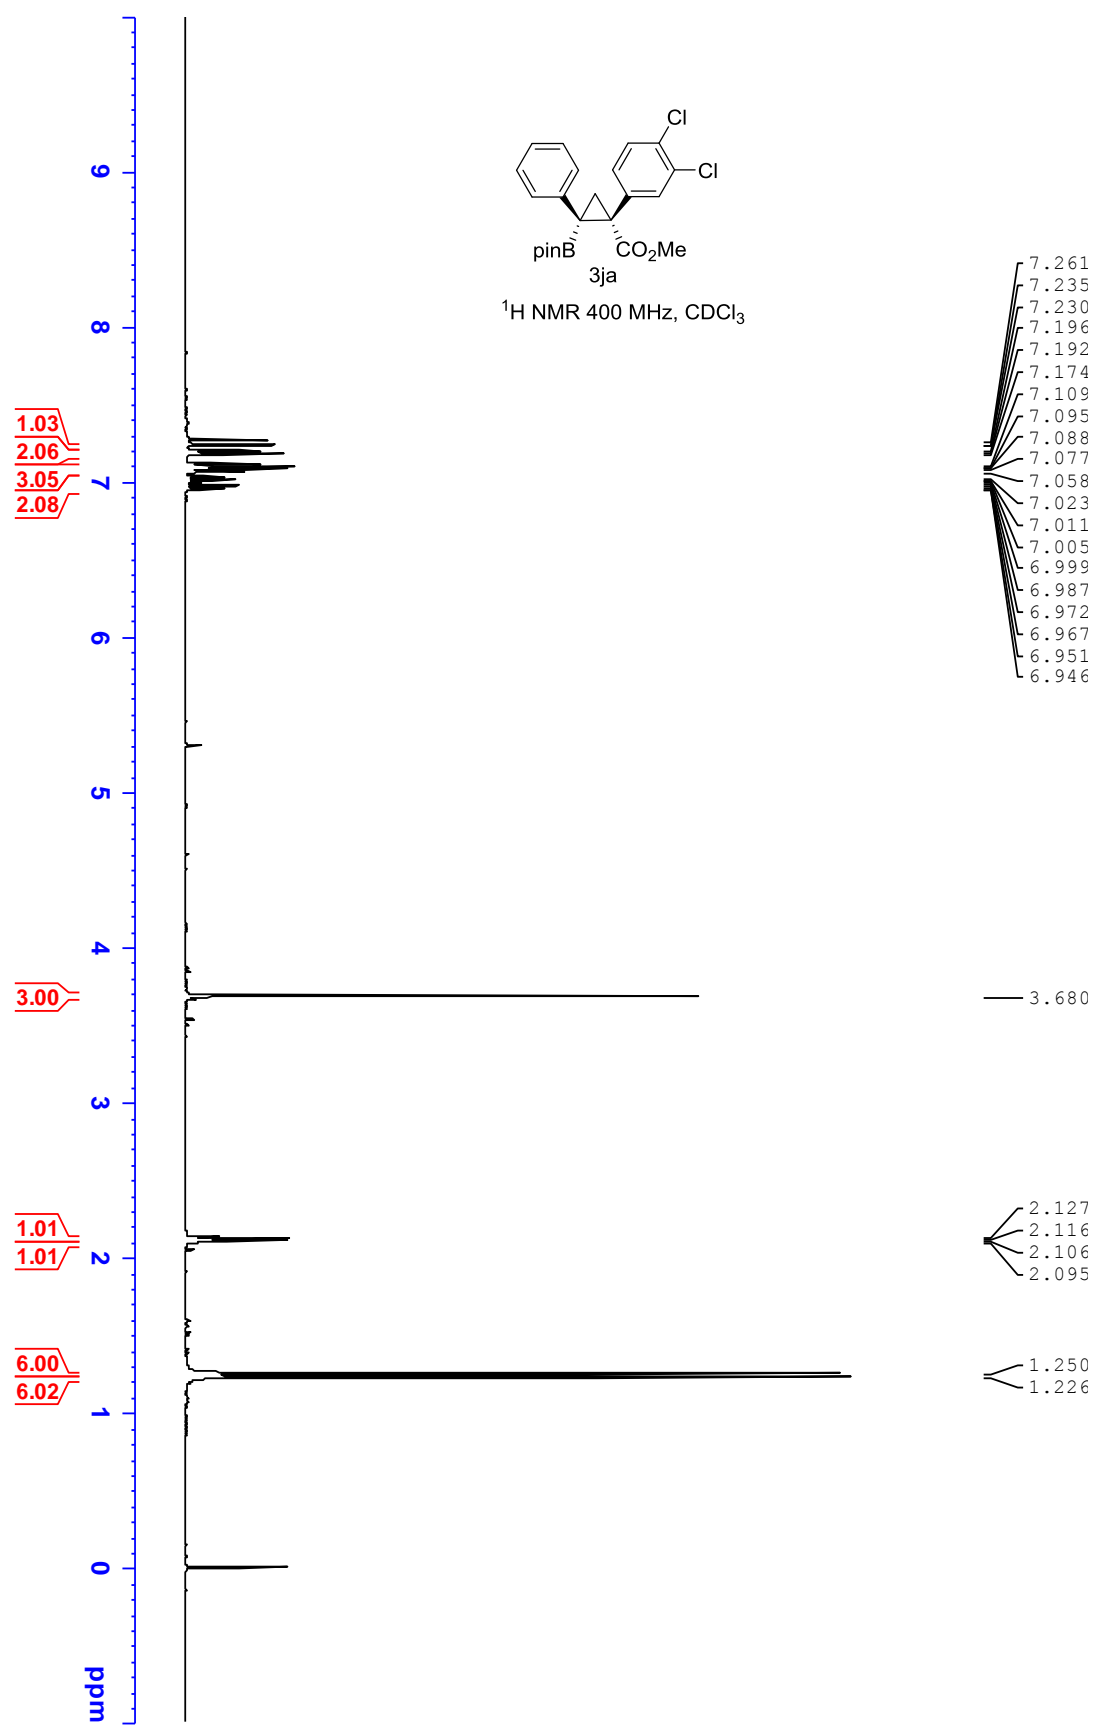

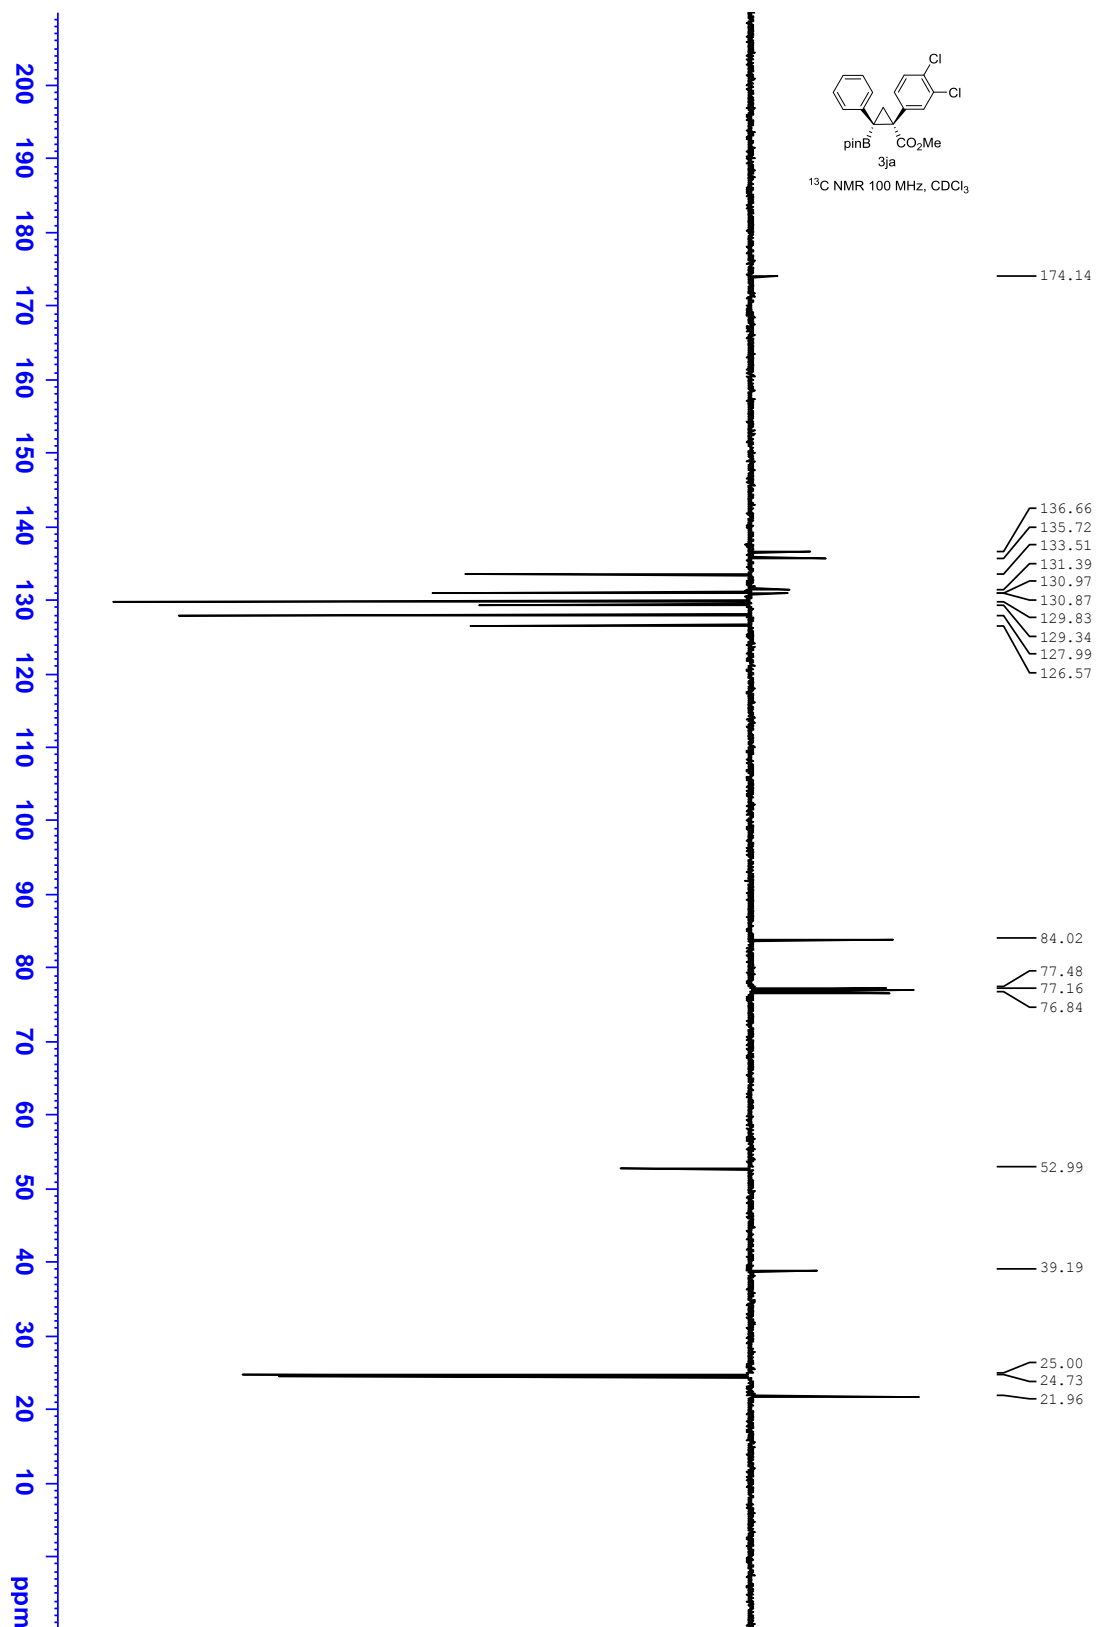



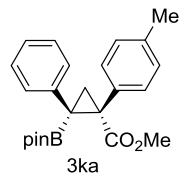

<sup>1</sup>H NMR 400 MHz, CDCl<sub>3</sub>

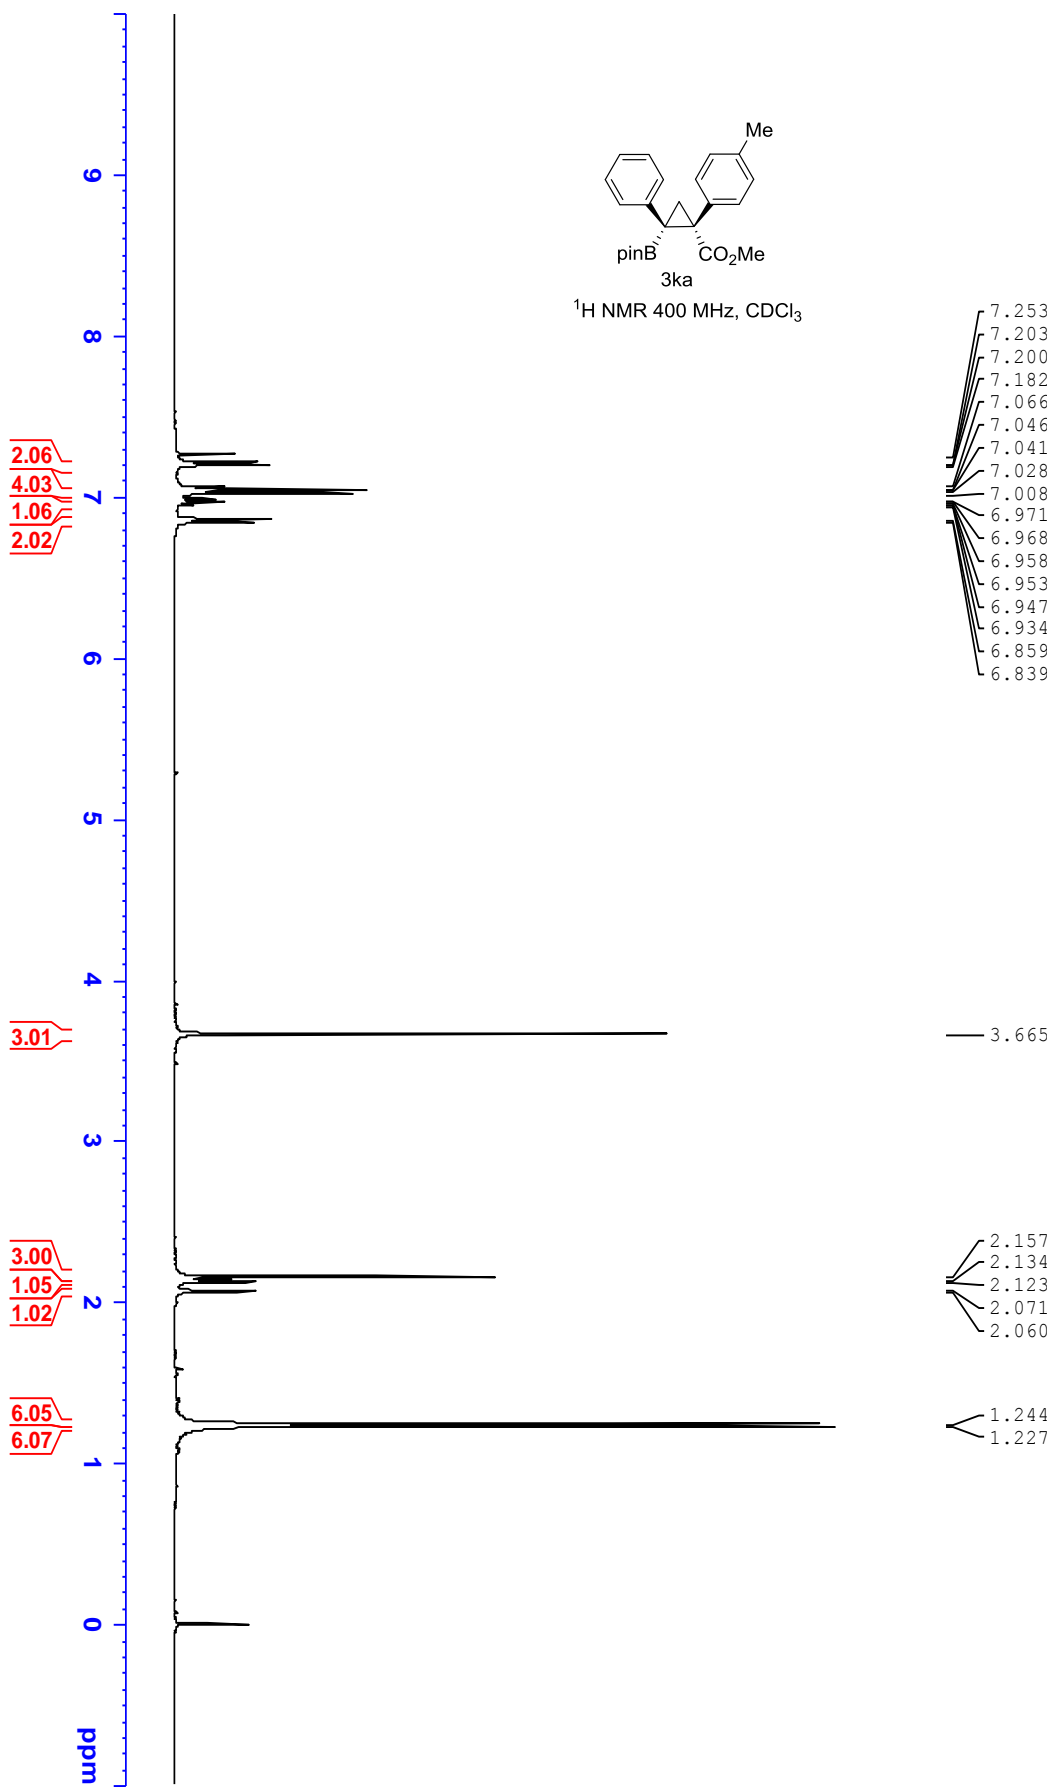

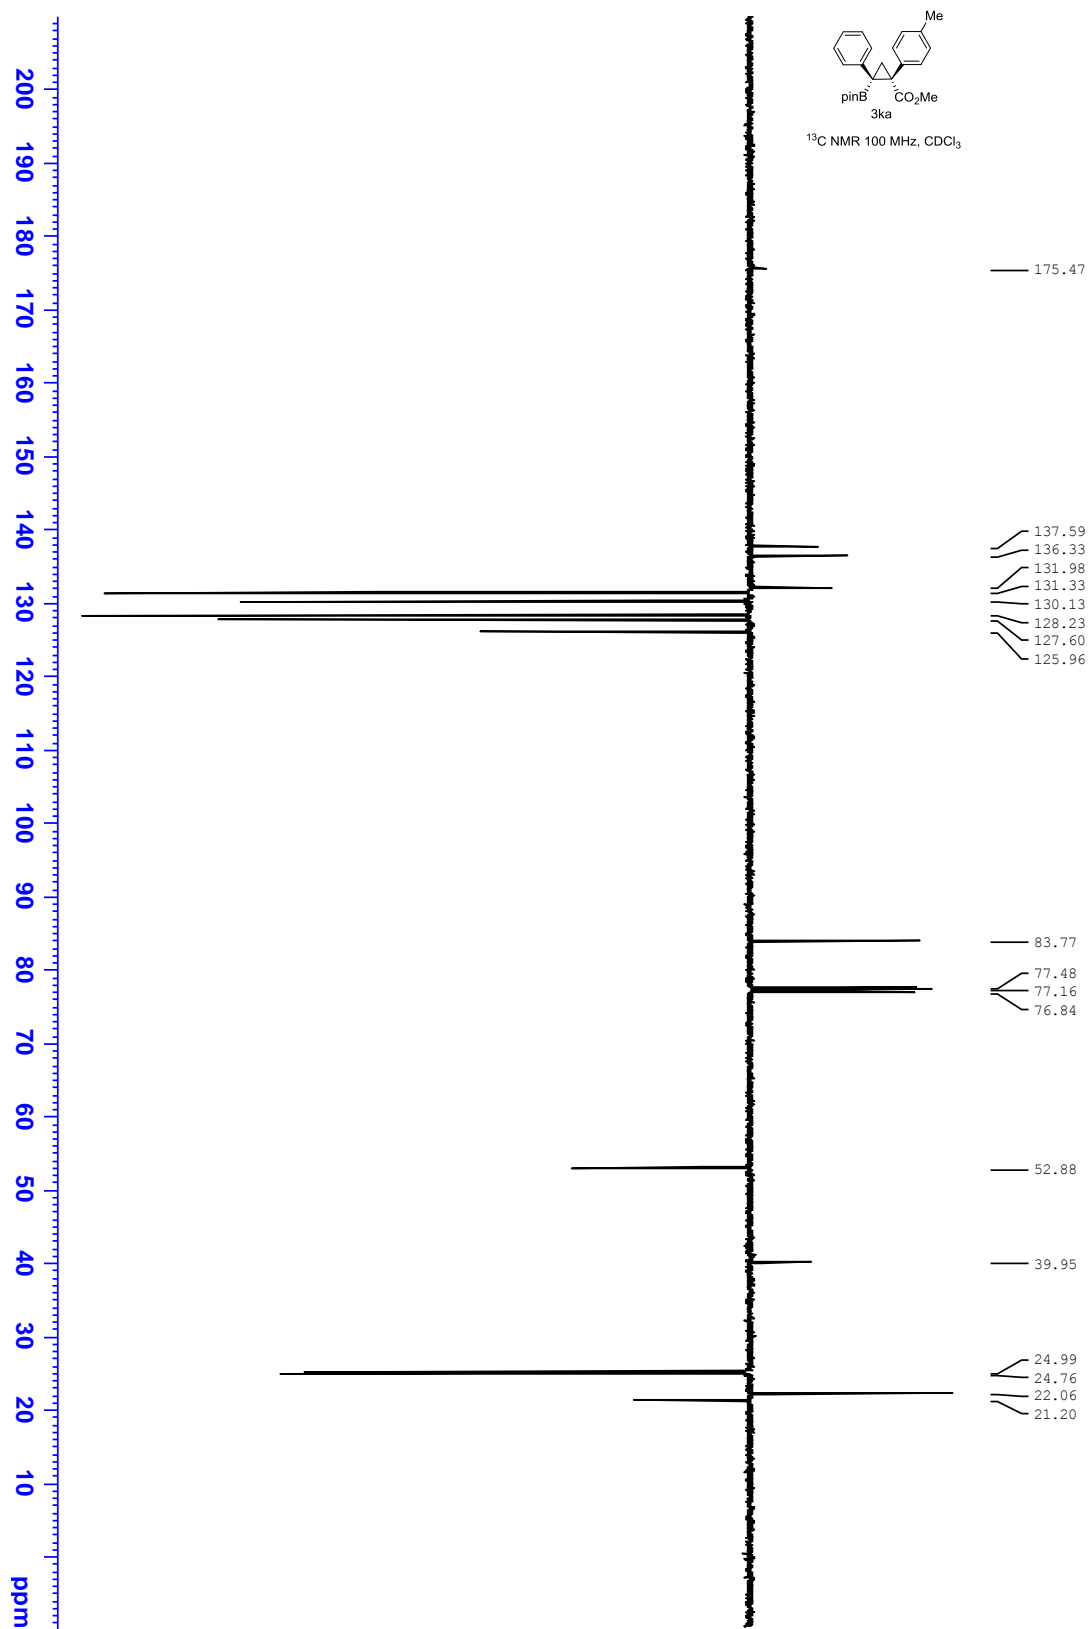

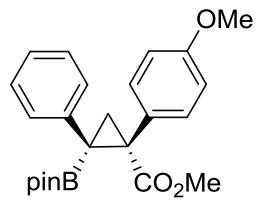

3la  
<sup>1</sup>H NMR 400 MHz, CDCl<sub>3</sub>

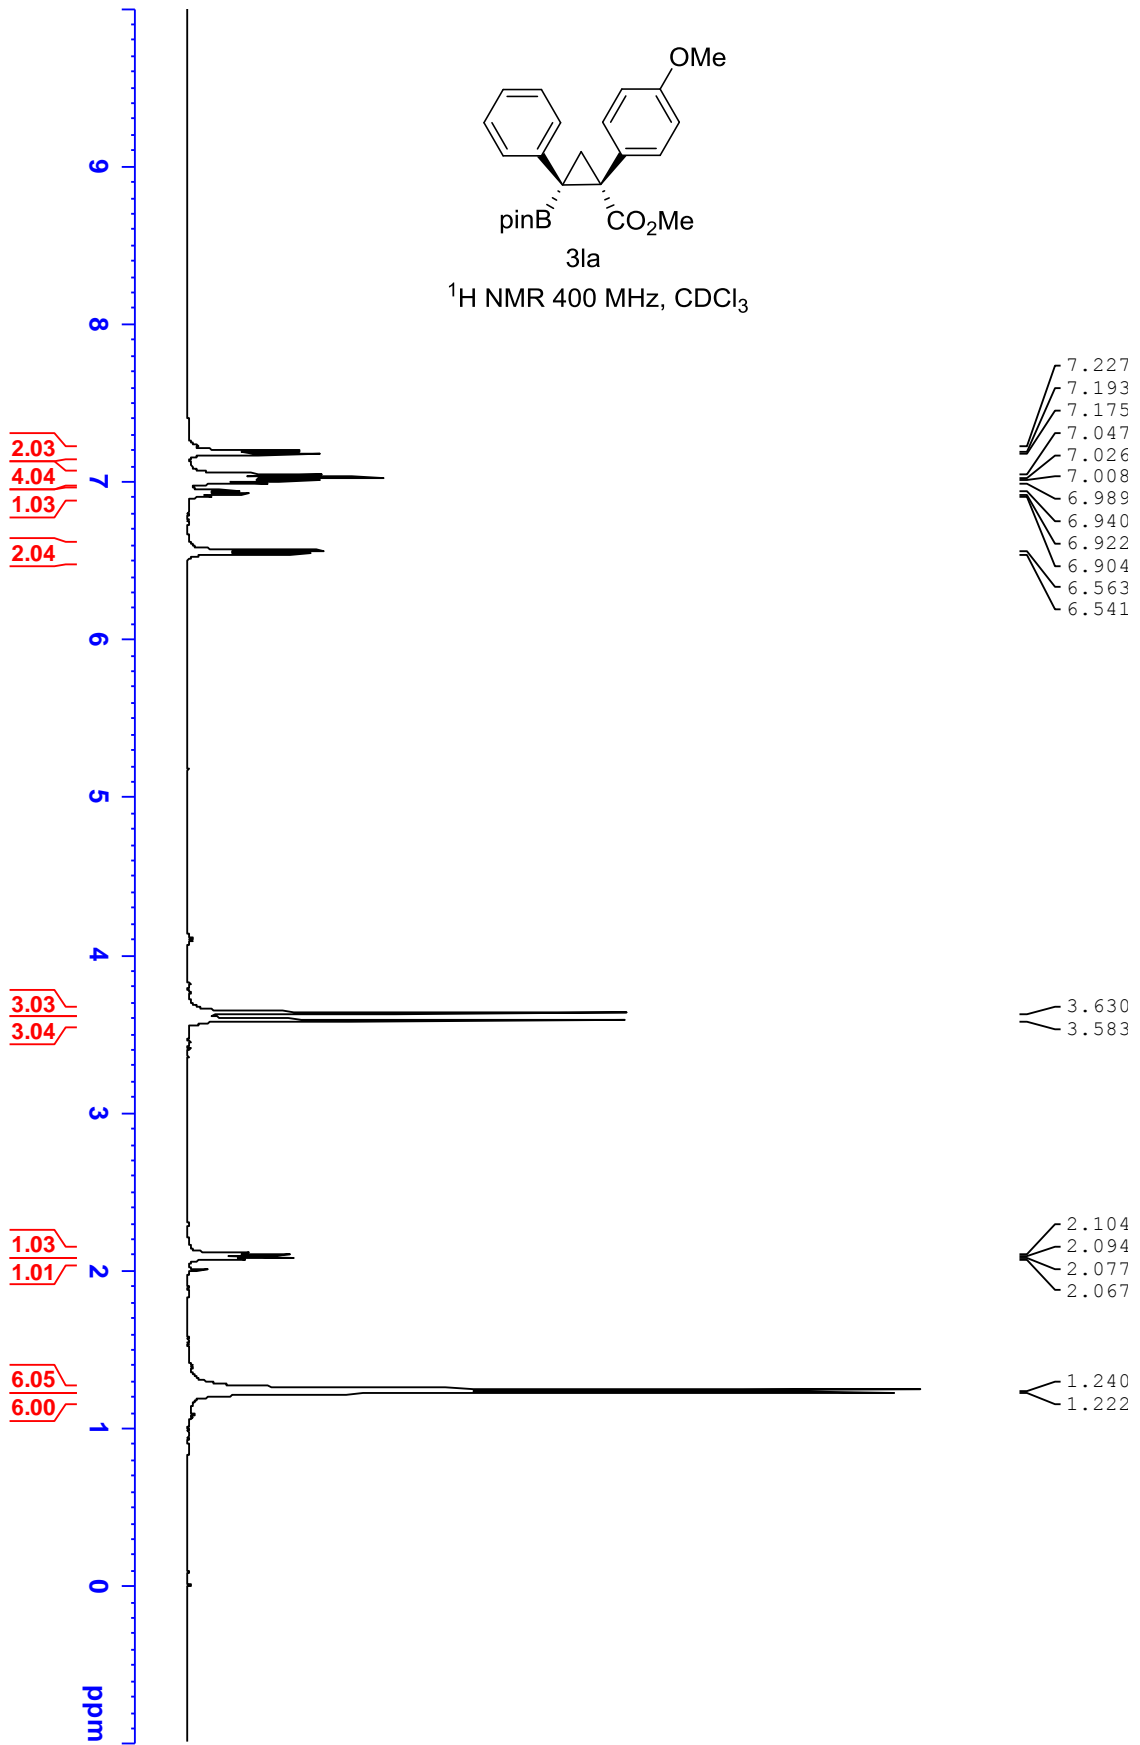

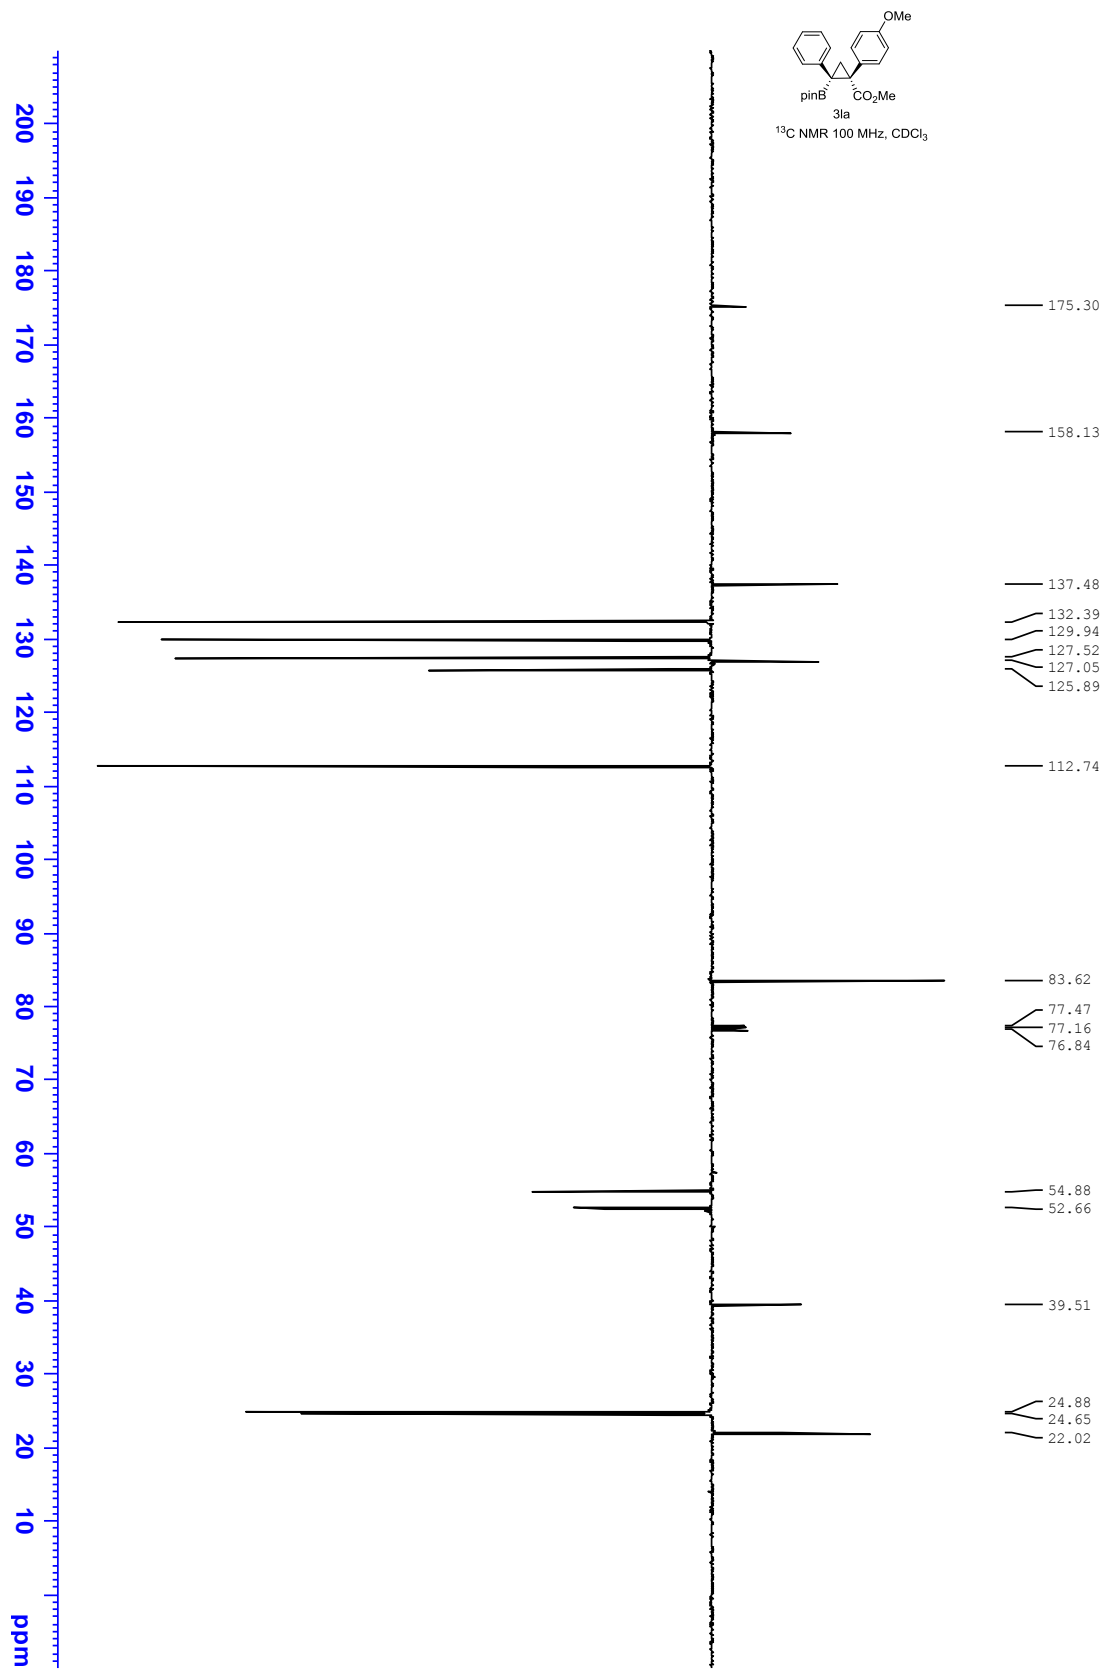

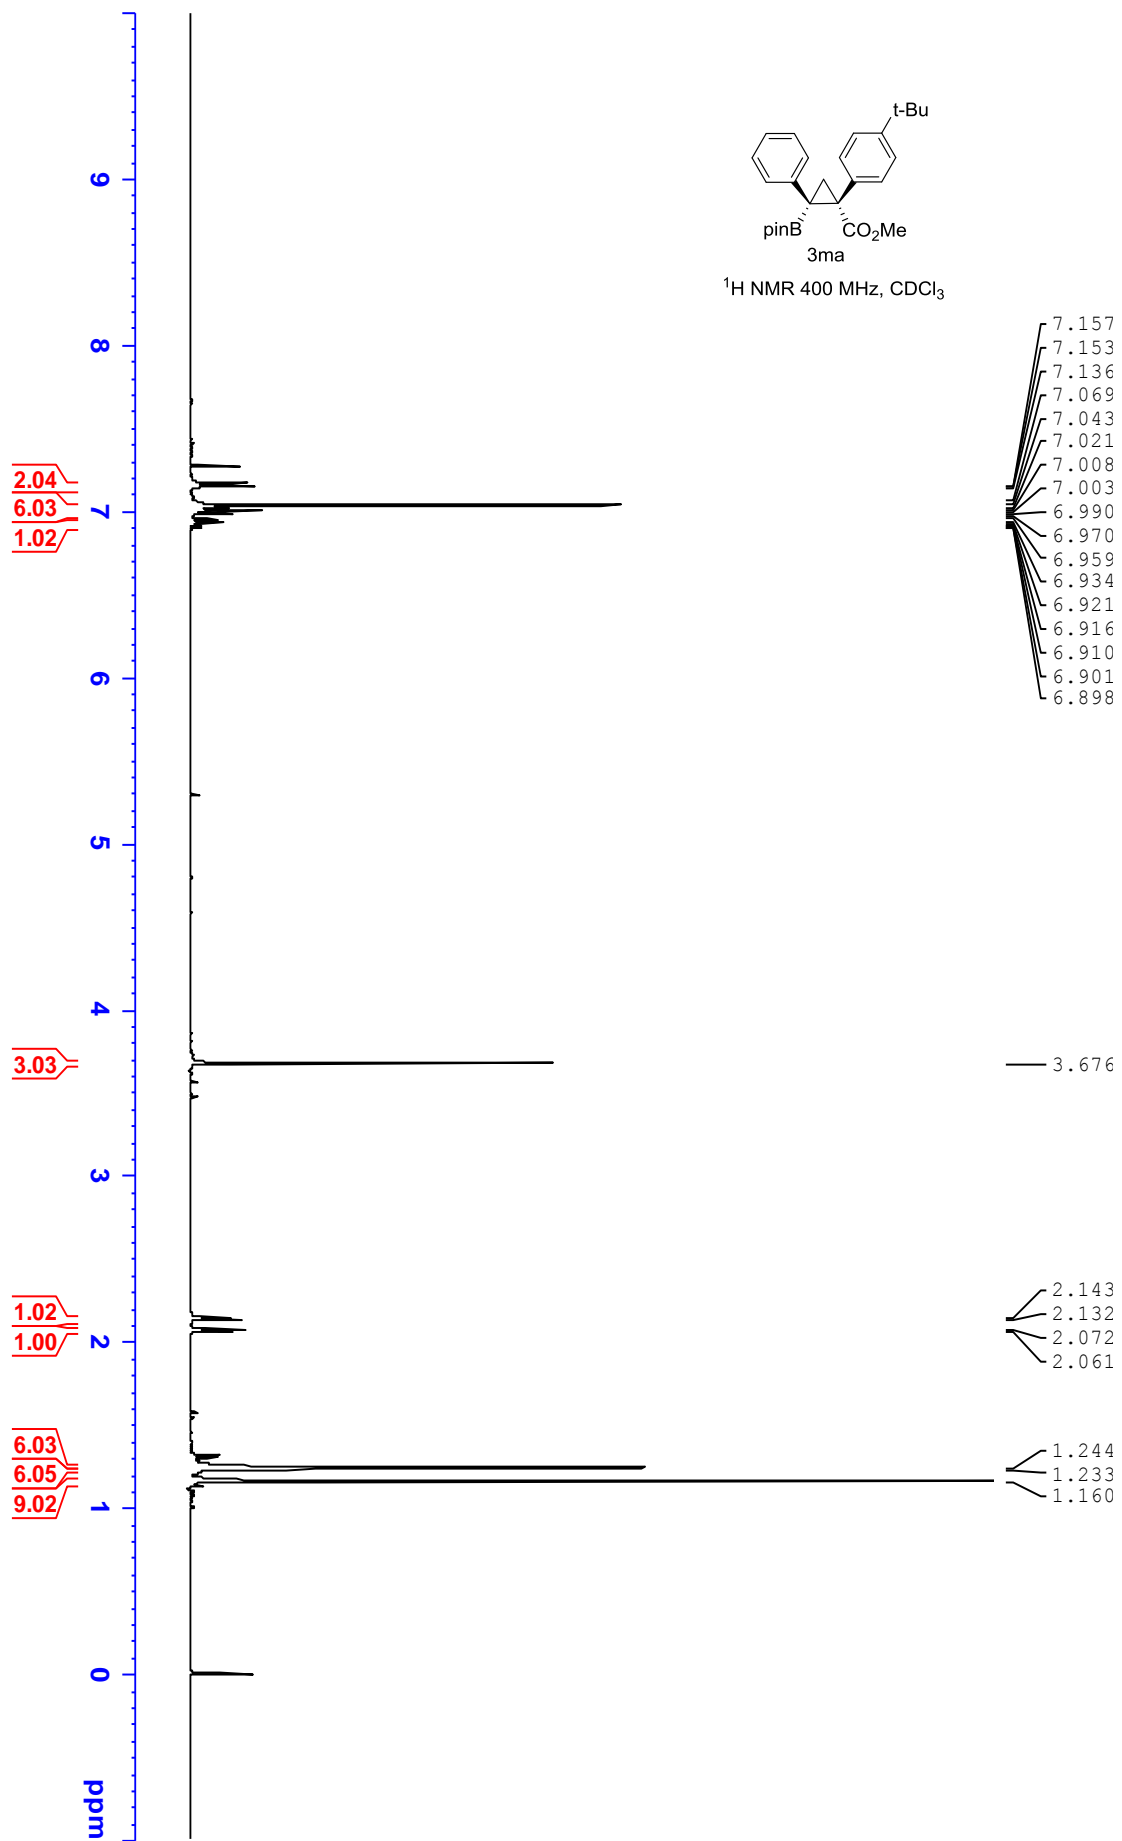

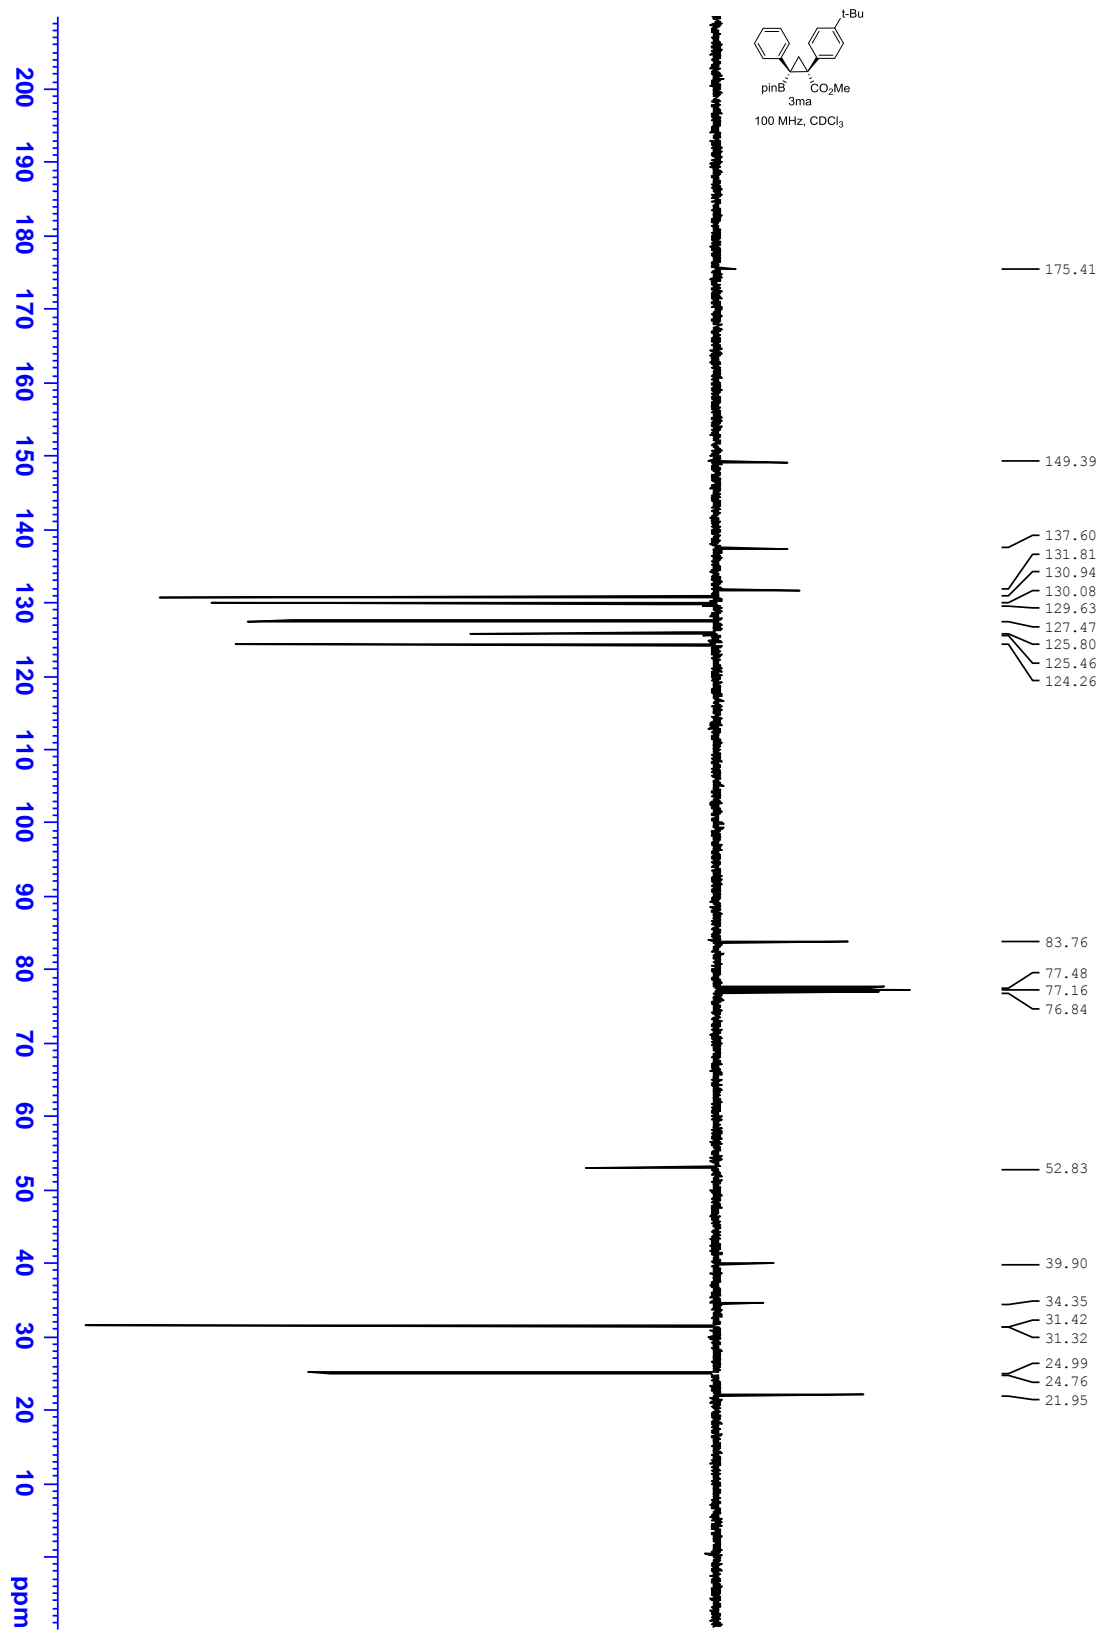

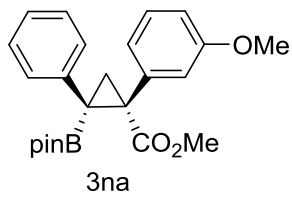

$^{13}\text{C}$  NMR 100 MHz,  $\text{CDCl}_3$

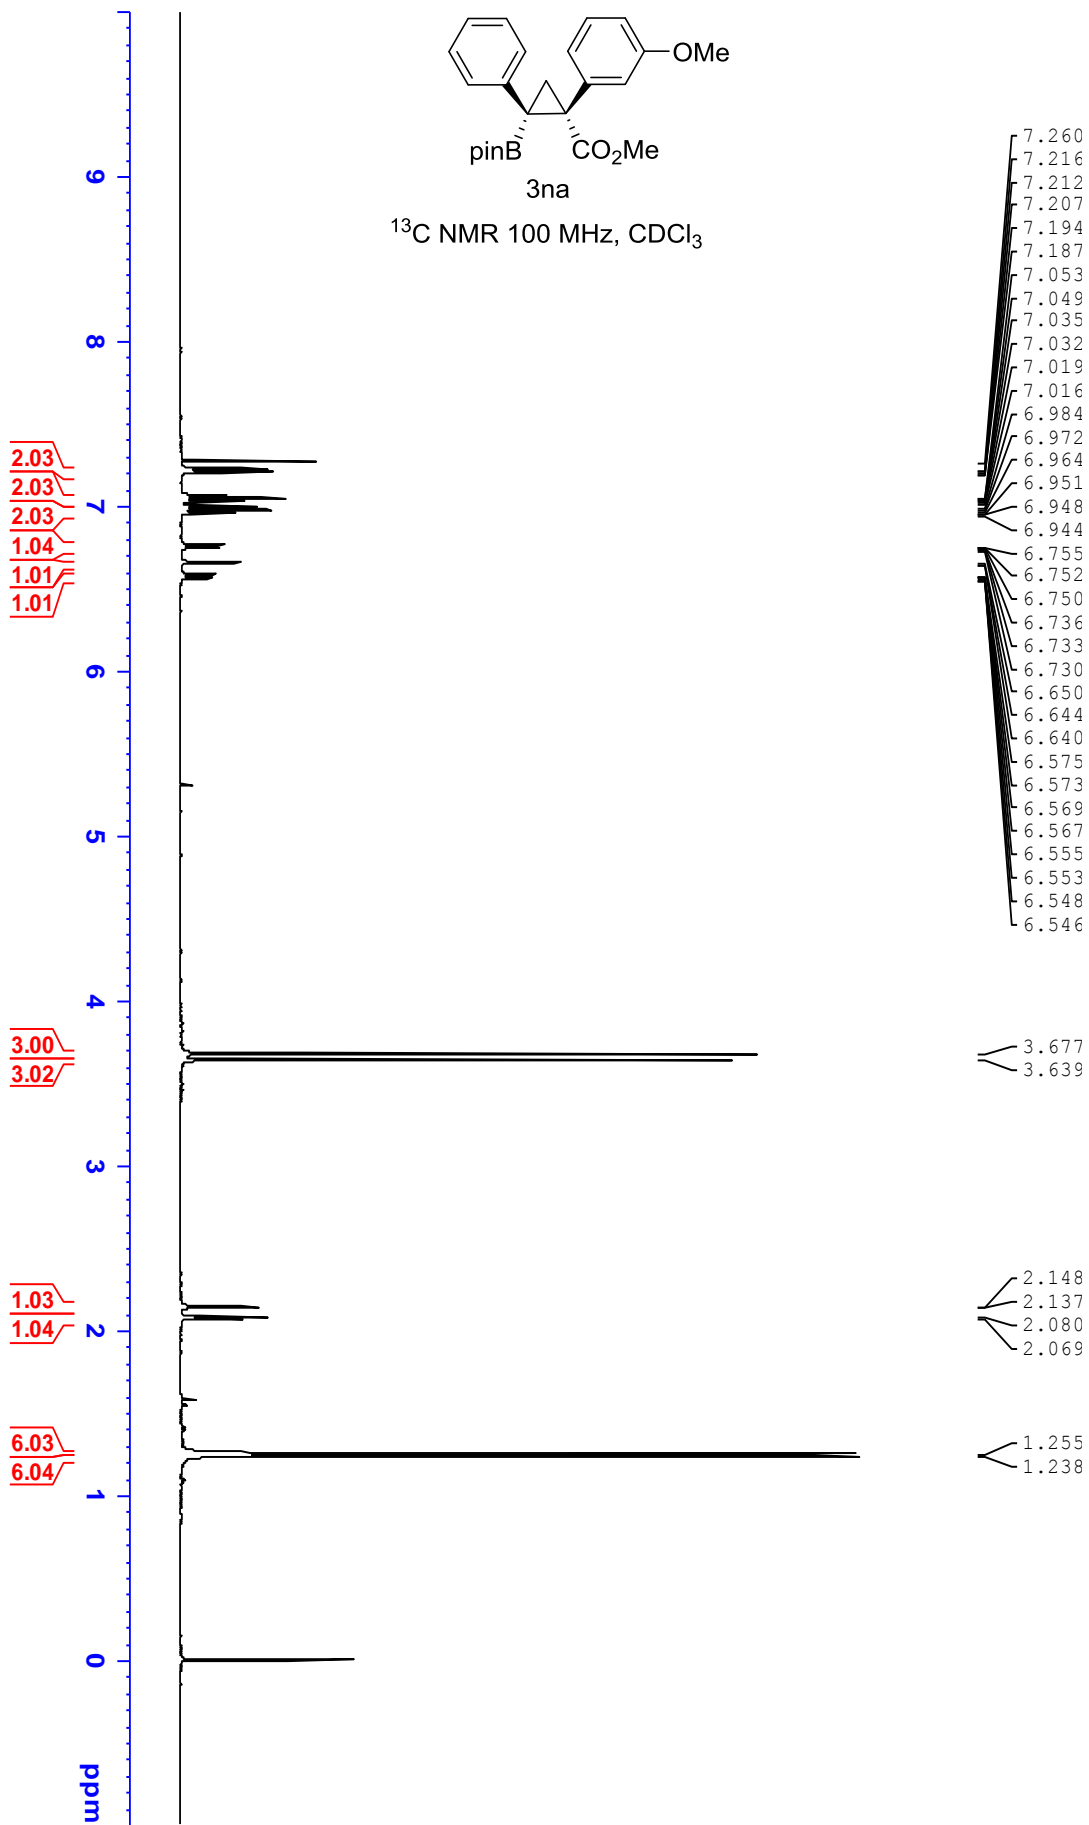

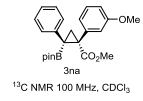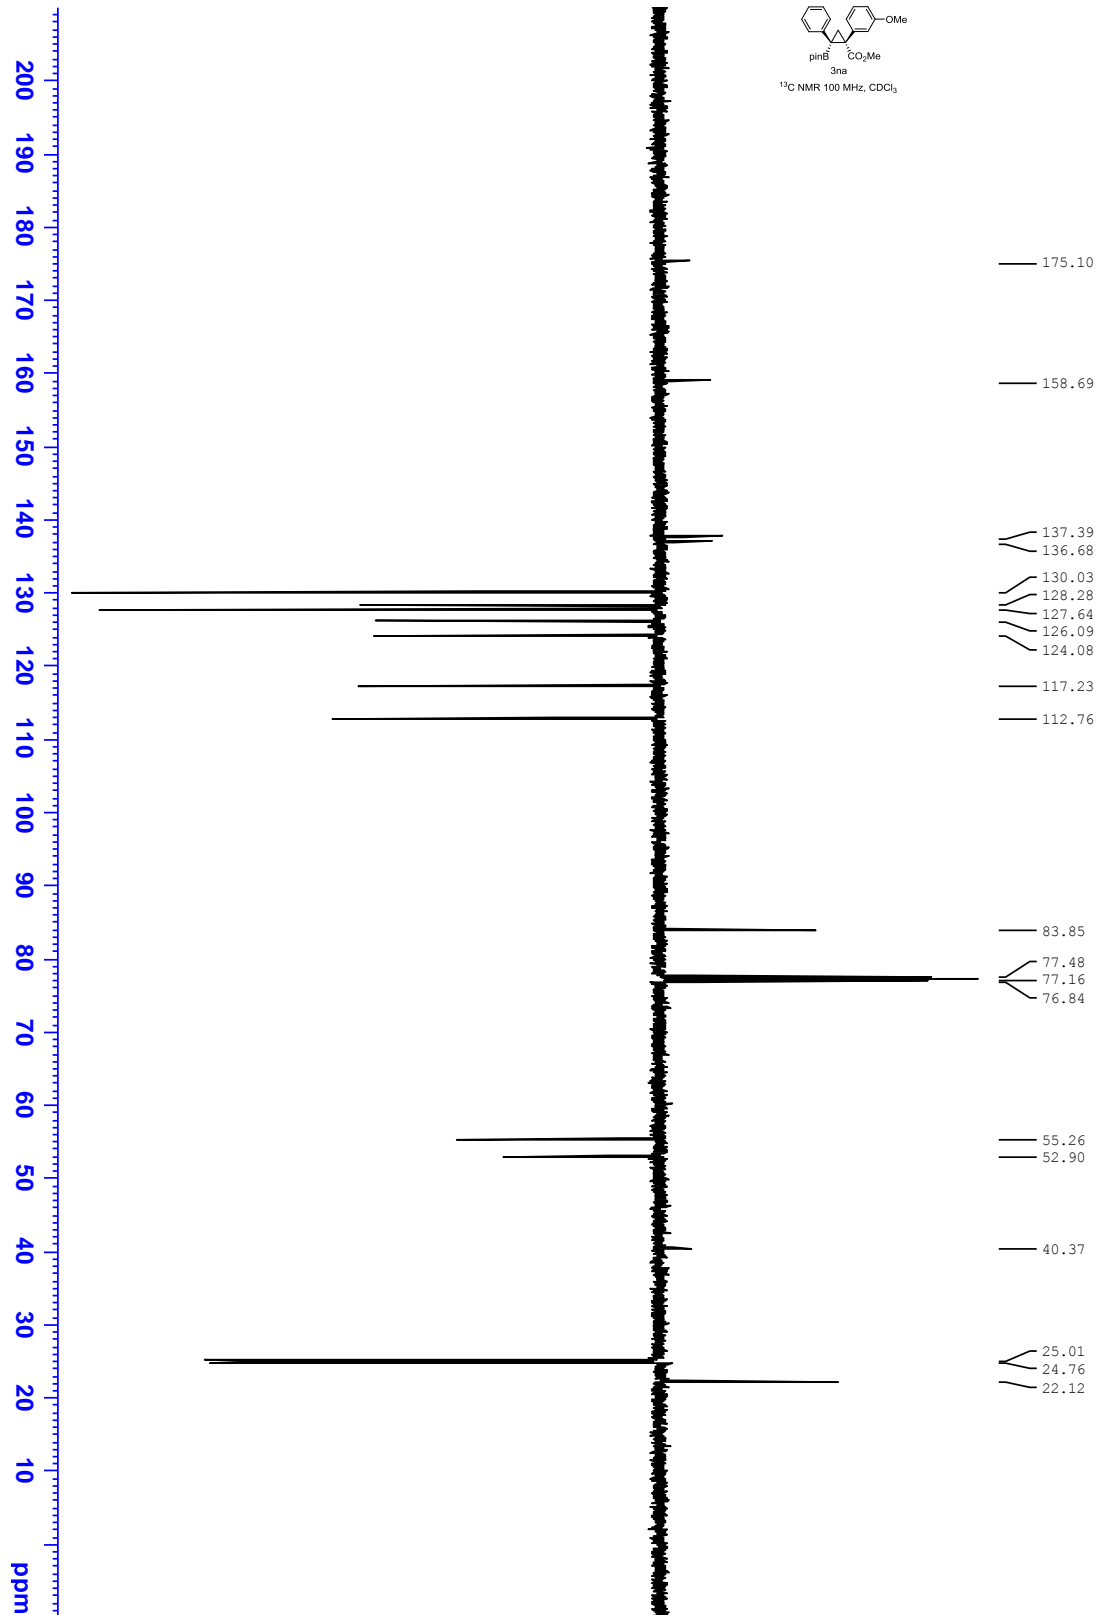



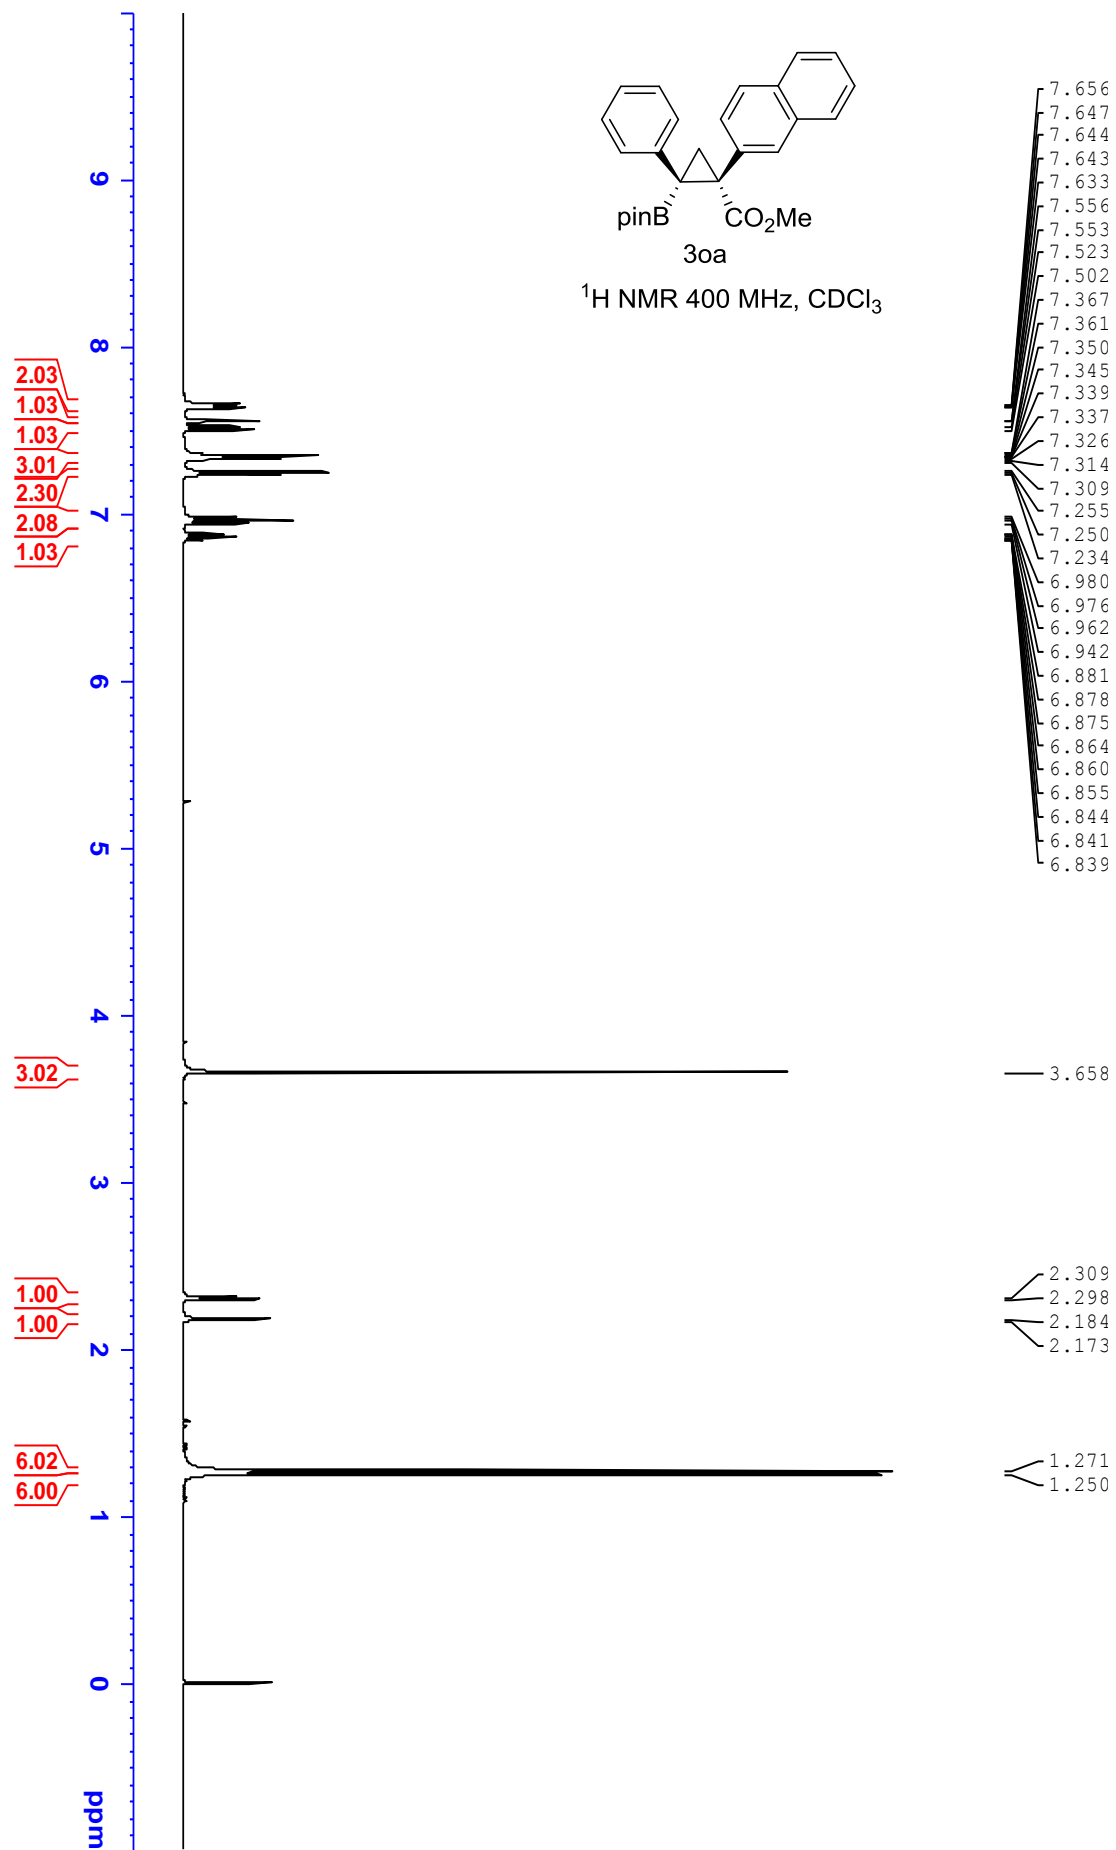

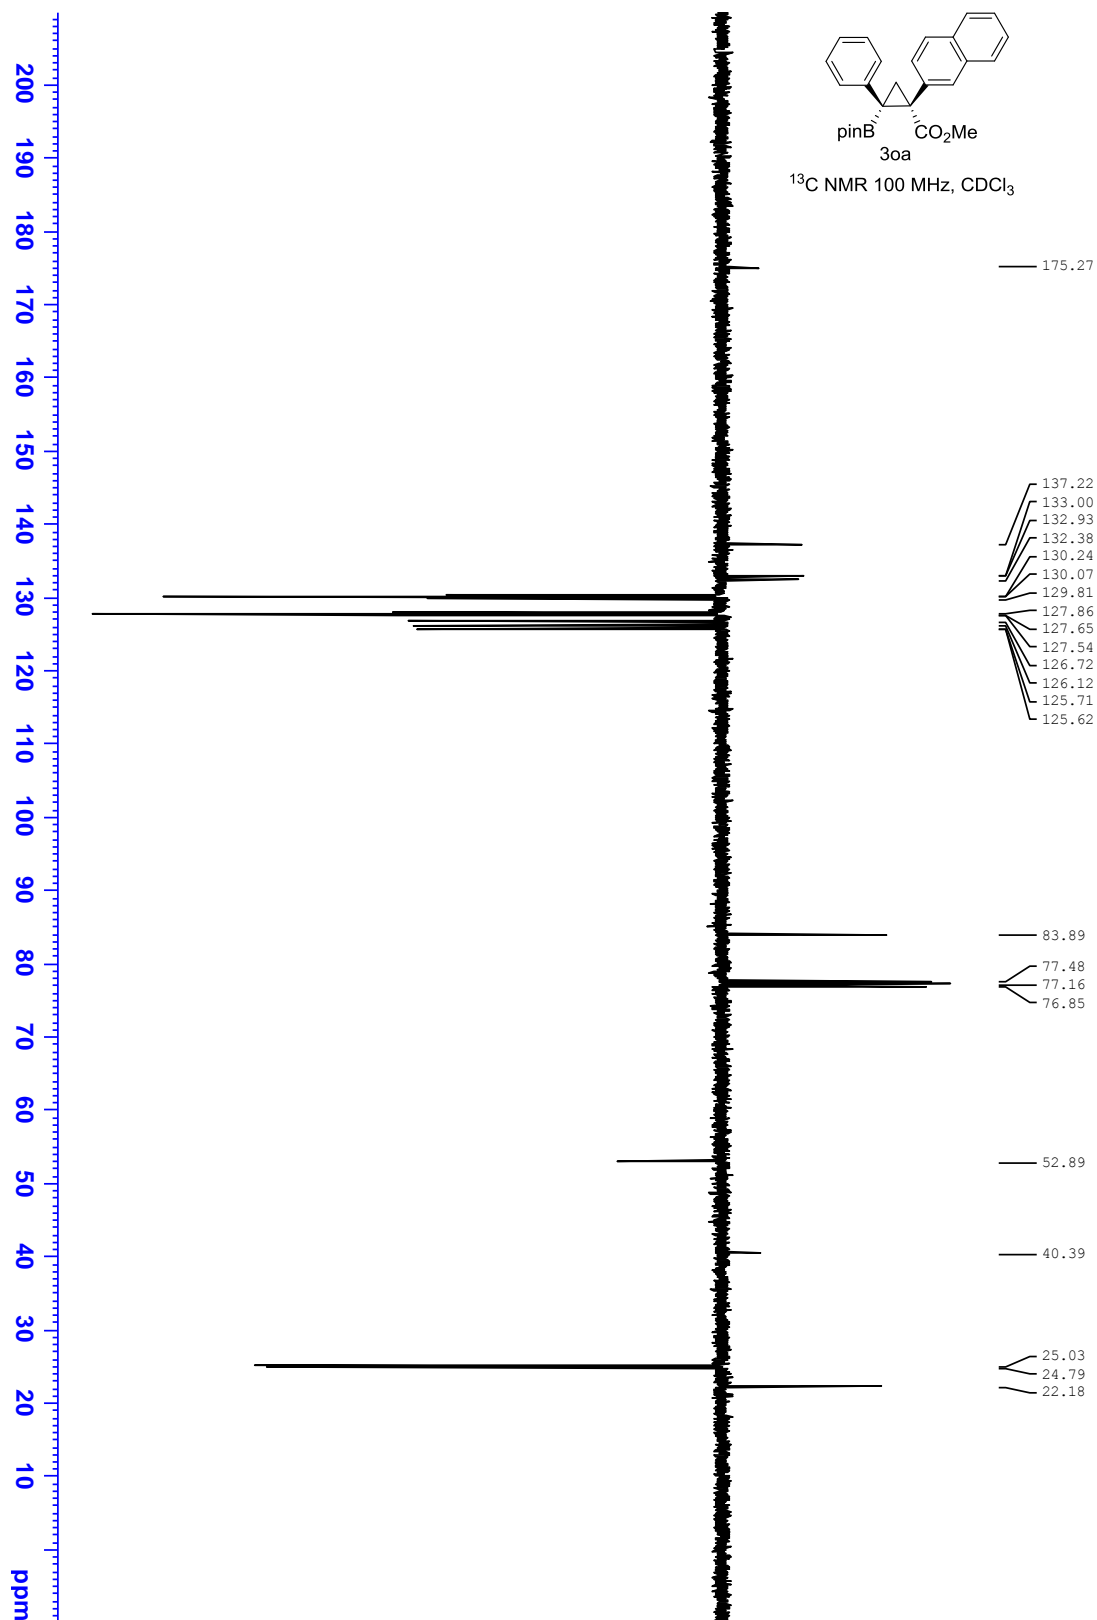

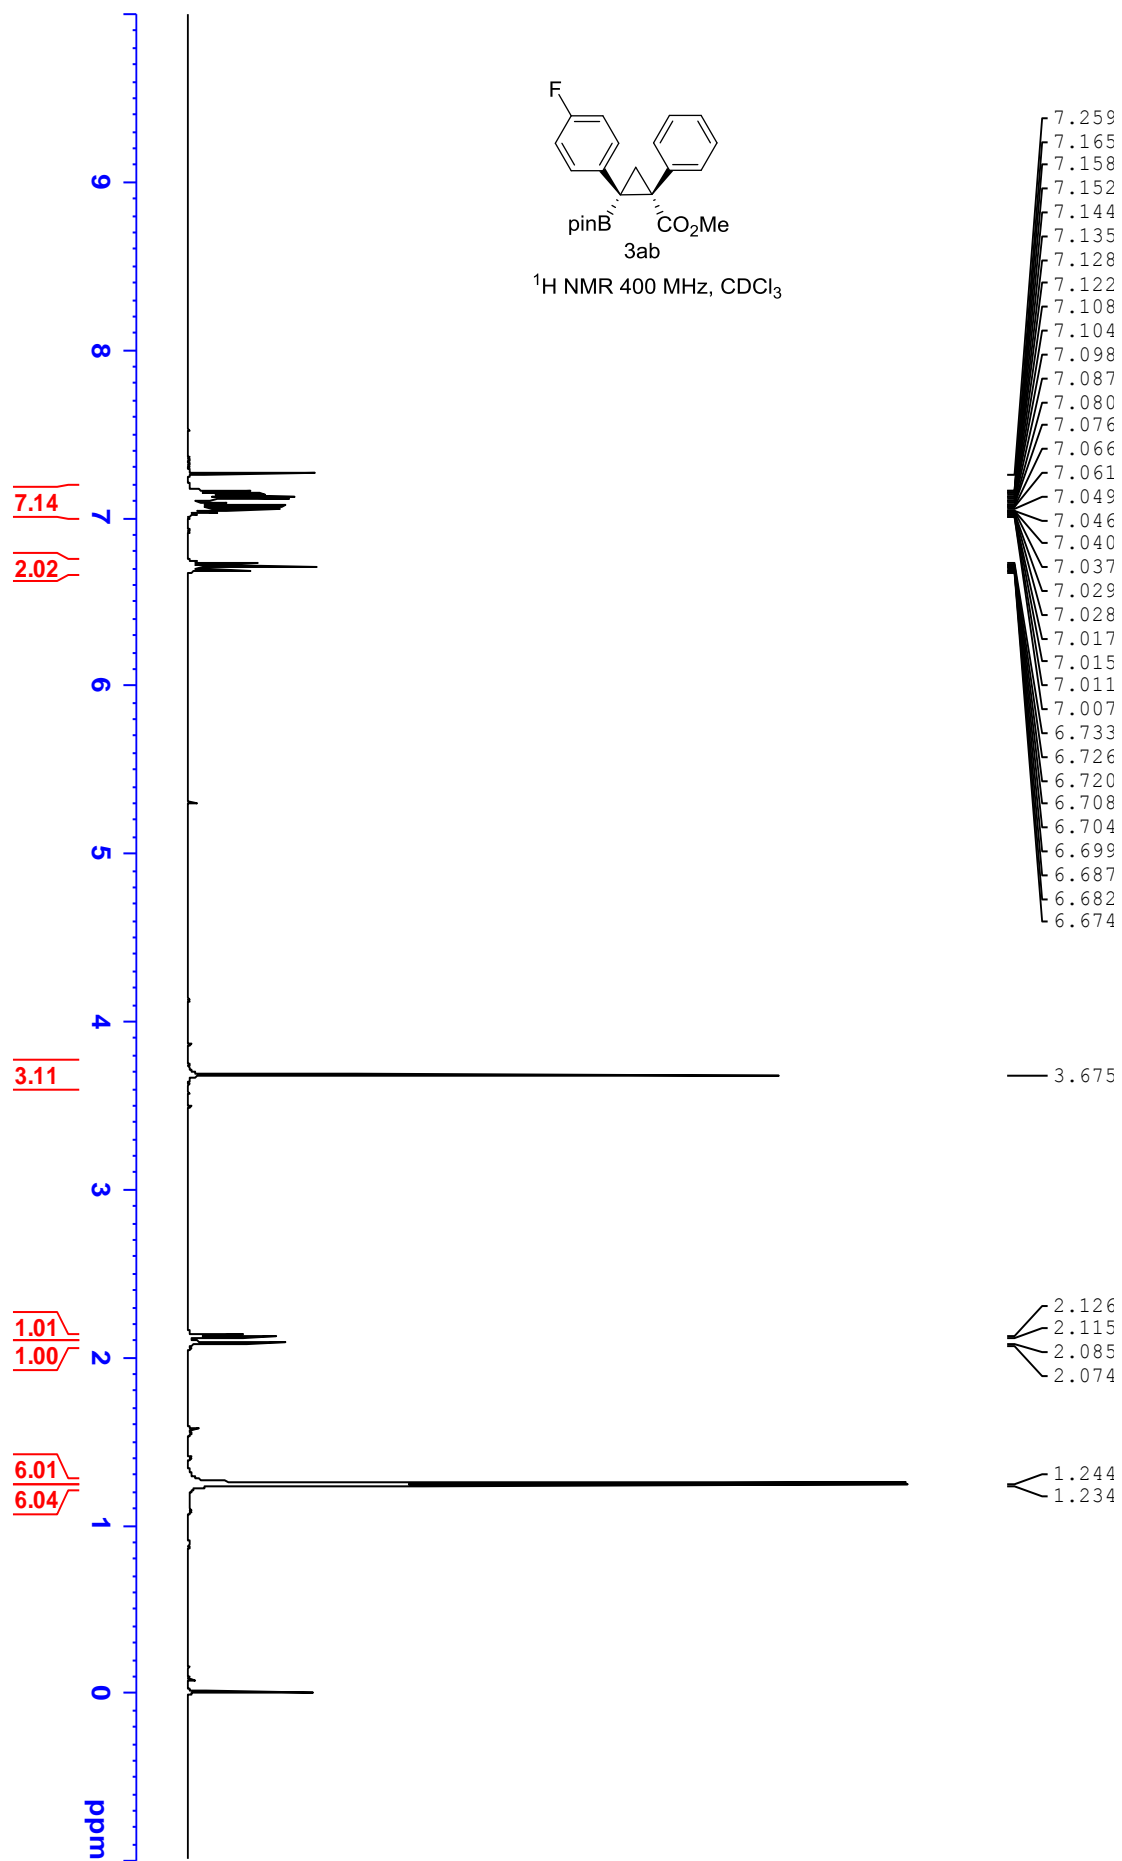

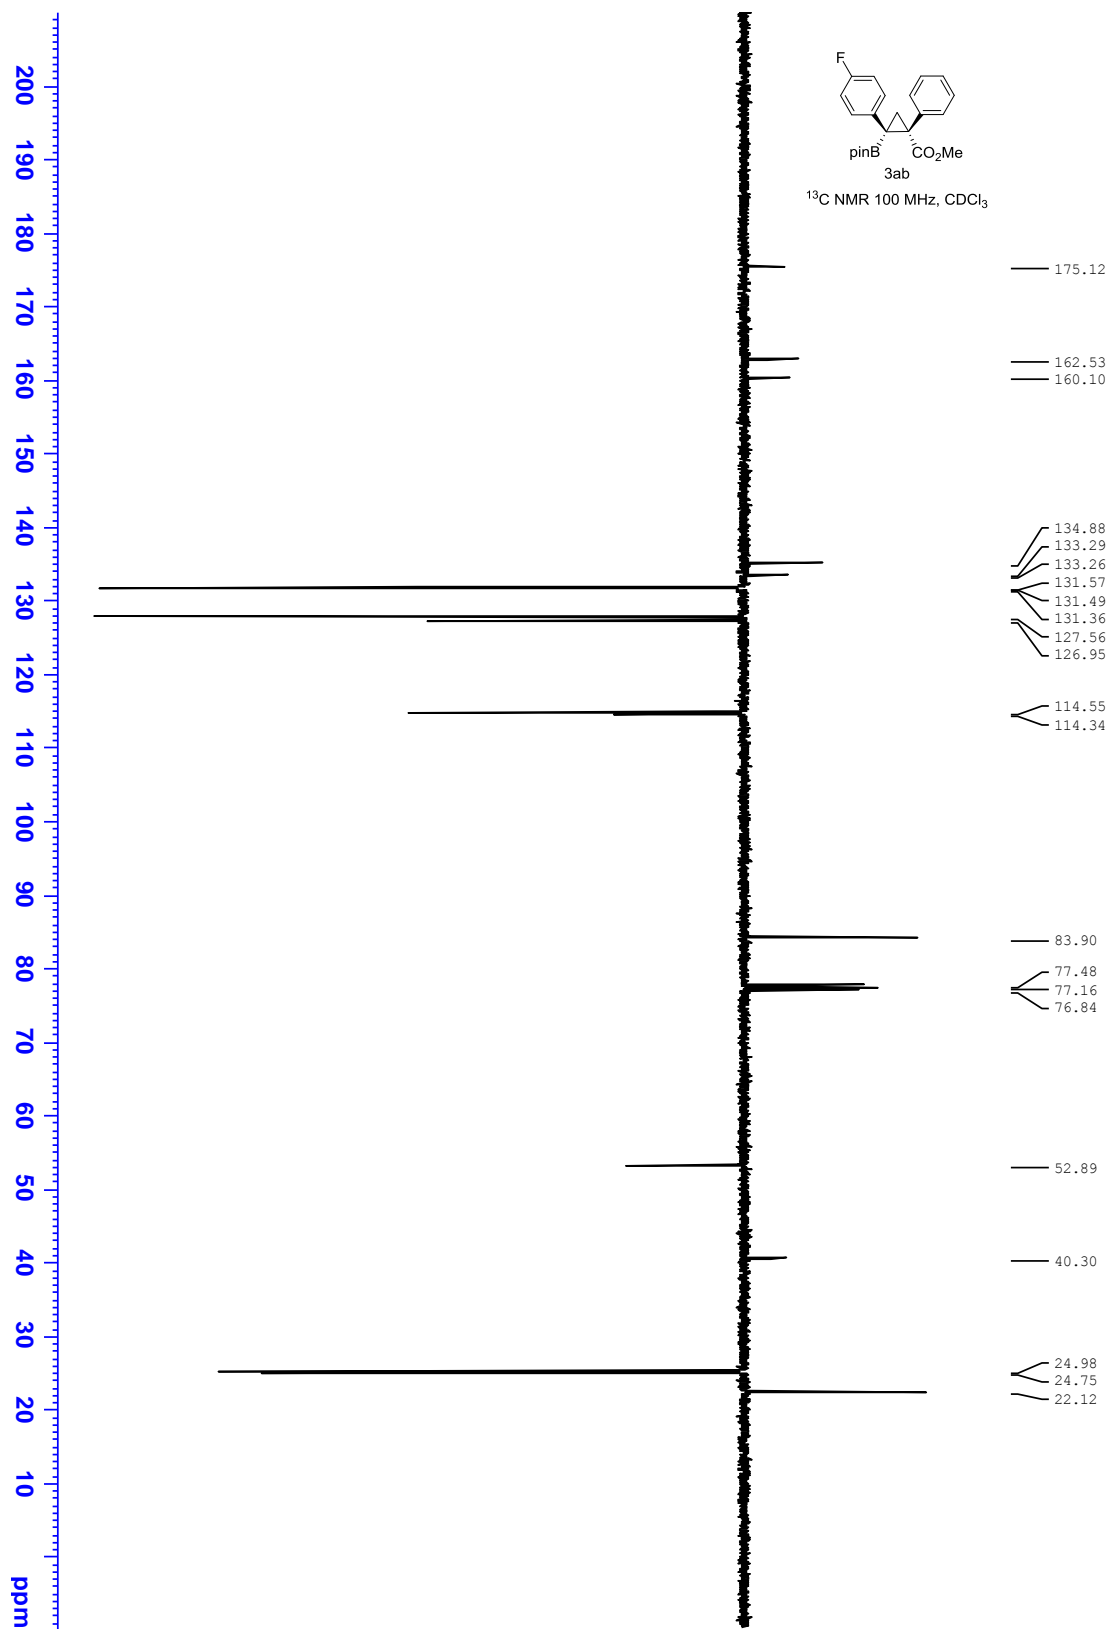

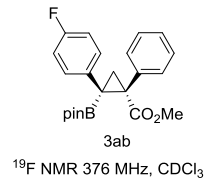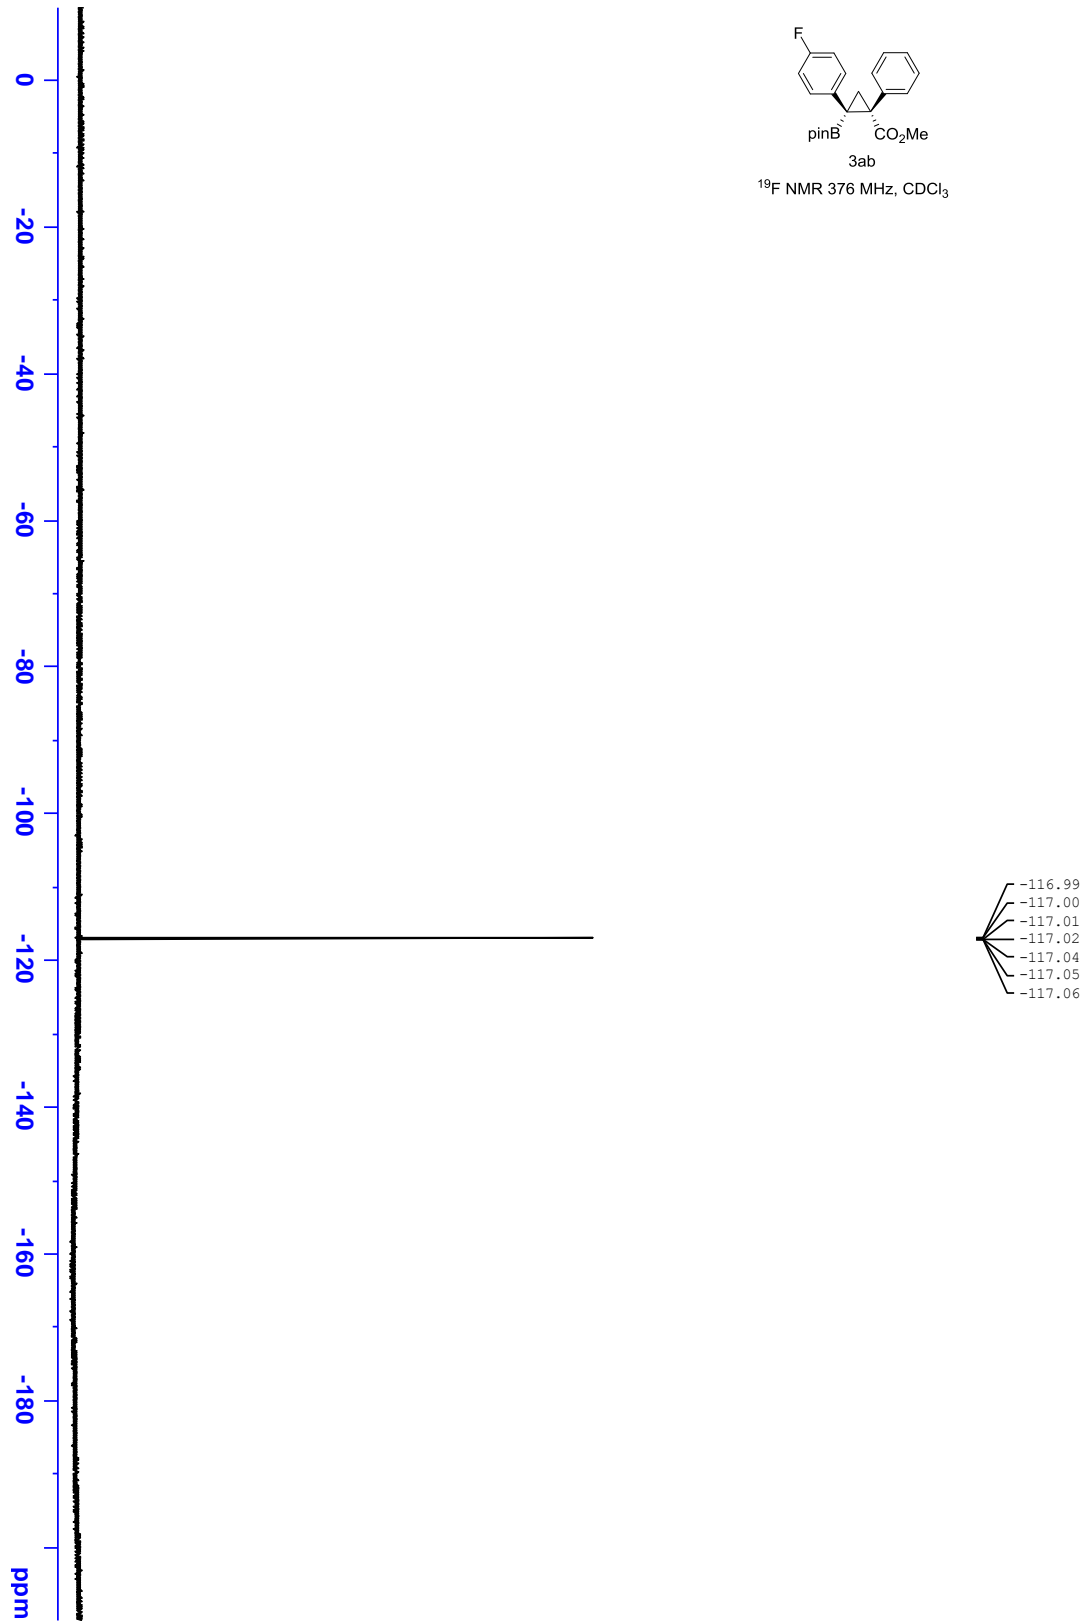

**3ab**  $^{11}\text{B}$  NMR (128 MHz,  $\text{CDCl}_3$ )

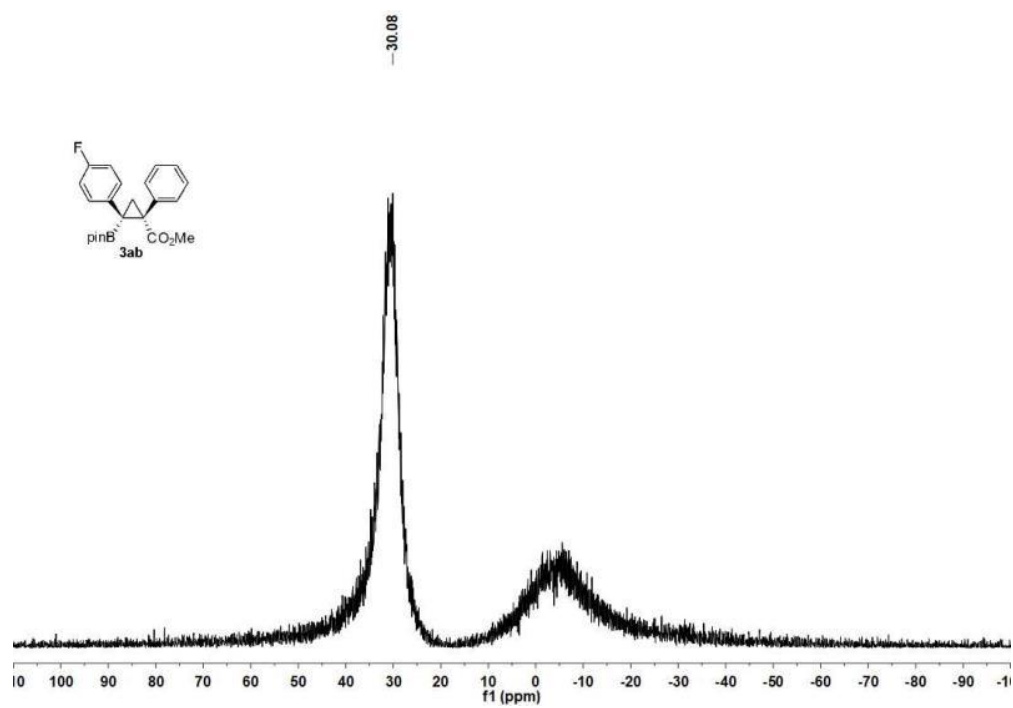

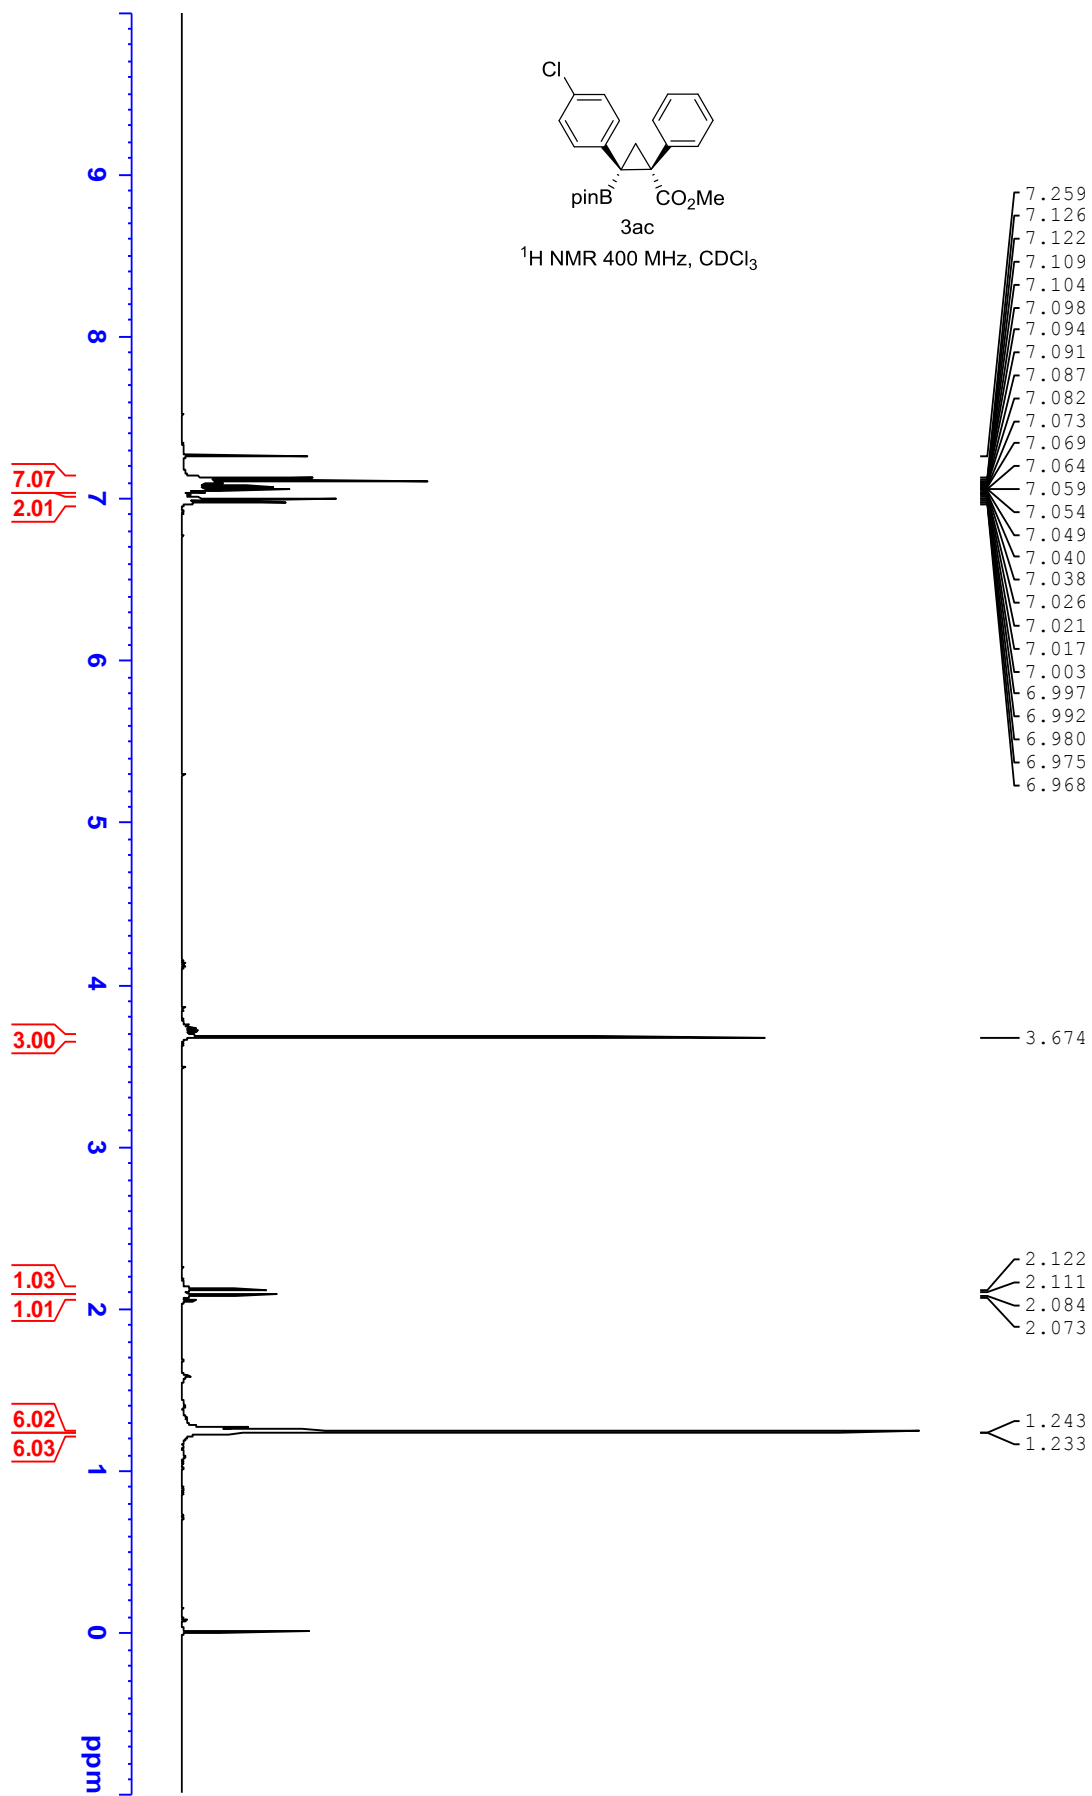

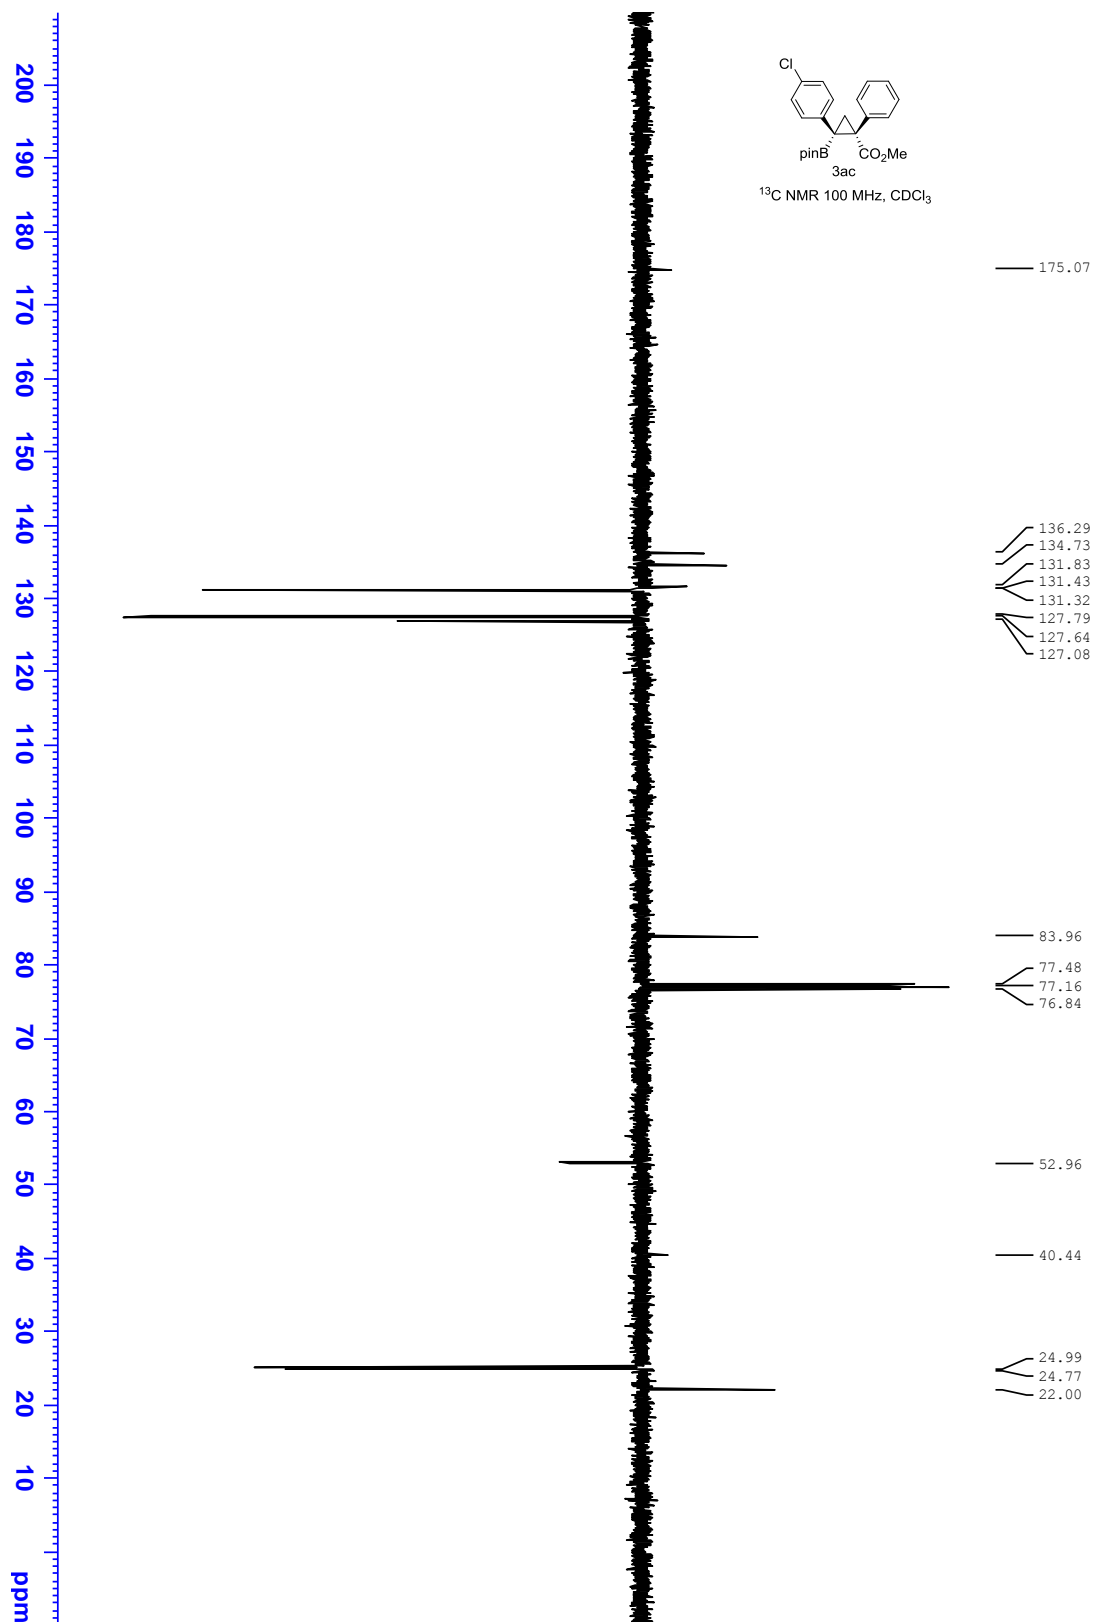



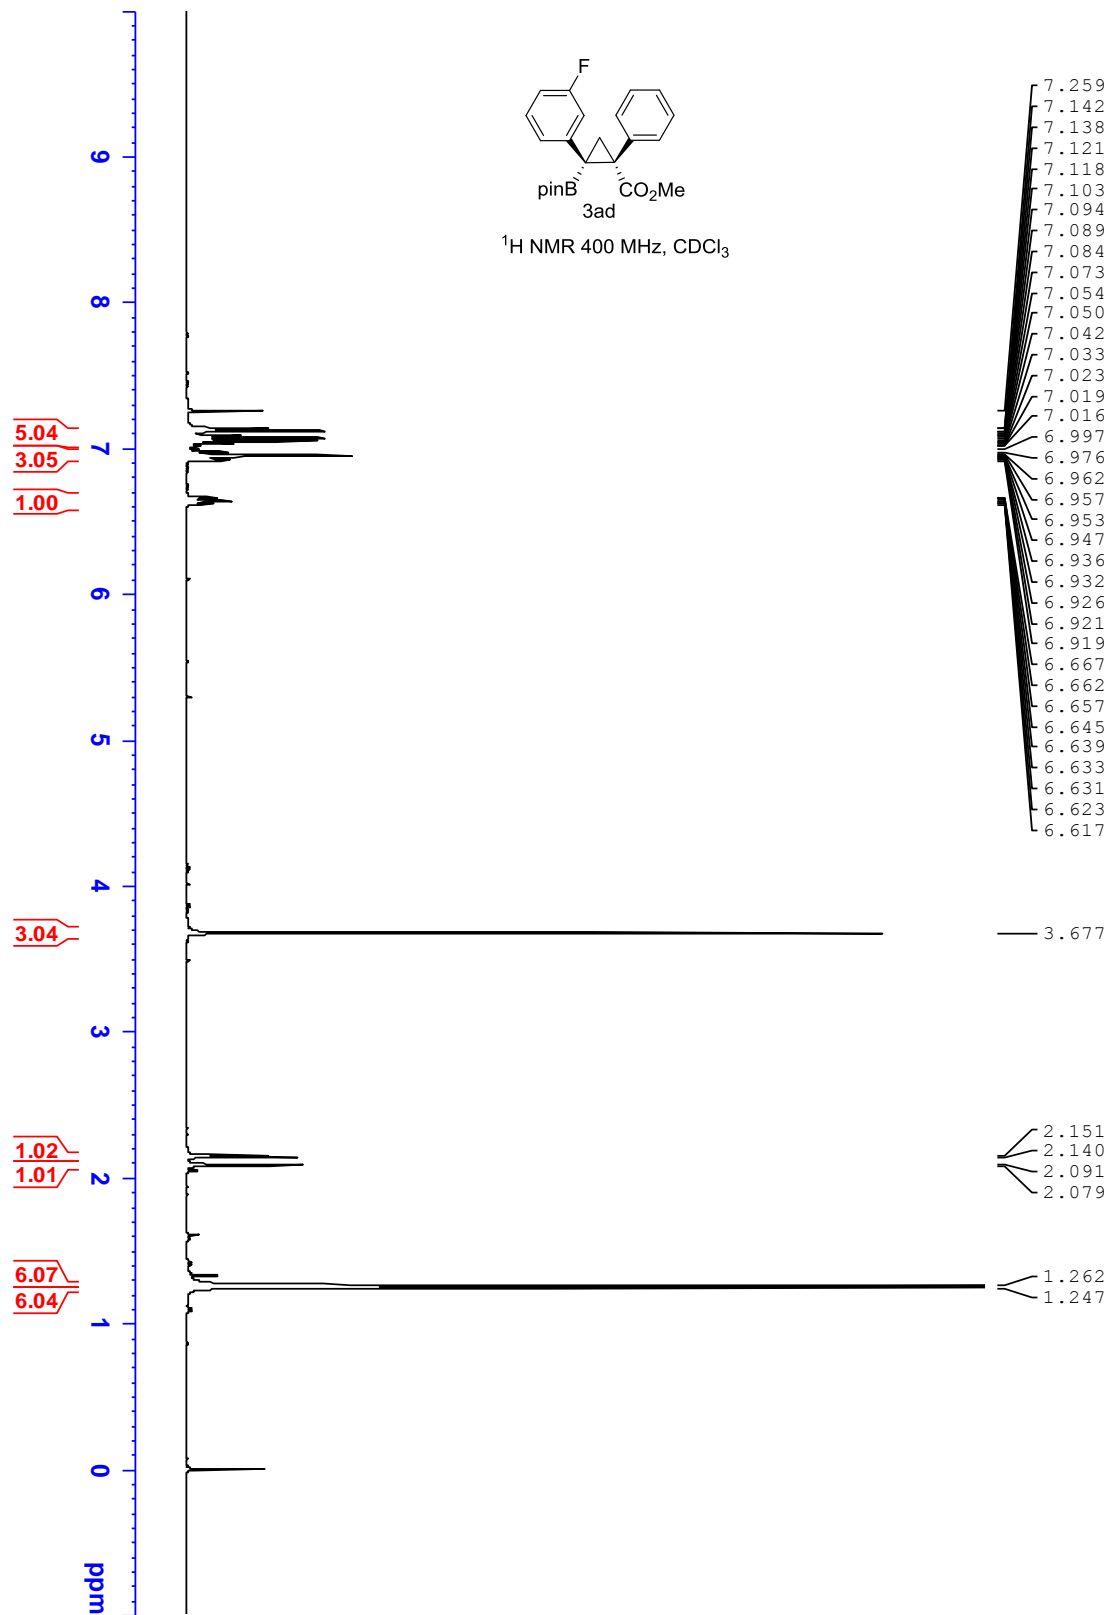

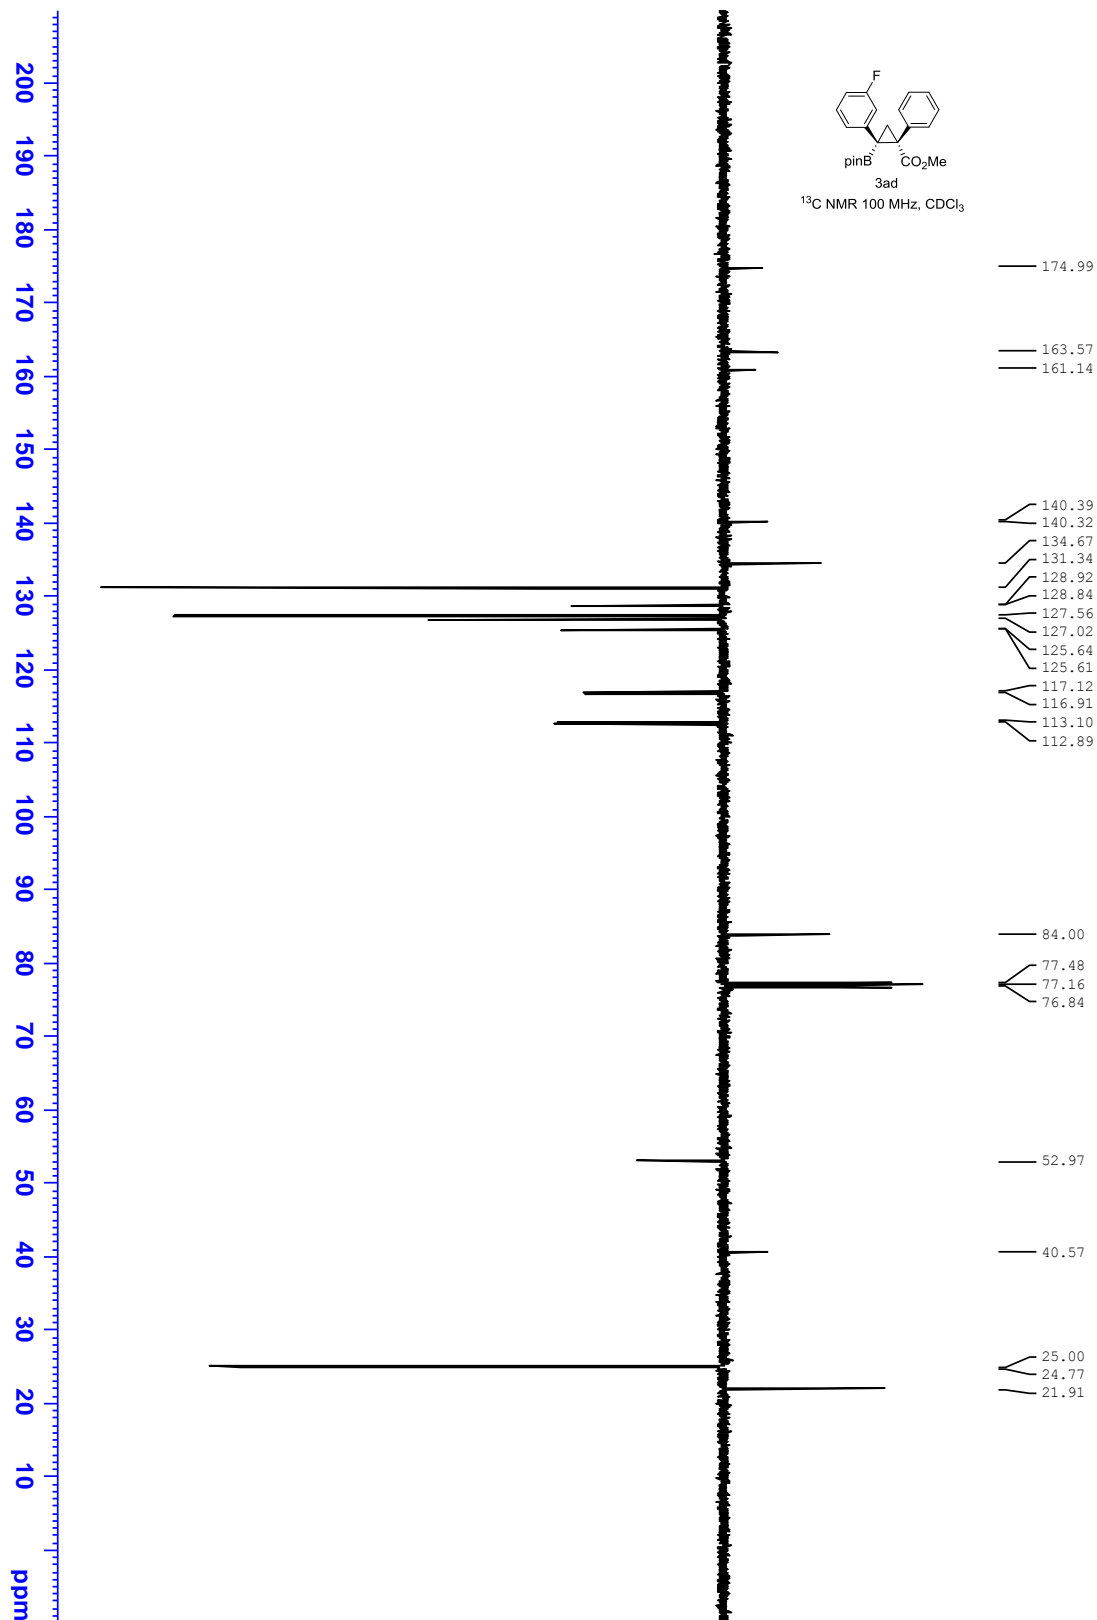

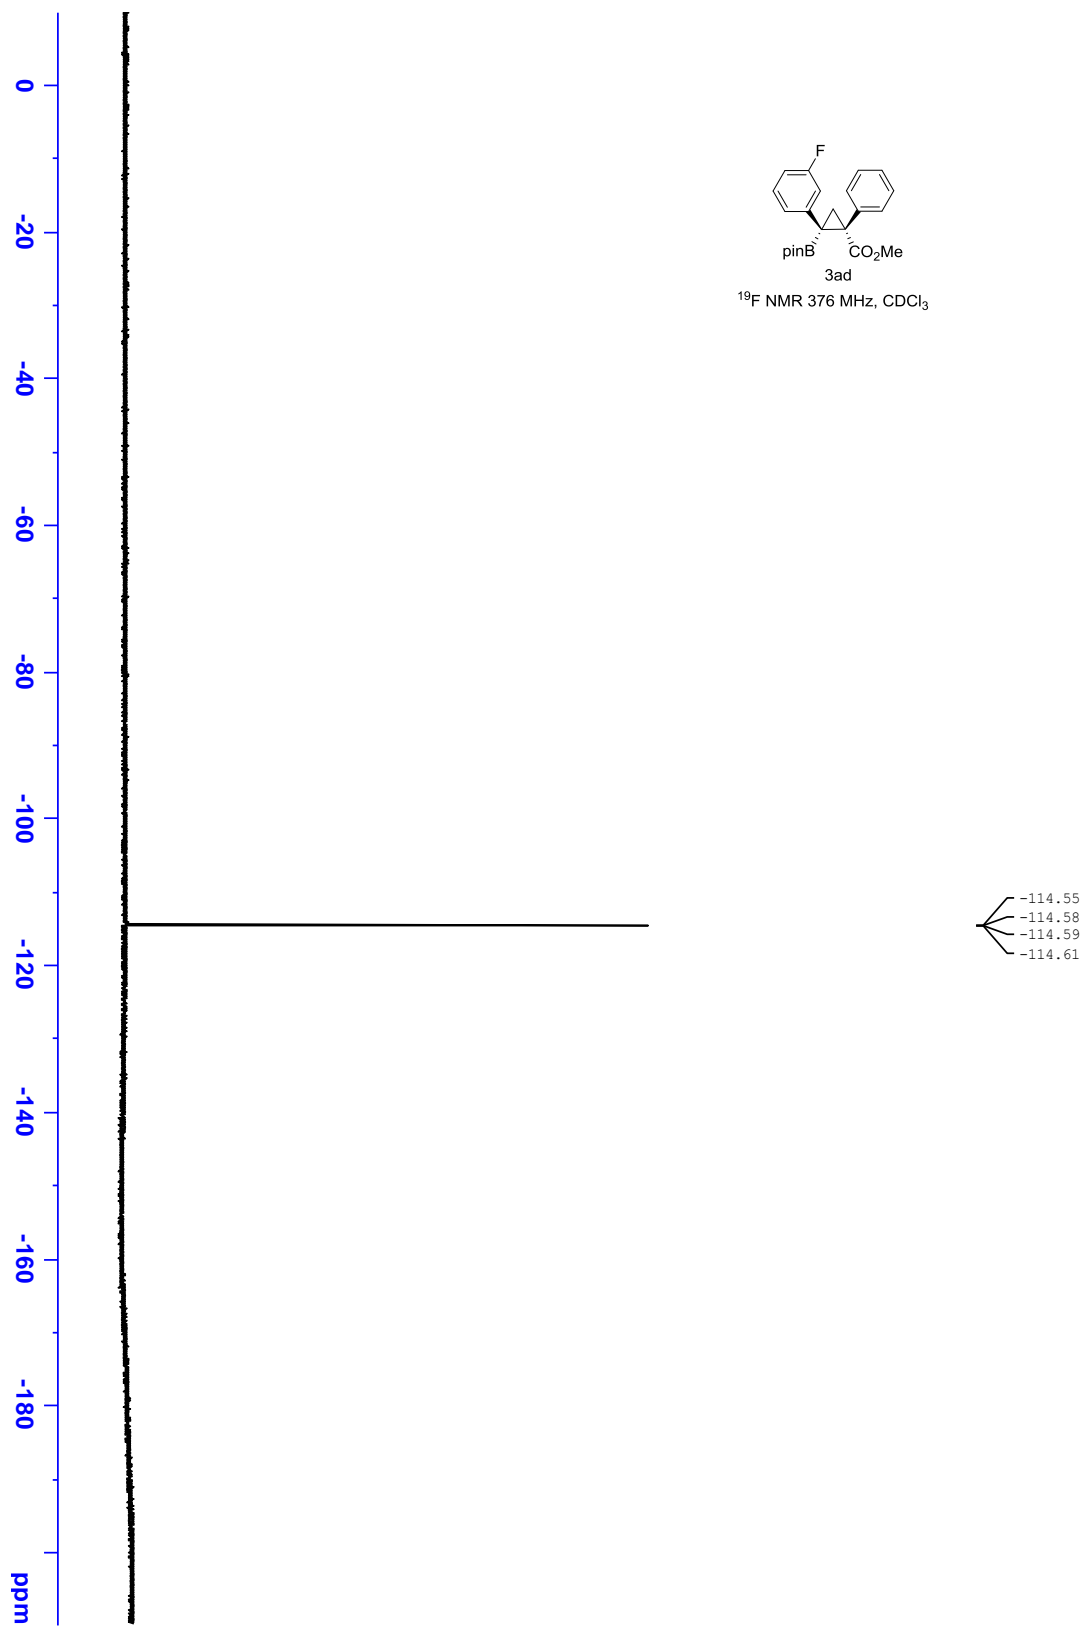

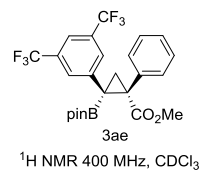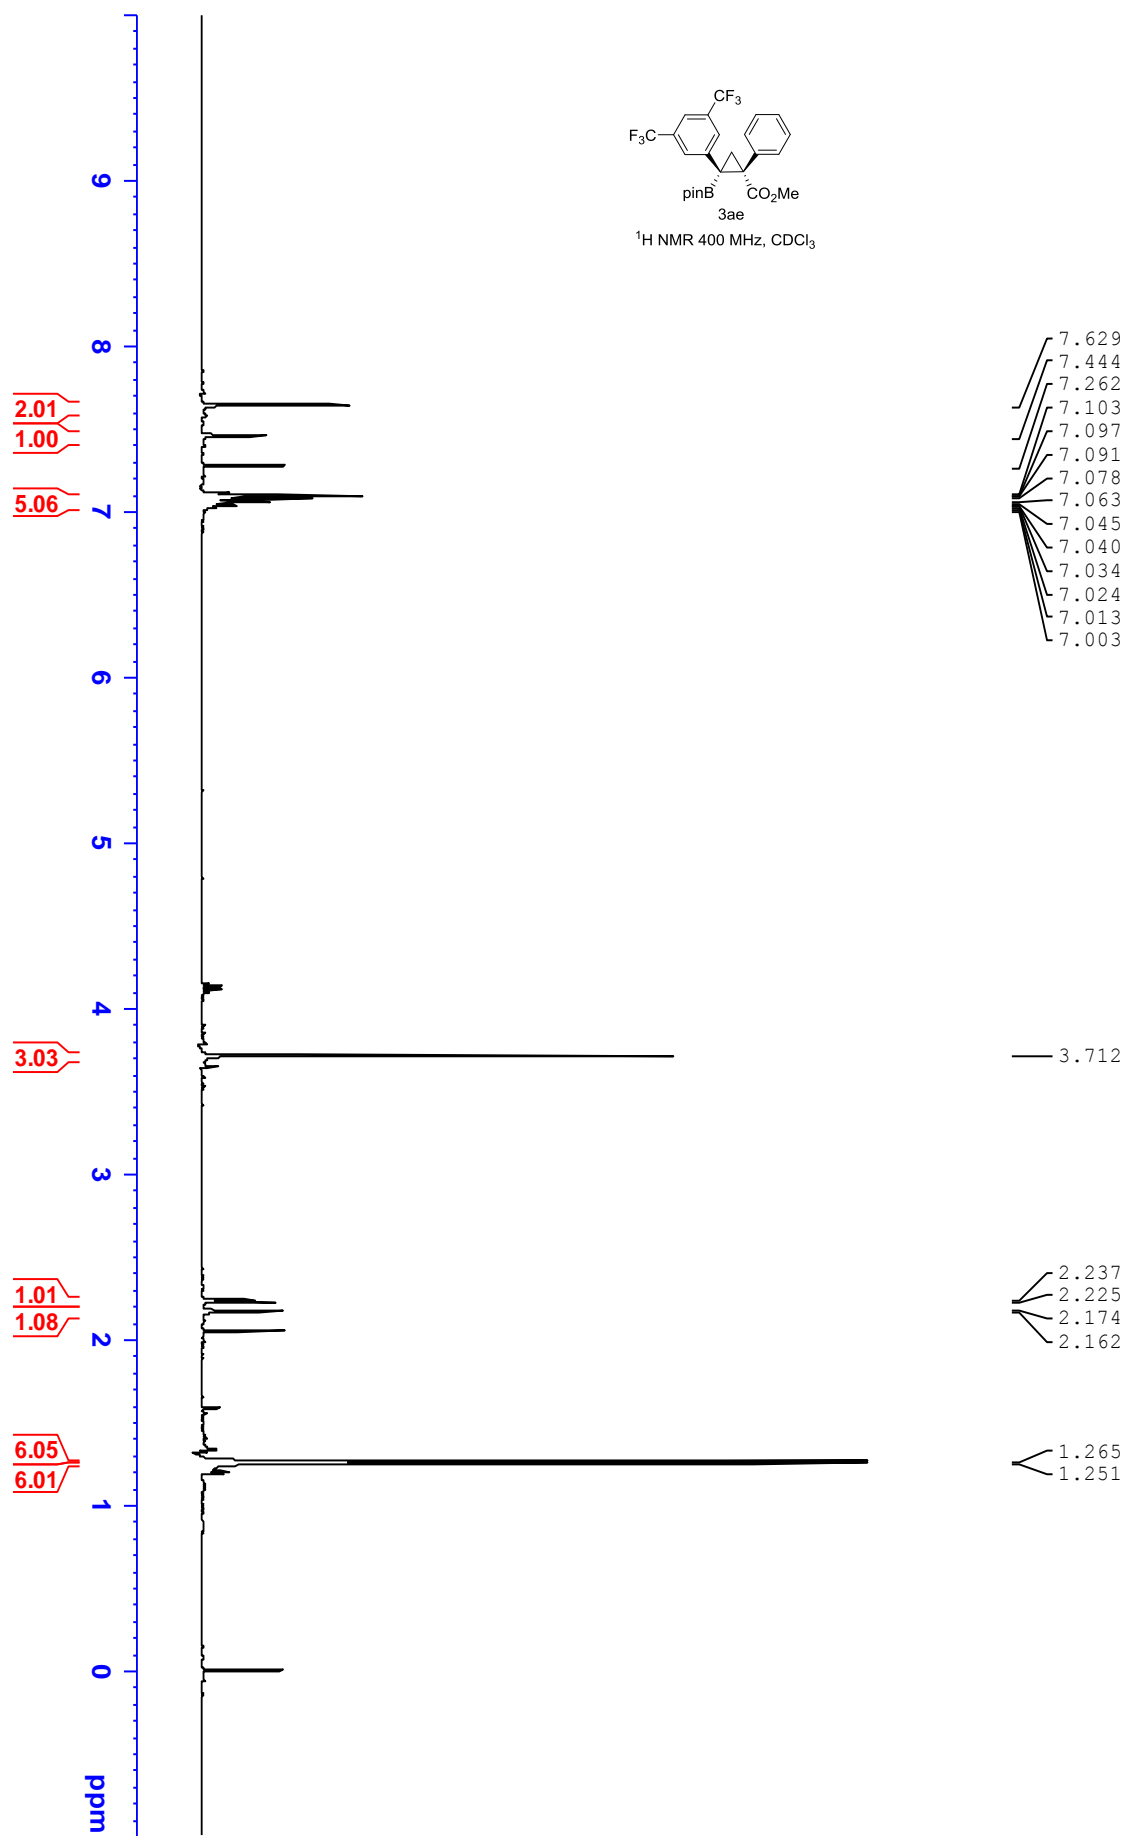

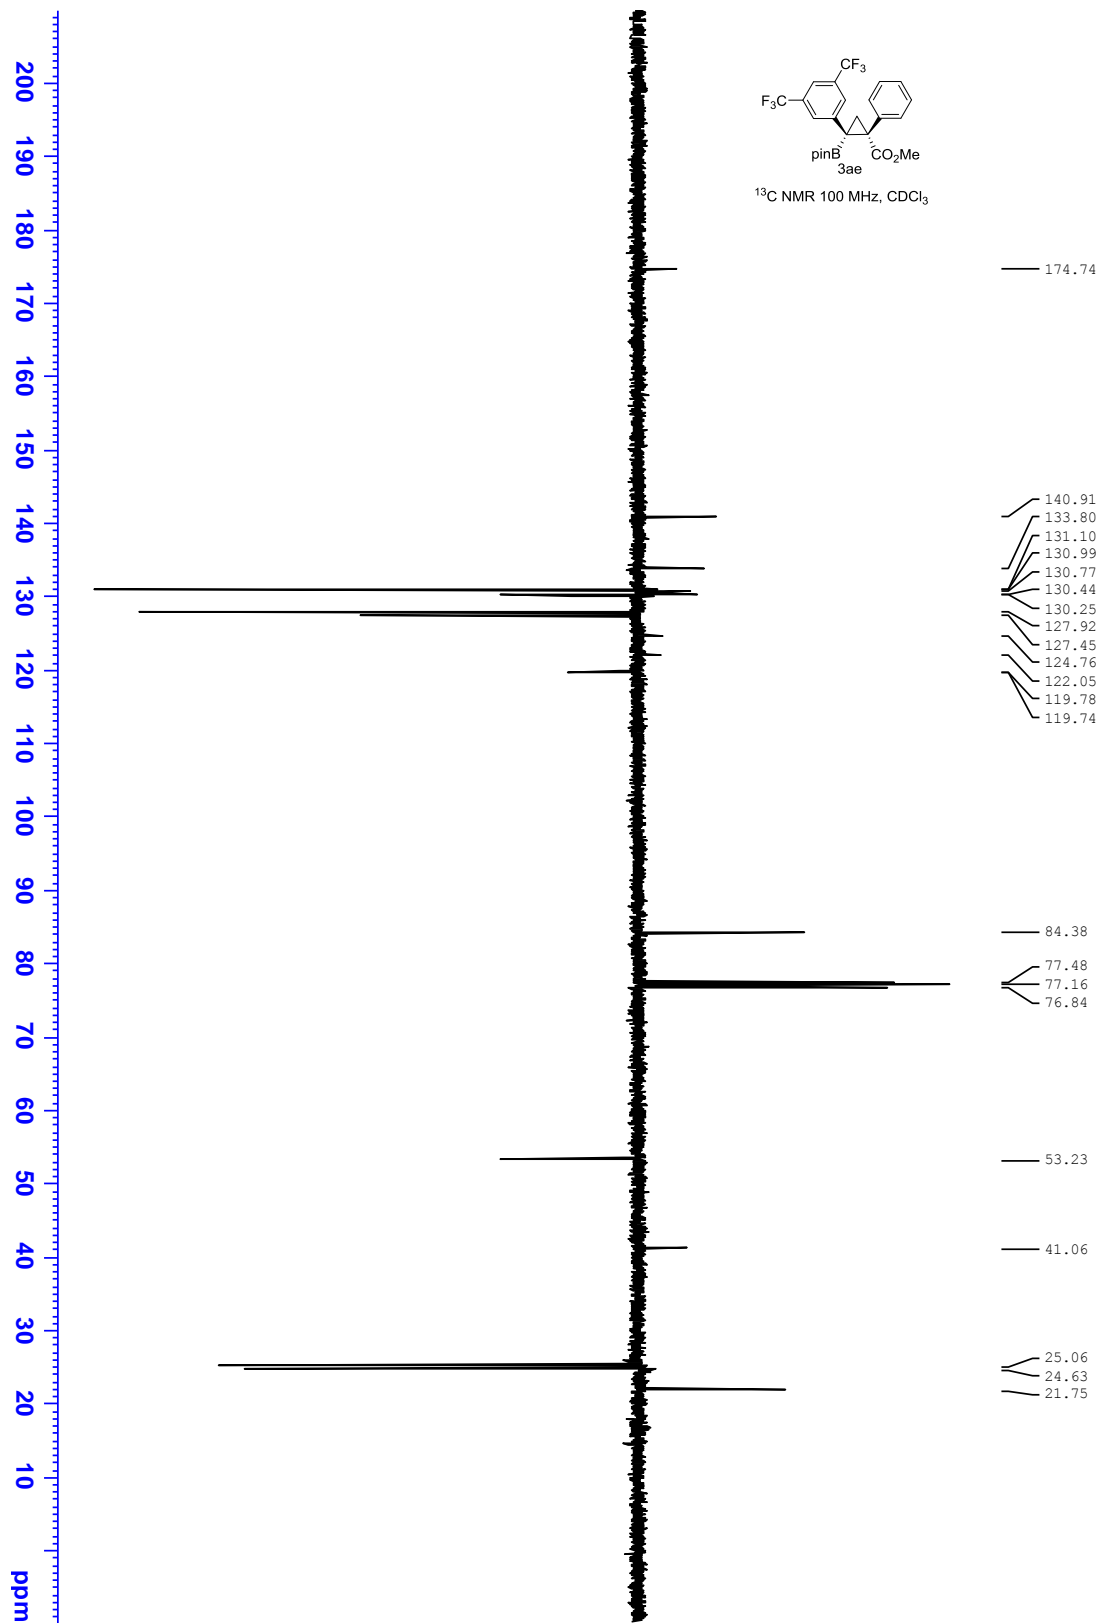

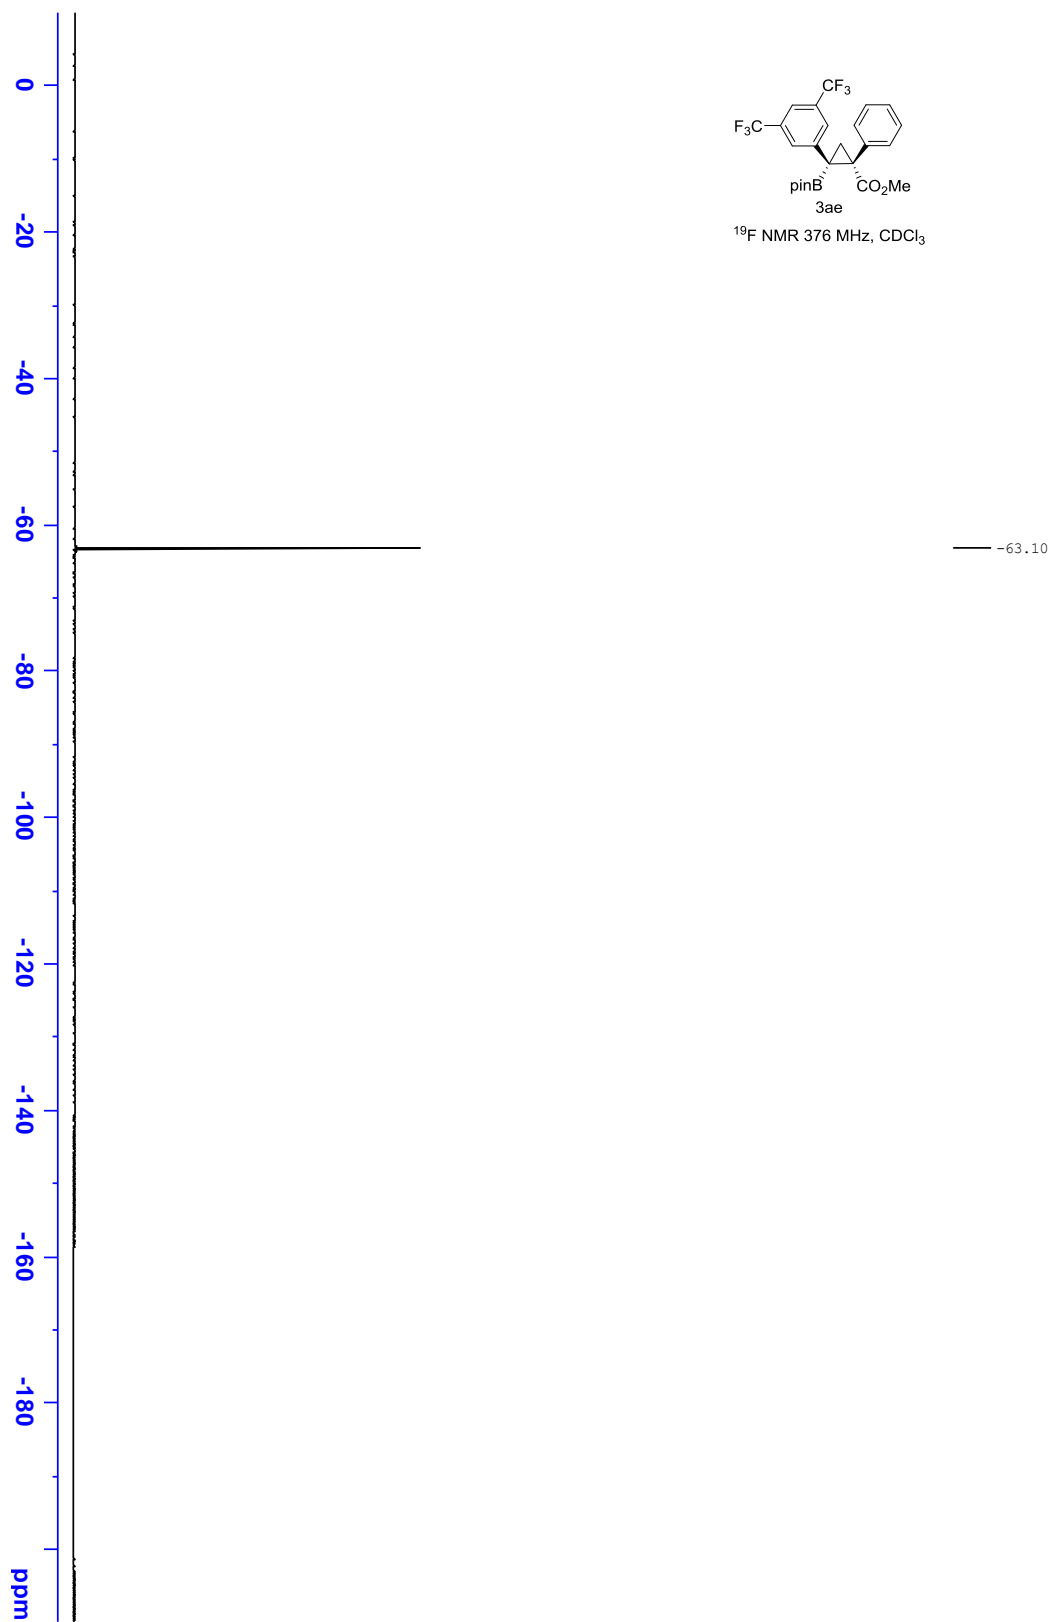

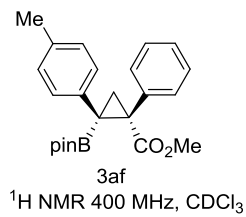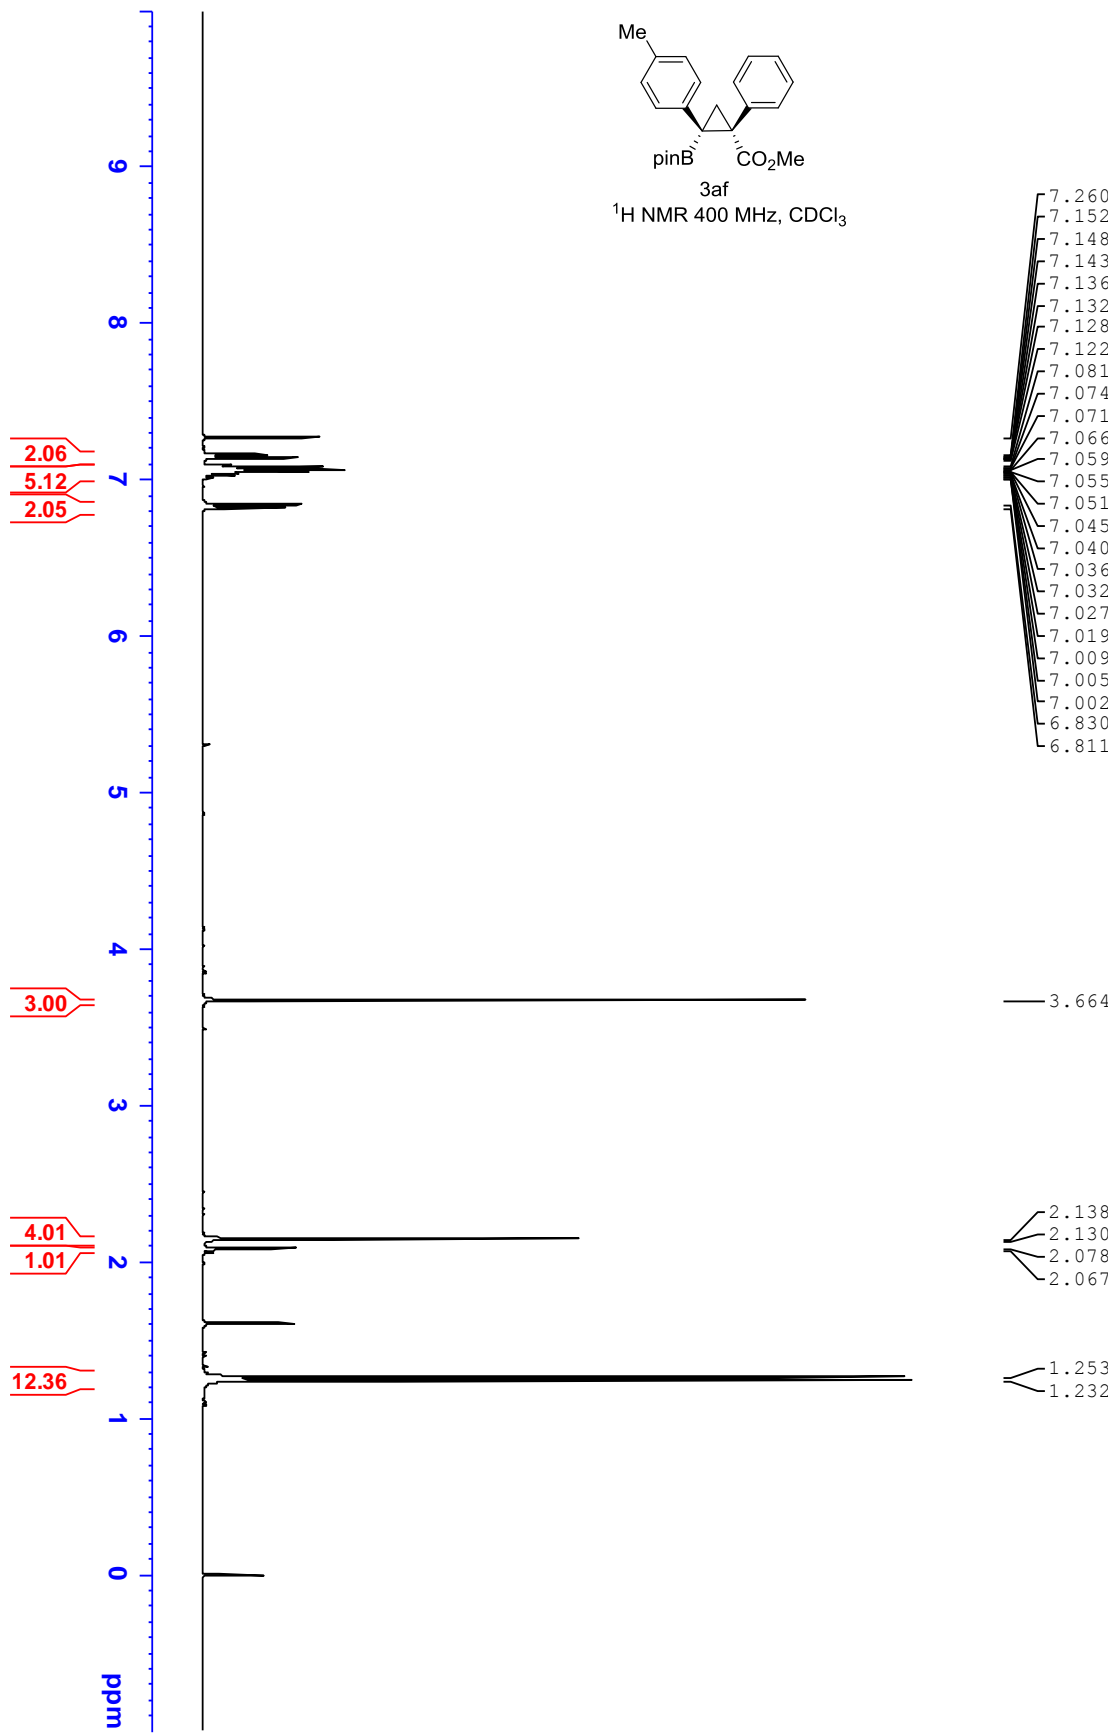

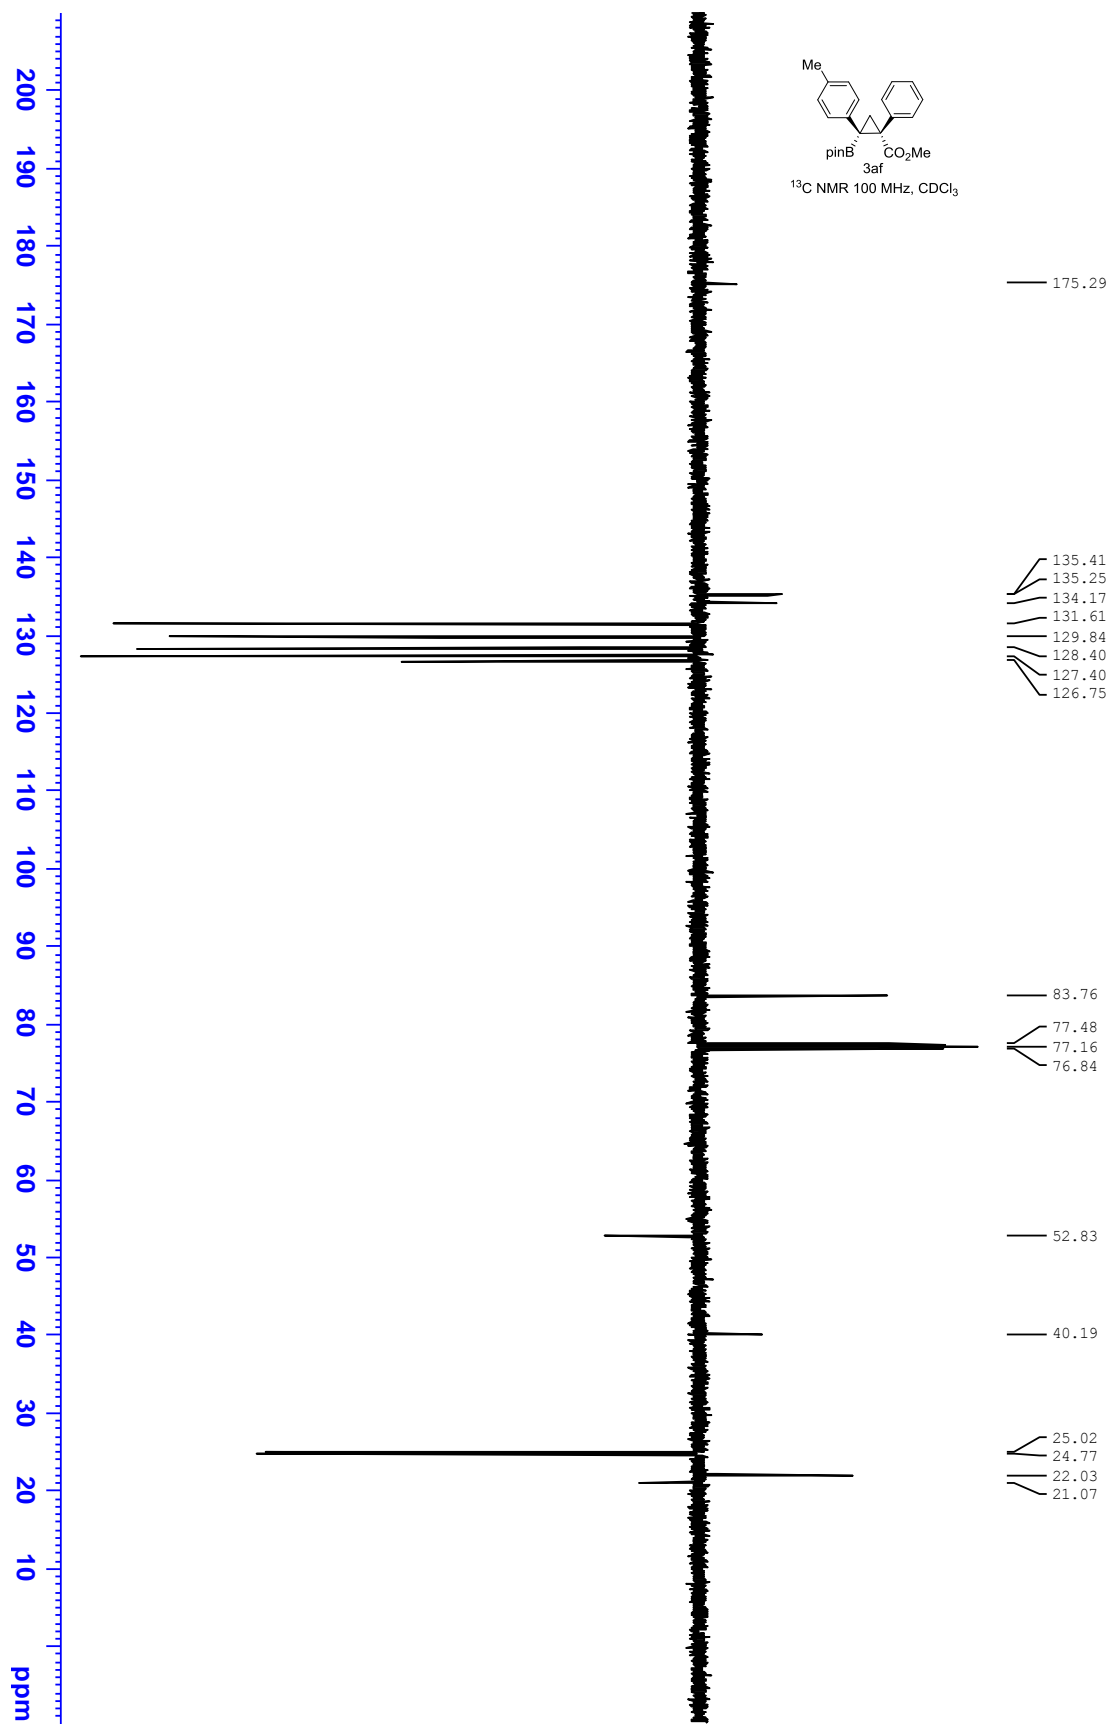



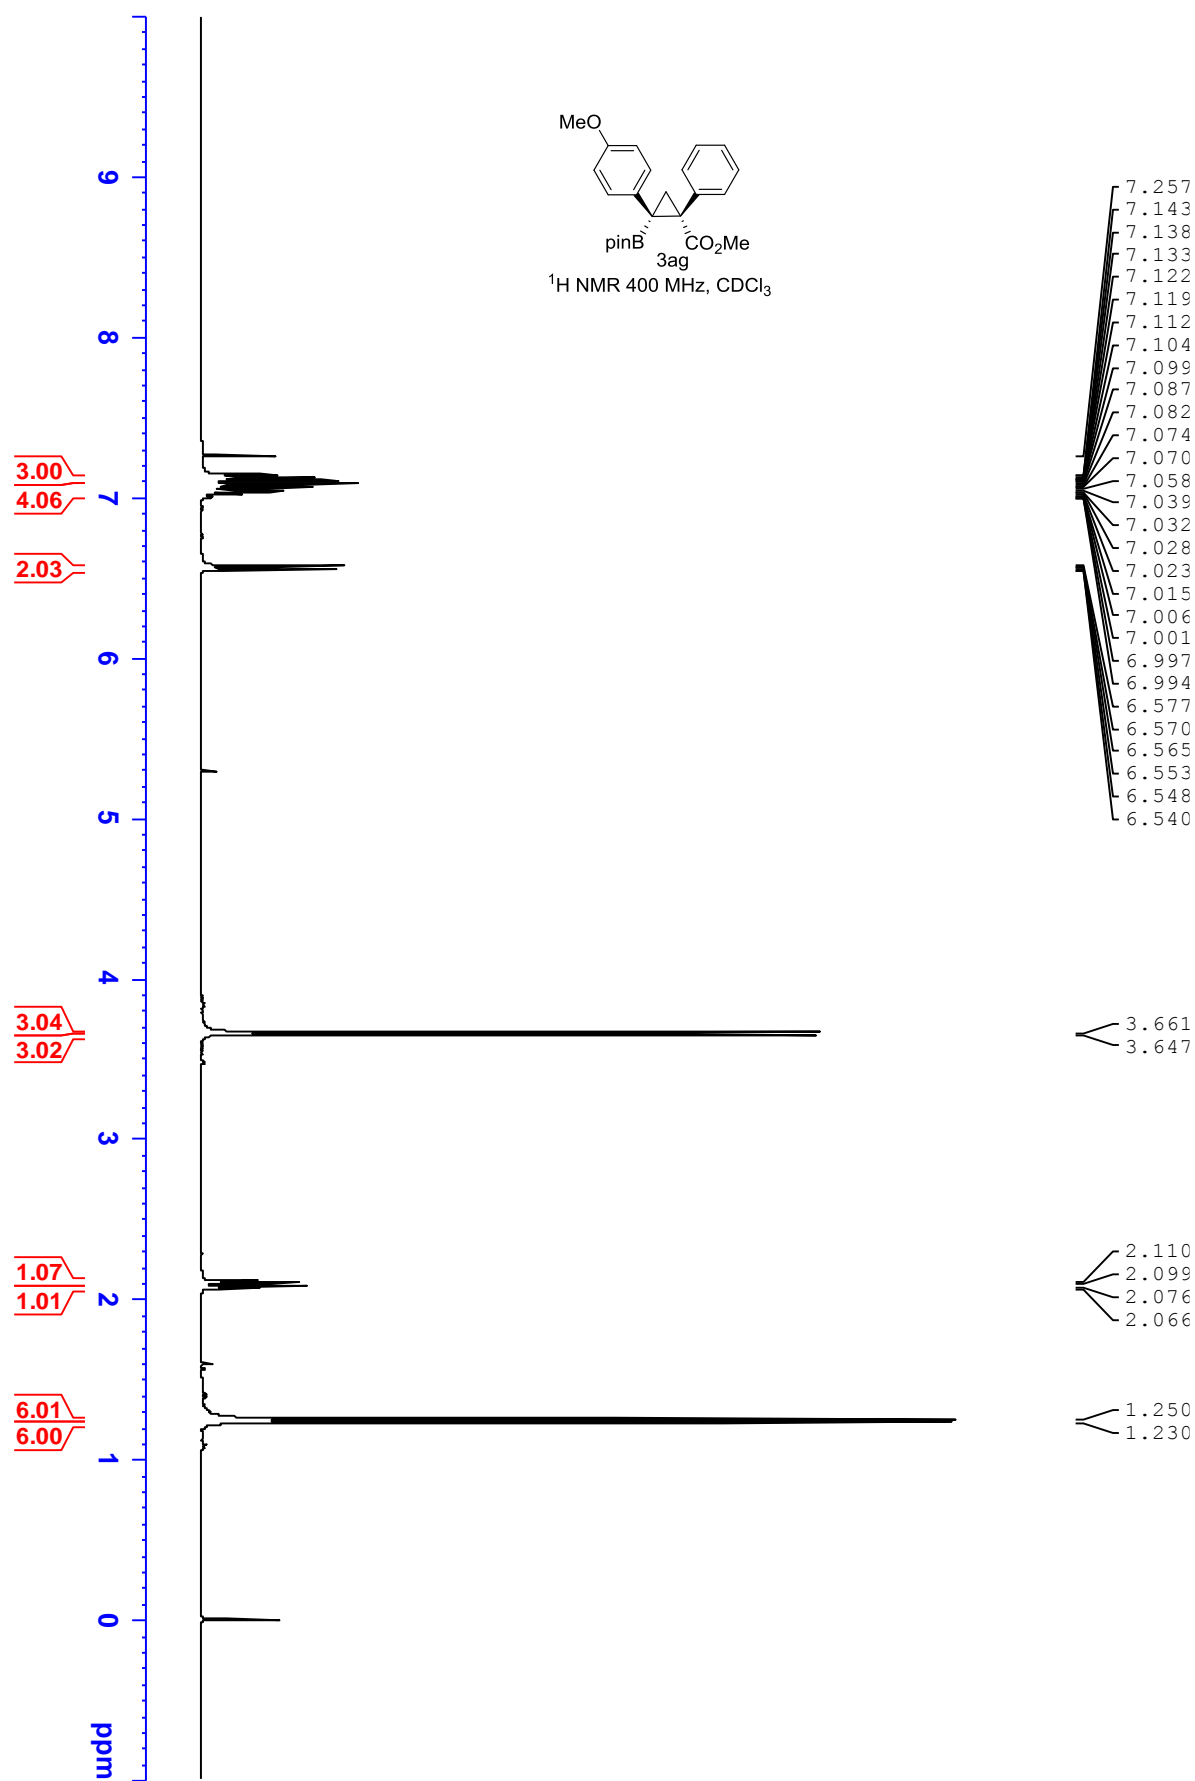

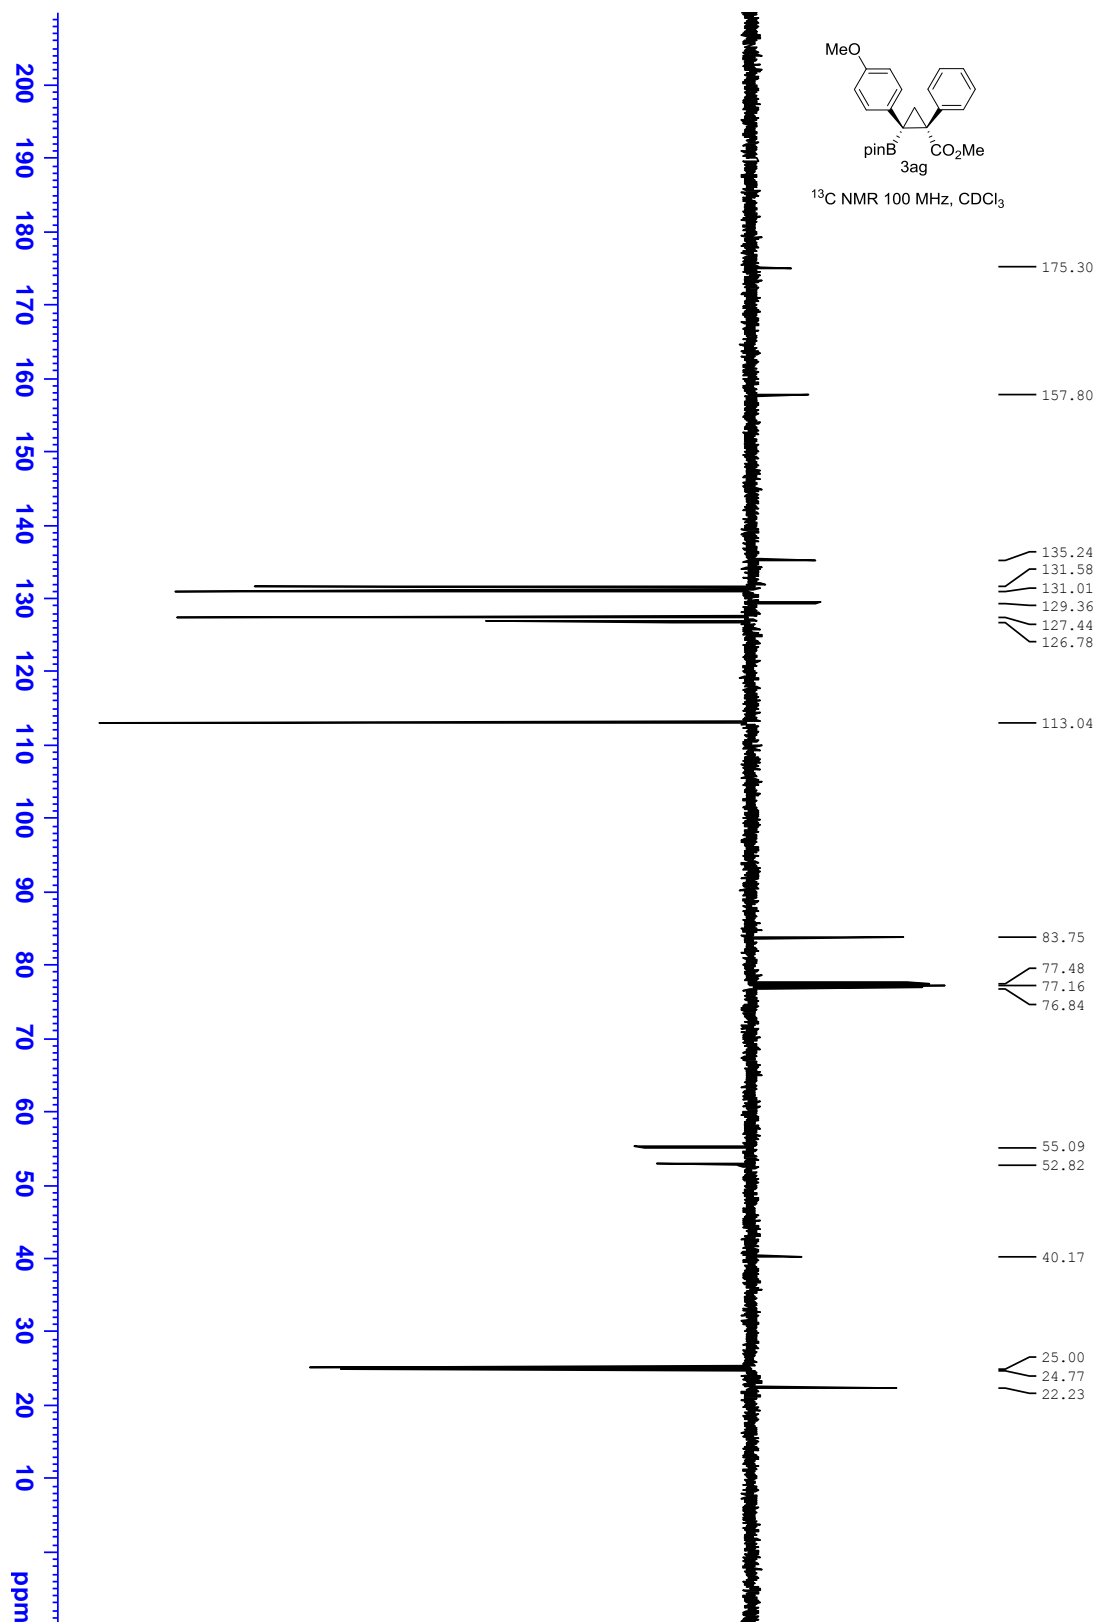

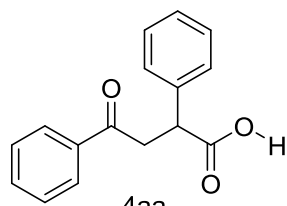

4aa

<sup>1</sup>H NMR 400 MHz, CDCl<sub>3</sub>

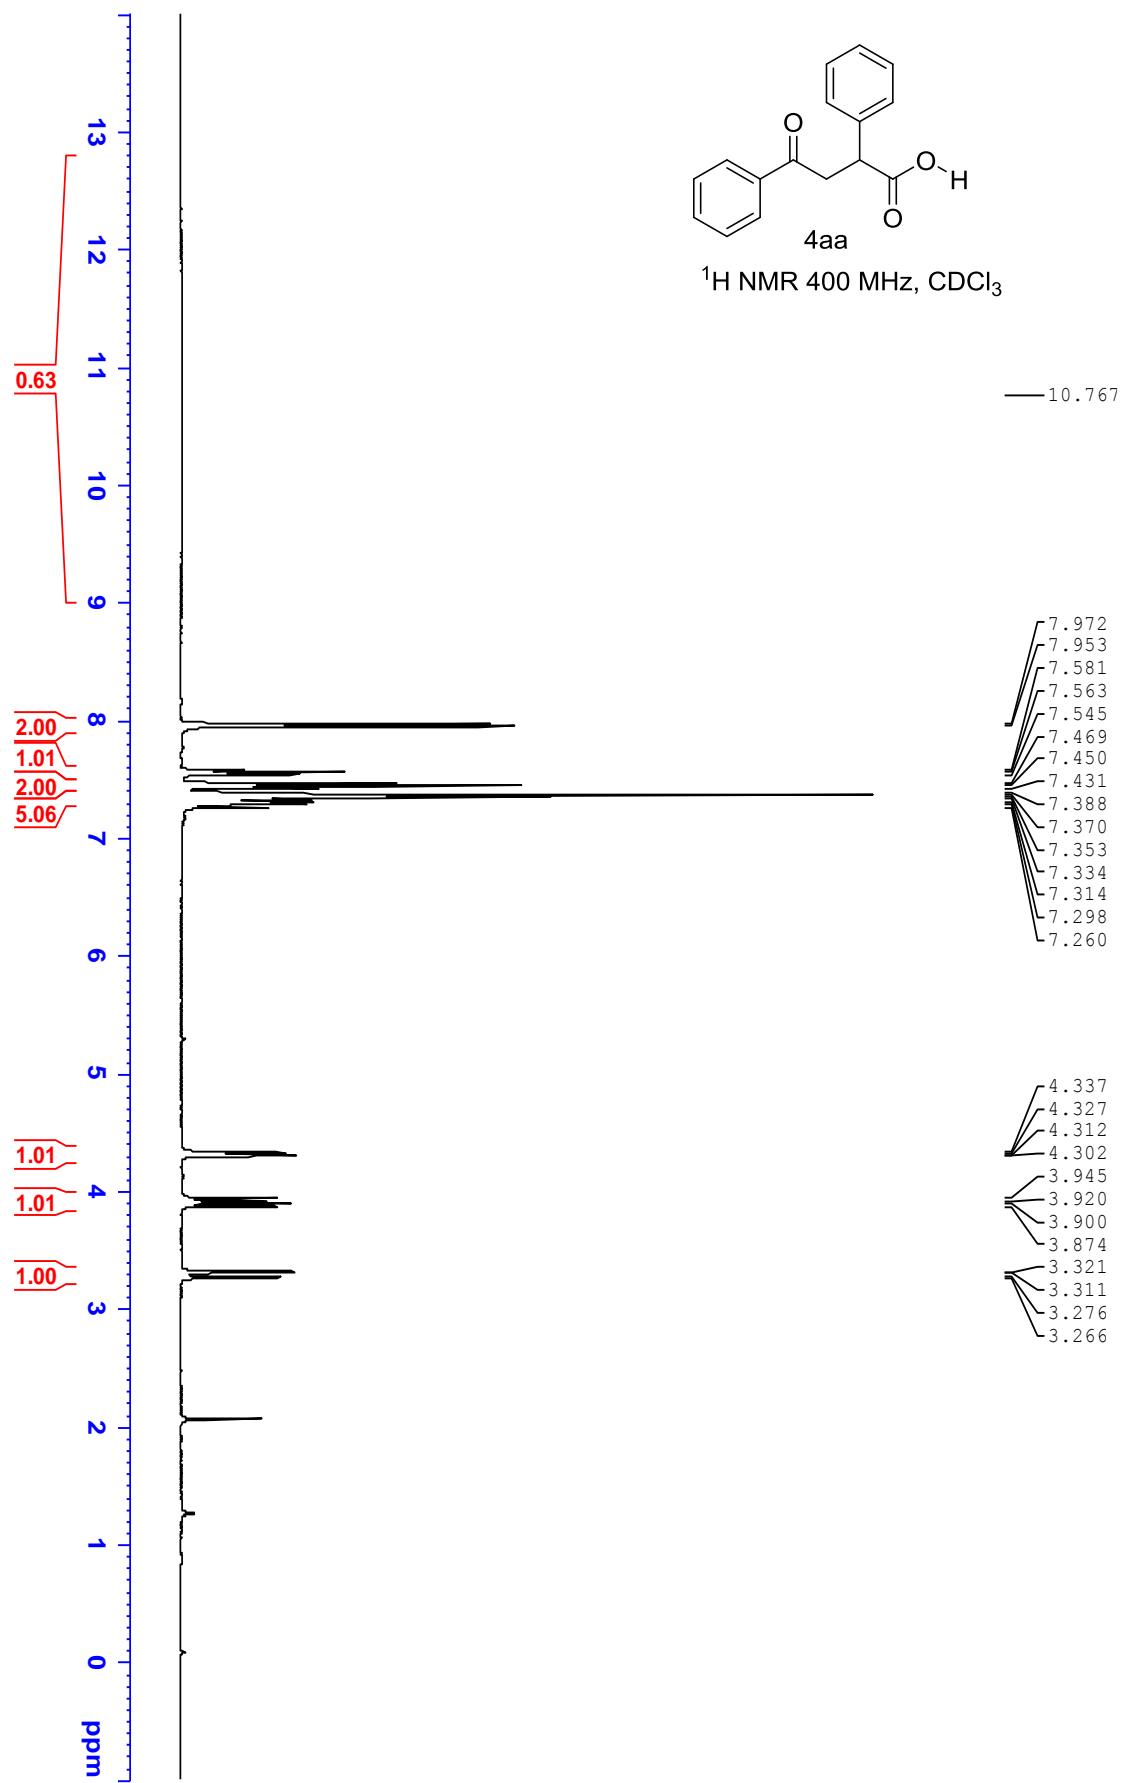

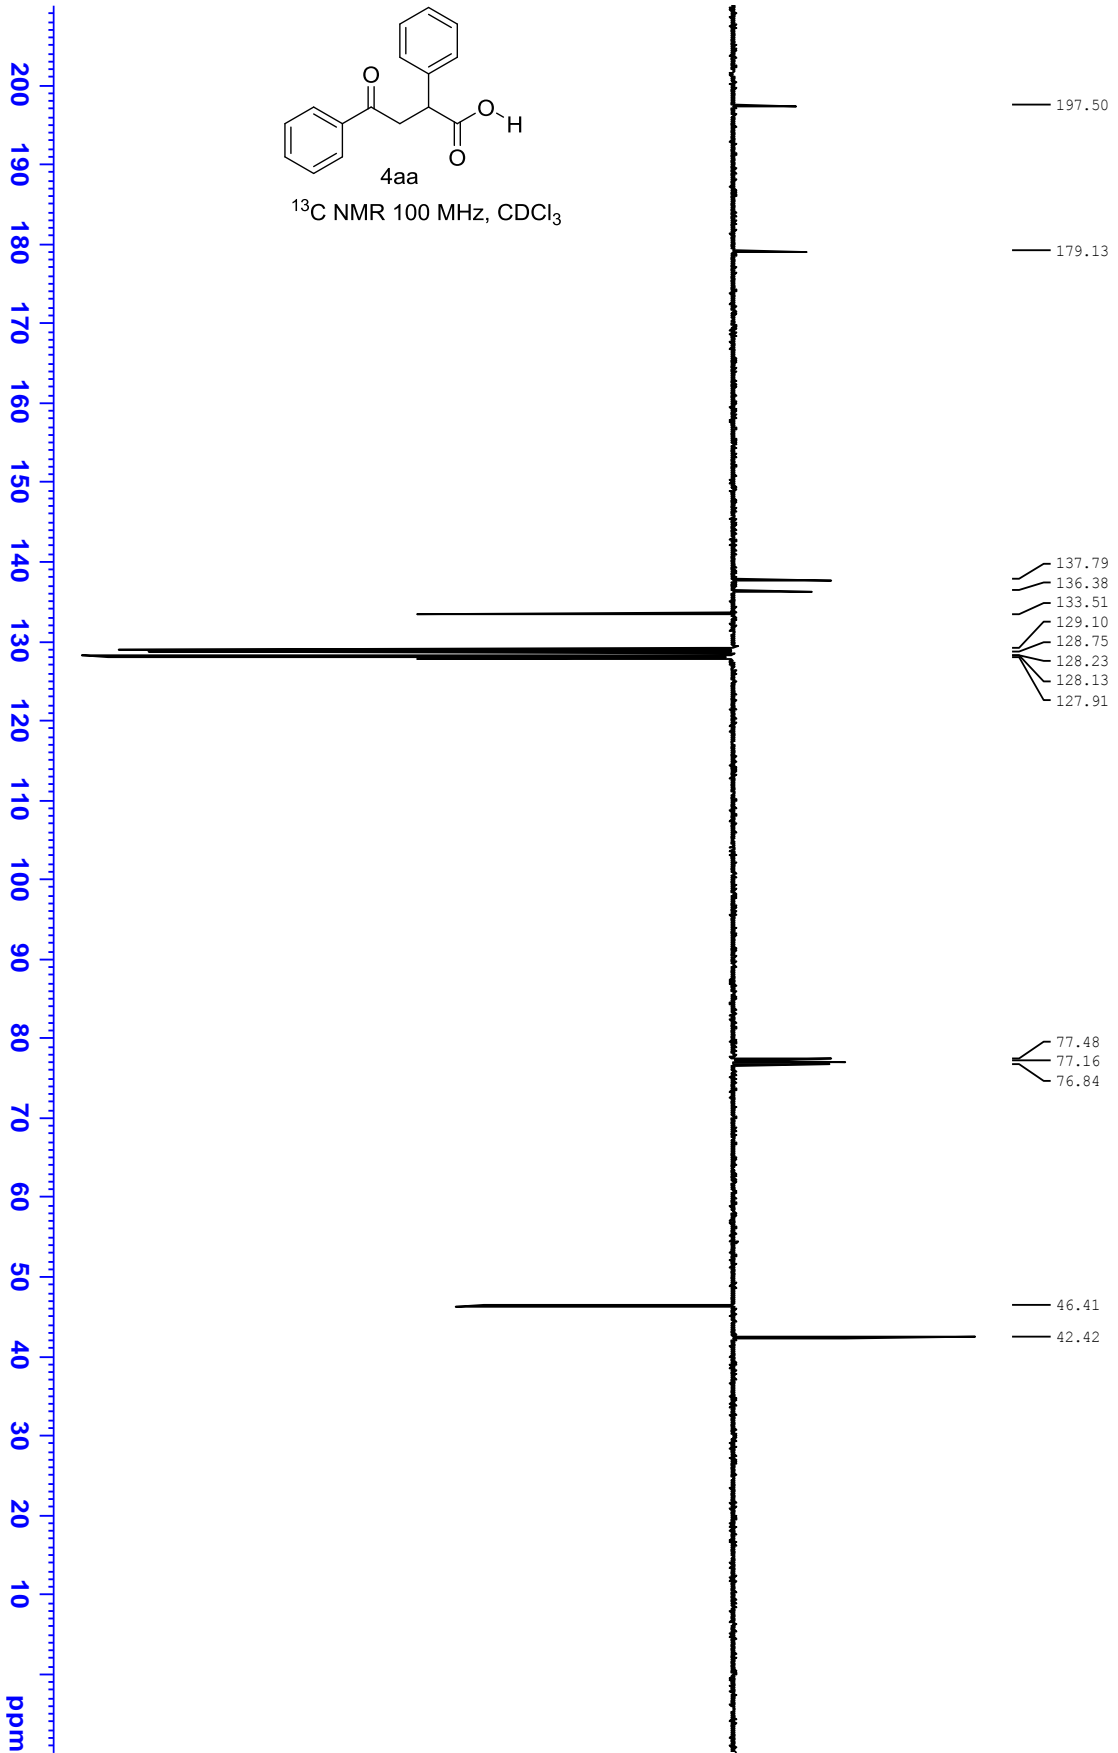

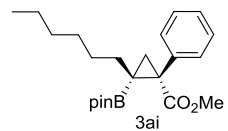

<sup>1</sup>H NMR 400 MHz, CDCl<sub>3</sub>

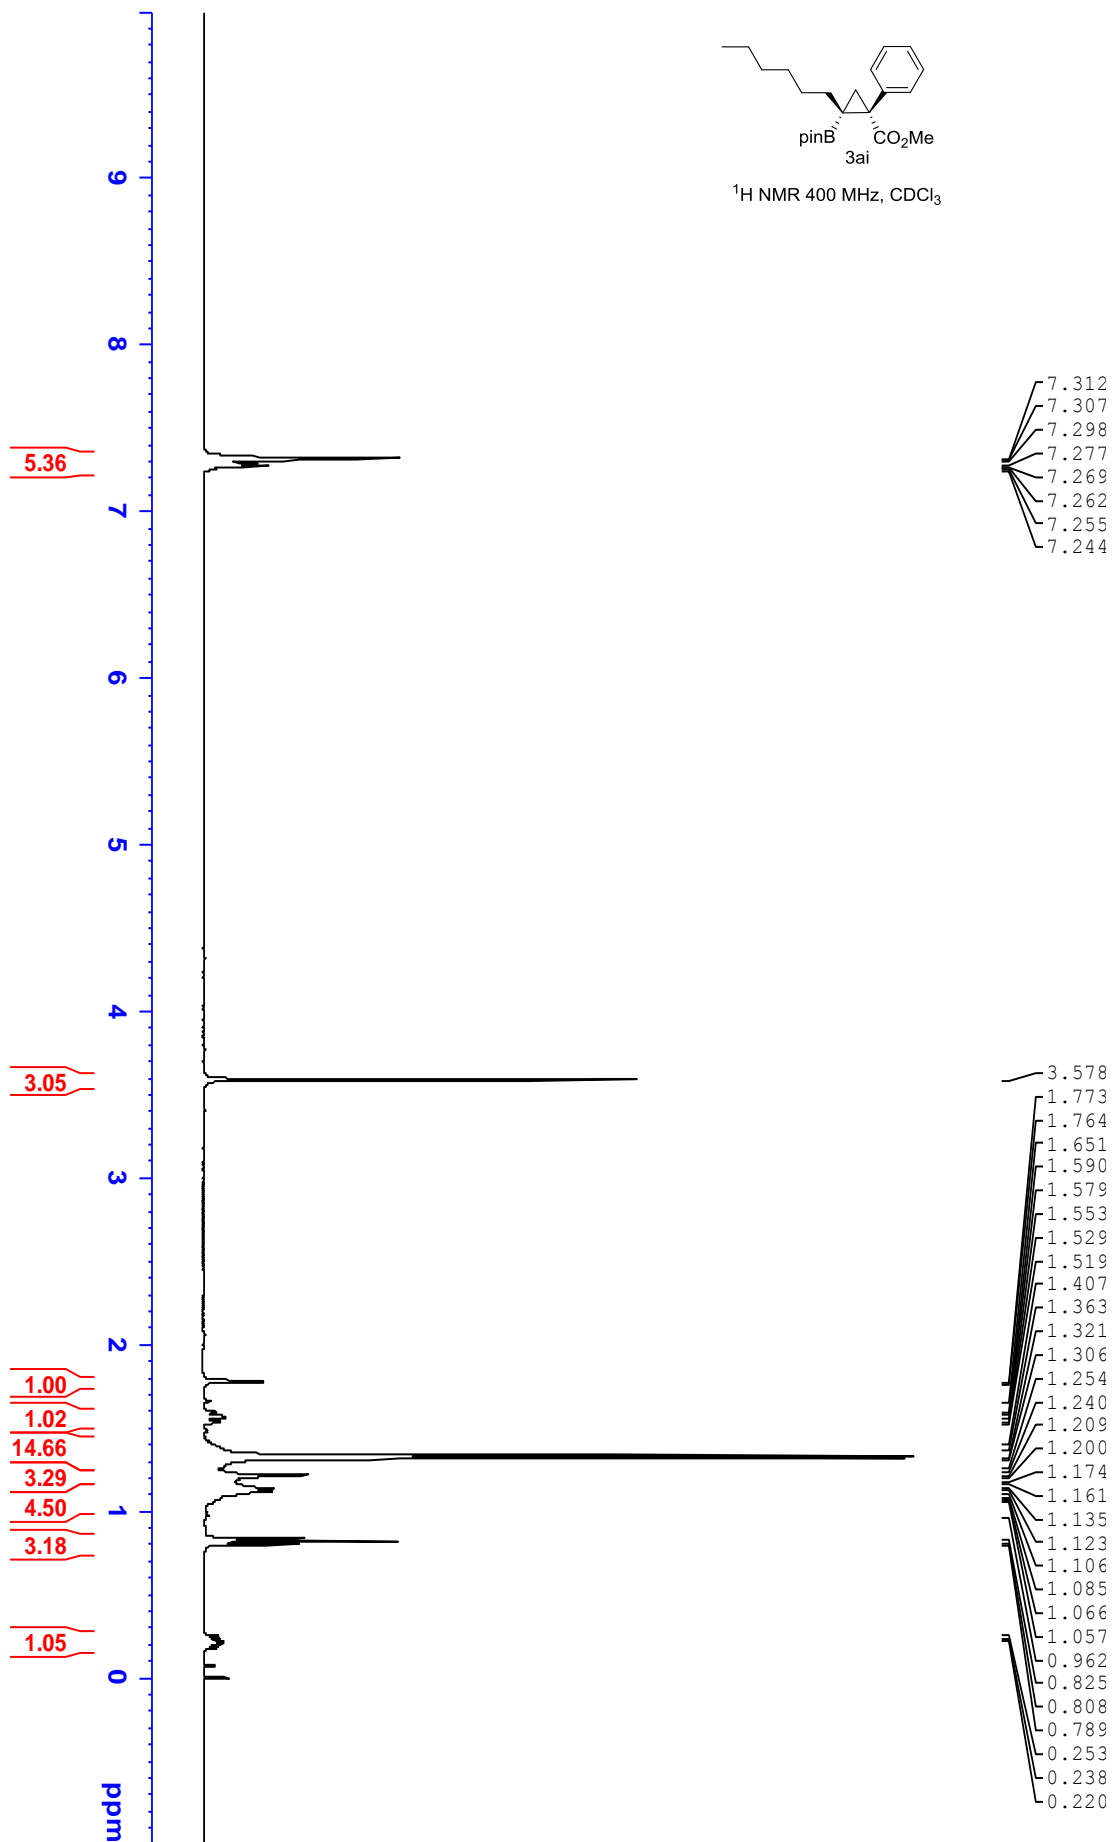

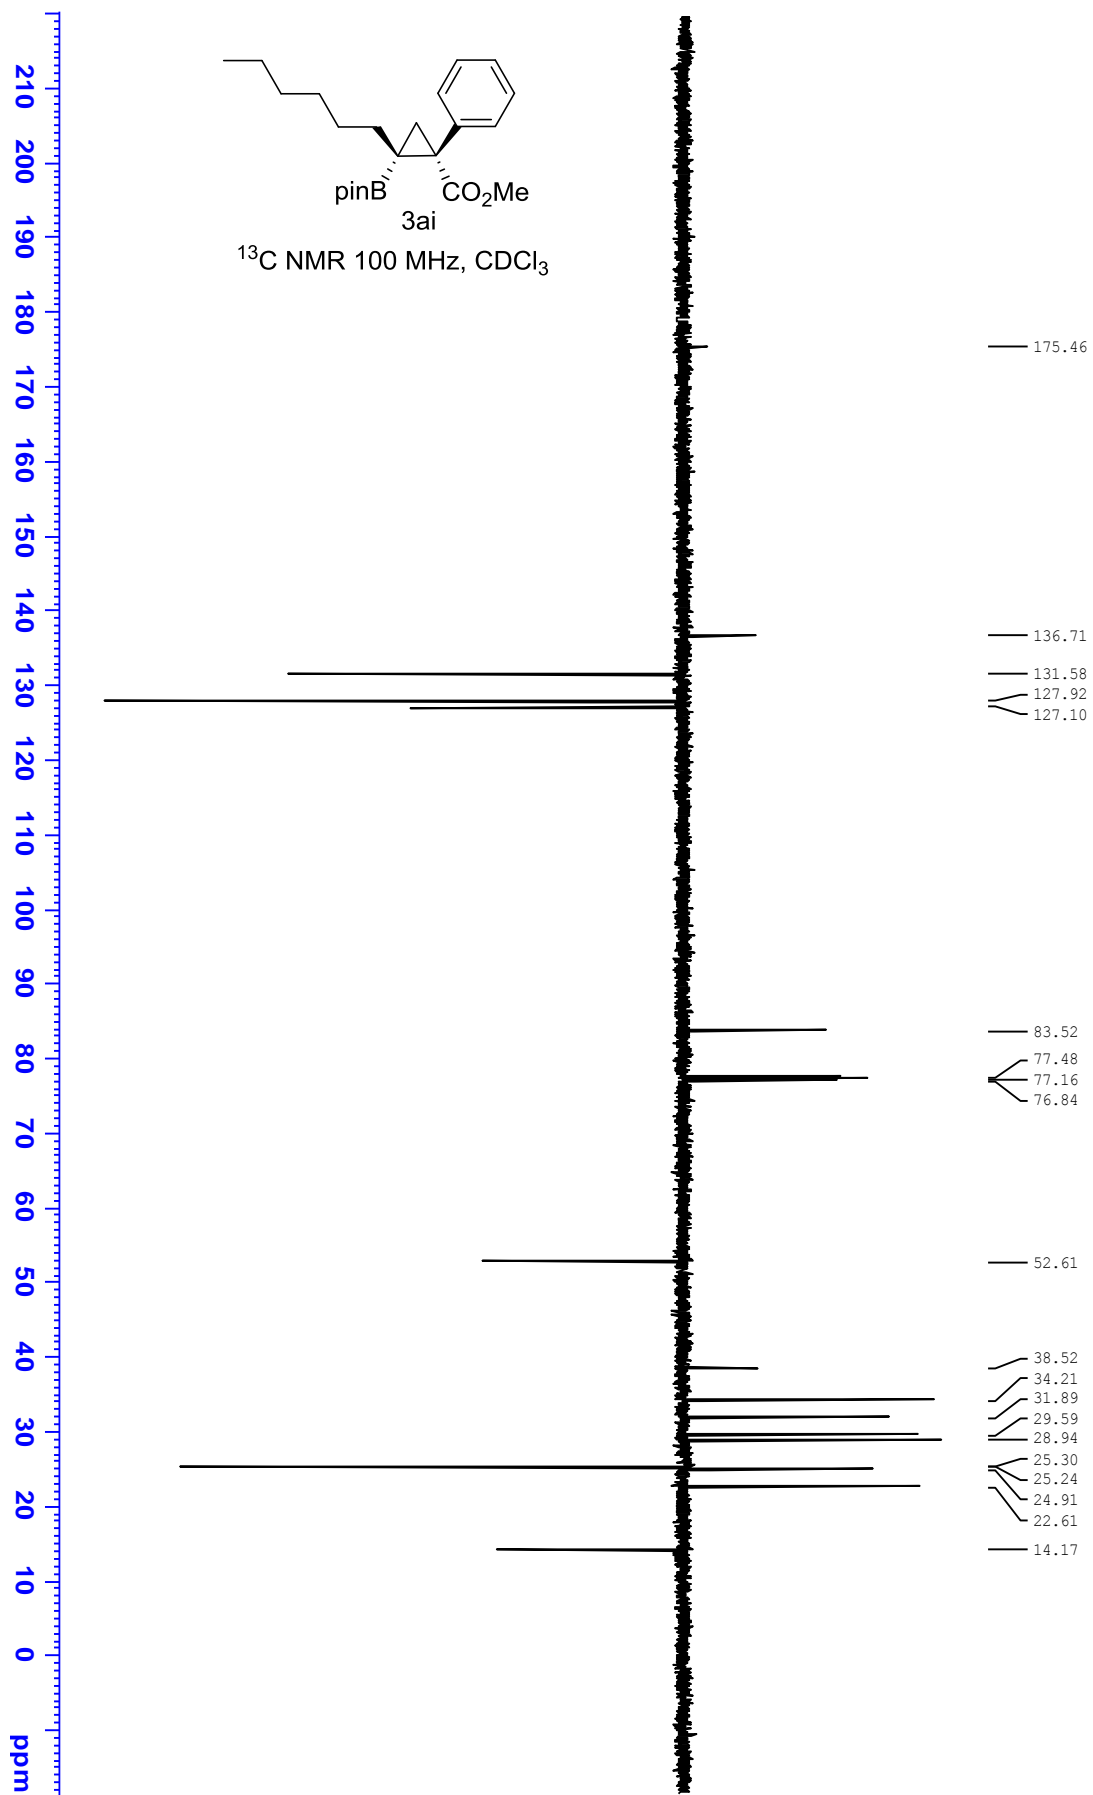

Supplement: d0cc02549f1.pdf [file d0cc02549f1.pdf]
